# Supplementary material for: Transcriptomics characteristics and differentiation of subcutaneous adipose tissue among Huainan pigs and its hybrid genetic populations
Source: Front Vet Sci. 2025 May 22;12:1545694. doi: 10.3389/fvets.2025.1545694 (PMC12139212; doi:10.3389/fvets.2025.1545694)
Supplement: Supplementary file 1 [file Table_1.xlsx]

## Sheet: Sheet1
gene_id	chr	start	end	strand	gene_name	EntrezID	transcript_id	GO	KEGG	KO_ENTRY	EC	TF_Family	Description	trans_type	FPKM.BH1	FPKM.BH2	FPKM.BH3	FPKM.HN1	FPKM.HN2	FPKM.HN3	FPKM.LH1	FPKM.LH2	FPKM.LH3	FPKM.YH1	FPKM.YH2	FPKM.YH3	count.BH1	count.BH2	count.BH3	count.HN1	count.HN2	count.HN3	count.LH1	count.LH2	count.LH3	count.YH1	count.YH2	count.YH3
ENSSSCG00000000002	chr5	3227816	3242789	-	GTSE1	100520739	ENSSSCT00000000003	GO:0005737(cytoplasm);GO:0005856(cytoskeleton);GO:0005881(cytoplasmic microtubule)	04115(p53 signaling pathway)	NA	NA	NA	G2 and S-phase expressed 1 [Source:VGNC Symbol;Acc:VGNC:88745]	protein_coding	2.20144	1.49548	1.99138	1.78915	1.65396	0.698746	1.2057	1.59143	1.08799	1.23793	1.22149	1.07005	251	163	272	195	227	91	161	225	161	166	141	127
ENSSSCG00000000003	chr5	3248346	3269797	-	TTC38	100518372	ENSSSCT00000052628;ENSSSCT00000064304;ENSSSCT00000000004	NA	NA	NA	NA	NA	tetratricopeptide repeat domain 38 [Source:VGNC Symbol;Acc:VGNC:94550]	protein_coding	14.0883	17.3809	26.0596	20.1202	19.0185	14.7187	16.8612	16.59	14.7832	18.8663	15.4461	15.2192	1487	1749	3292	2023	2415	1760	2080	2170	2021	2340	1651	1668
ENSSSCG00000000005	chr5	3292022	3296307	+	CDPF1	100518729	ENSSSCT00000000006	NA	NA	NA	NA	NA	cysteine rich DPF motif domain containing 1 [Source:VGNC Symbol;Acc:VGNC:86520]	protein_coding	24.1709	19.2119	18.6673	12.71	13.7065	19.7108	20.6074	24.6981	24.4936	30.1153	22.4724	21.5895	3008	2279	2780	1506	2052	2779	2997	3809	3947	4403	2832	2789
ENSSSCG00000000006	chr5	3300741	3364239	-	PPARA	397239	ENSSSCT00000000007	GO:0000122(negative regulation of transcription by RNA polymerase II);GO:0000978(RNA polymerase II cis-regulatory region sequence-specific DNA binding);GO:0001227(DNA-binding transcription repressor activity, RNA polymerase II-specific);GO:0001228(DNA-binding transcription activator activity, RNA polymerase II-specific);GO:0003677(DNA binding);GO:0003700(DNA-binding transcription factor activity)…	03320(PPAR signaling pathway);04024(cAMP signaling pathway);04920(Adipocytokine signaling pathway);04922(Glucagon signaling pathway);04931(Insulin resistance);04932(Non-alcoholic fatty liver disease);05160(Hepatitis C)	NA	NA	THR-like	peroxisome proliferator activated receptor alpha [Source:VGNC Symbol;Acc:VGNC:91682]	protein_coding	9.8054	4.87788	7.13104	2.34285	3.61531	5.65698	5.53417	10.3977	10.0644	9.54164	6.95185	4.59411	1720	816	1497	392	763	1125	1135	2260	2286	1967	1235	837
ENSSSCG00000000007	chr5	3208118	3224366	-	TRMU	100521087	ENSSSCT00000000008	GO:0000049(tRNA binding);GO:0002143(tRNA wobble position uridine thiolation);GO:0003723(RNA binding);GO:0005739(mitochondrion);GO:0008033(tRNA processing);GO:0016740(transferase activity);GO:0016783(sulfurtransferase activity)	NA	K21027	EC:2.8.1.14	NA	tRNA mitochondrial 2-thiouridylase [Source:VGNC Symbol;Acc:VGNC:94454]	protein_coding	12.4217	16.2428	11.1354	11.7945	12.3251	9.9159	13.0569	17.0604	15.2885	14.561	17.6394	15.8562	964	1201	1034	872	1150	872	1184	1640	1536	1327	1386	1277
ENSSSCG00000000010	chr5	3839502	3911709	-	FBLN1	100519144	ENSSSCT00000046398;ENSSSCT00000076272;ENSSSCT00000000011;ENSSSCT00000050278	GO:0001933(negative regulation of protein phosphorylation);GO:0001968(fibronectin binding);GO:0005178(integrin binding);GO:0005201(extracellular matrix structural constituent);GO:0005509(calcium ion binding);GO:0005576(extracellular region);GO:0005604(basement membrane);GO:0005615(extracellular space);GO:0007162(negative regulation of cell adhesion);GO:0008022(protein C-terminus binding);GO:00109…	NA	NA	NA	NA	fibulin 1 [Source:VGNC Symbol;Acc:VGNC:103280]	protein_coding	23.4191	14.1161	44.689	37.2271	35.6867	28.1704	52.3607	25.9969	34.683	19.3292	15.0864	22.7197	4222	2425	9635	6388	7735	5752	11025	5806	8092	4093	2754	4251
ENSSSCG00000000014	chr5	4070701	4101287	-	FAM118A	100739727	ENSSSCT00000022845;ENSSSCT00000000015	GO:0042802(identical protein binding);GO:0042802(identical protein binding)	NA	NA	NA	NA	family with sequence similarity 118 member A [Source:VGNC Symbol;Acc:VGNC:87893]	protein_coding	10.0295	5.97217	10.38	9.26168	8.69256	7.22127	10.0045	9.06223	10.6162	8.04375	7.0131	10.1883	1164	662	1442	1024	1214	950	1357	1304	1597	1097	825	1228
ENSSSCG00000000018	chr5	4152128	4195613	+	KIAA0930	100736589	ENSSSCT00000061018	NA	NA	NA	NA	NA	KIAA0930 [Source:VGNC Symbol;Acc:VGNC:89438]	protein_coding	79.2771	76.3564	64.1232	70.153	74.8025	100.07	89.848	96.178	97.372	88.637	183.217	116.201	26567	24384	25709	22385	30151	37994	35179	39935	42246	34893	62161	40424
ENSSSCG00000000019	chr5	4197544	4219230	-	NUP50	100519837	ENSSSCT00000059699;ENSSSCT00000000020	GO:0005634(nucleus);GO:0005635(nuclear envelope);GO:0005643(nuclear pore);GO:0005654(nucleoplasm);GO:0006606(protein import into nucleus);GO:0015031(protein transport);GO:0031965(nuclear membrane);GO:0043229(intracellular organelle);GO:0046907(intracellular transport);GO:0051028(mRNA transport);GO:0051028(mRNA transport)	03013(RNA transport);05014(Amyotrophic lateral sclerosis);05014(Amyotrophic lateral sclerosis)	NA	NA	NA	nucleoporin 50 [Source:VGNC Symbol;Acc:VGNC:90983]	protein_coding	11.4741	13.9857	13.301	10.5768	13.3606	13.1704	16.8765	17.845	15.4388	15.4192	14.0548	14.2595	2941	3417	4080	2582	4120	3825	5055	5668	5124	4644	3648	3795
ENSSSCG00000000020	chr5	4291396	4386247	+	PHF21B	100522673	ENSSSCT00000086082	GO:0046872(metal ion binding)	NA	NA	NA	NA	PHD finger protein 21B [Source:VGNC Symbol;Acc:VGNC:91385]	protein_coding	0.109411	0.0557711	0.349286	0.0266522	0.0200599	0.027355	0	0.124564	0.093345	0.0263831	0.177201	0.11942	15	7	54	4	4	4	0	20	16	4	24	16
ENSSSCG00000000021	chr5	4399744	4450465	-	ARHGAP8	100533202	ENSSSCT00000056308	GO:0005096(GTPase activator activity);GO:0005737(cytoplasm);GO:0007165(signal transduction);GO:0007264(small GTPase mediated signal transduction);GO:0050790(regulation of catalytic activity);GO:0070374(positive regulation of ERK1 and ERK2 cascade);GO:2001136(negative regulation of endocytic recycling)	NA	NA	NA	NA	Rho GTPase activating protein 8 [Source:NCBI gene (formerly Entrezgene);Acc:100533202]	protein_coding	0.352528	0	0.490253	0.17264	0	0	0	0	0	0	0	0	32	0	52	15	0	0	0	0	0	0	0	0
ENSSSCG00000000022	chr5	4649183	4655205	+	RTL6	100520193	ENSSSCT00000000023	NA	NA	NA	NA	NA	retrotransposon Gag like 6 [Source:VGNC Symbol;Acc:VGNC:92499]	protein_coding	8.0845	11.7317	8.84636	10.2693	10.0962	9.78724	8.62375	7.308	7.55804	7.31356	7.99477	9.07501	2240	3097	2932	2709	3364	3072	2791	2509	2711	2380	2242	2610
ENSSSCG00000000024	chr5	4906685	5015441	-	PARVB	100739768	ENSSSCT00000072505;ENSSSCT00000000025	GO:0003779(actin binding);GO:0005737(cytoplasm);GO:0005856(cytoskeleton);GO:0005886(plasma membrane);GO:0005925(focal adhesion);GO:0007155(cell adhesion);GO:0007163(establishment or maintenance of cell polarity);GO:0015629(actin cytoskeleton);GO:0030027(lamellipodium);GO:0030031(cell projection assembly);GO:0030032(lamellipodium assembly);GO:0031532(actin cytoskeleton reorganization);GO:0034446(s…	04510(Focal adhesion);04510(Focal adhesion)	NA	NA	NA	parvin beta [Source:VGNC Symbol;Acc:VGNC:91186]	protein_coding	6.88635	6.9779	5.65322	3.25339	3.65971	6.20324	5.38737	6.03092	6.67544	3.67596	5.47262	5.19812	1261	1218	1240	568	807	1288	1154	1369	1583	791	1015	989
ENSSSCG00000000025	chr5	4873153	4898647	-	PARVG	100520379	ENSSSCT00000000026;ENSSSCT00000065458	GO:0003779(actin binding);GO:0005737(cytoplasm);GO:0005856(cytoskeleton);GO:0005886(plasma membrane);GO:0005925(focal adhesion);GO:0007155(cell adhesion);GO:0007163(establishment or maintenance of cell polarity);GO:0015629(actin cytoskeleton);GO:0030031(cell projection assembly);GO:0031532(actin cytoskeleton reorganization);GO:0034446(substrate adhesion-dependent cell spreading);GO:0034446(substr…	04510(Focal adhesion);04510(Focal adhesion)	NA	NA	NA	parvin gamma [Source:VGNC Symbol;Acc:VGNC:91187]	protein_coding	3.34128	1.21664	1.63915	3.17219	2.90809	1.43301	0.659988	0.987898	1.69425	2.1443	1.13739	0.917768	456	159	267	412	477	222	105	168	299	344	157	131
ENSSSCG00000000028	chr5	5375714	5408124	+	ENSSSCG00000000028		ENSSSCT00000000029	GO:0005509(calcium ion binding);GO:0005654(nucleoplasm)	NA	NA	NA	NA		protein_coding	0	0.063019	0.13526	0	0	0	0.111283	0.022346	0	0.100172	0	0	0	5	12	0	0	0	10	2	0	9	0	0
ENSSSCG00000000029	chr5	5561505	5692328	+	SCUBE1	100524621	ENSSSCT00000042951	GO:0005509(calcium ion binding);GO:0005615(extracellular space);GO:0009897(external side of plasma membrane);GO:0009986(cell surface);GO:0019897(extrinsic component of plasma membrane);GO:0042802(identical protein binding);GO:0045880(positive regulation of smoothened signaling pathway)	NA	NA	NA	NA	signal peptide, CUB domain and EGF like domain containing 1 [Source:VGNC Symbol;Acc:VGNC:92650]	protein_coding	0.692452	0.270382	0.089782	0.260602	0.363768	0.618511	0.132959	0.348164	0.287184	0.216995	0.065925	0.135365	283	106	44	102	179	286	64	176	152	104	28	58
ENSSSCG00000000031	chr5	5742185	5751104	+	MCAT	100523602	ENSSSCT00000034350;ENSSSCT00000051624	GO:0004312(fatty acid synthase activity);GO:0004314([acyl-carrier-protein] S-malonyltransferase activity);GO:0005739(mitochondrion);GO:0006631(fatty acid metabolic process);GO:0006633(fatty acid biosynthetic process);GO:0016419(S-malonyltransferase activity);GO:0016740(transferase activity);GO:0032787(monocarboxylic acid metabolic process);GO:0032787(monocarboxylic acid metabolic process)	00061(Fatty acid biosynthesis);01100(Metabolic pathways);01212(Fatty acid metabolism);01212(Fatty acid metabolism)	K00645	EC:2.3.1.39	NA	malonyl-CoA-acyl carrier protein transacylase [Source:VGNC Symbol;Acc:VGNC:90062]	protein_coding	7.25787	6.2258	6.12593	7.30609	7.30321	6.9299	6.09854	5.65049	7.87443	7.8231	6.6758	8.04004	903	738	912	865	1092	977	886	871	1268	1143	841	1038
ENSSSCG00000000033	chr5	5723190	5735131	-	TSPO	396592	ENSSSCT00000058616;ENSSSCT00000000035	GO:0005739(mitochondrion);GO:0005783(endoplasmic reticulum);GO:0005829(cytosol);GO:0006869(lipid transport);GO:0010823(negative regulation of mitochondrion organization);GO:0015485(cholesterol binding);GO:0016020(membrane);GO:0016021(integral component of membrane);GO:0031397(negative regulation of protein ubiquitination);GO:0031966(mitochondrial membrane);GO:0043231(intracellular membrane-bounde…	04080(Neuroactive ligand-receptor interaction);04979(Cholesterol metabolism);05166(Human T-cell leukemia virus 1 infection);05166(Human T-cell leukemia virus 1 infection)	NA	NA	NA	translocator protein [Source:NCBI gene (formerly Entrezgene);Acc:396592]	protein_coding	511.99	491.731	459.232	530.434	537.372	500.217	470.088	426.917	477.428	719.125	431.873	631.372	22050	20182	23663	21752	27838	24408	23655	22782	26621	36383	18832	28229
ENSSSCG00000000034	chr5	5701583	5720724	+	TTLL12	100621422	ENSSSCT00000078462	GO:0005737(cytoplasm);GO:0007346(regulation of mitotic cell cycle);GO:0015631(tubulin binding);GO:0060339(negative regulation of type I interferon-mediated signaling pathway);GO:1990889(H4K20me3 modified histone binding)	NA	NA	NA	NA	tubulin tyrosine ligase like 12 [Source:VGNC Symbol;Acc:VGNC:94568]	protein_coding	19.881	16.3193	16.0344	18.4967	18.6991	17.6758	20.9675	19.9068	15.5304	22.5247	20.624	19.2005	4548	3557	4388	4029	5145	4581	5604	5642	4599	6053	4776	4560
ENSSSCG00000000035	chr5	5793836	5827633	+	TTLL1	100621517	ENSSSCT00000000037;ENSSSCT00000078160;ENSSSCT00000072800;ENSSSCT00000053033	GO:0000226(microtubule cytoskeleton organization);GO:0002395(immune response in nasopharyngeal-associated lymphoid tissue);GO:0003351(epithelial cilium movement involved in extracellular fluid movement);GO:0005576(extracellular region);GO:0005856(cytoskeleton);GO:0005874(microtubule);GO:0005929(cilium);GO:0007288(sperm axoneme assembly);GO:0015631(tubulin binding);GO:0016874(ligase activity);GO:0…	NA	NA	NA	NA	TTL family tubulin polyglutamylase complex subunit L1 [Source:VGNC Symbol;Acc:VGNC:94566]	protein_coding	12.0745	10.0171	14.9615	8.84588	10.3729	16.9381	12.7924	12.8167	10.8625	9.68833	15.2198	10.788	1282	1014	1899	895	1323	2037	1587	1685	1493	1208	1635	1188
ENSSSCG00000000036	chr5	5853377	5985169	+	PACSIN2	100523786	ENSSSCT00000065730;ENSSSCT00000063611;ENSSSCT00000000038;ENSSSCT00000058272	GO:0005543(phospholipid binding);GO:0005737(cytoplasm);GO:0005768(endosome);GO:0005769(early endosome);GO:0005829(cytosol);GO:0005856(cytoskeleton);GO:0005886(plasma membrane);GO:0005901(caveola);GO:0005911(cell-cell junction);GO:0007010(cytoskeleton organization);GO:0008092(cytoskeletal protein binding);GO:0008289(lipid binding);GO:0010008(endosome membrane);GO:0016020(membrane);GO:0016301(kinas…	NA	NA	NA	NA	protein kinase C and casein kinase substrate in neurons 2 [Source:VGNC Symbol;Acc:VGNC:91143]	protein_coding	34.6324	36.4793	35.7886	47.1729	46.1051	41.6428	33.4501	31.9912	29.9264	38.8451	33.0192	33.106	6826	6851	8438	8852	10928	9299	7704	7813	7636	8993	6589	6773
ENSSSCG00000000037	chr5	5994181	6055091	+	ARFGAP3	100523962	ENSSSCT00000073891;ENSSSCT00000000039;ENSSSCT00000044776;ENSSSCT00000074631	GO:0005096(GTPase activator activity);GO:0005794(Golgi apparatus);GO:0005829(cytosol);GO:0009306(protein secretion);GO:0050790(regulation of catalytic activity);GO:0050790(regulation of catalytic activity)	04144(Endocytosis);04144(Endocytosis)	NA	NA	NA	ADP ribosylation factor GTPase activating protein 3 [Source:VGNC Symbol;Acc:VGNC:85450]	protein_coding	12.6379	12.0352	14.8165	16.2025	16.2513	14.0287	11.8162	13.0647	11.8811	12.9125	9.73842	13.1176	4169	3784	5847	5089	6449	5243	4554	5340	5075	5005	3253	4492
ENSSSCG00000000038	chr5	6146276	6170202	+	CYB5R3	100524254	ENSSSCT00000076327;ENSSSCT00000091240;ENSSSCT00000000040	GO:0004128(cytochrome-b5 reductase activity, acting on NAD(P)H);GO:0005783(endoplasmic reticulum);GO:0005811(lipid droplet);GO:0006809(nitric oxide biosynthetic process);GO:0016020(membrane);GO:0016021(integral component of membrane);GO:0016491(oxidoreductase activity);GO:0050421(nitrite reductase (NO-forming) activity);GO:1903958(nitric-oxide synthase complex);GO:1903958(nitric-oxide synthase co…	00520(Amino sugar and nucleotide sugar metabolism);00520(Amino sugar and nucleotide sugar metabolism)	K00326	EC:1.6.2.2	NA	cytochrome b5 reductase 3 [Source:VGNC Symbol;Acc:VGNC:103227]	protein_coding	156.903	143.469	213.837	157.878	154.731	147.599	152.514	132.068	114.757	150.387	144.221	109.576	14921	13002	24329	14295	17700	15902	16946	15561	14129	16800	13886	10818
ENSSSCG00000000039	chr5	6169401	6201938	+	POLDIP3	100525164	ENSSSCT00000079682;ENSSSCT00000057438;ENSSSCT00000084220;ENSSSCT00000048614;ENSSSCT00000086723;ENSSSCT00000000041;ENSSSCT00000075015	GO:0003676(nucleic acid binding);GO:0003723(RNA binding);GO:0003729(mRNA binding);GO:0005634(nucleus);GO:0006406(mRNA export from nucleus);GO:0016607(nuclear speck);GO:0016973(poly(A)+ mRNA export from nucleus);GO:0036464(cytoplasmic ribonucleoprotein granule);GO:0044877(protein-containing complex binding);GO:0045727(positive regulation of translation);GO:0045727(positive regulation of translatio…	NA	NA	NA	NA	DNA polymerase delta interacting protein 3 [Source:VGNC Symbol;Acc:VGNC:91630]	protein_coding	16.0289	13.9025	18.027	20.2015	19.2591	14.459	15.7356	14.7387	14.4869	19.8978	13.0034	16.3133	5900	4877	7937	7078	8525	6029	6766	6720	6903	8601	4847	6233
ENSSSCG00000000040	chr5	6631755	6660702	-	SEPTIN3	100157034	ENSSSCT00000000042;ENSSSCT00000040807;ENSSSCT00000104732;ENSSSCT00000069730;ENSSSCT00000082407	GO:0000166(nucleotide binding);GO:0003924(GTPase activity);GO:0005525(GTP binding);GO:0005737(cytoplasm);GO:0005856(cytoskeleton);GO:0005940(septin ring);GO:0008104(protein localization);GO:0015630(microtubule cytoskeleton);GO:0031105(septin complex);GO:0032153(cell division site);GO:0043005(neuron projection);GO:0060090(molecular adaptor activity);GO:0061640(cytoskeleton-dependent cytokinesis);G…	05100(Bacterial invasion of epithelial cells);05100(Bacterial invasion of epithelial cells)	NA	NA	NA	septin 3 [Source:VGNC Symbol;Acc:VGNC:92722]	protein_coding	0.074911	0	0.118357	0.0893445	0.0806453	0.0314782	0.0107519	0.0680459	0.0449667	0.0246175	0.0515893	0.0232277	24	0	46	28	31	12	4	29	19	10	17	8
ENSSSCG00000000045	chr5	6562011	6567647	+	NDUFA6	100157442	ENSSSCT00000000049	GO:0005739(mitochondrion);GO:0005743(mitochondrial inner membrane);GO:0005747(mitochondrial respiratory chain complex I);GO:0006979(response to oxidative stress);GO:0016020(membrane);GO:0031966(mitochondrial membrane);GO:0032981(mitochondrial respiratory chain complex I assembly);GO:0070469(respirasome)	NA	NA	NA	NA	NADH:ubiquinone oxidoreductase subunit A6 [Source:VGNC Symbol;Acc:VGNC:90637]	protein_coding	29.5167	25.2933	22.1294	22.4984	22.1381	27.8944	19.3633	20.8223	29.5201	33.1414	43.0124	23.1848	1785	1458	1601	1296	1610	1911	1368	1560	2311	2354	2633	1456
ENSSSCG00000000046	chr5	6538907	6543642	+	CYP2D6	397687,107987479,1564	ENSSSCT00000000051	GO:0004497(monooxygenase activity);GO:0005506(iron ion binding);GO:0005737(cytoplasm);GO:0005739(mitochondrion);GO:0005789(endoplasmic reticulum membrane);GO:0006082(organic acid metabolic process);GO:0006805(xenobiotic metabolic process);GO:0008202(steroid metabolic process);GO:0008210(estrogen metabolic process);GO:0008395(steroid hydroxylase activity);GO:0009804(coumarin metabolic process);GO:…	00140(Steroid hormone biosynthesis);04726(Serotonergic synapse)	K07414	EC:1.14.14.1	NA	cytochrome P450 family 2 subfamily D member 6 [Source:VGNC Symbol;Acc:VGNC:103547]	protein_coding	3.27989	0.993608	0.965994	0.243157	0.576136	0.465457	0.786079	0.629727	0.367516	0.239469	0.853731	0.464031	275	80	97	20	58	45	77	66	40	24	73	41
ENSSSCG00000000050	chr5	6571020	6588055	+	NAGA	100142667	ENSSSCT00000046821;ENSSSCT00000055363	GO:0004553(hydrolase activity, hydrolyzing O-glycosyl compounds);GO:0005764(lysosome);GO:0005975(carbohydrate metabolic process);GO:0006629(lipid metabolic process);GO:0008152(metabolic process);GO:0008456(alpha-N-acetylgalactosaminidase activity);GO:0016052(carbohydrate catabolic process);GO:0016787(hydrolase activity);GO:0016798(hydrolase activity, acting on glycosyl bonds);GO:0019377(glycolipi…	00603(Glycosphingolipid biosynthesis - globo and isoglobo series);01100(Metabolic pathways);04142(Lysosome);04142(Lysosome)	K01204	EC:3.2.1.49	NA	alpha-N-acetylgalactosaminidase [Source:VGNC Symbol;Acc:VGNC:90569]	protein_coding	13.849	12.9673	13.0585	16.0138	15.7136	12.7973	15.648	14.8885	11.4222	14.6371	13.1255	14.4502	2576	2299	2906	2836	3515	2697	3401	3431	2751	3199	2472	2791
ENSSSCG00000000058	chr5	6891022	6900022	+	SNU13	100155420	ENSSSCT00000038079;ENSSSCT00000023171	GO:0000398(mRNA splicing, via spliceosome);GO:0000470(maturation of LSU-rRNA);GO:0000492(box C/D snoRNP assembly);GO:0003723(RNA binding);GO:0005634(nucleus);GO:0005730(nucleolus);GO:0007338(single fertilization);GO:0030490(maturation of SSU-rRNA);GO:0031428(box C/D RNP complex);GO:0032040(small-subunit processome);GO:0034512(box C/D RNA binding);GO:0042254(ribosome biogenesis);GO:0046540(U4/U6 x…	03008(Ribosome biogenesis in eukaryotes);03040(Spliceosome);03040(Spliceosome)	NA	NA	NA	small nuclear ribonucleoprotein 13 [Source:NCBI gene (formerly Entrezgene);Acc:100155420]	protein_coding	56.9511	48.9902	49.2248	48.4549	52.9866	51.6077	55.3039	61.0493	59.5881	54.7012	63.4966	54.8373	3791	3108	3920	3072	4243	3893	4301	5036	5135	4277	4279	3790
ENSSSCG00000000059	chr5	6903495	6929052	-	XRCC6	100154200	ENSSSCT00000095358;ENSSSCT00000102712;ENSSSCT00000070289	GO:0000166(nucleotide binding);GO:0000723(telomere maintenance);GO:0000976(transcription cis-regulatory region binding);GO:0002218(activation of innate immune response);GO:0003677(DNA binding);GO:0003678(DNA helicase activity);GO:0003684(damaged DNA binding);GO:0003690(double-stranded DNA binding);GO:0003691(double-stranded telomeric DNA binding);GO:0004386(helicase activity);GO:0005524(ATP bindi…	03450(Non-homologous end-joining);03450(Non-homologous end-joining)	NA	NA	NA	X-ray repair cross complementing 6 [Source:VGNC Symbol;Acc:VGNC:95011]	protein_coding	14.241	14.8806	19.3665	15.4058	15.219	16.2717	18.1535	17.0433	19.4998	20.4095	15.7127	15.2323	1831	1823	2980	1886	2354	2370	2728	2715	3246	3083	2046	2034
ENSSSCG00000000061	chr5	6964999	6975904	+	PMM1	100151790	ENSSSCT00000000067	GO:0004615(phosphomannomutase activity);GO:0005737(cytoplasm);GO:0005829(cytosol);GO:0006013(mannose metabolic process);GO:0006487(protein N-linked glycosylation);GO:0009298(GDP-mannose biosynthetic process);GO:0016853(isomerase activity);GO:0043025(neuronal cell body);GO:1990830(cellular response to leukemia inhibitory factor)	00051(Fructose and mannose metabolism);00520(Amino sugar and nucleotide sugar metabolism);01100(Metabolic pathways);01240(Biosynthesis of cofactors)	K17497	EC:5.4.2.8	NA	phosphomannomutase 1 [Source:VGNC Symbol;Acc:VGNC:91589]	protein_coding	8.17145	11.5467	8.39571	7.36248	8.05479	7.23144	11.7561	11.3023	10.6817	8.7642	7.80539	6.51293	597	804	734	512	708	598	1003	1023	1010	752	577	494
ENSSSCG00000000062	chr5	6975844	6988366	-	CSDC2	100153407	ENSSSCT00000000068	GO:0003676(nucleic acid binding);GO:0003730(mRNA 3'-UTR binding);GO:0005737(cytoplasm);GO:0031090(organelle membrane);GO:0043488(regulation of mRNA stability)	NA	NA	NA	CSD	cold shock domain containing C2 [Source:VGNC Symbol;Acc:VGNC:87028]	protein_coding	4.18656	2.25367	1.41167	4.76015	3.04136	1.31698	3.13948	2.95667	3.10385	1.75043	2.39924	1.46693	529	272	214	573	462	189	464	463	508	260	307	193
ENSSSCG00000000063	chr5	6997939	7014421	+	POLR3H	100157033	ENSSSCT00000000069;ENSSSCT00000048703	GO:0000428(DNA-directed RNA polymerase complex);GO:0003677(DNA binding);GO:0003899(DNA-directed 5'-3' RNA polymerase activity);GO:0005634(nucleus);GO:0005654(nucleoplasm);GO:0005666(RNA polymerase III complex);GO:0005813(centrosome);GO:0006139(nucleobase-containing compound metabolic process);GO:0006351(DNA-templated transcription);GO:0006352(DNA-templated transcription initiation);GO:0006383(tra…	03020(RNA polymerase);04623(Cytosolic DNA-sensing pathway);04623(Cytosolic DNA-sensing pathway)	NA	NA	NA	RNA polymerase III subunit H [Source:VGNC Symbol;Acc:VGNC:91658]	protein_coding	3.60328	1.59159	1.53022	2.1482	2.3624	2.04886	2.61654	2.8628	2.5064	2.8205	2.32204	1.77726	758	320	386	430	598	488	643	746	683	698	495	388
ENSSSCG00000000064	chr5	7008719	7071025	-	ACO2	396999	ENSSSCT00000105482;ENSSSCT00000000070	GO:0003994(aconitate hydratase activity);GO:0005506(iron ion binding);GO:0005739(mitochondrion);GO:0005829(cytosol);GO:0006099(tricarboxylic acid cycle);GO:0006101(citrate metabolic process);GO:0016829(lyase activity);GO:0046872(metal ion binding);GO:0047780(citrate dehydratase activity);GO:0051536(iron-sulfur cluster binding);GO:0051539(4 iron, 4 sulfur cluster binding);GO:0051539(4 iron, 4 sulf…	00020(Citrate cycle (TCA cycle));00630(Glyoxylate and dicarboxylate metabolism);01100(Metabolic pathways);01200(Carbon metabolism);01210(2-Oxocarboxylic acid metabolism);01230(Biosynthesis of amino acids);01230(Biosynthesis of amino acids)	K01681	EC:4.2.1.3	NA	aconitase 2 [Source:VGNC Symbol;Acc:VGNC:97865]	protein_coding	65.5161	75.7589	79.1829	56.7565	59.2256	65.2548	73.389	80.4117	81.0948	55.0977	86.3645	72.7803	26697	29417	38603	22021	29028	30126	34940	40598	42782	26375	35629	30788
ENSSSCG00000000066	chr5	7253646	7277566	-	L3MBTL2	100157440	ENSSSCT00000072114;ENSSSCT00000078795	GO:0003682(chromatin binding);GO:0005634(nucleus);GO:0006325(chromatin organization);GO:0006355(regulation of DNA-templated transcription);GO:0008270(zinc ion binding);GO:0035064(methylated histone binding);GO:0042393(histone binding);GO:0045892(negative regulation of DNA-templated transcription);GO:0046872(metal ion binding);GO:0046872(metal ion binding)	NA	NA	NA	NA	L3MBTL histone methyl-lysine binding protein 2 [Source:VGNC Symbol;Acc:VGNC:89613]	protein_coding	2.42714	2.65985	2.71569	2.123	2.11944	2.90934	2.79507	3.2785	3.19312	2.76735	3.51177	2.81347	904	944	1209	753	949	1227	1216	1511	1538	1210	1323	1088
ENSSSCG00000000067	chr5	7248444	7253170	+	CHADL	102162247	ENSSSCT00000052716	GO:0002224(toll-like receptor signaling pathway);GO:0002376(immune system process);GO:0004888(transmembrane signaling receptor activity);GO:0005518(collagen binding);GO:0005615(extracellular space);GO:0006954(inflammatory response);GO:0006955(immune response);GO:0016021(integral component of membrane);GO:0030021(extracellular matrix structural constituent conferring compression resistance);GO:003…	NA	NA	NA	NA	chondroadherin like [Source:VGNC Symbol;Acc:VGNC:86622]	protein_coding	0.537508	0.257523	0.558848	0.233442	0.212807	0.448214	0.867743	0.195186	0.511357	0.587334	0.640071	0.455539	65	30	81	27	31	61	122	30	80	83	78	57
ENSSSCG00000000068	chr5	7311171	7393760	-	EP300	100156226	ENSSSCT00000026332	GO:0000122(negative regulation of transcription by RNA polymerase II);GO:0000123(histone acetyltransferase complex);GO:0001221(transcription coregulator binding);GO:0001223(transcription coactivator binding);GO:0001666(response to hypoxia);GO:0001756(somitogenesis);GO:0001966(thigmotaxis);GO:0002039(p53 binding);GO:0002209(behavioral defense response);GO:0003677(DNA binding);GO:0003682(chromatin …	04024(cAMP signaling pathway);04066(HIF-1 signaling pathway);04068(FoxO signaling pathway);04110(Cell cycle);04310(Wnt signaling pathway);04330(Notch signaling pathway);04350(TGF-beta signaling pathway);04520(Adherens junction);04630(JAK-STAT signaling pathway);04720(Long-term potentiation);04916(Melanogenesis);04919(Thyroid hormone signaling pathway);04922(Glucagon signaling pathway);04935(Growt…	K04498	EC:2.3.1.48	NA	E1A binding protein p300 [Source:VGNC Symbol;Acc:VGNC:87720]	protein_coding	8.32428	8.47447	8.11705	9.6175	9.4224	9.75552	7.95247	7.22844	7.74704	8.80801	6.72984	7.03062	3522	3417	4109	3875	4796	4677	3932	3790	4244	4378	2883	3089
ENSSSCG00000000071	chr5	7583048	7617762	+	ST13	100624451	ENSSSCT00000000077;ENSSSCT00000047691;ENSSSCT00000098740;ENSSSCT00000104502;ENSSSCT00000086118	GO:0005829(cytosol);GO:0009617(response to bacterium);GO:0030544(Hsp70 protein binding);GO:0046983(protein dimerization activity);GO:0051085(chaperone cofactor-dependent protein refolding);GO:0051085(chaperone cofactor-dependent protein refolding)	NA	NA	NA	NA	ST13 Hsp70 interacting protein [Source:HGNC Symbol;Acc:HGNC:11343]	protein_coding	56.8085	59.2559	48.6148	52.5966	56.0972	60.7582	56.2854	55.5225	59.434	59.6526	49.0279	66.9227	17144	17042	17553	15114	20363	20774	19846	20762	23221	21147	14981	20966
ENSSSCG00000000072	chr5	7622646	7670283	+	SLC25A17	100517713	ENSSSCT00000000078;ENSSSCT00000050054;ENSSSCT00000046906;ENSSSCT00000054524	GO:0005347(ATP transmembrane transporter activity);GO:0005777(peroxisome);GO:0005778(peroxisomal membrane);GO:0005779(integral component of peroxisomal membrane);GO:0006635(fatty acid beta-oxidation);GO:0015217(ADP transmembrane transporter activity);GO:0015228(coenzyme A transmembrane transporter activity);GO:0015230(FAD transmembrane transporter activity);GO:0015711(organic anion transport);GO:…	04146(Peroxisome);04146(Peroxisome)	NA	NA	NA	solute carrier family 25 member 17 [Source:VGNC Symbol;Acc:VGNC:92996]	protein_coding	93.907	89.6647	71.5345	69.7339	65.9207	79.7151	79.5923	79.5361	98.837	77.7109	112.473	94.9227	9196	8366	8380	6502	7765	8844	9105	9650	12529	8939	11150	9649
ENSSSCG00000000074	chr5	7735825	7738701	-	MCHR1	397295	ENSSSCT00000000080	GO:0004930(G protein-coupled receptor activity);GO:0005102(signaling receptor binding);GO:0005886(plasma membrane);GO:0005929(cilium);GO:0007165(signal transduction);GO:0007186(G protein-coupled receptor signaling pathway);GO:0007218(neuropeptide signaling pathway);GO:0016020(membrane);GO:0016021(integral component of membrane);GO:0030273(melanin-concentrating hormone receptor activity);GO:004300…	04080(Neuroactive ligand-receptor interaction)	NA	NA	NA	melanin concentrating hormone receptor 1 [Source:VGNC Symbol;Acc:VGNC:103300]	protein_coding	0.062638	0	0	0	0.110801	0.272019	0.100948	0.2326	0	0.058569	0.143483	0.157585	6	0	0	0	11	25	10	24	0	6	12	14
ENSSSCG00000000075	chr5	7959312	7972574	+	MRTFA	100516801	ENSSSCT00000000081	GO:0003713(transcription coactivator activity);GO:0003785(actin monomer binding);GO:0005634(nucleus);GO:0005654(nucleoplasm);GO:0005737(cytoplasm);GO:0005829(cytosol);GO:0010735(obsolete positive regulation of transcription via serum response element binding);GO:0045944(positive regulation of transcription by RNA polymerase II);GO:0051145(smooth muscle cell differentiation)	NA	NA	NA	NA	myocardin related transcription factor A [Source:VGNC Symbol;Acc:VGNC:96745]	protein_coding	6.03494	6.06953	6.12316	8.18409	8.55022	5.33906	6.96546	6.08861	6.7259	5.29975	5.35541	4.95355	740	709	898	955	1261	742	998	925	1067	763	665	631
ENSSSCG00000000076	chr5	7973082	8017768	-	SGSM3	100516266	ENSSSCT00000090408;ENSSSCT00000031184;ENSSSCT00000000082	GO:0005096(GTPase activator activity);GO:0005829(cytosol);GO:0005921(gap junction);GO:0031267(small GTPase binding);GO:0032483(regulation of Rab protein signal transduction);GO:0032486(Rap protein signal transduction);GO:0043547(positive regulation of GTPase activity);GO:0045732(positive regulation of protein catabolic process);GO:0048227(plasma membrane to endosome transport);GO:0090630(activati…	NA	NA	NA	NA	small G protein signaling modulator 3 [Source:VGNC Symbol;Acc:VGNC:92802]	protein_coding	4.40787	3.72181	4.00524	5.40815	4.45932	3.19311	4.1986	3.34577	3.08485	3.84449	3.12156	3.72664	1742	1401	1893	2035	2120	1430	1938	1638	1579	1784	1249	1528
ENSSSCG00000000077	chr5	8025508	8047603	-	ADSL	100170844	ENSSSCT00000000083;ENSSSCT00000078716;ENSSSCT00000071651;ENSSSCT00000093731	GO:0003824(catalytic activity);GO:0004018(N6-(1,2-dicarboxyethyl)AMP AMP-lyase (fumarate-forming) activity);GO:0005829(cytosol);GO:0006164(purine nucleotide biosynthetic process);GO:0006167(AMP biosynthetic process);GO:0006177(GMP biosynthetic process);GO:0006189('de novo' IMP biosynthetic process);GO:0009152(purine ribonucleotide biosynthetic process);GO:0009168(purine ribonucleoside monophospha…	00230(Purine metabolism);00250(Alanine, aspartate and glutamate metabolism);01100(Metabolic pathways);01240(Biosynthesis of cofactors);01240(Biosynthesis of cofactors)	K01756	EC:4.3.2.2	NA	adenylosuccinate lyase [Source:VGNC Symbol;Acc:VGNC:85160]	protein_coding	12.149	11.4468	9.85528	14.6543	13.0319	9.75035	9.6655	10.9012	12.0381	11.2228	10.5443	12.2469	2116	1900	2055	2430	2730	1923	1967	2353	2713	2296	1859	2214
ENSSSCG00000000078	chr5	8063985	8311429	-	TNRC6B	102159442	ENSSSCT00000073558;ENSSSCT00000038352	GO:0003676(nucleic acid binding);GO:0031047(gene silencing by RNA);GO:0035278(miRNA-mediated gene silencing by inhibition of translation);GO:0060213(positive regulation of nuclear-transcribed mRNA poly(A) tail shortening);GO:1900153(positive regulation of nuclear-transcribed mRNA catabolic process, deadenylation-dependent decay);GO:1900153(positive regulation of nuclear-transcribed mRNA catabolic…	NA	NA	NA	NA	trinucleotide repeat containing adaptor 6B [Source:VGNC Symbol;Acc:VGNC:94293]	protein_coding	2.19578	2.37155	1.44646	1.91514	1.71202	1.78691	2.17457	1.56563	1.93531	2.13124	1.51673	1.97881	705	725	556	585	661	650	815	623	804	803	493	660
ENSSSCG00000000079	chr5	8320978	8354723	-	FAM83F	100155438	ENSSSCT00000000085	GO:0007165(signal transduction);GO:0019901(protein kinase binding)	NA	NA	NA	NA	family with sequence similarity 83 member F [Source:VGNC Symbol;Acc:VGNC:87991]	protein_coding	0	0.00716689	0.326271	0.0369789	0.00985593	0	0.0128715	0	0	0.0281055	0.00726961	0.0194638	0	3	148	14	5	0	6	0	0	13	3	8
ENSSSCG00000000080	chr5	8375762	8445068	-	GRAP2	100516438	ENSSSCT00000000086	GO:0005634(nucleus);GO:0005654(nucleoplasm);GO:0005737(cytoplasm);GO:0005768(endosome);GO:0005829(cytosol);GO:0005886(plasma membrane)	04660(T cell receptor signaling pathway)	NA	NA	NA	GRB2 related adaptor protein 2 [Source:VGNC Symbol;Acc:VGNC:88660]	protein_coding	0.443741	0.095564	0.214769	0.208611	0.300854	0.176207	0	0.037409	0.465518	0.369593	0	0.408519	47	10	28	22	39	22	0	5	64	46	0	45
ENSSSCG00000000081	chr5	8447873	8552925	+	ENTHD1	100519254	ENSSSCT00000000087	GO:0005543(phospholipid binding);GO:0005768(endosome);GO:0005886(plasma membrane);GO:0006897(endocytosis);GO:0030125(clathrin vesicle coat);GO:0030276(clathrin binding)	NA	NA	NA	NA	ENTH domain containing 1 [Source:HGNC Symbol;Acc:HGNC:26352]	protein_coding	0	0.212562	0	0	0	0	0	0	0	0.029629	0	0	0	19	0	0	0	0	0	0	0	4	0	0
ENSSSCG00000000082	chr5	8595909	8701367	-	CACNA1I	100154640,150350	ENSSSCT00000102475;ENSSSCT00000000088;ENSSSCT00000106640;ENSSSCT00000103037;ENSSSCT00000099955	GO:0001518(voltage-gated sodium channel complex);GO:0005216(ion channel activity);GO:0005244(voltage-gated ion channel activity);GO:0005245(voltage-gated calcium channel activity);GO:0005248(voltage-gated sodium channel activity);GO:0005261(cation channel activity);GO:0005262(calcium channel activity);GO:0005886(plasma membrane);GO:0005891(voltage-gated calcium channel complex);GO:0006811(ion tra…	04010(MAPK signaling pathway);04020(Calcium signaling pathway);04713(Circadian entrainment);04925(Aldosterone synthesis and secretion);04927(Cortisol synthesis and secretion);04929(GnRH secretion);04934(Cushing syndrome);04934(Cushing syndrome)	NA	NA	NA	calcium voltage-gated channel subunit alpha1 I [Source:VGNC Symbol;Acc:VGNC:97908]	protein_coding	0.0455388	0	0.00712907	0	0.0190852	0.0274106	0.0247913	0.0136754	0.0293818	0.0568935	0.0128348	0.0161568	22	0	4	0	11	15	14	8	18	32	7	8
ENSSSCG00000000087	chr5	8826840	8852776	-	TAB1	100153785	ENSSSCT00000035948;ENSSSCT00000097715;ENSSSCT00000000093;ENSSSCT00000087726	GO:0001701(in utero embryonic development);GO:0003007(heart morphogenesis);GO:0003279(cardiac septum development);GO:0004722(protein serine/threonine phosphatase activity);GO:0005634(nucleus);GO:0005829(cytosol);GO:0006470(protein dephosphorylation);GO:0007179(transforming growth factor beta receptor signaling pathway);GO:0016301(kinase activity);GO:0016310(phosphorylation);GO:0016607(nuclear spe…	04010(MAPK signaling pathway);04064(NF-kappa B signaling pathway);04380(Osteoclast differentiation);04620(Toll-like receptor signaling pathway);04621(NOD-like receptor signaling pathway);04668(TNF signaling pathway);05132(Salmonella infection);05135(Yersinia infection);05140(Leishmaniasis);05145(Toxoplasmosis);05161(Hepatitis B);05168(Herpes simplex virus 1 infection);05169(Epstein-Barr virus inf…	NA	NA	NA	TGF-beta activated kinase 1 (MAP3K7) binding protein 1 [Source:NCBI gene (formerly Entrezgene);Acc:100153785]	protein_coding	19.665	20.0547	16.9945	14.6709	16.1707	16.9284	20.01	20.1893	21.6179	20.4097	20.1869	20.5111	2839	2759	2935	2016	2809	2769	3375	3611	4040	3461	2951	3074
ENSSSCG00000000091	chr5	9098654	9101037	-	ENSSSCG00000000091		ENSSSCT00000061182;ENSSSCT00000052388	GO:0003824(catalytic activity);GO:0008270(zinc ion binding);GO:0016020(membrane);GO:0016021(integral component of membrane);GO:0016787(hydrolase activity);GO:0046872(metal ion binding);GO:0046872(metal ion binding)	NA	NA	NA	NA		protein_coding	4.14085	6.05607	3.96076	4.61379	4.52761	3.86377	3.48815	4.65037	3.87179	3.73653	2.92289	2.36309	240	334	274	254	315	253	236	333	290	254	172	142
ENSSSCG00000000092	chr5	9207642	9230355	+	NPTXR	100521449	ENSSSCT00000000098	GO:0005615(extracellular space);GO:0005886(plasma membrane);GO:0007165(signal transduction);GO:0008029(pentraxin receptor activity);GO:0019903(protein phosphatase binding);GO:0031175(neuron projection development);GO:0042542(response to hydrogen peroxide);GO:0044877(protein-containing complex binding);GO:0098962(regulation of postsynaptic neurotransmitter receptor activity);GO:0098978(glutamaterg…	NA	NA	NA	NA	neuronal pentraxin receptor [Source:VGNC Symbol;Acc:VGNC:98158]	protein_coding	0.099113	0.222798	0.327176	0.25036	0.135675	0.208776	0.122049	0.092765	0.119796	0.109051	0.07012	0.274283	26	56	102	63	43	62	38	30	41	34	19	75
ENSSSCG00000000093	chr5	9236654	9248737	+	DNAL4	100520304	ENSSSCT00000054888	GO:0005737(cytoplasm);GO:0005856(cytoskeleton);GO:0005874(microtubule);GO:0005929(cilium);GO:0007017(microtubule-based process);GO:0030286(dynein complex);GO:0042802(identical protein binding);GO:0042995(cell projection);GO:0045505(dynein intermediate chain binding);GO:0051959(dynein light intermediate chain binding);GO:0110165(cellular anatomical entity)	05014(Amyotrophic lateral sclerosis);05016(Huntington disease);05022(Pathways of neurodegeneration - multiple diseases)	NA	NA	NA	dynein axonemal light chain 4 [Source:VGNC Symbol;Acc:VGNC:87374]	protein_coding	5.70268	7.5877	4.12616	9.14209	6.99183	5.9683	5.61479	5.80911	4.26287	5.79458	4.14944	6.49061	424	538	367	647	626	503	488	535	411	506	313	501
ENSSSCG00000000094	chr5	9273240	9293254	+	SUN2	100521622	ENSSSCT00000043063;ENSSSCT00000065525;ENSSSCT00000057414;ENSSSCT00000091655	GO:0000781(chromosome, telomeric region);GO:0000794(condensed nuclear chromosome);GO:0005634(nucleus);GO:0005635(nuclear envelope);GO:0005637(nuclear inner membrane);GO:0005639(integral component of nuclear inner membrane);GO:0016020(membrane);GO:0016021(integral component of membrane);GO:0021817(nucleokinesis involved in cell motility in cerebral cortex radial glia guided migration);GO:0030335(p…	NA	NA	NA	NA	Sad1 and UNC84 domain containing 2 [Source:VGNC Symbol;Acc:VGNC:93619]	protein_coding	30.9954	34.6274	28.6958	31.6685	30.6247	28.3577	26.9473	25.1003	25.4641	29.3178	21.8537	29.4101	6209	6610	6877	6040	7379	6437	6308	6231	6604	6900	4433	6116
ENSSSCG00000000095	chr5	9247203	9321899	-	GTPBP1	100520611	ENSSSCT00000062626;ENSSSCT00000000101;ENSSSCT00000029543;ENSSSCT00000060163	GO:0000166(nucleotide binding);GO:0003746(translation elongation factor activity);GO:0003924(GTPase activity);GO:0005525(GTP binding);GO:0006414(translational elongation);GO:0006414(translational elongation)	NA	NA	NA	NA	GTP binding protein 1 [Source:VGNC Symbol;Acc:VGNC:88742]	protein_coding	8.08189	7.88216	7.52411	10.1817	6.57631	7.39004	6.8556	6.08489	6.96073	7.68078	8.01056	6.44214	2224	2066	2477	2667	2176	2303	2204	2074	2480	2482	2231	1840
ENSSSCG00000000097	chr5	9336130	9350015	-	TOMM22	100520786	ENSSSCT00000075473	GO:0005739(mitochondrion);GO:0005741(mitochondrial outer membrane);GO:0005742(mitochondrial outer membrane translocase complex);GO:0006886(intracellular protein transport);GO:0015031(protein transport);GO:0016020(membrane);GO:0016021(integral component of membrane);GO:0045040(protein insertion into mitochondrial outer membrane)	NA	NA	NA	NA	translocase of outer mitochondrial membrane 22 [Source:HGNC Symbol;Acc:HGNC:18002]	protein_coding	18.6942	16.6508	13.9353	12.978	13.7521	16.5685	16.3973	18.953	19.3494	16.7065	18.5588	21.2384	2618	2222	2335	1731	2317	2629	2683	3289	3508	2748	2631	3088
ENSSSCG00000000103	chr5	9431229	9470113	+	DMC1	100522866,283987	ENSSSCT00000000109	GO:0000150(DNA strand exchange activity);GO:0000166(nucleotide binding);GO:0000730(DNA recombinase assembly);GO:0000781(chromosome, telomeric region);GO:0000794(condensed nuclear chromosome);GO:0001541(ovarian follicle development);GO:0001556(oocyte maturation);GO:0003677(DNA binding);GO:0003690(double-stranded DNA binding);GO:0003697(single-stranded DNA binding);GO:0005524(ATP binding);GO:000563…	NA	NA	NA	NA	DNA meiotic recombinase 1 [Source:VGNC Symbol;Acc:VGNC:87346]	protein_coding	0.0287046	0.169937	0.504754	0.114189	0.0357979	0.150939	0	0	0.169005	0.0546351	0	0.0206081	3	16	60	11	5	17	0	0	22	7	0	3
ENSSSCG00000000104	chr5	9485702	9505157	+	ENSSSCG00000000104		ENSSSCT00000054754;ENSSSCT00000000110	GO:0000166(nucleotide binding);GO:0003676(nucleic acid binding);GO:0003724(RNA helicase activity);GO:0004386(helicase activity);GO:0005524(ATP binding);GO:0016787(hydrolase activity);GO:0016787(hydrolase activity)	NA	K13178	EC:3.6.4.13	NA	DEAD-box helicase 17 [Source:VGNC Symbol;Acc:VGNC:103229]	protein_coding	115.753	151.372	85.9508	75.1658	81.5142	114.643	92.3035	96.5056	101.846	121.376	102.795	119.903	29079	36237	25833	17980	24631	32630	27092	30040	33125	35819	26145	31270
ENSSSCG00000000105	chr5	9505206	9515723	-	KDELR3	100514523	ENSSSCT00000000111;ENSSSCT00000074100	GO:0000139(Golgi membrane);GO:0005046(KDEL sequence binding);GO:0005783(endoplasmic reticulum);GO:0005789(endoplasmic reticulum membrane);GO:0005801(cis-Golgi network);GO:0006621(protein retention in ER lumen);GO:0006888(endoplasmic reticulum to Golgi vesicle-mediated transport);GO:0006890(retrograde vesicle-mediated transport, Golgi to endoplasmic reticulum);GO:0015031(protein transport);GO:0016…	NA	NA	NA	NA	KDEL endoplasmic reticulum protein retention receptor 3 [Source:VGNC Symbol;Acc:VGNC:89406]	protein_coding	17.0929	11.1233	26.408	18.1384	15.5177	14.4672	15.1937	20.628	15.9336	13.0572	15.532	15.1781	2019	1252	3731	2040	2204	1936	2097	3018	2436	1812	1857	1861
ENSSSCG00000000106	chr5	9547177	9548520	+	KCNJ4	100523060	ENSSSCT00000000112	GO:0005242(inward rectifier potassium channel activity);GO:0005244(voltage-gated ion channel activity);GO:0005886(plasma membrane);GO:0006811(ion transport);GO:0006813(potassium ion transport);GO:0016020(membrane);GO:0016021(integral component of membrane);GO:0016323(basolateral plasma membrane);GO:0030165(PDZ domain binding);GO:0034220(ion transmembrane transport);GO:0034765(regulation of ion tr…	04725(Cholinergic synapse);04921(Oxytocin signaling pathway)	NA	NA	NA	potassium inwardly rectifying channel subfamily J member 4 [Source:VGNC Symbol;Acc:VGNC:89358]	protein_coding	0.002707	0.03256	0.066489	0	0.094354	0	0	0	0	0	0	0	1	2	6	0	8	0	0	0	0	0	0	0
ENSSSCG00000000107	chr5	9594934	9620476	+	CSNK1E		ENSSSCT00000104986;ENSSSCT00000057608;ENSSSCT00000000113;ENSSSCT00000043044	GO:0000166(nucleotide binding);GO:0004672(protein kinase activity);GO:0004674(protein serine/threonine kinase activity);GO:0005524(ATP binding);GO:0005634(nucleus);GO:0005737(cytoplasm);GO:0006468(protein phosphorylation);GO:0008104(protein localization);GO:0016020(membrane);GO:0016021(integral component of membrane);GO:0018105(peptidyl-serine phosphorylation);GO:0030177(positive regulation of Wn…	04068(FoxO signaling pathway);04310(Wnt signaling pathway);04340(Hedgehog signaling pathway);04390(Hippo signaling pathway);04392(Hippo signaling pathway - multiple species);04710(Circadian rhythm);05010(Alzheimer disease);05022(Pathways of neurodegeneration - multiple diseases);05022(Pathways of neurodegeneration - multiple diseases)	K08960	EC:2.7.11.1	NA	casein kinase 1 epsilon [Source:HGNC Symbol;Acc:HGNC:2453]	protein_coding	10.2035	10.3301	6.98045	13.866	11.7696	9.07491	11.9285	10.1532	10.7274	10.8552	9.57103	9.49285	2253	2173	1844	2914	3124	2269	3076	2776	3066	2813	2139	2175
ENSSSCG00000000108	chr5	9633605	9682115	+	TMEM184B	100157699	ENSSSCT00000000114;ENSSSCT00000038876;ENSSSCT00000065929	GO:0016020(membrane);GO:0016021(integral component of membrane);GO:0110165(cellular anatomical entity);GO:0110165(cellular anatomical entity)	NA	NA	NA	NA	transmembrane protein 184B [Source:VGNC Symbol;Acc:VGNC:94120]	protein_coding	7.51015	5.46204	5.66937	10.1663	9.89881	7.55776	7.74451	7.27518	6.69573	7.03551	6.43407	5.51377	1887	1308	1704	2430	2990	2151	2273	2264	2178	2076	1636	1438
ENSSSCG00000000110	chr5	9713873	9777918	+	PLA2G6	100514711	ENSSSCT00000037007;ENSSSCT00000075325;ENSSSCT00000022302;ENSSSCT00000044457	GO:0003824(catalytic activity);GO:0004622(lysophospholipase activity);GO:0005615(extracellular space);GO:0005829(cytosol);GO:0006629(lipid metabolic process);GO:0016042(lipid catabolic process);GO:0016290(palmitoyl-CoA hydrolase activity);GO:0016787(hydrolase activity);GO:0017171(serine hydrolase activity);GO:0019731(antibacterial humoral response);GO:0032049(cardiolipin biosynthetic process);GO:…	00564(Glycerophospholipid metabolism);00565(Ether lipid metabolism);00590(Arachidonic acid metabolism);00591(Linoleic acid metabolism);00592(alpha-Linolenic acid metabolism);01100(Metabolic pathways);04014(Ras signaling pathway);04270(Vascular smooth muscle contraction);04666(Fc gamma R-mediated phagocytosis);04750(Inflammatory mediator regulation of TRP channels);04750(Inflammatory mediator regu…	K16343	EC:3.1.1.4	NA	phospholipase A2 group VI [Source:VGNC Symbol;Acc:VGNC:91500]	protein_coding	6.28757	9.2969	6.4654	3.89887	4.7199	7.29778	7.31482	7.88618	7.38898	4.75671	6.80334	6.54775	1104	1556	1358	653	997	1451	1500	1716	1679	981	1210	1194
ENSSSCG00000000111	chr5	9778727	9799703	+	BAIAP2L2	100515261	ENSSSCT00000000117;ENSSSCT00000087609	GO:0005543(phospholipid binding);GO:0005654(nucleoplasm);GO:0005829(cytosol);GO:0007009(plasma membrane organization);GO:0012506(vesicle membrane);GO:0030838(positive regulation of actin filament polymerization);GO:0044291(cell-cell contact zone);GO:0051017(actin filament bundle assembly);GO:0051764(actin crosslink formation);GO:0061024(membrane organization);GO:0071439(clathrin complex);GO:20002…	NA	NA	NA	NA	BAR/IMD domain containing adaptor protein 2 like 2 [Source:VGNC Symbol;Acc:VGNC:85750]	protein_coding	0.258532	0.0342666	0.0872537	0.0564376	0.262076	0	0	0.168811	0.0728846	0	0	0.146748	27	4	11	7	33	0	0	22	10	0	0	16
ENSSSCG00000000113	chr5	9800397	9806543	+	SLC16A8	100524435	ENSSSCT00000042449	GO:0005887(integral component of plasma membrane);GO:0008028(monocarboxylic acid transmembrane transporter activity);GO:0015129(lactate transmembrane transporter activity);GO:0015718(monocarboxylic acid transport);GO:0016020(membrane);GO:0016021(integral component of membrane);GO:0016323(basolateral plasma membrane);GO:0016324(apical plasma membrane);GO:0022857(transmembrane transporter activity)…	NA	NA	NA	NA	solute carrier family 16 member 8 [Source:VGNC Symbol;Acc:VGNC:92948]	protein_coding	0	0	0.162306	0.165805	0.063272	0	0.032941	0.069979	0.123959	0	0	0.081984	0	0	18	15	7	0	4	8	15	0	0	8
ENSSSCG00000000114	chr5	9808451	9825539	-	PICK1	100158107	ENSSSCT00000000120	GO:0003779(actin binding);GO:0005737(cytoplasm);GO:0005829(cytosol);GO:0005856(cytoskeleton);GO:0005886(plasma membrane);GO:0007205(protein kinase C-activating G protein-coupled receptor signaling pathway);GO:0008022(protein C-terminus binding);GO:0015844(monoamine transport);GO:0016020(membrane);GO:0019899(enzyme binding);GO:0019904(protein domain specific binding);GO:0042734(presynaptic membran…	NA	NA	NA	NA	protein interacting with PRKCA 1 [Source:VGNC Symbol;Acc:VGNC:91416]	protein_coding	8.84112	11.5559	8.33943	16.2486	16.0712	9.75468	9.09647	8.3077	9.1603	11.1976	10.944	9.55904	895	1114	1010	1565	1956	1118	1075	1042	1200	1331	1121	1004
ENSSSCG00000000116	chr5	9855983	9917726	-	POLR2F	100737214	ENSSSCT00000000122	GO:0000428(DNA-directed RNA polymerase complex);GO:0001650(fibrillar center);GO:0003677(DNA binding);GO:0003899(DNA-directed 5'-3' RNA polymerase activity);GO:0005634(nucleus);GO:0005654(nucleoplasm);GO:0005665(RNA polymerase II, core complex);GO:0005666(RNA polymerase III complex);GO:0005736(RNA polymerase I complex);GO:0006351(DNA-templated transcription);GO:0006366(transcription by RNA polymer…	03020(RNA polymerase);04623(Cytosolic DNA-sensing pathway);05016(Huntington disease)	NA	NA	NA	RNA polymerase II, I and III subunit F [Source:VGNC Symbol;Acc:VGNC:91650]	protein_coding	40.7365	35.2543	38.6767	33.3985	36.3408	32.1746	40.8481	42.2204	38.7861	43.5349	40.0451	42.9106	1316	1086	1495	1028	1412	1178	1542	1690	1622	1652	1310	1439
ENSSSCG00000000117	chr5	9917781	9924662	+	C22orf23		ENSSSCT00000091165;ENSSSCT00000088095	NA	NA	NA	NA	NA	chromosome 5 C22orf23 homolog [Source:VGNC Symbol;Acc:VGNC:86049]	protein_coding	1.21051	1.25496	3.04931	0.243316	1.01455	1.88152	2.5614	2.42371	1.18396	2.41546	2.39391	1.15685	87	86	263	17	88	153	215	216	110	204	174	87
ENSSSCG00000000118	chr5	9924652	9956946	-	MICALL1	100154036	ENSSSCT00000000124;ENSSSCT00000037890	GO:0005770(late endosome);GO:0006612(protein targeting to membrane);GO:0006897(endocytosis);GO:0006898(receptor-mediated endocytosis);GO:0016020(membrane);GO:0019898(extrinsic component of membrane);GO:0031175(neuron projection development);GO:0031267(small GTPase binding);GO:0032456(endocytic recycling);GO:0032458(slow endocytic recycling);GO:0036010(protein localization to endosome);GO:0042802(…	NA	NA	NA	NA	MICAL like 1 [Source:VGNC Symbol;Acc:VGNC:90209]	protein_coding	6.97526	7.1854	10.9488	5.15596	6.07138	7.83322	14.4117	14.9606	11.4068	11.5045	15.2562	6.28415	1806	1772	3390	1271	1891	2297	4358	4798	3822	3498	3998	1689
ENSSSCG00000000119	chr5	9968428	9996025	-	EIF3L	100515608	ENSSSCT00000076216;ENSSSCT00000036950;ENSSSCT00000077783;ENSSSCT00000046625	GO:0001650(fibrillar center);GO:0001732(formation of cytoplasmic translation initiation complex);GO:0002183(cytoplasmic translational initiation);GO:0003743(translation initiation factor activity);GO:0005654(nucleoplasm);GO:0005730(nucleolus);GO:0005737(cytoplasm);GO:0005852(eukaryotic translation initiation factor 3 complex);GO:0006412(translation);GO:0006413(translational initiation);GO:0016282…	NA	NA	NA	NA	eukaryotic translation initiation factor 3 subunit L [Source:VGNC Symbol;Acc:VGNC:87623]	protein_coding	44.1148	39.1305	43.152	46.6747	41.0081	32.8564	39.6022	36.0845	27.5914	55.9306	28.836	40.145	8645	7307	10118	8710	9666	7295	9067	8762	7001	12876	5722	8167
ENSSSCG00000000120	chr5	10004019	10017734	+	ANKRD54	100525518	ENSSSCT00000000126;ENSSSCT00000071715	GO:0005634(nucleus);GO:0005737(cytoplasm);GO:0006913(nucleocytoplasmic transport);GO:0016020(membrane);GO:0016021(integral component of membrane);GO:0019887(protein kinase regulator activity);GO:0030496(midbody);GO:0044877(protein-containing complex binding);GO:0045648(positive regulation of erythrocyte differentiation);GO:0045859(regulation of protein kinase activity);GO:1902531(regulation of in…	NA	NA	NA	NA	ankyrin repeat domain 54 [Source:VGNC Symbol;Acc:VGNC:85344]	protein_coding	8.23939	7.27793	6.58224	7.40438	7.46931	5.89718	8.09975	7.36584	5.90294	6.73625	5.94621	7.22706	756	637	723	647	824	613	869	837	701	726	553	689
ENSSSCG00000000121	chr5	10023746	10026120	-	GALR3	100623444	ENSSSCT00000000127	GO:0004930(G protein-coupled receptor activity);GO:0004966(galanin receptor activity);GO:0005887(integral component of plasma membrane);GO:0005929(cilium);GO:0007165(signal transduction);GO:0007186(G protein-coupled receptor signaling pathway);GO:0007187(G protein-coupled receptor signaling pathway, coupled to cyclic nucleotide second messenger);GO:0007188(adenylate cyclase-modulating G protein-c…	04080(Neuroactive ligand-receptor interaction)	NA	NA	NA	galanin receptor 3 [Source:VGNC Symbol;Acc:VGNC:88341]	protein_coding	0.77652	0.532239	1.09207	0	0	0.310753	0.552223	0.355577	0.283416	0.310727	0	0.457482	65	43	110	0	0	30	54	37	31	31	0	40
ENSSSCG00000000130	chr5	10489289	10521735	-	CYTH4	100240722	ENSSSCT00000000136	GO:0005085(guanyl-nucleotide exchange factor activity);GO:0005829(cytosol);GO:0005886(plasma membrane);GO:0032012(regulation of ARF protein signal transduction);GO:0034451(centriolar satellite);GO:0045171(intercellular bridge);GO:0050790(regulation of catalytic activity)	04072(Phospholipase D signaling pathway);04144(Endocytosis);05132(Salmonella infection)	NA	NA	NA	cytohesin 4 [Source:VGNC Symbol;Acc:VGNC:87137]	protein_coding	4.7972	2.611	2.40163	3.90556	4.06211	2.7203	2.83672	1.89612	2.45032	2.58926	0.736124	2.34669	743	386	445	576	757	478	514	364	492	471	116	378
ENSSSCG00000000131	chr5	10427019	10429478	+	ELFN2	100511563	ENSSSCT00000000137	GO:0005615(extracellular space);GO:0016020(membrane);GO:0016021(integral component of membrane);GO:0031012(extracellular matrix)	NA	NA	NA	NA	extracellular leucine rich repeat and fibronectin type III domain containing 2 [Source:VGNC Symbol;Acc:VGNC:103232]	protein_coding	0	0	0.014169	0.080413	0.069616	0	0	0	0	0	0	0	0	0	2	9	10	0	0	0	0	0	0	0
ENSSSCG00000000132	chr5	10764497	10776172	+	TEX33	100152026	ENSSSCT00000062116;ENSSSCT00000000138	NA	NA	NA	NA	NA	testis expressed 33 [Source:VGNC Symbol;Acc:VGNC:93899]	protein_coding	0	0	0.926398	6.19693	4.30776	1.39772	0.07746	0.154739	0.0987268	0.697761	0.256735	0	0	0	69	367	323	99	6	12	8	51	17	0
ENSSSCG00000000133	chr5	10746890	10759622	+	TST	100153230,100131187	ENSSSCT00000000139	GO:0004792(thiosulfate sulfurtransferase activity);GO:0005739(mitochondrion);GO:0008097(5S rRNA binding);GO:0016740(transferase activity);GO:0016783(sulfurtransferase activity);GO:0019346(transsulfuration);GO:0030855(epithelial cell differentiation);GO:0035928(rRNA import into mitochondrion);GO:0051029(rRNA transport)	00270(Cysteine and methionine metabolism);00920(Sulfur metabolism);01100(Metabolic pathways);04122(Sulfur relay system)	K01011	EC:2.8.1.1;EC:2.8.1.2	NA	thiosulfate sulfurtransferase [Source:VGNC Symbol;Acc:VGNC:94529]	protein_coding	57.8704	65.0348	97.6201	206.295	188.635	99.5787	78.2916	90.9276	91.8431	100.946	66.919	127.72	4348	4657	8775	14758	17047	8477	6873	8465	8934	8910	5091	9962
ENSSSCG00000000135	chr5	10707354	10718959	-	KCTD17	100512279	ENSSSCT00000000141;ENSSSCT00000106499;ENSSSCT00000075425	GO:0005737(cytoplasm);GO:0005783(endoplasmic reticulum);GO:0031463(Cul3-RING ubiquitin ligase complex);GO:0032469(endoplasmic reticulum calcium ion homeostasis);GO:0042802(identical protein binding);GO:0043161(proteasome-mediated ubiquitin-dependent protein catabolic process);GO:0045724(positive regulation of cilium assembly);GO:0051260(protein homooligomerization);GO:0097602(cullin family protei…	NA	NA	NA	NA	potassium channel tetramerization domain containing 17 [Source:VGNC Symbol;Acc:VGNC:89396]	protein_coding	16.4611	21.7396	12.7369	11.7909	11.9935	9.7057	8.48854	8.14221	7.07106	10.4838	12.8506	14.6662	2396	3014	2217	1634	2100	1600	1443	1469	1332	1792	1893	2215
ENSSSCG00000000136	chr5	10816376	10840618	-	CSF2RB	100153254	ENSSSCT00000000142;ENSSSCT00000085649	GO:0004896(cytokine receptor activity);GO:0006468(protein phosphorylation);GO:0007259(receptor signaling pathway via JAK-STAT);GO:0009897(external side of plasma membrane);GO:0016020(membrane);GO:0016021(integral component of membrane);GO:0016064(immunoglobulin mediated immune response);GO:0019221(cytokine-mediated signaling pathway);GO:0030526(granulocyte macrophage colony-stimulating factor rec…	04060(Cytokine-cytokine receptor interaction);04210(Apoptosis);04630(JAK-STAT signaling pathway);05200(Pathways in cancer);05200(Pathways in cancer)	NA	NA	NA	colony stimulating factor 2 receptor subunit beta [Source:VGNC Symbol;Acc:VGNC:87033]	protein_coding	1.82623	0.583056	1.04856	2.61115	2.19017	1.5181	0.449645	0.673087	0.670558	0.974381	0.346324	0.321221	455	139	313	619	656	428	131	208	217	285	88	83
ENSSSCG00000000137	chr5	10874953	10994014	-	NCF4	100152055	ENSSSCT00000105262;ENSSSCT00000075176;ENSSSCT00000083107;ENSSSCT00000087050;ENSSSCT00000081184;ENSSSCT00000089031;ENSSSCT00000034941	GO:0005737(cytoplasm);GO:0005829(cytosol);GO:0006909(phagocytosis);GO:0010008(endosome membrane);GO:0016020(membrane);GO:0016176(superoxide-generating NADPH oxidase activator activity);GO:0032266(phosphatidylinositol-3-phosphate binding);GO:0035091(phosphatidylinositol binding);GO:0042554(superoxide anion generation);GO:0043020(NADPH oxidase complex);GO:0045730(respiratory burst);GO:0050790(regul…	04145(Phagosome);04380(Osteoclast differentiation);04670(Leukocyte transendothelial migration);05020(Prion disease);05140(Leishmaniasis);05140(Leishmaniasis)	NA	NA	NA	neutrophil cytosolic factor 4 [Source:VGNC Symbol;Acc:VGNC:90608]	protein_coding	1.04952	0.774213	0.603352	3.47558	2.49187	1.10932	0.494308	0.53735	0.585858	0.775695	0.438192	0.616963	313	221	216	981	889	372	173	201	225	270	132	190
ENSSSCG00000000138	chr5	10955491	10973289	+	PVALB	100157265,4151	ENSSSCT00000063832	GO:0005509(calcium ion binding);GO:0005634(nucleus);GO:0005737(cytoplasm);GO:0010467(gene expression);GO:0030424(axon);GO:0045202(synapse);GO:0046872(metal ion binding);GO:0098976(excitatory chemical synaptic transmission);GO:0098977(inhibitory chemical synaptic transmission)	NA	NA	NA	NA	parvalbumin [Source:VGNC Symbol;Acc:VGNC:92007]	protein_coding	0.083383	0	0	0	0	0	0.502535	0.545845	0	0	0	0	3	0	0	0	0	0	21	24	0	0	0	0
ENSSSCG00000000139	chr5	11000412	11017950	+	IFT27	100517032	ENSSSCT00000086974	GO:0000139(Golgi membrane);GO:0001822(kidney development);GO:0003924(GTPase activity);GO:0005525(GTP binding);GO:0005634(nucleus);GO:0005737(cytoplasm);GO:0005794(Golgi apparatus);GO:0005813(centrosome);GO:0005929(cilium);GO:0006886(intracellular protein transport);GO:0007224(smoothened signaling pathway);GO:0007283(spermatogenesis);GO:0016020(membrane);GO:0030992(intraciliary transport particle …	NA	NA	NA	NA	intraflagellar transport 27 [Source:VGNC Symbol;Acc:VGNC:98043]	protein_coding	2.07321	2.05418	2.6479	0.785684	1.0762	1.60884	2.17009	1.42906	1.95019	2.03092	2.07739	2.06609	318	300	485	115	199	279	388	271	387	365	322	329
ENSSSCG00000000141	chr5	11213312	11229158	+	EIF3D	100512835	ENSSSCT00000000147	GO:0001732(formation of cytoplasmic translation initiation complex);GO:0002183(cytoplasmic translational initiation);GO:0002191(cap-dependent translational initiation);GO:0003723(RNA binding);GO:0003743(translation initiation factor activity);GO:0005737(cytoplasm);GO:0005852(eukaryotic translation initiation factor 3 complex);GO:0006412(translation);GO:0006413(translational initiation);GO:0016282…	03013(RNA transport)	NA	NA	NA	eukaryotic translation initiation factor 3 subunit D [Source:VGNC Symbol;Acc:VGNC:87616]	protein_coding	85.9101	71.2066	80.7662	77.1062	72.0676	62.8503	73.4316	69.1083	71.9271	82.5503	56.2898	74.9832	9275	7326	10432	7926	9358	7688	9263	9244	10053	10469	6153	8404
ENSSSCG00000000142	chr5	11233902	11254064	+	FOXRED2	100513010	ENSSSCT00000057822	GO:0005788(endoplasmic reticulum lumen);GO:0030433(ubiquitin-dependent ERAD pathway);GO:0050660(flavin adenine dinucleotide binding)	NA	NA	NA	NA	FAD dependent oxidoreductase domain containing 2 [Source:VGNC Symbol;Acc:VGNC:88229]	protein_coding	1.00106	0.843353	1.00417	1.02841	1.21065	1.5958	1.27333	1.62847	0.982924	1.58875	0.675006	0.944115	256	206	307	250	372	462	380	515	325	477	175	251
ENSSSCG00000000144	chr5	11264645	11283395	+	TXN2	100158080	ENSSSCT00000104985;ENSSSCT00000092374	GO:0005515(protein binding);GO:0005739(mitochondrion);GO:0015035(protein-disulfide reductase activity);GO:0045454(cell redox homeostasis);GO:0045454(cell redox homeostasis)	04621(NOD-like receptor signaling pathway);05012(Parkinson disease);05132(Salmonella infection);05418(Fluid shear stress and atherosclerosis);05418(Fluid shear stress and atherosclerosis)	NA	NA	NA	thioredoxin 2 [Source:VGNC Symbol;Acc:VGNC:94602]	protein_coding	11.481	12.2379	11.0067	8.12523	8.11852	10.5646	8.81555	10.2668	12.7777	9.63554	14.2393	11.5423	4029	4093	4622	2715	3427	4202	3615	4465	5806	3974	5060	4205
ENSSSCG00000000145	chr5	11360660	11456472	+	MYH9	396904	ENSSSCT00000071268;ENSSSCT00000024385;ENSSSCT00000099733;ENSSSCT00000092861	GO:0000146(microfilament motor activity);GO:0000166(nucleotide binding);GO:0000212(meiotic spindle organization);GO:0000904(cell morphogenesis involved in differentiation);GO:0001525(angiogenesis);GO:0001701(in utero embryonic development);GO:0001725(stress fiber);GO:0001726(ruffle);GO:0001768(establishment of T cell polarity);GO:0001772(immunological synapse);GO:0001778(plasma membrane repair);G…	04270(Vascular smooth muscle contraction);04530(Tight junction);04810(Regulation of actin cytoskeleton);04810(Regulation of actin cytoskeleton)	NA	NA	NA	myosin heavy chain 9 [Source:VGNC Symbol;Acc:VGNC:90512]	protein_coding	60.5873	57.9339	37.8812	56.8187	60.6729	63.1219	71.3112	53.4931	43.8061	57.425	64.4629	46.2883	25950	23646	19413	23173	31257	30631	35687	28389	24292	28893	27954	20582
ENSSSCG00000000146	chr3	7002735	7143095	+	MYH11	100627924	ENSSSCT00000057164;ENSSSCT00000082612;ENSSSCT00000101264;ENSSSCT00000054316;ENSSSCT00000000153	GO:0000166(nucleotide binding);GO:0003774(cytoskeletal motor activity);GO:0003779(actin binding);GO:0005524(ATP binding);GO:0008307(structural constituent of muscle);GO:0016459(myosin complex);GO:0048251(elastic fiber assembly);GO:0051015(actin filament binding);GO:0055013(cardiac muscle cell development);GO:0055013(cardiac muscle cell development)	04270(Vascular smooth muscle contraction);04530(Tight junction);04810(Regulation of actin cytoskeleton);04810(Regulation of actin cytoskeleton)	NA	NA	NA	myosin heavy chain 11 [Source:VGNC Symbol;Acc:VGNC:90510]	protein_coding	78.207	29.2284	14.4523	18.4155	18.2785	16.6955	15.9436	23.1101	15.0802	7.68084	38.246	10.5474	31028	11052	6861	6959	8725	7505	7392	11361	7746	3581	15363	4347
ENSSSCG00000000148	chr5	11509987	11523347	-	ENSSSCG00000000148		ENSSSCT00000050902;ENSSSCT00000054045	GO:0005576(extracellular region);GO:0005615(extracellular space);GO:0006869(lipid transport);GO:0008289(lipid binding);GO:0016020(membrane);GO:0016021(integral component of membrane);GO:0042157(lipoprotein metabolic process);GO:0042157(lipoprotein metabolic process)	NA	NA	NA	NA		protein_coding	5.4635	9.1215	1.92775	3.13839	2.47847	2.23431	2.28671	2.82094	2.19606	2.70085	1.54362	2.29702	470	748	199	257	257	218	230	301	245	273	135	205
ENSSSCG00000000151	chr5	11919658	11929178	-	ENSSSCG00000000151		ENSSSCT00000043062	GO:0005576(extracellular region);GO:0006869(lipid transport);GO:0008289(lipid binding);GO:0042157(lipoprotein metabolic process)	NA	NA	NA	NA		protein_coding	25.369	22.5743	24.0243	12.228	13.4744	18.0588	19.2146	22.8203	17.9412	19.0574	30.8959	21.2247	3050	2586	3455	1400	1949	2460	2699	3399	2792	2691	3760	2649
ENSSSCG00000000152	chr5	11633541	11903094	+	RBFOX2	100513594	ENSSSCT00000045134;ENSSSCT00000044408;ENSSSCT00000054319;ENSSSCT00000052275;ENSSSCT00000000160;ENSSSCT00000053162	GO:0000381(regulation of alternative mRNA splicing, via spliceosome);GO:0003676(nucleic acid binding);GO:0003723(RNA binding);GO:0003729(mRNA binding);GO:0005634(nucleus);GO:0005737(cytoplasm);GO:0006397(mRNA processing);GO:0007399(nervous system development);GO:0008380(RNA splicing);GO:0010724(regulation of definitive erythrocyte differentiation);GO:0021942(radial glia guided migration of Purkin…	NA	NA	NA	NA	RNA binding fox-1 homolog 2 [Source:VGNC Symbol;Acc:VGNC:92140]	protein_coding	7.91934	7.23763	8.76944	8.17101	7.81623	6.27245	7.19138	8.83188	7.68104	6.88775	8.46227	7.90386	2220	1933	2941	2182	2636	1993	2354	3068	2788	2269	2402	2301
ENSSSCG00000000156	chr5	12505654	12526232	-	FBXO7	100155281	ENSSSCT00000093020;ENSSSCT00000000164	GO:0000151(ubiquitin ligase complex);GO:0000422(autophagy of mitochondrion);GO:0005634(nucleus);GO:0005654(nucleoplasm);GO:0005737(cytoplasm);GO:0005739(mitochondrion);GO:0005829(cytosol);GO:0006511(ubiquitin-dependent protein catabolic process);GO:0006626(protein targeting to mitochondrion);GO:0010975(regulation of neuron projection development);GO:0016567(protein ubiquitination);GO:0019005(SCF …	NA	NA	NA	NA	F-box protein 7 [Source:VGNC Symbol;Acc:VGNC:88053]	protein_coding	17.2373	18.7898	15.0686	25.0008	21.7288	14.7327	15.6164	15.9575	12.2014	18.5002	12.4357	13.994	1920	1995	2008	2652	2911	1859	2033	2202	1760	2420	1402	1618
ENSSSCG00000000157	chr5	12542266	12578954	+	BPIFC	100519483	ENSSSCT00000036153	GO:0005615(extracellular space);GO:0008289(lipid binding)	NA	NA	NA	NA	BPI fold containing family C [Source:VGNC Symbol;Acc:VGNC:85865]	protein_coding	0.405838	0.352795	0.11427	0.513895	0.646342	1.03249	0.528505	0.420065	0.242958	0.773783	0.393349	0.966018	38	32	13	46	73	109	58	49	30	85	38	94
ENSSSCG00000000158	chr5	12580294	12613852	+	RTCB	733658	ENSSSCT00000000167	GO:0000166(nucleotide binding);GO:0000971(tRNA exon ligation utilizing 2',3' cyclic phosphate of 5'-exon as source of linkage phosphate);GO:0001701(in utero embryonic development);GO:0001890(placenta development);GO:0003972(RNA ligase (ATP) activity);GO:0005525(GTP binding);GO:0005634(nucleus);GO:0005635(nuclear envelope);GO:0005654(nucleoplasm);GO:0005737(cytoplasm);GO:0005789(endoplasmic reticu…	NA	K14415	EC:6.5.1.8	NA	RNA 2',3'-cyclic phosphate and 5'-OH ligase [Source:VGNC Symbol;Acc:VGNC:92492]	protein_coding	8.51507	7.30626	11.2182	8.42086	8.97485	10.7214	10.0647	11.0743	8.73674	7.04061	10.1968	8.42702	2473	2022	3897	2328	3135	3527	3415	3984	3284	2402	2998	2540
ENSSSCG00000000160	chr5	12638514	12668886	+	PRDM4	100155716	ENSSSCT00000047006	GO:0000978(RNA polymerase II cis-regulatory region sequence-specific DNA binding);GO:0001228(DNA-binding transcription activator activity, RNA polymerase II-specific);GO:0003677(DNA binding);GO:0005634(nucleus);GO:0005737(cytoplasm);GO:0006366(transcription by RNA polymerase II);GO:0008168(methyltransferase activity);GO:0032259(methylation);GO:0035097(histone methyltransferase complex);GO:0045944…	04722(Neurotrophin signaling pathway)	NA	NA	zf-C2H2	PR/SET domain 4 [Source:VGNC Symbol;Acc:VGNC:91779]	protein_coding	5.52456	4.60099	4.55846	5.70065	4.97137	3.89024	4.17437	4.83486	4.14407	3.63693	2.89497	4.10434	1098	871	1084	1079	1188	876	969	1190	1066	849	583	847
ENSSSCG00000000161	chr5	12701589	12730849	-	PWP1	100519838	ENSSSCT00000000170	GO:0005634(nucleus);GO:0005730(nucleolus);GO:0005794(Golgi apparatus);GO:0006364(rRNA processing);GO:0033140(negative regulation of peptidyl-serine phosphorylation of STAT protein);GO:0034773(histone H4-K20 trimethylation);GO:1901838(positive regulation of transcription of nucleolar large rRNA by RNA polymerase I);GO:1990889(H4K20me3 modified histone binding);GO:2000738(positive regulation of ste…	NA	NA	NA	NA	PWP1 homolog, endonuclein [Source:VGNC Symbol;Acc:VGNC:92009]	protein_coding	8.1252	6.37346	8.73773	9.08736	9.99408	9.07536	10.3904	10.8009	8.3892	7.20343	8.6411	8.97561	1293	967	1664	1377	1913	1637	1932	2130	1729	1347	1393	1483
ENSSSCG00000000162	chr5	12754539	13069527	-	BTBD11	100520194	ENSSSCT00000000171	GO:0046982(protein heterodimerization activity);GO:0060395(SMAD protein signal transduction)	NA	NA	NA	NA	BTB domain containing 11 [Source:VGNC Symbol;Acc:VGNC:85901]	protein_coding	0.440735	0.282405	0.257382	0.396176	0.416465	0.149678	0.29779	0.125313	0.164847	0.140931	0.093955	0.207778	124	76	87	107	141	48	98	44	61	47	27	61
ENSSSCG00000000164	chr5	13275545	13364593	+	CRY1	100520380	ENSSSCT00000064675	GO:0000122(negative regulation of transcription by RNA polymerase II);GO:0003690(double-stranded DNA binding);GO:0005634(nucleus);GO:0005739(mitochondrion);GO:0006094(gluconeogenesis);GO:0006975(DNA damage induced protein phosphorylation);GO:0007623(circadian rhythm);GO:0009416(response to light stimulus);GO:0009881(photoreceptor activity);GO:0014823(response to activity);GO:0016922(nuclear recep…	04710(Circadian rhythm)	NA	NA	NA	cryptochrome circadian regulator 1 [Source:VGNC Symbol;Acc:VGNC:87011]	protein_coding	3.83512	2.95145	4.00469	4.41132	4.25561	4.89769	6.43634	7.82184	7.60642	3.27071	2.78292	4.03053	696	511	870	763	929	1007	1365	1759	1788	698	512	760
ENSSSCG00000000167	chr5	13468937	13580114	-	RIC8B	100154459	ENSSSCT00000084155;ENSSSCT00000055709;ENSSSCT00000060459;ENSSSCT00000047620;ENSSSCT00000000176;ENSSSCT00000053958	GO:0001965(G-protein alpha-subunit binding);GO:0005085(guanyl-nucleotide exchange factor activity);GO:0005737(cytoplasm);GO:0005813(centrosome);GO:0005829(cytosol);GO:0005886(plasma membrane);GO:0007186(G protein-coupled receptor signaling pathway);GO:0050790(regulation of catalytic activity);GO:0050790(regulation of catalytic activity)	NA	NA	NA	NA	RIC8 guanine nucleotide exchange factor B [Source:VGNC Symbol;Acc:VGNC:92302]	protein_coding	4.14101	3.502	4.25297	3.89247	4.00493	3.91727	3.78192	3.71985	3.27826	3.0972	2.64217	4.39587	1434	1155	1761	1284	1666	1537	1530	1596	1469	1260	928	1580
ENSSSCG00000000171	chr5	14021131	14030039	+	CKAP4	100523493	ENSSSCT00000000180	GO:0005783(endoplasmic reticulum);GO:0005791(rough endoplasmic reticulum);GO:0005811(lipid droplet);GO:0016020(membrane);GO:0016021(integral component of membrane)	04141(Protein processing in endoplasmic reticulum)	NA	NA	NA	cytoskeleton associated protein 4 [Source:VGNC Symbol;Acc:VGNC:86716]	protein_coding	7.50438	5.23637	15.0133	7.71606	7.08122	7.27337	11.8373	14.5567	10.6173	7.43104	10.6644	8.86858	704	468	1685	689	799	773	1297	1692	1289	819	1013	864
ENSSSCG00000000174	chr5	14811995	14834106	+	TEX49		ENSSSCT00000043095	NA	NA	NA	NA	NA	testis expressed 49 [Source:HGNC Symbol;Acc:HGNC:48628]	protein_coding	0.036437	0.107128	0.252833	0.314387	0.36404	0.165236	0.078771	0	0.262754	0.18049	0	0.317706	2	5	13	13	19	8	4	0	15	10	0	14
ENSSSCG00000000175	chr5	14834426	14850728	-	ADCY6	100522613	ENSSSCT00000000184	GO:0000166(nucleotide binding);GO:0004016(adenylate cyclase activity);GO:0005080(protein kinase C binding);GO:0005524(ATP binding);GO:0005886(plasma membrane);GO:0005887(integral component of plasma membrane);GO:0006171(cAMP biosynthetic process);GO:0007189(adenylate cyclase-activating G protein-coupled receptor signaling pathway);GO:0007193(adenylate cyclase-inhibiting G protein-coupled receptor…	00230(Purine metabolism);01100(Metabolic pathways);01522(Endocrine resistance);04015(Rap1 signaling pathway);04022(cGMP-PKG signaling pathway);04024(cAMP signaling pathway);04062(Chemokine signaling pathway);04072(Phospholipase D signaling pathway);04114(Oocyte meiosis);04211(Longevity regulating pathway);04213(Longevity regulating pathway - multiple species);04261(Adrenergic signaling in cardiom…	K08046	EC:4.6.1.1	NA	adenylate cyclase 6 [Source:VGNC Symbol;Acc:VGNC:85110]	protein_coding	33.368	34.5681	25.4549	28.7478	29.163	27.3955	23.7153	20.9591	24.1009	23.0221	16.3159	32.5185	9333	9214	8518	7657	9812	8682	7751	7264	8728	7565	4621	9443
ENSSSCG00000000176	chr5	14888958	14899174	-	DDX23	100737526	ENSSSCT00000000185;ENSSSCT00000085859	GO:0000166(nucleotide binding);GO:0000785(chromatin);GO:0003676(nucleic acid binding);GO:0003724(RNA helicase activity);GO:0004386(helicase activity);GO:0005524(ATP binding);GO:0005634(nucleus);GO:0005654(nucleoplasm);GO:0005682(U5 snRNP);GO:0005730(nucleolus);GO:0005891(voltage-gated calcium channel complex);GO:0007268(chemical synaptic transmission);GO:0007528(neuromuscular junction development…	03040(Spliceosome);03040(Spliceosome)	K12858	EC:3.6.4.13	NA	DEAD-box helicase 23 [Source:VGNC Symbol;Acc:VGNC:103230]	protein_coding	14.2151	11.7621	12.4771	12.0949	11.5178	12.27	17.0685	16.3328	11.4767	12.4457	11.6392	11.2056	2138	1687	2246	1733	2083	2091	2999	3043	2235	2199	1773	1750
ENSSSCG00000000179	chr5	14950492	14959327	+	CCDC65	100525107	ENSSSCT00000000188	GO:0003352(regulation of cilium movement);GO:0005858(axonemal dynein complex);GO:0005930(axoneme);GO:0031514(motile cilium);GO:0036064(ciliary basal body);GO:0042995(cell projection);GO:0060271(cilium assembly);GO:0060285(cilium-dependent cell motility);GO:0070286(axonemal dynein complex assembly)	NA	NA	NA	NA	coiled-coil domain containing 65 [Source:VGNC Symbol;Acc:VGNC:86306]	protein_coding	1.04933	0.969141	0.739513	1.29995	1.59342	0.705012	0.59041	0.219807	0.385763	0.57199	0.552741	0.578669	108	95	91	128	198	83	71	28	52	70	58	62
ENSSSCG00000000182	chr5	14997381	15003567	-	WNT10B	100126276	ENSSSCT00000000191;ENSSSCT00000044121	GO:0000086(G2/M transition of mitotic cell cycle);GO:0000122(negative regulation of transcription by RNA polymerase II);GO:0001649(osteoblast differentiation);GO:0002062(chondrocyte differentiation);GO:0005102(signaling receptor binding);GO:0005109(frizzled binding);GO:0005125(cytokine activity);GO:0005576(extracellular region);GO:0005615(extracellular space);GO:0006357(regulation of transcriptio…	04150(mTOR signaling pathway);04310(Wnt signaling pathway);04390(Hippo signaling pathway);04550(Signaling pathways regulating pluripotency of stem cells);04916(Melanogenesis);04934(Cushing syndrome);05010(Alzheimer disease);05022(Pathways of neurodegeneration - multiple diseases);05165(Human papillomavirus infection);05200(Pathways in cancer);05205(Proteoglycans in cancer);05217(Basal cell carcin…	NA	NA	NA	Wnt family member 10B [Source:VGNC Symbol;Acc:VGNC:94965]	protein_coding	0.442388	0.0657724	0.48221	0.280843	0.470938	0.483459	0.0749818	0.264125	0.444151	0.150156	0	0.144313	51	8	66	31	65	63	10	38	66	21	0	17
ENSSSCG00000000183	chr5	15010786	15014998	+	WNT1	100525462	ENSSSCT00000000192	GO:0000578(embryonic axis specification);GO:0001658(branching involved in ureteric bud morphogenesis);GO:0001934(positive regulation of protein phosphorylation);GO:0005102(signaling receptor binding);GO:0005109(frizzled binding);GO:0005125(cytokine activity);GO:0005576(extracellular region);GO:0005615(extracellular space);GO:0005737(cytoplasm);GO:0007267(cell-cell signaling);GO:0007520(myoblast f…	04150(mTOR signaling pathway);04310(Wnt signaling pathway);04390(Hippo signaling pathway);04550(Signaling pathways regulating pluripotency of stem cells);04916(Melanogenesis);04934(Cushing syndrome);05010(Alzheimer disease);05022(Pathways of neurodegeneration - multiple diseases);05165(Human papillomavirus infection);05200(Pathways in cancer);05205(Proteoglycans in cancer);05217(Basal cell carcin…	NA	NA	NA	Wnt family member 1 [Source:HGNC Symbol;Acc:HGNC:12774]	protein_coding	0.072808	0	0	0	0	0	0	0.029381	0	0	0	0.023064	8	0	0	0	0	0	0	4	0	0	0	3
ENSSSCG00000000184	chr5	15026080	15029632	-	DDN	100525642	ENSSSCT00000000194	GO:0005634(nucleus);GO:0005737(cytoplasm);GO:0005886(plasma membrane);GO:0042995(cell projection)	NA	NA	NA	NA	dendrin [Source:VGNC Symbol;Acc:VGNC:87210]	protein_coding	0	0	0	0.055685	0.042232	0.023399	0	0	0	0.022113	0	0	0	0	0	8	8	4	0	0	0	4	0	0
ENSSSCG00000000185	chr5	15033058	15049735	-	PRKAG1	414426	ENSSSCT00000000195;ENSSSCT00000061630	GO:0004672(protein kinase activity);GO:0005634(nucleus);GO:0006468(protein phosphorylation);GO:0010628(positive regulation of gene expression);GO:0019901(protein kinase binding);GO:0031588(nucleotide-activated protein kinase complex);GO:0031669(cellular response to nutrient levels);GO:0032559(adenyl ribonucleotide binding);GO:0051170(import into nucleus);GO:0071900(regulation of protein serine/th…	04068(FoxO signaling pathway);04152(AMPK signaling pathway);04211(Longevity regulating pathway);04213(Longevity regulating pathway - multiple species);04371(Apelin signaling pathway);04530(Tight junction);04710(Circadian rhythm);04714(Thermogenesis);04910(Insulin signaling pathway);04920(Adipocytokine signaling pathway);04921(Oxytocin signaling pathway);04922(Glucagon signaling pathway);04931(Ins…	NA	NA	NA	protein kinase AMP-activated non-catalytic subunit gamma 1 [Source:VGNC Symbol;Acc:VGNC:103314]	protein_coding	28.0263	29.7877	31.125	34.5671	33.443	23.4858	27.2618	26.7854	29.735	29.1093	33.0524	32.4534	2618	2651	3478	3075	3757	2485	2975	3100	3596	3194	3125	3146
ENSSSCG00000000186	chr5	15094240	15097796	-	RHEBL1	100525816	ENSSSCT00000000197	GO:0003924(GTPase activity);GO:0005525(GTP binding);GO:0005737(cytoplasm);GO:0005886(plasma membrane);GO:0007165(signal transduction);GO:0007264(small GTPase mediated signal transduction);GO:0016020(membrane);GO:0019003(GDP binding);GO:0031929(TOR signaling);GO:0051092(positive regulation of NF-kappaB transcription factor activity)	NA	NA	NA	NA	RHEB like 1 [Source:VGNC Symbol;Acc:VGNC:92280]	protein_coding	0.541729	0.517013	0.178543	0.213827	0.258981	0.237128	0.046948	0.049926	0	0.261935	0.106777	0.196701	37	33	15	14	21	18	4	5	0	21	8	14
ENSSSCG00000000188	chr5	15114527	15119577	-	DHH	100505406	ENSSSCT00000000199	GO:0001649(osteoblast differentiation);GO:0001708(cell fate specification);GO:0005113(patched binding);GO:0005509(calcium ion binding);GO:0005615(extracellular space);GO:0005886(plasma membrane);GO:0006508(proteolysis);GO:0007224(smoothened signaling pathway);GO:0007267(cell-cell signaling);GO:0007286(spermatid development);GO:0008233(peptidase activity);GO:0008270(zinc ion binding);GO:0010468(re…	04340(Hedgehog signaling pathway)	NA	NA	NA	desert hedgehog signaling molecule [Source:VGNC Symbol;Acc:VGNC:87280]	protein_coding	1.83057	1.02025	0.240109	0.661074	0.423847	0.75625	0.708155	1.59003	0.728806	0.358076	0.532304	0.141411	162	86	26	56	46	76	74	175	84	38	48	13
ENSSSCG00000000189	chr5	15121555	15135252	-	LMBR1L	100525991	ENSSSCT00000050999;ENSSSCT00000000200;ENSSSCT00000074724	GO:0004888(transmembrane signaling receptor activity);GO:0005789(endoplasmic reticulum membrane);GO:0005886(plasma membrane);GO:0005887(integral component of plasma membrane);GO:0006898(receptor-mediated endocytosis);GO:0007165(signal transduction);GO:0016020(membrane);GO:0016021(integral component of membrane);GO:0030217(T cell differentiation);GO:0042098(T cell proliferation);GO:0060218(hematop…	NA	NA	NA	NA	limb development membrane protein 1 like [Source:VGNC Symbol;Acc:VGNC:89753]	protein_coding	8.0072	8.74101	6.90682	14.0142	12.1112	7.8629	4.6389	6.20258	6.32645	7.94656	5.15441	7.0571	920	956	949	1531	1672	1024	623	883	940	1072	600	842
ENSSSCG00000000190	chr5	15149099	15153620	-	TUBA1B	733594	ENSSSCT00000051798;ENSSSCT00000094276;ENSSSCT00000102574;ENSSSCT00000099691;ENSSSCT00000092597;ENSSSCT00000000203;ENSSSCT00000000837	GO:0000166(nucleotide binding);GO:0000226(microtubule cytoskeleton organization);GO:0000278(mitotic cell cycle);GO:0003725(double-stranded RNA binding);GO:0005200(structural constituent of cytoskeleton);GO:0005525(GTP binding);GO:0005737(cytoplasm);GO:0005856(cytoskeleton);GO:0005874(microtubule);GO:0005881(cytoplasmic microtubule);GO:0007010(cytoskeleton organization);GO:0007017(microtubule-base…	04145(Phagosome);04210(Apoptosis);04530(Tight junction);04540(Gap junction);05010(Alzheimer disease);05012(Parkinson disease);05014(Amyotrophic lateral sclerosis);05016(Huntington disease);05020(Prion disease);05022(Pathways of neurodegeneration - multiple diseases);05132(Salmonella infection);05132(Salmonella infection)	NA	NA	NA	tubulin alpha 1b [Source:NCBI gene (formerly Entrezgene);Acc:733594]	protein_coding	197.653	179.741	151.889	133.736	141.207	184.491	216.106	265.224	211.221	104.866	184.857	183.747	30558	26480	28094	19687	26258	32317	39035	50806	42277	19045	28935	29491
ENSSSCG00000000194	chr5	15153106	15269777	+	ENSSSCG00000000194		ENSSSCT00000000207;ENSSSCT00000088236;ENSSSCT00000012196	GO:0000166(nucleotide binding);GO:0000226(microtubule cytoskeleton organization);GO:0000278(mitotic cell cycle);GO:0005200(structural constituent of cytoskeleton);GO:0005525(GTP binding);GO:0005737(cytoplasm);GO:0005856(cytoskeleton);GO:0005874(microtubule);GO:0007010(cytoskeleton organization);GO:0007017(microtubule-based process);GO:0007017(microtubule-based process)	04145(Phagosome);04210(Apoptosis);04530(Tight junction);04540(Gap junction);05010(Alzheimer disease);05012(Parkinson disease);05014(Amyotrophic lateral sclerosis);05016(Huntington disease);05020(Prion disease);05022(Pathways of neurodegeneration - multiple diseases);05132(Salmonella infection);05132(Salmonella infection)	NA	NA	NA		protein_coding	24.6238	21.2128	24.6609	47.1203	47.7224	58.051	26.1704	41.7343	24.3143	17.4911	245.932	32.2138	3353	2754	4018	6109	7817	8956	4164	7042	4287	2798	33902	4555
ENSSSCG00000000195	chr5	15285294	15288798	+	PRPH	100152434,5961	ENSSSCT00000000208	GO:0005198(structural molecule activity);GO:0005882(intermediate filament);GO:0030424(axon);GO:0045098(type III intermediate filament);GO:0045104(intermediate filament cytoskeleton organization)	05014(Amyotrophic lateral sclerosis);05022(Pathways of neurodegeneration - multiple diseases)	NA	NA	NA	peripherin [Source:VGNC Symbol;Acc:VGNC:91847]	protein_coding	0.117171	0	0.370573	0	0	0.069677	0.158008	0.186873	0.143074	0	0.260165	0	11	0	39	0	0	7	16	20	16	0	23	0
ENSSSCG00000000197	chr5	15308210	15311915	-	C1QL4	100512604	ENSSSCT00000000210	GO:0005615(extracellular space);GO:0042802(identical protein binding);GO:0045599(negative regulation of fat cell differentiation);GO:0048144(fibroblast proliferation);GO:0048147(negative regulation of fibroblast proliferation);GO:0070371(ERK1 and ERK2 cascade);GO:0070373(negative regulation of ERK1 and ERK2 cascade)	NA	NA	NA	NA	complement C1q like 4 [Source:VGNC Symbol;Acc:VGNC:85980]	protein_coding	0	0	0	0.031325	0	0.028666	0	0	0	0.040625	0	0	0	0	0	3	0	3	0	0	0	4	0	0
ENSSSCG00000000198	chr5	15322674	15335950	+	DNAJC22	100623474	ENSSSCT00000000211	GO:0005769(early endosome);GO:0005886(plasma membrane);GO:0006897(endocytosis);GO:0016020(membrane);GO:0016021(integral component of membrane)	NA	NA	NA	NA	DnaJ heat shock protein family (Hsp40) member C22 [Source:VGNC Symbol;Acc:VGNC:103231]	protein_coding	0	0	0.331663	0	0	0	0	0.027463	0	0	0	0	0	0	47	0	0	0	0	4	0	0	0	0
ENSSSCG00000000199	chr5	15347633	15484935	+	SPATS2	100738620	ENSSSCT00000042119;ENSSSCT00000000212;ENSSSCT00000076259	GO:0005737(cytoplasm);GO:0005829(cytosol);GO:0005829(cytosol)	NA	NA	NA	NA	spermatogenesis associated serine rich 2 [Source:HGNC Symbol;Acc:HGNC:18650]	protein_coding	4.17267	3.80115	4.29149	6.20123	5.22463	3.75085	4.65348	4.08407	3.77849	3.96839	3.94732	3.88639	910	790	1120	1288	1371	927	1186	1104	1068	1017	872	881
ENSSSCG00000000202	chr5	15517032	15526510	-	MCRS1	100516550	ENSSSCT00000000215;ENSSSCT00000065788	GO:0000123(histone acetyltransferase complex);GO:0000723(telomere maintenance);GO:0002151(G-quadruplex RNA binding);GO:0005634(nucleus);GO:0005654(nucleoplasm);GO:0005730(nucleolus);GO:0005737(cytoplasm);GO:0006275(regulation of DNA replication);GO:0006282(regulation of DNA repair);GO:0006338(chromatin remodeling);GO:0008266(poly(U) RNA binding);GO:0031011(Ino80 complex);GO:0033044(regulation of …	NA	NA	NA	NA	microspherule protein 1 [Source:VGNC Symbol;Acc:VGNC:90082]	protein_coding	18.0898	16.8307	13.7729	19.2484	19.3255	16.988	19.5192	21.7701	15.846	15.6742	17.5816	14.9803	1922	1705	1752	1948	2471	2046	2424	2866	2181	1957	1892	1654
ENSSSCG00000000203	chr5	15495157	15517022	+	KCNH3	100514837	ENSSSCT00000024572	GO:0005216(ion channel activity);GO:0005244(voltage-gated ion channel activity);GO:0005249(voltage-gated potassium channel activity);GO:0005267(potassium channel activity);GO:0005887(integral component of plasma membrane);GO:0006811(ion transport);GO:0006813(potassium ion transport);GO:0016020(membrane);GO:0016021(integral component of membrane);GO:0034220(ion transmembrane transport);GO:0034765(…	NA	NA	NA	NA	potassium voltage-gated channel subfamily H member 3 [Source:VGNC Symbol;Acc:VGNC:89344]	protein_coding	6.77506	9.25251	9.23862	1.1395	2.07843	6.39301	10.276	9.78443	6.29857	7.3513	12.0089	5.15994	1200	1561	1957	193	443	1282	2125	2146	1444	1529	2152	949
ENSSSCG00000000204	chr5	15570474	15592383	+	PRPF40B	100515026	ENSSSCT00000000217	GO:0005634(nucleus);GO:0045292(mRNA cis splicing, via spliceosome)	03040(Spliceosome)	NA	NA	NA	pre-mRNA processing factor 40 homolog B [Source:VGNC Symbol;Acc:VGNC:91844]	protein_coding	5.9933	6.89481	6.23735	7.82236	7.13545	4.3562	6.14382	4.97472	5.51705	6.86632	3.0951	7.24528	930	1020	1158	1156	1332	766	1114	957	1109	1252	487	1168
ENSSSCG00000000205	chr5	15541865	15559720	-	FAM186B	100515313	ENSSSCT00000000218;ENSSSCT00000066441	GO:0032991(protein-containing complex);GO:0032991(protein-containing complex)	NA	NA	NA	NA	family with sequence similarity 186 member B [Source:VGNC Symbol;Acc:VGNC:87941]	protein_coding	0.209769	0.182107	0.449036	0.406948	0.373939	0.11205	0.432599	0.11675	0.0566032	0.320496	0.0915768	0.145908	31	27	79	57	67	19	75	22	11	56	14	23
ENSSSCG00000000206	chr5	15779334	15812541	-	FAIM2	110255191	ENSSSCT00000091707;ENSSSCT00000000219;ENSSSCT00000088936	GO:0002931(response to ischemia);GO:0005783(endoplasmic reticulum);GO:0005794(Golgi apparatus);GO:0016020(membrane);GO:0016021(integral component of membrane);GO:0021549(cerebellum development);GO:0021680(cerebellar Purkinje cell layer development);GO:0021681(cerebellar granular layer development);GO:0021702(cerebellar Purkinje cell differentiation);GO:0043523(regulation of neuron apoptotic proce…	NA	NA	NA	NA	Fas apoptotic inhibitory molecule 2 [Source:VGNC Symbol;Acc:VGNC:87883]	protein_coding	0.230097	0.0896366	0.0955817	0.0378124	0.0667458	0.0417479	0.0293158	0.206474	0.399355	0.132314	0.125717	0.162061	52	19	27	8	18	11	8	58	115	35	29	38
ENSSSCG00000000207	chr5	15774938	15775794	+	ENSSSCG00000000207		ENSSSCT00000000220	GO:0005509(calcium ion binding);GO:0005737(cytoplasm)	NA	NA	NA	NA		protein_coding	12.5496	100.065	61.0069	14.3362	44.6865	166.576	10.5802	7.92263	11.6153	15.8228	13.532	101.147	336	2549	1951	365	1437	5045	331	263	402	497	367	2807
ENSSSCG00000000209	chr5	15711253	15725097	-	NCKAP5L	100516908	ENSSSCT00000038291;ENSSSCT00000081938	GO:0001578(microtubule bundle formation);GO:0005813(centrosome);GO:0007019(microtubule depolymerization);GO:0035371(microtubule plus-end);GO:0035371(microtubule plus-end)	NA	NA	NA	NA	NCK associated protein 5 like [Source:VGNC Symbol;Acc:VGNC:90611]	protein_coding	3.5769	3.41894	4.37003	5.71564	5.58206	3.12289	3.73456	3.1378	2.60959	3.52448	2.57395	2.93841	852	776	1245	1297	1599	843	1040	926	805	987	621	727
ENSSSCG00000000211	chr5	15876407	15880067	+	AQP5	100126278	ENSSSCT00000000226	GO:0005783(endoplasmic reticulum);GO:0005886(plasma membrane);GO:0005887(integral component of plasma membrane);GO:0005902(microvillus);GO:0006833(water transport);GO:0009925(basal plasma membrane);GO:0015250(water channel activity);GO:0015267(channel activity);GO:0015670(carbon dioxide transport);GO:0016020(membrane);GO:0016021(integral component of membrane);GO:0016324(apical plasma membrane);G…	04970(Salivary secretion)	NA	NA	NA	aquaporin 5 [Source:VGNC Symbol;Acc:VGNC:85433]	protein_coding	0	0.060111	4.73408	0.089836	0.039633	0	0	0.137761	0	0	0	0.044069	0	4	393	6	4	0	0	12	0	0	0	4
ENSSSCG00000000212	chr5	15887966	15890805	+	AQP6	100145893	ENSSSCT00000089729	GO:0003097(renal water transport);GO:0005886(plasma membrane);GO:0006833(water transport);GO:0015112(nitrate transmembrane transporter activity);GO:0015250(water channel activity);GO:0015267(channel activity);GO:0015670(carbon dioxide transport);GO:0015706(nitrate transmembrane transport);GO:0016020(membrane);GO:0016021(integral component of membrane);GO:0016324(apical plasma membrane);GO:0042476…	NA	NA	NA	NA	aquaporin 6 [Source:VGNC Symbol;Acc:VGNC:85434]	protein_coding	0	0	0	0	0	0.0954806	0	0	0	0	0	0	0	0	0	0	0	6	0	0	0	0	0	0
ENSSSCG00000000214	chr5	16007448	16014425	+	GPD1	100153250	ENSSSCT00000040822;ENSSSCT00000000229;ENSSSCT00000048306	GO:0004367(glycerol-3-phosphate dehydrogenase [NAD+] activity);GO:0005829(cytosol);GO:0005975(carbohydrate metabolic process);GO:0006072(glycerol-3-phosphate metabolic process);GO:0006094(gluconeogenesis);GO:0006116(NADH oxidation);GO:0006127(glycerophosphate shuttle);GO:0009331(glycerol-3-phosphate dehydrogenase complex);GO:0016491(oxidoreductase activity);GO:0016616(oxidoreductase activity, act…	00564(Glycerophospholipid metabolism);00564(Glycerophospholipid metabolism)	K00006	EC:1.1.1.8	NA	glycerol-3-phosphate dehydrogenase 1 [Source:VGNC Symbol;Acc:VGNC:88583]	protein_coding	101.882	116.774	101.251	105.122	108.081	122.77	111.486	112.797	136.778	137.859	147.466	139.591	28225	30829	33560	27731	36015	38535	36087	38719	49060	44865	41362	40147
ENSSSCG00000000215	chr5	15992260	16005710	+	SMARCD1	100155712	ENSSSCT00000000230;ENSSSCT00000056120	GO:0003712(transcription coregulator activity);GO:0005634(nucleus);GO:0005654(nucleoplasm);GO:0006337(nucleosome disassembly);GO:0006338(chromatin remodeling);GO:0006357(regulation of transcription by RNA polymerase II);GO:0016514(SWI/SNF complex);GO:0043231(intracellular membrane-bounded organelle);GO:0045815(epigenetic maintenance of chromatin in transcription-competent conformation);GO:0060090…	04714(Thermogenesis);05225(Hepatocellular carcinoma);05225(Hepatocellular carcinoma)	NA	NA	NA	SWI/SNF related, matrix associated, actin dependent regulator of chromatin, subfamily d, member 1 [Source:VGNC Symbol;Acc:VGNC:93233]	protein_coding	9.18737	7.52126	7.31963	11.3007	9.3212	8.42039	7.6227	7.9433	6.79969	8.18422	6.48184	6.65596	1672	1305	1594	1958	2040	1737	1621	1791	1602	1750	1194	1258
ENSSSCG00000000216	chr5	15965084	15991876	+	ASIC1	100517467	ENSSSCT00000000232;ENSSSCT00000038460	GO:0001662(behavioral fear response);GO:0001975(response to amphetamine);GO:0005261(cation channel activity);GO:0005272(sodium channel activity);GO:0005794(Golgi apparatus);GO:0005886(plasma membrane);GO:0005887(integral component of plasma membrane);GO:0006812(cation transport);GO:0006814(sodium ion transport);GO:0007269(neurotransmitter secretion);GO:0007613(memory);GO:0008306(associative learn…	04750(Inflammatory mediator regulation of TRP channels);04750(Inflammatory mediator regulation of TRP channels)	NA	NA	NA	acid sensing ion channel subunit 1 [Source:VGNC Symbol;Acc:VGNC:85578]	protein_coding	0.0818464	0.0388888	0.102245	0.0743812	0.0910085	0.12189	0.210694	0.178688	0.124428	0	0.111312	1.17034	18	8	26	15	24	30	52	47	34	0	24	256
ENSSSCG00000000217	chr5	15904712	15943609	+	RACGAP1	100517651	ENSSSCT00000000233;ENSSSCT00000050218	GO:0000281(mitotic cytokinesis);GO:0000915(actomyosin contractile ring assembly);GO:0005096(GTPase activator activity);GO:0005547(phosphatidylinositol-3,4,5-trisphosphate binding);GO:0005634(nucleus);GO:0005654(nucleoplasm);GO:0005819(spindle);GO:0007165(signal transduction);GO:0007283(spermatogenesis);GO:0008017(microtubule binding);GO:0008272(sulfate transport);GO:0019901(protein kinase binding…	NA	NA	NA	NA	Rac GTPase activating protein 1 [Source:VGNC Symbol;Acc:VGNC:92050]	protein_coding	2.53614	2.60742	3.31025	2.21233	1.8284	2.4045	3.3812	4.66289	2.53389	1.29424	1.97636	1.71648	370	363	578	308	321	398	577	843	479	223	292	260
ENSSSCG00000000228	chr5	16977700	17169543	+	SCN8A	100522189	ENSSSCT00000106619	GO:0001518(voltage-gated sodium channel complex);GO:0005216(ion channel activity);GO:0005244(voltage-gated ion channel activity);GO:0005248(voltage-gated sodium channel activity);GO:0005261(cation channel activity);GO:0005272(sodium channel activity);GO:0005886(plasma membrane);GO:0006811(ion transport);GO:0006814(sodium ion transport);GO:0016020(membrane);GO:0016021(integral component of membran…	NA	NA	NA	NA	sodium voltage-gated channel alpha subunit 8 [Source:VGNC Symbol;Acc:VGNC:92638]	protein_coding	0.0428639	0.0575249	0.177165	0.138131	0.147167	0.177909	0.0485785	0.157672	0.0728016	0.0509093	0.0609491	0.0181148	16	20	75	47	62	71	20	69	34	21	22	7
ENSSSCG00000000231	chr5	17248070	17250958	+	ENSSSCG00000000231		ENSSSCT00000000250	GO:0000122(negative regulation of transcription by RNA polymerase II);GO:0035914(skeletal muscle cell differentiation);GO:2000678(negative regulation of transcription regulatory region DNA binding)	NA	NA	NA	NA	ankyrin repeat domain 33 [Source:VGNC Symbol;Acc:VGNC:85333]	protein_coding	0	0.142251	0	0	0.126117	0.302573	0	0	0	0	0	0	0	8	0	0	9	20	0	0	0	0	0	0
ENSSSCG00000000232	chr5	17268130	17286276	+	ACVRL1	100153279	ENSSSCT00000095024;ENSSSCT00000064488;ENSSSCT00000000251	GO:0000166(nucleotide binding);GO:0001525(angiogenesis);GO:0001701(in utero embryonic development);GO:0001937(negative regulation of endothelial cell proliferation);GO:0001938(positive regulation of endothelial cell proliferation);GO:0001946(lymphangiogenesis);GO:0001974(blood vessel remodeling);GO:0003203(endocardial cushion morphogenesis);GO:0004672(protein kinase activity);GO:0004674(protein s…	04060(Cytokine-cytokine receptor interaction);04060(Cytokine-cytokine receptor interaction)	K13594	EC:2.7.11.30	NA	activin A receptor like type 1 [Source:VGNC Symbol;Acc:VGNC:85057]	protein_coding	12.944	10.3871	8.86784	13.0862	12.6744	12.6467	11.7696	14.5218	10.5121	11.0859	9.4212	9.85631	3774	2888	3094	3634	4445	4178	4010	5246	3969	3798	2783	2983
ENSSSCG00000000233	chr5	17314276	17350722	+	ACVR1B	100152462	ENSSSCT00000071034;ENSSSCT00000000252;ENSSSCT00000068474	GO:0000082(G1/S transition of mitotic cell cycle);GO:0000166(nucleotide binding);GO:0001701(in utero embryonic development);GO:0001942(hair follicle development);GO:0004672(protein kinase activity);GO:0004674(protein serine/threonine kinase activity);GO:0004675(transmembrane receptor protein serine/threonine kinase activity);GO:0005524(ATP binding);GO:0005829(cytosol);GO:0005886(plasma membrane);…	04060(Cytokine-cytokine receptor interaction);04350(TGF-beta signaling pathway);04550(Signaling pathways regulating pluripotency of stem cells);04550(Signaling pathways regulating pluripotency of stem cells)	K13567	EC:2.7.11.30	NA	activin A receptor type 1B [Source:VGNC Symbol;Acc:VGNC:85056]	protein_coding	1.83144	1.50329	1.76092	2.65555	2.27832	2.06845	1.46697	1.40926	1.62545	1.13325	1.35969	1.5133	264	206	304	364	394	337	247	252	302	192	199	226
ENSSSCG00000000234	chr5	17355883	17366309	+	TAMALIN	100522015	ENSSSCT00000000253;ENSSSCT00000088102	GO:0005886(plasma membrane);GO:0007165(signal transduction);GO:0098685(Schaffer collateral - CA1 synapse);GO:0098978(glutamatergic synapse);GO:0099152(regulation of neurotransmitter receptor transport, endosome to postsynaptic membrane);GO:0099152(regulation of neurotransmitter receptor transport, endosome to postsynaptic membrane)	NA	NA	NA	NA	trafficking regulator and scaffold protein tamalin [Source:VGNC Symbol;Acc:VGNC:88661]	protein_coding	8.48686	7.18137	4.44959	8.49588	7.3466	5.22185	6.74548	6.64782	4.41704	11.8206	4.3111	3.98896	1124	906	706	1071	1171	784	1045	1091	758	1838	578	549
ENSSSCG00000000251	chr5	18012925	18018582	-	KRT1	100049664	ENSSSCT00000000270	GO:0001533(cornified envelope);GO:0001867(complement activation, lectin pathway);GO:0005737(cytoplasm);GO:0005882(intermediate filament);GO:0005886(plasma membrane);GO:0016020(membrane);GO:0018149(peptide cross-linking);GO:0030246(carbohydrate binding);GO:0030280(structural constituent of skin epidermis);GO:0031424(keratinization);GO:0045095(keratin filament);GO:0045109(intermediate filament orga…	NA	NA	NA	NA	keratin 1 [Source:VGNC Symbol;Acc:VGNC:89576]	protein_coding	0	0	0	0	0	0.077304	0	0.028199	0	0	0.034281	0	0	0	0	0	0	11	0	5	0	0	4	0
ENSSSCG00000000252	chr5	18167553	18180404	-	KRT8	100152077	ENSSSCT00000048358;ENSSSCT00000042524;ENSSSCT00000096621	GO:0005882(intermediate filament);GO:0005911(cell-cell junction);GO:0016327(apicolateral plasma membrane);GO:0030018(Z disc);GO:0033209(tumor necrosis factor-mediated signaling pathway);GO:0042383(sarcolemma);GO:0045095(keratin filament);GO:0051707(response to other organism);GO:0060706(cell differentiation involved in embryonic placenta development);GO:0071944(cell periphery);GO:0097191(extrinsi…	NA	NA	NA	NA	keratin 8 [Source:VGNC Symbol;Acc:VGNC:89596]	protein_coding	9.19913	1.7922	3.27718	1.04247	0.70187	0.135941	0.0924907	6.62499	1.46402	1.03091	0	0.361841	829	154	353	90	76	14	10	739	171	110	0	34
ENSSSCG00000000253	chr5	18217691	18221429	+	KRT18	100126286	ENSSSCT00000074447	GO:0005198(structural molecule activity);GO:0005737(cytoplasm);GO:0005815(microtubule organizing center);GO:0005829(cytosol);GO:0005882(intermediate filament);GO:0033209(tumor necrosis factor-mediated signaling pathway);GO:0034451(centriolar satellite);GO:0043000(Golgi to plasma membrane CFTR protein transport);GO:0043066(negative regulation of apoptotic process);GO:0045095(keratin filament);GO:0…	04915(Estrogen signaling pathway);05150(Staphylococcus aureus infection)	NA	NA	NA	keratin 18 [Source:VGNC Symbol;Acc:VGNC:89580]	protein_coding	2.85211	0.71039	4.3433	0.163522	0.26002	0	0	1.04228	0.334192	0.186876	0	0.049932	197	47	359	11	22	0	0	90	30	16	0	4
ENSSSCG00000000257	chr5	18419436	18434336	-	ITGB7	397221	ENSSSCT00000000276;ENSSSCT00000057390;ENSSSCT00000043023	GO:0003366(cell-matrix adhesion involved in ameboidal cell migration);GO:0005178(integrin binding);GO:0005768(endosome);GO:0005925(focal adhesion);GO:0007155(cell adhesion);GO:0007160(cell-matrix adhesion);GO:0007229(integrin-mediated signaling pathway);GO:0008305(integrin complex);GO:0009986(cell surface);GO:0016020(membrane);GO:0016021(integral component of membrane);GO:0016477(cell migration);…	04151(PI3K-Akt signaling pathway);04510(Focal adhesion);04512(ECM-receptor interaction);04514(Cell adhesion molecules);04672(Intestinal immune network for IgA production);04810(Regulation of actin cytoskeleton);05165(Human papillomavirus infection);05202(Transcriptional misregulation in cancer);05410(Hypertrophic cardiomyopathy);05412(Arrhythmogenic right ventricular cardiomyopathy);05414(Dilated…	NA	NA	NA	integrin subunit beta 7 [Source:VGNC Symbol;Acc:VGNC:89245]	protein_coding	7.50271	3.32759	2.6095	2.01019	2.90072	2.5856	3.82623	6.04201	4.32089	5.00945	3.61442	2.4738	1128	477	470	288	525	441	672	1126	842	885	550	386
ENSSSCG00000000258	chr5	18437379	18446834	-	RARG	100626982	ENSSSCT00000061540;ENSSSCT00000057684;ENSSSCT00000000277	GO:0000122(negative regulation of transcription by RNA polymerase II);GO:0000785(chromatin);GO:0000978(RNA polymerase II cis-regulatory region sequence-specific DNA binding);GO:0001843(neural tube closure);GO:0002063(chondrocyte development);GO:0002068(glandular epithelial cell development);GO:0003417(growth plate cartilage development);GO:0003430(growth plate cartilage chondrocyte growth);GO:000…	NA	NA	NA	THR-like	retinoic acid receptor gamma [Source:HGNC Symbol;Acc:HGNC:9866]	protein_coding	13.9833	10.453	9.81719	4.37086	5.20788	7.90122	11.8251	12.7866	13.6276	12.157	8.94007	9.60501	2152	1534	1807	641	965	1378	2126	2439	2715	2199	1394	1535
ENSSSCG00000000259	chr5	18379288	18410646	-	CSAD	100515377	ENSSSCT00000058957;ENSSSCT00000000278;ENSSSCT00000045149;ENSSSCT00000040873;ENSSSCT00000040597	GO:0003824(catalytic activity);GO:0004782(sulfinoalanine decarboxylase activity);GO:0005737(cytoplasm);GO:0016829(lyase activity);GO:0016830(carbon-carbon lyase activity);GO:0016831(carboxy-lyase activity);GO:0019752(carboxylic acid metabolic process);GO:0030170(pyridoxal phosphate binding);GO:0042412(taurine biosynthetic process);GO:0042412(taurine biosynthetic process)	00430(Taurine and hypotaurine metabolism);01100(Metabolic pathways);01100(Metabolic pathways)	K01594	EC:4.1.1.29	NA	cysteine sulfinic acid decarboxylase [Source:VGNC Symbol;Acc:VGNC:87027]	protein_coding	21.1155	19.9417	20.641	26.9723	29.58	32.7011	24.0589	23.3555	29.478	21.7823	21.3907	24.3571	3129	2816	3659	3807	5272	5489	4166	4288	5656	3792	3209	3747
ENSSSCG00000000260	chr5	18358673	18371264	+	SOAT2	100515544	ENSSSCT00000000279	GO:0000062(fatty-acyl-CoA binding);GO:0004772(sterol O-acyltransferase activity);GO:0005783(endoplasmic reticulum);GO:0005789(endoplasmic reticulum membrane);GO:0005903(brush border);GO:0008202(steroid metabolic process);GO:0008203(cholesterol metabolic process);GO:0008374(O-acyltransferase activity);GO:0015485(cholesterol binding);GO:0016020(membrane);GO:0016021(integral component of membrane);G…	00100(Steroid biosynthesis);04979(Cholesterol metabolism)	K00637	EC:2.3.1.26	NA	sterol O-acyltransferase 2 [Source:VGNC Symbol;Acc:VGNC:93328]	protein_coding	0.761074	0.139529	0.495696	0.101762	0.248146	0.108814	0.303537	0.293225	0.333236	0.28275	0.172539	0.358452	81	15	63	11	32	14	38	39	46	36	19	40
ENSSSCG00000000261	chr5	18352400	18357225	+	IGFBP6	100101923	ENSSSCT00000000280;ENSSSCT00000067343	GO:0001968(fibronectin binding);GO:0005520(insulin-like growth factor binding);GO:0005576(extracellular region);GO:0005615(extracellular space);GO:0016477(cell migration);GO:0019838(growth factor binding);GO:0031994(insulin-like growth factor I binding);GO:0031995(insulin-like growth factor II binding);GO:0032874(positive regulation of stress-activated MAPK cascade);GO:0042568(insulin-like growth…	NA	NA	NA	NA	insulin like growth factor binding protein 6 [Source:VGNC Symbol;Acc:VGNC:89059]	protein_coding	59.0153	27.5026	74.1112	35.0469	31.5912	28.4132	66.7516	107.166	50.2036	25.4003	37.9781	65.8466	5565	2472	8361	3147	3584	3036	7354	12520	6129	2814	3626	6446
ENSSSCG00000000262	chr5	18320759	18338648	-	SPRYD3	100514838	ENSSSCT00000050035	NA	NA	NA	NA	NA	SPRY domain containing 3 [Source:VGNC Symbol;Acc:VGNC:93428]	protein_coding	22.4279	21.5835	23.3058	19.1148	20.5395	22.7714	18.4558	21.3914	20.1063	18.1658	20.0102	16.7156	2961	2716	3681	2403	3262	3406	2847	3499	3437	2818	2675	2291
ENSSSCG00000000263	chr5	18303368	18320781	+	TNS2	100156301	ENSSSCT00000083292;ENSSSCT00000000282;ENSSSCT00000000273;ENSSSCT00000102742	GO:0001822(kidney development);GO:0004725(protein tyrosine phosphatase activity);GO:0005925(focal adhesion);GO:0008285(negative regulation of cell population proliferation);GO:0014850(response to muscle activity);GO:0019725(cellular homeostasis);GO:0019900(kinase binding);GO:0030054(cell junction);GO:0032963(collagen metabolic process);GO:0035264(multicellular organism growth);GO:0035335(peptidyl…	NA	NA	NA	NA	tensin 2 [Source:VGNC Symbol;Acc:VGNC:94295]	protein_coding	45.2681	49.0983	32.069	48.6285	48.7424	51.1275	36.8537	30.5723	30.6763	48.4977	30.4094	42.531	12421	12839	10528	12705	16087	15894	11815	10394	10898	15633	8448	12115
ENSSSCG00000000264	chr5	18476431	18478737	+	MFSD5	100157167	ENSSSCT00000039691;ENSSSCT00000070522;ENSSSCT00000000283	GO:0005886(plasma membrane);GO:0006811(ion transport);GO:0015098(molybdate ion transmembrane transporter activity);GO:0015689(molybdate ion transport);GO:0016020(membrane);GO:0016021(integral component of membrane);GO:0016021(integral component of membrane)	NA	NA	NA	NA	major facilitator superfamily domain containing 5 [Source:VGNC Symbol;Acc:VGNC:90192]	protein_coding	11.0475	7.92193	10.0446	10.6318	11.6826	9.72702	10.9134	10.4241	7.29901	9.19706	6.30299	9.0388	1006	687	1094	923	1280	1004	1161	1176	860	984	581	856
ENSSSCG00000000265	chr5	18487052	18509913	+	ESPL1	100153121	ENSSSCT00000000284	GO:0000070(mitotic sister chromatid segregation);GO:0000212(meiotic spindle organization);GO:0000278(mitotic cell cycle);GO:0000280(nuclear division);GO:0004197(cysteine-type endopeptidase activity);GO:0005634(nucleus);GO:0005737(cytoplasm);GO:0005813(centrosome);GO:0006508(proteolysis);GO:0007059(chromosome segregation);GO:0007127(meiosis I);GO:0008233(peptidase activity);GO:0008234(cysteine-typ…	04110(Cell cycle);04114(Oocyte meiosis);05166(Human T-cell leukemia virus 1 infection)	K02365	EC:3.4.22.49	NA	extra spindle pole bodies like 1, separase [Source:VGNC Symbol;Acc:VGNC:87790]	protein_coding	0.269687	0.246639	0.327862	0.294244	0.173616	0.264705	0.28877	0.574006	0.499019	0.123081	0.239114	0.253311	86	75	124	89	66	95	107	225	204	46	77	83
ENSSSCG00000000267	chr5	18512697	18517174	+	PFDN5	106504162	ENSSSCT00000103192;ENSSSCT00000000286	GO:0001540(amyloid-beta binding);GO:0005634(nucleus);GO:0005737(cytoplasm);GO:0005829(cytosol);GO:0006457(protein folding);GO:0016272(prefoldin complex);GO:0045111(intermediate filament cytoskeleton);GO:0045892(negative regulation of DNA-templated transcription);GO:0051082(unfolded protein binding);GO:0060041(retina development in camera-type eye);GO:0090090(negative regulation of canonical Wnt s…	NA	NA	NA	NA	MYG1 exonuclease [Source:VGNC Symbol;Acc:VGNC:90509]	protein_coding	17.2586	15.191	15.9286	16.6871	15.2306	12.4135	16.4729	21.0832	15.5087	19.0154	19.8379	25.279	1948	1634	2151	1793	2068	1587	2173	2948	2266	2521	2267	2961
ENSSSCG00000000268	chr5	18526076	18537830	-	AAAS	100154333	ENSSSCT00000000287;ENSSSCT00000068408;ENSSSCT00000089311;ENSSSCT00000094900;ENSSSCT00000069746	GO:0000922(spindle pole);GO:0001578(microtubule bundle formation);GO:0005635(nuclear envelope);GO:0005643(nuclear pore);GO:0005654(nucleoplasm);GO:0005813(centrosome);GO:0005829(cytosol);GO:0006913(nucleocytoplasmic transport);GO:0007612(learning);GO:0009566(fertilization);GO:0031965(nuclear membrane);GO:0072686(mitotic spindle);GO:0090307(mitotic spindle assembly);GO:0090307(mitotic spindle asse…	03013(RNA transport);03013(RNA transport)	NA	NA	NA	aladin WD repeat nucleoporin [Source:VGNC Symbol;Acc:VGNC:84936]	protein_coding	3.76291	4.80489	3.88859	2.76954	3.24544	4.79912	4.6539	4.89116	4.00449	4.28011	3.38727	3.58357	471	573	583	331	488	680	680	759	650	629	429	466
ENSSSCG00000000271	chr5	18642823	18648848	+	AMHR2	100154297	ENSSSCT00000104161;ENSSSCT00000000290;ENSSSCT00000076306	GO:0000166(nucleotide binding);GO:0004672(protein kinase activity);GO:0004674(protein serine/threonine kinase activity);GO:0004675(transmembrane receptor protein serine/threonine kinase activity);GO:0005026(transforming growth factor beta receptor activity, type II);GO:0005524(ATP binding);GO:0005886(plasma membrane);GO:0006468(protein phosphorylation);GO:0007178(transmembrane receptor protein se…	04060(Cytokine-cytokine receptor interaction);04350(TGF-beta signaling pathway);04350(TGF-beta signaling pathway)	K04672	EC:2.7.11.30	NA	anti-Mullerian hormone receptor type 2 [Source:VGNC Symbol;Acc:VGNC:85279]	protein_coding	0.758365	1.71358	0.585068	2.0193	2.01237	0.654701	0.454898	0.402866	0.613929	0.788989	0.260182	0.387281	71	150	65	177	223	69	49	46	73	86	25	37
ENSSSCG00000000272	chr5	18588758	18630089	+	SP1	396575,5669,199699	ENSSSCT00000065738	GO:0000785(chromatin);GO:0000791(euchromatin);GO:0000976(transcription cis-regulatory region binding);GO:0000977(RNA polymerase II transcription regulatory region sequence-specific DNA binding);GO:0000978(RNA polymerase II cis-regulatory region sequence-specific DNA binding);GO:0000981(DNA-binding transcription factor activity, RNA polymerase II-specific);GO:0001221(transcription coregulator bind…	01522(Endocrine resistance);04137(Mitophagy - animal);04350(TGF-beta signaling pathway);04915(Estrogen signaling pathway);04927(Cortisol synthesis and secretion);04928(Parathyroid hormone synthesis, secretion and action);04934(Cushing syndrome);05016(Huntington disease);05017(Spinocerebellar ataxia);05163(Human cytomegalovirus infection);05200(Pathways in cancer);05202(Transcriptional misregulati…	NA	NA	zf-C2H2	Sp1 transcription factor [Source:VGNC Symbol;Acc:VGNC:93360]	protein_coding	7.81217	7.06732	5.73902	4.18289	3.38958	5.83684	6.47533	7.02482	6.59	5.04712	5.14147	5.75976	1086	936	955	554	567	920	1052	1210	1186	824	724	831
ENSSSCG00000000273	chr5	18660814	18665925	+	PRR13	100517160	ENSSSCT00000000292;ENSSSCT00000106445	GO:0005654(nucleoplasm);GO:0005829(cytosol);GO:0005829(cytosol)	NA	NA	NA	NA	proline rich 13 [Source:NCBI gene (formerly Entrezgene);Acc:100517160]	protein_coding	161.845	227.191	143.333	209.463	208.821	238.353	195.601	159.763	139.623	151.493	203.584	173.402	12176	16287	12901	15004	18896	20315	17193	14892	13599	13388	15506	13543
ENSSSCG00000000274	chr5	18673981	18704950	+	PCBP2	397665	ENSSSCT00000091552;ENSSSCT00000000294;ENSSSCT00000073313;ENSSSCT00000085185;ENSSSCT00000084330;ENSSSCT00000085719;ENSSSCT00000043239;ENSSSCT00000070951;ENSSSCT00000070049	GO:0003676(nucleic acid binding);GO:0003677(DNA binding);GO:0003697(single-stranded DNA binding);GO:0003723(RNA binding);GO:0003729(mRNA binding);GO:0005634(nucleus);GO:0005654(nucleoplasm);GO:0005737(cytoplasm);GO:0005829(cytosol);GO:0010468(regulation of gene expression);GO:0019899(enzyme binding);GO:0031625(ubiquitin protein ligase binding);GO:0039694(viral RNA genome replication);GO:0043161(p…	04216(Ferroptosis);04216(Ferroptosis)	NA	NA	NA	poly(rC) binding protein 2 [Source:VGNC Symbol;Acc:VGNC:103309]	protein_coding	88.2674	74.5188	90.663	127.673	119.971	99.441	78.0271	77.5711	82.7745	97.2653	66.5111	90.8183	17291	13911	21249	23812	28264	22070	17859	18828	20993	22382	13193	18468
ENSSSCG00000000275	chr5	18699385	18717199	-	MAP3K12	100517714	ENSSSCT00000000295	GO:0000166(nucleotide binding);GO:0004672(protein kinase activity);GO:0004674(protein serine/threonine kinase activity);GO:0004709(MAP kinase kinase kinase activity);GO:0005524(ATP binding);GO:0005737(cytoplasm);GO:0005829(cytosol);GO:0005886(plasma membrane);GO:0006468(protein phosphorylation);GO:0007254(JNK cascade);GO:0016301(kinase activity);GO:0016310(phosphorylation);GO:0016740(transferase …	04010(MAPK signaling pathway)	K04423	EC:2.7.11.25	NA	mitogen-activated protein kinase kinase kinase 12 [Source:VGNC Symbol;Acc:VGNC:89983]	protein_coding	2.58518	2.96999	2.25297	4.06157	3.46647	2.24541	2.11077	2.16436	1.7761	2.47291	2.5092	2.74685	524	573	546	783	844	515	499	543	466	588	515	577
ENSSSCG00000000276	chr5	18718688	18723839	+	TARBP2	100518071	ENSSSCT00000078809;ENSSSCT00000052105	GO:0003723(RNA binding);GO:0003725(double-stranded RNA binding);GO:0005634(nucleus);GO:0005654(nucleoplasm);GO:0005737(cytoplasm);GO:0006417(regulation of translation);GO:0007286(spermatid development);GO:0007338(single fertilization);GO:0016442(RISC complex);GO:0016604(nuclear body);GO:0019899(enzyme binding);GO:0030422(siRNA processing);GO:0031047(gene silencing by RNA);GO:0031054(pre-miRNA pro…	NA	NA	NA	NA	TARBP2 subunit of RISC loading complex [Source:VGNC Symbol;Acc:VGNC:93737]	protein_coding	15.8281	16.4932	14.8129	15.66	13.0267	13.7973	13.9386	15.914	15.9689	14.3164	15.2353	19.9191	1199	1191	1343	1130	1188	1184	1234	1494	1566	1274	1168	1567
ENSSSCG00000000277	chr5	18723784	18724826	-	NPFF	100518250	ENSSSCT00000000298	GO:0001664(G protein-coupled receptor binding);GO:0005102(signaling receptor binding);GO:0005184(neuropeptide hormone activity);GO:0005615(extracellular space);GO:0007165(signal transduction);GO:0030425(dendrite);GO:0043204(perikaryon);GO:0043679(axon terminus);GO:0060079(excitatory postsynaptic potential);GO:0098794(postsynapse)	04080(Neuroactive ligand-receptor interaction)	NA	NA	NA	neuropeptide FF-amide peptide [Source:VGNC Symbol;Acc:VGNC:90845]	protein_coding	1.82759	2.44751	1.89375	5.14903	3.69894	1.54258	2.10138	0.921609	1.40216	2.48043	2.35919	2.22266	64	81	79	171	155	61	86	40	63	102	83	81
ENSSSCG00000000278	chr5	18728711	18838542	-	ATF7	100518609	ENSSSCT00000023450;ENSSSCT00000042399;ENSSSCT00000000299;ENSSSCT00000070084	GO:0000976(transcription cis-regulatory region binding);GO:0001223(transcription coactivator binding);GO:0003677(DNA binding);GO:0003700(DNA-binding transcription factor activity);GO:0005634(nucleus);GO:0005654(nucleoplasm);GO:0006355(regulation of DNA-templated transcription);GO:0019899(enzyme binding);GO:0045944(positive regulation of transcription by RNA polymerase II);GO:0051019(mitogen-activ…	NA	NA	NA	TF_bZIP	activating transcription factor 7 [Source:HGNC Symbol;Acc:HGNC:792]	protein_coding	11.1994	12.0342	10.5209	16.5268	14.9741	10.0803	10.0564	8.94403	9.54324	11.7031	9.85408	11.4974	3778	3869	4247	5308	6075	3852	3964	3738	4169	4639	3366	4027
ENSSSCG00000000279	chr5	19151084	19158646	+	HOXC13	100518969	ENSSSCT00000000300	GO:0000976(transcription cis-regulatory region binding);GO:0000978(RNA polymerase II cis-regulatory region sequence-specific DNA binding);GO:0000981(DNA-binding transcription factor activity, RNA polymerase II-specific);GO:0001228(DNA-binding transcription activator activity, RNA polymerase II-specific);GO:0001942(hair follicle development);GO:0003677(DNA binding);GO:0003682(chromatin binding);GO…	NA	NA	NA	Homeobox	homeobox C13 [Source:VGNC Symbol;Acc:VGNC:88951]	protein_coding	0	0.041977	0.043532	0	0	0	0.034236	0.032284	0	0	0.079019	0.038532	0	4	6	0	0	0	4	4	0	0	8	4
ENSSSCG00000000288	chr5	19485096	19491417	+	HNRNPA1	768103	ENSSSCT00000075652;ENSSSCT00000058552;ENSSSCT00000071718	GO:0000381(regulation of alternative mRNA splicing, via spliceosome);GO:0003676(nucleic acid binding);GO:0003697(single-stranded DNA binding);GO:0003723(RNA binding);GO:0005634(nucleus);GO:0005654(nucleoplasm);GO:0005681(spliceosomal complex);GO:0005737(cytoplasm);GO:0019904(protein domain specific binding);GO:0032211(negative regulation of telomere maintenance via telomerase);GO:0032212(positive…	03040(Spliceosome);05014(Amyotrophic lateral sclerosis);05014(Amyotrophic lateral sclerosis)	NA	NA	NA	heteroous nuclear ribonucleoprotein A1 [Source:VGNC Symbol;Acc:VGNC:88918]	protein_coding	116.143	110.442	72.4229	143.714	128.776	91.4157	106.301	116.993	111.399	107.032	106.331	115.906	11980	10857	8939	14115	15977	10684	12812	14953	14878	12970	11105	12412
ENSSSCG00000000289	chr5	19494677	19501810	-	NFE2	100157948	ENSSSCT00000047127	GO:0000978(RNA polymerase II cis-regulatory region sequence-specific DNA binding);GO:0000981(DNA-binding transcription factor activity, RNA polymerase II-specific);GO:0000987(cis-regulatory region sequence-specific DNA binding);GO:0003677(DNA binding);GO:0003700(DNA-binding transcription factor activity);GO:0005634(nucleus);GO:0006355(regulation of DNA-templated transcription);GO:0006357(regulati…	NA	NA	NA	TF_bZIP	nuclear factor, erythroid 2 [Source:VGNC Symbol;Acc:VGNC:90712]	protein_coding	0.034006	0.049926	0.788128	0.136487	0.074464	0.124568	0.156868	0.173048	0	0.096766	0.111331	0.04583	3	4	79	11	8	12	16	18	0	10	10	4
ENSSSCG00000000290	chr5	19522613	19542372	+	COPZ1	100156765	ENSSSCT00000050520;ENSSSCT00000099135;ENSSSCT00000081626;ENSSSCT00000083749;ENSSSCT00000000311	GO:0000139(Golgi membrane);GO:0005737(cytoplasm);GO:0005794(Golgi apparatus);GO:0006886(intracellular protein transport);GO:0006890(retrograde vesicle-mediated transport, Golgi to endoplasmic reticulum);GO:0006891(intra-Golgi vesicle-mediated transport);GO:0015031(protein transport);GO:0016020(membrane);GO:0016192(vesicle-mediated transport);GO:0030117(membrane coat);GO:0030126(COPI vesicle coat)…	NA	NA	NA	NA	COPI coat complex subunit zeta 1 [Source:VGNC Symbol;Acc:VGNC:86903]	protein_coding	30.9644	24.2443	33.5324	27.7485	27.4666	29.2317	34.5032	38.0034	32.7632	27.5235	33.3745	30.1323	5011	3740	6491	4275	5346	5359	6523	7618	6863	5232	5467	5061
ENSSSCG00000000291	chr5	19552806	19554823	-	GPR84	100152279	ENSSSCT00000000312	GO:0001604(urotensin II receptor activity);GO:0004930(G protein-coupled receptor activity);GO:0005887(integral component of plasma membrane);GO:0007186(G protein-coupled receptor signaling pathway);GO:0007218(neuropeptide signaling pathway);GO:0008528(G protein-coupled peptide receptor activity);GO:0016020(membrane);GO:0016021(integral component of membrane);GO:0043235(receptor complex)	NA	NA	NA	NA	G protein-coupled receptor 84 [Source:NCBI gene (formerly Entrezgene);Acc:100152279]	protein_coding	0.170507	0	0	0.212537	0.098323	0.03775	0	0	0	0.061578	0	0.0412	16	0	0	19	11	4	0	0	0	7	0	4
ENSSSCG00000000292	chr5	19560318	19583221	-	ZNF385A	100736804	ENSSSCT00000103347;ENSSSCT00000075537;ENSSSCT00000049417;ENSSSCT00000000313;ENSSSCT00000073041;ENSSSCT00000096105	GO:0000785(chromatin);GO:0002039(p53 binding);GO:0003676(nucleic acid binding);GO:0003730(mRNA 3'-UTR binding);GO:0005634(nucleus);GO:0006915(apoptotic process);GO:0006974(cellular response to DNA damage stimulus);GO:0007599(hemostasis);GO:0007611(learning or memory);GO:0007626(locomotory behavior);GO:0008270(zinc ion binding);GO:0008298(intracellular mRNA localization);GO:0010609(mRNA localizati…	NA	NA	NA	zf-C2H2	zinc finger protein 385A [Source:VGNC Symbol;Acc:VGNC:95233]	protein_coding	2.09568	1.57491	3.48489	2.33492	2.24492	2.0472	2.15635	2.31232	1.94962	1.06706	0.858549	0.956482	425	304	844	450	548	470	512	581	511	255	178	202
ENSSSCG00000000293	chr5	19586746	19610362	-	ITGA5	100155091	ENSSSCT00000000314;ENSSSCT00000075947;ENSSSCT00000090750;ENSSSCT00000070939	GO:0001525(angiogenesis);GO:0005178(integrin binding);GO:0005783(endoplasmic reticulum);GO:0005794(Golgi apparatus);GO:0005886(plasma membrane);GO:0005911(cell-cell junction);GO:0005925(focal adhesion);GO:0007044(cell-substrate junction assembly);GO:0007155(cell adhesion);GO:0007157(heterophilic cell-cell adhesion via plasma membrane cell adhesion molecules);GO:0007159(leukocyte cell-cell adhesio…	04145(Phagosome);04151(PI3K-Akt signaling pathway);04510(Focal adhesion);04512(ECM-receptor interaction);04640(Hematopoietic cell lineage);04810(Regulation of actin cytoskeleton);05100(Bacterial invasion of epithelial cells);05133(Pertussis);05135(Yersinia infection);05165(Human papillomavirus infection);05168(Herpes simplex virus 1 infection);05205(Proteoglycans in cancer);05206(MicroRNAs in can…	NA	NA	NA	integrin subunit alpha 5 [Source:VGNC Symbol;Acc:VGNC:89236]	protein_coding	19.0361	11.6787	16.9159	14.9752	16.0307	16.8909	23.2639	18.4564	16.3366	16.1773	14.2993	16.5819	5581	3262	5931	4181	5653	5610	7967	6702	6199	5570	4244	5046
ENSSSCG00000000295	chr5	19677875	19723132	+	NCKAP1L	102162203	ENSSSCT00000000316;ENSSSCT00000085570;ENSSSCT00000096912	GO:0000902(cell morphogenesis);GO:0001782(B cell homeostasis);GO:0002262(myeloid cell homeostasis);GO:0002687(positive regulation of leukocyte migration);GO:0005096(GTPase activator activity);GO:0005829(cytosol);GO:0006935(chemotaxis);GO:0009410(response to xenobiotic stimulus);GO:0016477(cell migration);GO:0030011(maintenance of cell polarity);GO:0030031(cell projection assembly);GO:0030295(prot…	04810(Regulation of actin cytoskeleton);05132(Salmonella infection);05132(Salmonella infection)	NA	NA	NA	NCK associated protein 1 like [Source:VGNC Symbol;Acc:VGNC:90610]	protein_coding	2.91125	1.34462	1.61178	3.08772	3.31016	2.77499	1.75142	1.44991	1.48742	1.36471	0.530458	0.965278	1023	450	678	1034	1398	1104	719	632	677	563	189	352
ENSSSCG00000000297	chr5	19725415	19752888	+	PDE1B	100521662	ENSSSCT00000088733;ENSSSCT00000000318	GO:0001505(regulation of neurotransmitter levels);GO:0001975(response to amphetamine);GO:0004114(3',5'-cyclic-nucleotide phosphodiesterase activity);GO:0004115(3',5'-cyclic-AMP phosphodiesterase activity);GO:0004117(calmodulin-activated dual specificity 3',5'-cyclic-GMP, 3',5'-cyclic-AMP phosphodiesterase activity);GO:0005829(cytosol);GO:0007165(signal transduction);GO:0007626(locomotory behavior…	00230(Purine metabolism);01100(Metabolic pathways);04020(Calcium signaling pathway);04740(Olfactory transduction);04742(Taste transduction);04924(Renin secretion);05032(Morphine addiction);05032(Morphine addiction)	K13755	EC:3.1.4.17	NA	phosphodiesterase 1B [Source:VGNC Symbol;Acc:VGNC:91249]	protein_coding	4.3367	4.08743	2.9793	8.67883	8.05928	5.37688	4.75725	3.50972	4.36982	4.71943	3.2867	3.28117	719	645	591	1368	1605	1009	921	720	937	918	552	564
ENSSSCG00000000298	chr5	19753847	19763269	-	ENSSSCG00000000298		ENSSSCT00000071043;ENSSSCT00000000319;ENSSSCT00000096096	GO:0004864(protein phosphatase inhibitor activity);GO:0005737(cytoplasm);GO:0007165(signal transduction);GO:0035556(intracellular signal transduction);GO:0043086(negative regulation of catalytic activity);GO:0043086(negative regulation of catalytic activity)	04261(Adrenergic signaling in cardiomyocytes);04720(Long-term potentiation);04720(Long-term potentiation)	NA	NA	NA	protein phosphatase 1 regulatory inhibitor subunit 1A [Source:VGNC Symbol;Acc:VGNC:91727]	protein_coding	61.1297	80.239	37.8965	51.0576	49.0244	35.3582	57.0674	78.733	68.2565	49.3841	59.2311	76.6264	4005	5010	2972	3186	3865	2625	4369	6391	5790	3801	3929	5212
ENSSSCG00000000299	chr5	19904237	20017433	-	TESPA1	100153079	ENSSSCT00000042104	GO:0005102(signaling receptor binding);GO:0005829(cytosol);GO:0008180(COP9 signalosome);GO:0010387(COP9 signalosome assembly);GO:0050862(positive regulation of T cell receptor signaling pathway)	NA	NA	NA	NA	thymocyte expressed, positive selection associated 1 [Source:VGNC Symbol;Acc:VGNC:93887]	protein_coding	0.157447	0.022082	0.067683	0.288623	0.123451	0.023462	0.007605	0.073362	0.055306	0.086114	0.023061	0.015292	57	8	30	99	54	10	4	33	26	37	9	6
ENSSSCG00000000359	chr5	21147767	21160735	+	BLOC1S1	100517399	ENSSSCT00000000381	GO:0005758(mitochondrial intermembrane space);GO:0005759(mitochondrial matrix);GO:0005765(lysosomal membrane);GO:0005769(early endosome);GO:0005829(cytosol);GO:0008089(anterograde axonal transport);GO:0009060(aerobic respiration);GO:0016197(endosomal transport);GO:0018394(peptidyl-lysine acetylation);GO:0031083(BLOC-1 complex);GO:0032418(lysosome localization);GO:0048490(anterograde synaptic vesi…	NA	NA	NA	NA	biogenesis of lysosomal organelles complex 1 subunit 1 [Source:HGNC Symbol;Acc:HGNC:4200]	protein_coding	39.2778	45.2972	39.6925	43.1718	47.3319	36.9488	37.5753	41.7436	38.8185	52.4428	46.5359	56.0959	1602	1761	1937	1677	2322	1708	1791	2110	2050	2513	1922	2375
ENSSSCG00000000361	chr5	21172283	21176232	-	CD63	100155929	ENSSSCT00000033233	GO:0002092(positive regulation of receptor internalization);GO:0005576(extracellular region);GO:0005615(extracellular space);GO:0005654(nucleoplasm);GO:0005764(lysosome);GO:0005765(lysosomal membrane);GO:0005768(endosome);GO:0005770(late endosome);GO:0005771(multivesicular body);GO:0005886(plasma membrane);GO:0005887(integral component of plasma membrane);GO:0007160(cell-matrix adhesion);GO:00099…	04142(Lysosome);05205(Proteoglycans in cancer)	NA	NA	NA	CD63 molecule [Source:VGNC Symbol;Acc:VGNC:86424]	protein_coding	287.58	285.051	332.963	394.972	375.99	293.255	284.52	304.609	278.165	347.865	261.302	317.569	16236	15335	22489	21232	25532	18758	18767	21308	20332	23070	14936	18612
ENSSSCG00000000362	chr5	21166510	21170897	+	RDH5	100517586	ENSSSCT00000000384	GO:0001523(retinoid metabolic process);GO:0004745(NAD-retinol dehydrogenase activity);GO:0005788(endoplasmic reticulum lumen);GO:0005789(endoplasmic reticulum membrane);GO:0008202(steroid metabolic process);GO:0016491(oxidoreductase activity);GO:0042803(protein homodimerization activity);GO:0047023(androsterone dehydrogenase activity);GO:0047044(androstan-3-alpha,17-beta-diol dehydrogenase activi…	00830(Retinol metabolism)	K00061	EC:1.1.1.315	NA	retinol dehydrogenase 5 [Source:VGNC Symbol;Acc:VGNC:92191]	protein_coding	151.887	215.578	86.0286	54.6848	58.0974	84.3973	78.4238	87.293	124.902	61.1948	73.6958	170.202	11810	15973	8003	4049	5434	7435	7125	8410	12573	5590	5802	13738
ENSSSCG00000000363	chr5	21191251	21201804	+	GDF11	397254	ENSSSCT00000000386	GO:0001501(skeletal system development);GO:0001656(metanephros development);GO:0001657(ureteric bud development);GO:0005125(cytokine activity);GO:0005576(extracellular region);GO:0005615(extracellular space);GO:0005654(nucleoplasm);GO:0008083(growth factor activity);GO:0008283(cell population proliferation);GO:0008285(negative regulation of cell population proliferation);GO:0009887(animal organ m…	04060(Cytokine-cytokine receptor interaction)	NA	NA	NA	growth differentiation factor 11 [Source:VGNC Symbol;Acc:VGNC:88398]	protein_coding	3.70492	5.09843	5.74381	3.92545	6.76828	22.6953	7.3367	7.7119	3.72182	8.62207	5.09701	5.29661	764	1002	1417	771	1678	5300	1767	1970	994	2088	1064	1134
ENSSSCG00000000364	chr5	21199422	21261876	-	SARNP	100517942	ENSSSCT00000096509;ENSSSCT00000047885;ENSSSCT00000071634;ENSSSCT00000104691;ENSSSCT00000079604;ENSSSCT00000079480	GO:0000122(negative regulation of transcription by RNA polymerase II);GO:0000346(transcription export complex);GO:0003682(chromatin binding);GO:0005634(nucleus);GO:0006406(mRNA export from nucleus);GO:0016607(nuclear speck);GO:0016973(poly(A)+ mRNA export from nucleus);GO:0036464(cytoplasmic ribonucleoprotein granule);GO:0036464(cytoplasmic ribonucleoprotein granule)	NA	NA	NA	NA	SAP domain containing ribonucleoprotein [Source:VGNC Symbol;Acc:VGNC:99729]	protein_coding	6.21445	7.00422	6.26556	5.6898	6.58728	5.74737	6.41356	7.14249	6.92896	6.23717	6.45167	6.62752	1894	2035	2284	1651	2416	1984	2283	2695	2731	2233	1989	2096
ENSSSCG00000000365	chr5	21262193	21264685	+	ORMDL2	100157122	ENSSSCT00000000388	GO:0005783(endoplasmic reticulum);GO:0005789(endoplasmic reticulum membrane);GO:0006629(lipid metabolic process);GO:0006672(ceramide metabolic process);GO:0016020(membrane);GO:0016021(integral component of membrane);GO:0035339(SPOTS complex);GO:0090155(negative regulation of sphingolipid biosynthetic process);GO:0090156(cellular sphingolipid homeostasis);GO:1900060(negative regulation of ceramide…	NA	NA	NA	NA	ORMDL sphingolipid biosynthesis regulator 2 [Source:VGNC Symbol;Acc:VGNC:103307]	protein_coding	29.2349	28.1001	22.9158	20.7984	22.167	20.3195	24.7907	26.3934	31.5032	29.551	23.5073	29.7976	1346	1233	1262	912	1228	1060	1334	1506	1878	1598	1096	1424
ENSSSCG00000000366	chr5	21264664	21272646	-	DNAJC14	100151876	ENSSSCT00000000389	GO:0016020(membrane);GO:0016021(integral component of membrane);GO:0050780(dopamine receptor binding)	NA	NA	NA	NA	DnaJ heat shock protein family (Hsp40) member C14 [Source:NCBI gene (formerly Entrezgene);Acc:100151876]	protein_coding	17.701	18.1596	17.2667	24.3542	23.163	21.2048	18.5808	17.6434	19.0781	17.8478	16.656	16.8196	2627	2569	3066	3442	4135	3566	3222	3245	3666	3112	2503	2592
ENSSSCG00000000367	chr5	21274511	21279335	+	ENSSSCG00000000367		ENSSSCT00000065735	GO:0005886(plasma membrane);GO:0012506(vesicle membrane);GO:0016020(membrane);GO:0016021(integral component of membrane);GO:0090263(positive regulation of canonical Wnt signaling pathway)	NA	NA	NA	NA		protein_coding	10.4627	9.87357	11.447	12.3218	11.3498	10.8278	10.9403	10.687	11.8732	10.6133	10.0728	9.30123	1181	1062	1546	1325	1541	1385	1443	1495	1735	1408	1151	1090
ENSSSCG00000000368	chr5	21280130	21285774	-	MMP19	100518427	ENSSSCT00000000391	GO:0004222(metalloendopeptidase activity);GO:0005615(extracellular space);GO:0006508(proteolysis);GO:0008233(peptidase activity);GO:0008237(metallopeptidase activity);GO:0008270(zinc ion binding);GO:0016787(hydrolase activity);GO:0030198(extracellular matrix organization);GO:0030574(collagen catabolic process);GO:0031012(extracellular matrix);GO:0046872(metal ion binding)	NA	NA	NA	NA	matrix metallopeptidase 19 [Source:VGNC Symbol;Acc:VGNC:90273]	protein_coding	25.6798	24.894	36.2819	30.0107	30.1013	34.1577	46.8569	43.8178	36.4914	26.7599	34.2732	34.4761	1866	1724	3154	2077	2631	2812	3978	3945	3433	2284	2521	2601
ENSSSCG00000000370	chr5	21331682	21355534	+	DGKA	397097	ENSSSCT00000040081;ENSSSCT00000028984;ENSSSCT00000000393	GO:0000166(nucleotide binding);GO:0003951(NAD+ kinase activity);GO:0004143(diacylglycerol kinase activity);GO:0005509(calcium ion binding);GO:0005524(ATP binding);GO:0005543(phospholipid binding);GO:0005829(cytosol);GO:0005886(plasma membrane);GO:0006629(lipid metabolic process);GO:0006654(phosphatidic acid biosynthetic process);GO:0007165(signal transduction);GO:0007205(protein kinase C-activati…	00561(Glycerolipid metabolism);00564(Glycerophospholipid metabolism);01100(Metabolic pathways);04070(Phosphatidylinositol signaling system);04072(Phospholipase D signaling pathway);05231(Choline metabolism in cancer);05231(Choline metabolism in cancer)	K00901	EC:2.7.1.107	NA	diacylglycerol kinase alpha [Source:VGNC Symbol;Acc:VGNC:87269]	protein_coding	3.74891	3.95283	4.27869	4.40456	4.4245	3.2726	3.96473	4.06431	4.95099	4.72507	3.21492	5.18297	555	558	758	621	788	549	686	745	949	822	482	796
ENSSSCG00000000371	chr5	21355619	21364987	-	PMEL	100626164	ENSSSCT00000069189;ENSSSCT00000000394	GO:0005783(endoplasmic reticulum);GO:0005789(endoplasmic reticulum membrane);GO:0005794(Golgi apparatus);GO:0005887(integral component of plasma membrane);GO:0016020(membrane);GO:0016021(integral component of membrane);GO:0032438(melanosome organization);GO:0032585(multivesicular body membrane);GO:0042470(melanosome);GO:0042802(identical protein binding);GO:0042802(identical protein binding)	NA	NA	NA	NA	premelanosome protein [Source:VGNC Symbol;Acc:VGNC:91587]	protein_coding	0	0.149152	0.134485	0.0833023	0.116286	0	0.086111	0.0440372	0.0273442	0.104679	0.155897	0.144349	0	15	17	8	15	0	11	6	4	13	16	16
ENSSSCG00000000376	chr5	21395262	21399710	+	SUOX	100625272	ENSSSCT00000000402	GO:0005783(endoplasmic reticulum);GO:0006790(sulfur compound metabolic process);GO:0008482(sulfite oxidase activity);GO:0016491(oxidoreductase activity);GO:0020037(heme binding);GO:0030151(molybdenum ion binding);GO:0046872(metal ion binding)	00920(Sulfur metabolism);01100(Metabolic pathways)	K00387	EC:1.8.3.1	NA	sulfite oxidase [Source:VGNC Symbol;Acc:VGNC:93621]	protein_coding	7.46069	8.3665	8.76839	15.7345	13.2553	8.7457	11.3372	11.8714	11.2437	11.0332	7.61699	9.59187	807	862	1134	1620	1724	1072	1432	1591	1574	1402	834	1077
ENSSSCG00000000377	chr5	21496025	21504095	+	ENSSSCG00000000377		ENSSSCT00000023025;ENSSSCT00000000403	NA	NA	NA	NA	NA		protein_coding	41.5512	41.6523	43.3668	56.5987	54.9139	46.9539	45.1377	49.5032	45.9145	47.0815	51.271	43.0597	5187	4955	6477	6728	8245	6641	6584	7657	7421	6904	6480	5580
ENSSSCG00000000379	chr5	21514510	21535929	+	ESYT1	100519485	ENSSSCT00000050279;ENSSSCT00000090528;ENSSSCT00000055523	GO:0005509(calcium ion binding);GO:0005544(calcium-dependent phospholipid binding);GO:0005783(endoplasmic reticulum);GO:0005789(endoplasmic reticulum membrane);GO:0005886(plasma membrane);GO:0006869(lipid transport);GO:0008289(lipid binding);GO:0008429(phosphatidylethanolamine binding);GO:0016020(membrane);GO:0016021(integral component of membrane);GO:0030176(integral component of endoplasmic ret…	NA	NA	NA	NA	extended synaptotagmin 1 [Source:VGNC Symbol;Acc:VGNC:87796]	protein_coding	14.7338	13.8202	14.4166	12.3985	13.2362	16.313	19.4124	17.9423	14.2847	14.699	15.6995	14.1538	6814	6090	7976	5460	7363	8548	10488	10281	8553	7985	7350	6795
ENSSSCG00000000382	chr5	21563400	21586737	-	SMARCC2	100157539	ENSSSCT00000032096;ENSSSCT00000049060;ENSSSCT00000000410	GO:0000122(negative regulation of transcription by RNA polymerase II);GO:0003682(chromatin binding);GO:0005654(nucleoplasm);GO:0005694(chromosome);GO:0006355(regulation of DNA-templated transcription);GO:0006357(regulation of transcription by RNA polymerase II);GO:0006366(transcription by RNA polymerase II);GO:0016514(SWI/SNF complex);GO:0042393(histone binding);GO:0045893(positive regulation of …	04714(Thermogenesis);05225(Hepatocellular carcinoma);05225(Hepatocellular carcinoma)	NA	NA	MYB	SWI/SNF related, matrix associated, actin dependent regulator of chromatin subfamily c member 2 [Source:VGNC Symbol;Acc:VGNC:93232]	protein_coding	23.7828	23.0827	22.4374	27.9083	26.8918	22.2317	21.881	19.5994	17.7409	26.6975	18.7158	23.4901	6591	6095	7438	7362	8962	6979	7084	6729	6364	8690	5252	6757
ENSSSCG00000000383	chr5	21596306	21624569	-	RNF41	100157936	ENSSSCT00000045000;ENSSSCT00000047640	GO:0000209(protein polyubiquitination);GO:0004842(ubiquitin-protein transferase activity);GO:0005128(erythropoietin receptor binding);GO:0005135(interleukin-3 receptor binding);GO:0008285(negative regulation of cell population proliferation);GO:0010498(proteasomal protein catabolic process);GO:0016567(protein ubiquitination);GO:0016740(transferase activity);GO:0019904(protein domain specific bind…	04144(Endocytosis);04144(Endocytosis)	K11981	EC:2.3.2.27	NA	ring finger protein 41 [Source:VGNC Symbol;Acc:VGNC:92394]	protein_coding	8.27102	6.91681	8.86942	8.82495	6.8666	4.95397	9.7549	8.04535	7.94868	7.88176	5.90751	6.38358	1219	971	1563	1238	1216	828	1679	1469	1516	1363	881	976
ENSSSCG00000000384	chr5	21624762	21631706	+	NABP2	100154321	ENSSSCT00000061313	GO:0000724(double-strand break repair via homologous recombination);GO:0000781(chromosome, telomeric region);GO:0003676(nucleic acid binding);GO:0003677(DNA binding);GO:0003697(single-stranded DNA binding);GO:0005634(nucleus);GO:0005654(nucleoplasm);GO:0005829(cytosol);GO:0006281(DNA repair);GO:0006974(cellular response to DNA damage stimulus);GO:0010212(response to ionizing radiation);GO:0031090…	NA	NA	NA	NA	nucleic acid binding protein 2 [Source:VGNC Symbol;Acc:VGNC:90561]	protein_coding	16.3337	16.7758	16.906	15.494	15.1625	16.3809	17.7328	16.7948	15.8367	18.1086	16.0393	17.8805	1540	1507	1906	1391	1719	1749	1953	1961	1933	2005	1531	1750
ENSSSCG00000000385	chr5	21631924	21637646	+	SLC39A5	100155542	ENSSSCT00000103517;ENSSSCT00000000413;ENSSSCT00000046133	GO:0001654(eye development);GO:0005385(zinc ion transmembrane transporter activity);GO:0005887(integral component of plasma membrane);GO:0006882(cellular zinc ion homeostasis);GO:0016020(membrane);GO:0016021(integral component of membrane);GO:0016323(basolateral plasma membrane);GO:0030001(metal ion transport);GO:0030509(BMP signaling pathway);GO:0034224(cellular response to zinc ion starvation);…	NA	NA	NA	NA	solute carrier family 39 member 5 [Source:VGNC Symbol;Acc:VGNC:93106]	protein_coding	0.27428	0.427425	0.108926	1.04565	0.41439	0.309464	0.121598	0.196241	0.54862	0.504351	0.274603	0.436711	28	42	13	99	50	35	15	25	71	59	29	45
ENSSSCG00000000386	chr5	21637613	21657045	-	ANKRD52	100519313	ENSSSCT00000044069	NA	NA	NA	NA	NA	ankyrin repeat domain 52 [Source:VGNC Symbol;Acc:VGNC:85342]	protein_coding	4.25956	3.60854	3.83805	3.72835	3.35723	3.29377	3.98299	3.63428	2.67564	3.15014	3.16267	2.50229	1386	1119	1495	1156	1314	1215	1515	1466	1128	1205	1042	846
ENSSSCG00000000393	chr5	21712261	21727903	-	PAN2	100153107,57665,147945	ENSSSCT00000038548	GO:0000175(3'-5'-exoribonuclease activity);GO:0000288(nuclear-transcribed mRNA catabolic process, deadenylation-dependent decay);GO:0000289(nuclear-transcribed mRNA poly(A) tail shortening);GO:0000932(P-body);GO:0003676(nucleic acid binding);GO:0004518(nuclease activity);GO:0004527(exonuclease activity);GO:0004535(poly(A)-specific ribonuclease activity);GO:0005634(nucleus);GO:0005737(cytoplasm);G…	03018(RNA degradation)	K12571	EC:3.1.13.4	NA	poly(A) specific ribonuclease subunit PAN2 [Source:HGNC Symbol;Acc:HGNC:20074]	protein_coding	17.2144	23.5443	10.7599	15.9639	15.7839	15.8829	15.5015	15.5933	17.5291	17.0586	15.4291	20.7905	3767	4910	2817	3327	4155	3938	3964	4228	4966	4385	3419	4723
ENSSSCG00000000394	chr5	21707834	21711292	-	CNPY2	100151912	ENSSSCT00000000425	GO:0005783(endoplasmic reticulum);GO:0010629(negative regulation of gene expression);GO:0010988(regulation of low-density lipoprotein particle clearance);GO:1905599(positive regulation of low-density lipoprotein receptor activity)	NA	NA	NA	NA	canopy FGF signaling regulator 2 [Source:NCBI gene (formerly Entrezgene);Acc:100151912]	protein_coding	23.0173	19.4386	24.6309	18.9816	18.1287	15.9408	27.4258	23.9952	21.4816	21.2442	17.2703	21.0869	1351	1088	1730	1061	1280	1061	1881	1746	1633	1465	1027	1285
ENSSSCG00000000396	chr5	21733035	21751354	-	STAT2	396923	ENSSSCT00000000428	GO:0000978(RNA polymerase II cis-regulatory region sequence-specific DNA binding);GO:0000981(DNA-binding transcription factor activity, RNA polymerase II-specific);GO:0001932(regulation of protein phosphorylation);GO:0003677(DNA binding);GO:0003700(DNA-binding transcription factor activity);GO:0005634(nucleus);GO:0005737(cytoplasm);GO:0005829(cytosol);GO:0005886(plasma membrane);GO:0006355(regula…	04062(Chemokine signaling pathway);04217(Necroptosis);04380(Osteoclast differentiation);04621(NOD-like receptor signaling pathway);04625(C-type lectin receptor signaling pathway);04630(JAK-STAT signaling pathway);05160(Hepatitis C);05161(Hepatitis B);05162(Measles);05164(Influenza A);05165(Human papillomavirus infection);05167(Kaposi sarcoma-associated herpesvirus infection);05168(Herpes simplex …	NA	NA	STAT	signal transducer and activator of transcription 2 [Source:VGNC Symbol;Acc:VGNC:93539]	protein_coding	21.608	23.0973	23.8146	25.8662	24.5191	18.3277	16.078	16.4988	14.939	17.4793	13.665	16.1218	5802	5910	7651	6613	7919	5576	5044	5489	5194	5514	3715	4494
ENSSSCG00000000398	chr5	21759475	21760815	-	APOF	445462	ENSSSCT00000000430	GO:0005615(extracellular space);GO:0008203(cholesterol metabolic process)	NA	NA	NA	NA	apolipoprotein F [Source:NCBI gene (formerly Entrezgene);Acc:445462]	protein_coding	1.05802	0.688303	1.16809	0.26679	0.6332	0.683321	0.327235	0.882652	0.454643	0.654484	0.532861	0.659635	61	38	81	15	44	45	22	63	34	45	31	40
ENSSSCG00000000399	chr5	21763014	21787521	-	TIMELESS		ENSSSCT00000000431	GO:0000076(DNA replication checkpoint signaling);GO:0000122(negative regulation of transcription by RNA polymerase II);GO:0000785(chromatin);GO:0002009(morphogenesis of an epithelium);GO:0003677(DNA binding);GO:0005634(nucleus);GO:0005654(nucleoplasm);GO:0006281(DNA repair);GO:0006974(cellular response to DNA damage stimulus);GO:0007623(circadian rhythm);GO:0030324(lung development);GO:0031298(re…	NA	NA	NA	NA	timeless circadian regulator [Source:HGNC Symbol;Acc:HGNC:11813]	protein_coding	1.37855	0.61267	1.08637	0.292661	0.290987	0.978342	0.583813	0.985332	0.503189	0.482802	0.862107	0.927624	258	110	244	53	66	208	128	229	122	107	164	181
ENSSSCG00000000400	chr5	21787826	21793592	-	MIP	100522373,3842,4285,727764	ENSSSCT00000000432	GO:0002088(lens development in camera-type eye);GO:0005212(structural constituent of eye lens);GO:0005783(endoplasmic reticulum);GO:0005886(plasma membrane);GO:0006833(water transport);GO:0007601(visual perception);GO:0015250(water channel activity);GO:0015267(channel activity);GO:0016020(membrane);GO:0016021(integral component of membrane);GO:0016324(apical plasma membrane);GO:0045785(positive r…	NA	NA	NA	NA	major intrinsic protein of lens fiber [Source:VGNC Symbol;Acc:VGNC:90235]	protein_coding	0	0	0.031038	0	0	0	0	0	0	0	0	0	0	0	4	0	0	0	0	0	0	0	0	0
ENSSSCG00000000401	chr5	21806406	21820001	-	GLS2	100738224	ENSSSCT00000000433	GO:0004359(glutaminase activity);GO:0005739(mitochondrion);GO:0006541(glutamine metabolic process);GO:0016787(hydrolase activity);GO:0042981(regulation of apoptotic process);GO:0072593(reactive oxygen species metabolic process)	00220(Arginine biosynthesis);00250(Alanine, aspartate and glutamate metabolism);00471(D-Glutamine and D-glutamate metabolism);01100(Metabolic pathways);04724(Glutamatergic synapse);04727(GABAergic synapse);04964(Proximal tubule bicarbonate reclamation);05206(MicroRNAs in cancer);05230(Central carbon metabolism in cancer)	K01425	EC:3.5.1.2	NA	glutaminase 2 [Source:VGNC Symbol;Acc:VGNC:88497]	protein_coding	0.1261	0.165429	0.244324	0.042458	0.152581	0.070441	0.089475	0.153759	0.163774	0.110317	0.059484	0.10102	18	22	40	6	25	11	15	26	29	18	9	15
ENSSSCG00000000402	chr5	21868121	21932600	+	RBMS2	100522738	ENSSSCT00000046407;ENSSSCT00000061336;ENSSSCT00000060088	GO:0003676(nucleic acid binding);GO:0003723(RNA binding);GO:0003730(mRNA 3'-UTR binding);GO:0005634(nucleus);GO:0005829(cytosol);GO:0008143(poly(A) binding);GO:0008266(poly(U) RNA binding);GO:1990904(ribonucleoprotein complex);GO:1990904(ribonucleoprotein complex)	NA	NA	NA	NA	RNA binding motif single stranded interacting protein 2 [Source:VGNC Symbol;Acc:VGNC:98286]	protein_coding	8.19634	4.07049	6.11562	8.17201	7.55606	8.23711	6.70081	5.92446	6.054	9.437	5.93709	6.84857	2525	1195	2253	2397	2800	2874	2412	2262	2415	3414	1852	2190
ENSSSCG00000000403	chr5	21936260	21983021	-	BAZ2A	100153516	ENSSSCT00000049648;ENSSSCT00000055700	GO:0003677(DNA binding);GO:0005634(nucleus);GO:0005829(cytosol);GO:0016607(nuclear speck);GO:0043229(intracellular organelle);GO:0046872(metal ion binding);GO:0046872(metal ion binding)	NA	NA	NA	MBD	bromodomain adjacent to zinc finger domain 2A [Source:VGNC Symbol;Acc:VGNC:85763]	protein_coding	8.13428	8.8123	6.13941	15.6297	14.3465	6.01663	7.05938	6.81452	7.17166	7.75012	6.69644	6.67292	2449	2529	2212	4481	5196	2053	2484	2542	2796	2741	2041	2086
ENSSSCG00000000405	chr5	21984584	21992606	-	ENSSSCG00000000405		ENSSSCT00000033906;ENSSSCT00000054562	GO:0000166(nucleotide binding);GO:0005524(ATP binding);GO:0005737(cytoplasm);GO:0005753(mitochondrial proton-transporting ATP synthase complex);GO:0006754(ATP biosynthetic process);GO:0006811(ion transport);GO:0015986(proton motive force-driven ATP synthesis);GO:0016020(membrane);GO:0042776(proton motive force-driven mitochondrial ATP synthesis);GO:0045261(proton-transporting ATP synthase complex…	00190(Oxidative phosphorylation);01100(Metabolic pathways);04714(Thermogenesis);05010(Alzheimer disease);05012(Parkinson disease);05014(Amyotrophic lateral sclerosis);05016(Huntington disease);05020(Prion disease);05022(Pathways of neurodegeneration - multiple diseases);05022(Pathways of neurodegeneration - multiple diseases)	K02133	EC:7.1.2.2	NA		protein_coding	411.205	368.559	417.642	263.234	289.775	382.622	431.122	517.817	473.72	299.474	629.501	424.472	43902	37497	53346	26760	37212	46283	53779	68499	65480	37559	68044	47046
ENSSSCG00000000406	chr5	22000341	22021660	-	PTGES3	100155956	ENSSSCT00000000439;ENSSSCT00000079358;ENSSSCT00000068317	GO:0001516(prostaglandin biosynthetic process);GO:0003720(telomerase activity);GO:0005634(nucleus);GO:0005697(telomerase holoenzyme complex);GO:0005829(cytosol);GO:0005978(glycogen biosynthetic process);GO:0006457(protein folding);GO:0007004(telomere maintenance via telomerase);GO:0032991(protein-containing complex);GO:0042327(positive regulation of phosphorylation);GO:0042921(glucocorticoid rece…	00590(Arachidonic acid metabolism);01100(Metabolic pathways);01100(Metabolic pathways)	K15730	EC:5.3.99.3	NA	prostaglandin E synthase 3 [Source:VGNC Symbol;Acc:VGNC:91952]	protein_coding	22.5646	19.8186	15.264	14.3495	15.4095	21.4755	21.5741	21.2703	25.707	20.2593	17.6467	20.1905	5444	4557	4405	3296	4471	5869	6080	6356	8028	5741	4310	5056
ENSSSCG00000000411	chr5	22400277	22406419	+	NAB2	100157578	ENSSSCT00000000460	GO:0001958(endochondral ossification);GO:0003712(transcription coregulator activity);GO:0005634(nucleus);GO:0006355(regulation of DNA-templated transcription);GO:0014037(Schwann cell differentiation);GO:0016480(negative regulation of transcription by RNA polymerase III);GO:0042552(myelination);GO:0042802(identical protein binding);GO:0045682(regulation of epidermis development);GO:0045892(negativ…	NA	NA	NA	NA	NGFI-A binding protein 2 [Source:VGNC Symbol;Acc:VGNC:90560]	protein_coding	5.32022	3.82147	4.62031	4.45609	3.83727	3.95857	4.60265	4.72226	3.57866	3.82933	3.71592	3.17908	657	450	683	524	570	554	664	723	572	556	465	408
ENSSSCG00000000413	chr5	22338029	22363568	-	MYO1A	100739662	ENSSSCT00000052338	GO:0000146(microfilament motor activity);GO:0000166(nucleotide binding);GO:0003774(cytoskeletal motor activity);GO:0003779(actin binding);GO:0005524(ATP binding);GO:0005737(cytoplasm);GO:0005886(plasma membrane);GO:0005902(microvillus);GO:0005903(brush border);GO:0007015(actin filament organization);GO:0007605(sensory perception of sound);GO:0009925(basal plasma membrane);GO:0015629(actin cytoske…	NA	NA	NA	NA	myosin IA [Source:VGNC Symbol;Acc:VGNC:90525]	protein_coding	0.0517756	0.284703	0.0741361	0.0321006	0.161317	0.149827	0.0330671	0	0.0906827	0.097998	0.0533967	0.043132	10	51	17	6	37	32	8	0	22	22	11	9
ENSSSCG00000000415	chr5	22228042	22244528	-	SDR9C7	100626104	ENSSSCT00000000449	GO:0004745(NAD-retinol dehydrogenase activity);GO:0016491(oxidoreductase activity)	NA	NA	NA	NA	short chain dehydrogenase/reductase family 9C member 7 [Source:VGNC Symbol;Acc:VGNC:92664]	protein_coding	1.55883	2.44211	1.25032	1.23847	1.00238	1.02826	1.53822	1.886	1.36369	2.10535	0.656151	1.11355	155	232	149	118	120	116	179	233	176	246	66	115
ENSSSCG00000000419	chr5	22286537	22292433	-	ENSSSCG00000000419		ENSSSCT00000056102;ENSSSCT00000038718	NA	00830(Retinol metabolism);01100(Metabolic pathways);01100(Metabolic pathways)	NA	NA	NA		protein_coding	17.204	0.544641	12.0453	13.0989	12.4712	16.7017	18.109	16.4788	10.8891	39.1194	19.9263	23.6074	1465	45	1227	1062	1277	1611	1801	1738	1200	3911	1717	2086
ENSSSCG00000000431	chr5	22791437	22799126	+	MBD6	100518908	ENSSSCT00000000465	GO:0001650(fibrillar center);GO:0003677(DNA binding);GO:0003682(chromatin binding);GO:0005634(nucleus);GO:0005654(nucleoplasm);GO:0010369(chromocenter)	NA	NA	NA	NA	methyl-CpG binding domain protein 6 [Source:VGNC Symbol;Acc:VGNC:90051]	protein_coding	7.63504	11.1332	7.05839	8.41901	8.12031	7.65118	8.33501	7.20571	7.68441	9.37286	6.33757	6.78911	1451	2016	1605	1524	1856	1647	1851	1697	1891	2092	1220	1340
ENSSSCG00000000433	chr5	22889656	22897508	-	B4GALNT1	100516440	ENSSSCT00000038833;ENSSSCT00000079691	GO:0000139(Golgi membrane);GO:0001574(ganglioside biosynthetic process);GO:0003947((N-acetylneuraminyl)-galactosylglucosylceramide N-acetylgalactosaminyltransferase activity);GO:0005794(Golgi apparatus);GO:0006687(glycosphingolipid metabolic process);GO:0007283(spermatogenesis);GO:0016020(membrane);GO:0016021(integral component of membrane);GO:0016740(transferase activity);GO:0016757(glycosyltran…	00604(Glycosphingolipid biosynthesis - ganglio series);01100(Metabolic pathways);01100(Metabolic pathways)	K00725	EC:2.4.1.92	NA	beta-1,4-N-acetyl-galactosaminyltransferase 1 [Source:VGNC Symbol;Acc:VGNC:85730]	protein_coding	5.51442	3.27779	13.2074	6.22625	6.04273	4.91438	7.11357	6.99543	4.34812	3.75318	3.8984	4.49097	670	380	1919	720	883	676	1010	1053	684	536	480	566
ENSSSCG00000000435	chr5	22873801	22880827	+	ARHGEF25	100517400	ENSSSCT00000038624;ENSSSCT00000000476;ENSSSCT00000057246	GO:0005085(guanyl-nucleotide exchange factor activity);GO:0005737(cytoplasm);GO:0005886(plasma membrane);GO:0007411(axon guidance);GO:0019898(extrinsic component of membrane);GO:0035023(regulation of Rho protein signal transduction);GO:0050790(regulation of catalytic activity);GO:0050790(regulation of catalytic activity)	NA	NA	NA	NA	Rho guanine nucleotide exchange factor 25 [Source:VGNC Symbol;Acc:VGNC:103216]	protein_coding	14.8716	10.4698	13.6492	8.07494	9.27773	8.21352	12.7877	12.3222	8.32211	9.45134	7.59916	7.1753	1720	1154	1889	889	1290	1078	1728	1766	1247	1284	891	862
ENSSSCG00000000436	chr5	22854316	22867028	+	PIP4K2C	100520306	ENSSSCT00000075918;ENSSSCT00000000471	GO:0000166(nucleotide binding);GO:0005524(ATP binding);GO:0005654(nucleoplasm);GO:0005776(autophagosome);GO:0005829(cytosol);GO:0005886(plasma membrane);GO:0010506(regulation of autophagy);GO:0016301(kinase activity);GO:0016307(phosphatidylinositol phosphate kinase activity);GO:0016308(1-phosphatidylinositol-4-phosphate 5-kinase activity);GO:0016310(phosphorylation);GO:0016740(transferase activit…	00562(Inositol phosphate metabolism);01100(Metabolic pathways);04070(Phosphatidylinositol signaling system);04810(Regulation of actin cytoskeleton);04810(Regulation of actin cytoskeleton)	K00920	EC:2.7.1.149	NA	phosphatidylinositol-5-phosphate 4-kinase type 2 gamma [Source:VGNC Symbol;Acc:VGNC:91455]	protein_coding	9.3628	10.7307	11.9432	13.1681	11.1632	11.2928	10.452	11.3568	10.6413	12.1336	10.1101	10.2243	1283	1401	1958	1718	1840	1753	1673	1929	1888	1953	1402	1454
ENSSSCG00000000437	chr5	22747339	22762049	-	ARHGAP9	100518732	ENSSSCT00000000472	GO:0005096(GTPase activator activity);GO:0005547(phosphatidylinositol-3,4,5-trisphosphate binding);GO:0005737(cytoplasm);GO:0007165(signal transduction);GO:0043087(regulation of GTPase activity);GO:0050790(regulation of catalytic activity)	NA	NA	NA	NA	Rho GTPase activating protein 9 [Source:VGNC Symbol;Acc:VGNC:85482]	protein_coding	1.63056	1.03296	1.18351	2.20639	1.60381	1.28504	1.04545	1.01244	1.33664	1.577	0.619585	1.32605	234	142	203	301	277	209	175	180	248	266	90	198
ENSSSCG00000000439	chr5	22816854	22851973	+	KIF5A	100519957	ENSSSCT00000050706;ENSSSCT00000094635;ENSSSCT00000048574	GO:0000166(nucleotide binding);GO:0003777(microtubule motor activity);GO:0005524(ATP binding);GO:0005737(cytoplasm);GO:0005874(microtubule);GO:0007018(microtubule-based movement);GO:0008017(microtubule binding);GO:0016192(vesicle-mediated transport);GO:0019894(kinesin binding);GO:0032839(dendrite cytoplasm);GO:0035253(ciliary rootlet);GO:0043005(neuron projection);GO:0043025(neuronal cell body);G…	04144(Endocytosis);04728(Dopaminergic synapse);05010(Alzheimer disease);05012(Parkinson disease);05014(Amyotrophic lateral sclerosis);05016(Huntington disease);05020(Prion disease);05022(Pathways of neurodegeneration - multiple diseases);05132(Salmonella infection);05223(Non-small cell lung cancer);05223(Non-small cell lung cancer)	NA	NA	NA	kinesin family member 5A [Source:VGNC Symbol;Acc:VGNC:89472]	protein_coding	1.38628	1.18753	0.794127	0.0875828	0.247951	0.745877	0.696822	0.52413	0.949392	0.711402	0.913555	0.832122	449	367	308	27	97	274	264	211	398	271	299	280
ENSSSCG00000000443	chr5	22739900	22747421	+	GLI1	100520490	ENSSSCT00000059480	GO:0000976(transcription cis-regulatory region binding);GO:0000977(RNA polymerase II transcription regulatory region sequence-specific DNA binding);GO:0000978(RNA polymerase II cis-regulatory region sequence-specific DNA binding);GO:0000981(DNA-binding transcription factor activity, RNA polymerase II-specific);GO:0001649(osteoblast differentiation);GO:0003677(DNA binding);GO:0003682(chromatin bin…	04024(cAMP signaling pathway);04340(Hedgehog signaling pathway);05200(Pathways in cancer);05217(Basal cell carcinoma)	NA	NA	zf-C2H2	GLI family zinc finger 1 [Source:VGNC Symbol;Acc:VGNC:88482]	protein_coding	1.4271	0.977136	0.589054	0.935123	0.758541	0.243699	0.756691	1.00691	0.445614	0.496242	0.884249	0.36906	243	159	120	152	156	47	151	213	99	100	153	66
ENSSSCG00000000444	chr5	22799287	22814362	-	DCTN2	100515661	ENSSSCT00000000464;ENSSSCT00000000479;ENSSSCT00000068109;ENSSSCT00000081952;ENSSSCT00000085722;ENSSSCT00000105819	GO:0000776(kinetochore);GO:0005737(cytoplasm);GO:0005813(centrosome);GO:0005829(cytosol);GO:0005869(dynactin complex);GO:0007017(microtubule-based process);GO:0007052(mitotic spindle organization);GO:0007080(mitotic metaphase plate congression);GO:0019901(protein kinase binding);GO:0030286(dynein complex);GO:0030426(growth cone);GO:0030507(spectrin binding);GO:0031982(vesicle);GO:0032402(melanoso…	04962(Vasopressin-regulated water reabsorption);05014(Amyotrophic lateral sclerosis);05016(Huntington disease);05022(Pathways of neurodegeneration - multiple diseases);05132(Salmonella infection);05132(Salmonella infection)	NA	NA	NA	dynactin subunit 2 [Source:VGNC Symbol;Acc:VGNC:87193]	protein_coding	170.264	190.444	183.852	233.464	222.074	163.049	151.111	140.18	163.209	189.377	153.555	199.257	15894	16941	20531	20749	24931	17244	16479	16212	19723	20765	14511	19306
ENSSSCG00000000449	chr5	22867711	22873393	+	DTX3	100620343	ENSSSCT00000029673	GO:0005737(cytoplasm);GO:0007219(Notch signaling pathway);GO:0016567(protein ubiquitination);GO:0016740(transferase activity);GO:0046872(metal ion binding);GO:0061630(ubiquitin protein ligase activity)	04330(Notch signaling pathway)	K06058	EC:2.3.2.27	NA	deltex E3 ubiquitin ligase 3 [Source:VGNC Symbol;Acc:VGNC:87468]	protein_coding	21.635	26.5538	17.0007	23.0357	19.5292	15.0193	18.5694	14.1136	16.818	18.2034	12.7655	20.0766	2094	2449	1969	2123	2273	1647	2100	1693	2107	2070	1251	2017
ENSSSCG00000000453	chr5	23233895	23276036	+	ATP23	100737094	ENSSSCT00000000489	GO:0004222(metalloendopeptidase activity);GO:0005829(cytosol);GO:0005886(plasma membrane);GO:0006508(proteolysis);GO:0008233(peptidase activity);GO:0008237(metallopeptidase activity);GO:0016787(hydrolase activity);GO:0030054(cell junction);GO:0031314(extrinsic component of mitochondrial inner membrane);GO:0033615(mitochondrial proton-transporting ATP synthase complex assembly);GO:0034982(mitochon…	NA	NA	NA	NA	ATP23 metallopeptidase and ATP synthase assembly factor homolog [Source:VGNC Symbol;Acc:VGNC:85645]	protein_coding	5.03792	5.43563	5.151	4.03366	4.15842	3.25969	4.45404	6.08875	4.26593	2.87032	5.79579	5.89907	328	337	401	250	325	240	338	490	359	219	382	398
ENSSSCG00000000455	chr5	24066623	24117970	-	LRIG3	100155928	ENSSSCT00000000491	GO:0005615(extracellular space);GO:0016020(membrane);GO:0016021(integral component of membrane);GO:0031012(extracellular matrix);GO:0032474(otolith morphogenesis)	NA	NA	NA	NA	leucine rich repeats and immunoglobulin like domains 3 [Source:VGNC Symbol;Acc:VGNC:89812]	protein_coding	9.60741	9.58623	13.907	14.6914	11.6652	6.83778	8.67412	9.36994	7.99834	7.67001	6.93789	10.1192	1868	1777	3235	2720	2728	1507	1971	2258	2014	1752	1366	2043
ENSSSCG00000000456	chr5	24713267	24875003	+	SLC16A7	100158241	ENSSSCT00000000492	GO:0005654(nucleoplasm);GO:0005886(plasma membrane);GO:0005887(integral component of plasma membrane);GO:0008028(monocarboxylic acid transmembrane transporter activity);GO:0015129(lactate transmembrane transporter activity);GO:0015718(monocarboxylic acid transport);GO:0016020(membrane);GO:0016021(integral component of membrane);GO:0022857(transmembrane transporter activity);GO:0035873(lactate tra…	NA	NA	NA	NA	solute carrier family 16 member 7 [Source:VGNC Symbol;Acc:VGNC:92947]	protein_coding	4.03416	3.52043	5.91813	3.69589	4.41341	5.99775	3.93662	5.48617	5.20663	4.93058	7.24418	3.77052	1425	1185	2500	1243	1875	2400	1624	2401	2380	2045	2590	1382
ENSSSCG00000000457	chr5	26964553	27097444	+	USP15	100524085	ENSSSCT00000092162;ENSSSCT00000000493;ENSSSCT00000094355;ENSSSCT00000101907;ENSSSCT00000099492;ENSSSCT00000069424;ENSSSCT00000030942	GO:0003824(catalytic activity);GO:0004197(cysteine-type endopeptidase activity);GO:0004843(cysteine-type deubiquitinase activity);GO:0005160(transforming growth factor beta receptor binding);GO:0005634(nucleus);GO:0005654(nucleoplasm);GO:0005737(cytoplasm);GO:0005829(cytosol);GO:0006508(proteolysis);GO:0006511(ubiquitin-dependent protein catabolic process);GO:0006807(nitrogen compound metabolic p…	04137(Mitophagy - animal);04137(Mitophagy - animal)	K21343	EC:3.4.19.12	NA	ubiquitin specific peptidase 15 [Source:VGNC Symbol;Acc:VGNC:94748]	protein_coding	1.87624	2.24039	1.68199	1.99739	1.83002	1.70496	1.85219	2.19544	1.92858	1.66837	1.85146	1.69217	1320	1502	1416	1338	1550	1359	1521	1912	1758	1381	1319	1236
ENSSSCG00000000458	chr5	27126130	27242399	+	MON2	100154568	ENSSSCT00000041357;ENSSSCT00000050175;ENSSSCT00000106817;ENSSSCT00000047696;ENSSSCT00000039671	GO:0015031(protein transport);GO:0031901(early endosome membrane);GO:0031901(early endosome membrane)	NA	NA	NA	NA	MON2 homolog, regulator of endosome-to-Golgi trafficking [Source:VGNC Symbol;Acc:VGNC:90301]	protein_coding	6.17857	5.05807	7.36287	6.538	5.63984	5.30245	5.53846	6.12134	5.00317	4.85265	5.71023	5.92041	2481	1936	3538	2500	2725	2413	2599	3046	2601	2290	2322	2469
ENSSSCG00000000462	chr5	28247412	28276273	+	RXYLT1	100155789	ENSSSCT00000000500	GO:0005654(nucleoplasm);GO:0005794(Golgi apparatus);GO:0016740(transferase activity);GO:0035269(protein O-linked mannosylation);GO:0120053(ribitol beta-1,4-xylosyltransferase activity)	00515(Mannose type O-glycan biosynthesis);01100(Metabolic pathways)	K21052	EC:2.4.2.61	NA	ribitol xylosyltransferase 1 [Source:VGNC Symbol;Acc:VGNC:92531]	protein_coding	5.09754	3.44294	6.51429	8.04945	6.91586	6.55297	6.91833	5.84895	5.00033	7.14279	4.58303	5.39257	403	259	615	605	657	586	638	572	511	662	367	442
ENSSSCG00000000464	chr5	28716358	28817810	-	C12orf56		ENSSSCT00000030713	NA	NA	NA	NA	NA	chromosome 5 C12orf56 homolog [Source:VGNC Symbol;Acc:VGNC:86044]	protein_coding	0	0.048257	0	0	0	0	0	0.015528	0	0	0	0	0	5	0	0	0	0	0	2	0	0	0	0
ENSSSCG00000000466	chr5	28829551	28875325	+	XPOT	100511016	ENSSSCT00000065895;ENSSSCT00000000504;ENSSSCT00000089666;ENSSSCT00000049535	GO:0000049(tRNA binding);GO:0003723(RNA binding);GO:0005634(nucleus);GO:0005643(nuclear pore);GO:0005654(nucleoplasm);GO:0005737(cytoplasm);GO:0005829(cytosol);GO:0006409(tRNA export from nucleus);GO:0006886(intracellular protein transport);GO:0006913(nucleocytoplasmic transport);GO:0016363(nuclear matrix);GO:0031267(small GTPase binding);GO:0033036(macromolecule localization);GO:0071528(tRNA re-…	03013(RNA transport);03013(RNA transport)	NA	NA	NA	exportin for tRNA [Source:VGNC Symbol;Acc:VGNC:95008]	protein_coding	22.288	21.9974	21.4264	29.8391	28.1204	20.5373	20.1898	19.8494	21.8097	22.4903	22.1559	22.9778	7289	6855	8381	9289	11059	7608	7714	8043	9233	8639	7335	7799
ENSSSCG00000000469	chr5	29596334	29672698	+	LEMD3	100511508	ENSSSCT00000037587	GO:0003676(nucleic acid binding);GO:0005634(nucleus);GO:0005637(nuclear inner membrane);GO:0005639(integral component of nuclear inner membrane);GO:0006997(nucleus organization);GO:0006998(nuclear envelope organization);GO:0012505(endomembrane system);GO:0016020(membrane);GO:0016021(integral component of membrane);GO:0030512(negative regulation of transforming growth factor beta receptor signalin…	NA	NA	NA	NA	LEM domain containing 3 [Source:VGNC Symbol;Acc:VGNC:89679]	protein_coding	4.46975	3.55595	4.65957	4.27495	3.91278	3.37935	3.69583	4.19865	3.96167	3.73194	3.73863	3.46606	1045	793	1303	952	1100	895	1010	1216	1199	1025	885	841
ENSSSCG00000000473	chr5	30488451	30511533	-	TMBIM4	100738459	ENSSSCT00000071982;ENSSSCT00000072532;ENSSSCT00000090819	GO:0005795(Golgi stack);GO:0016020(membrane);GO:0016021(integral component of membrane);GO:0043066(negative regulation of apoptotic process);GO:0050848(regulation of calcium-mediated signaling);GO:0050848(regulation of calcium-mediated signaling)	NA	NA	NA	NA	transmembrane BAX inhibitor motif containing 4 [Source:HGNC Symbol;Acc:HGNC:24257]	protein_coding	20.289	22.0692	21.2403	25.7427	24.3496	24.7623	19.183	21.241	21.3904	22.1909	21.8859	20.6826	3036	3148	3802	3668	4382	4197	3355	3938	4144	3901	3315	3213
ENSSSCG00000000475	chr5	30526793	30609921	+	IRAK3	100514645	ENSSSCT00000077997	GO:0000287(magnesium ion binding);GO:0001819(positive regulation of cytokine production);GO:0002755(MyD88-dependent toll-like receptor signaling pathway);GO:0004672(protein kinase activity);GO:0004674(protein serine/threonine kinase activity);GO:0005524(ATP binding);GO:0005634(nucleus);GO:0005737(cytoplasm);GO:0005886(plasma membrane);GO:0006468(protein phosphorylation);GO:0007165(signal transduc…	04722(Neurotrophin signaling pathway)	K04732	EC:2.7.11.1	NA	interleukin 1 receptor associated kinase 3 [Source:VGNC Symbol;Acc:VGNC:89201]	protein_coding	1.50654	2.00321	1.862	2.03597	2.5763	1.47939	1.57969	1.28081	1.24045	1.81916	1.386	2.10111	659	835	974	848	1355	733	807	694	702	934	614	954
ENSSSCG00000000477	chr5	30645656	30697232	+	HELB	100514840	ENSSSCT00000052520	GO:0000462(maturation of SSU-rRNA from tricistronic rRNA transcript (SSU-rRNA, 5.8S rRNA, LSU-rRNA));GO:0003678(DNA helicase activity);GO:0003723(RNA binding);GO:0004386(helicase activity);GO:0005634(nucleus);GO:0005654(nucleoplasm);GO:0005662(DNA replication factor A complex);GO:0005730(nucleolus);GO:0005737(cytoplasm);GO:0005886(plasma membrane);GO:0006260(DNA replication);GO:0006261(DNA-templa…	NA	K15254	EC:3.6.4.12	NA	DNA helicase B [Source:VGNC Symbol;Acc:VGNC:88837]	protein_coding	1.90874	2.50604	1.24441	1.71549	1.64249	1.89873	1.66882	1.41309	1.59945	2.02874	1.54471	1.89341	666	833	519	570	689	750	680	611	722	831	546	686
ENSSSCG00000000478	chr5	30697040	31020505	-	GRIP1	100514286,10499,85329	ENSSSCT00000033391;ENSSSCT00000064279	GO:0008022(protein C-terminus binding);GO:0016358(dendrite development);GO:0030159(signaling receptor complex adaptor activity);GO:0035259(nuclear glucocorticoid receptor binding);GO:0098887(neurotransmitter receptor transport, endosome to postsynaptic membrane);GO:0110165(cellular anatomical entity);GO:0110165(cellular anatomical entity)	NA	NA	NA	NA	glutamate receptor interacting protein 1 [Source:VGNC Symbol;Acc:VGNC:88690]	protein_coding	0.0867209	0.0219926	0.0477126	0.0896964	0.0583964	0.0746903	0.00539736	0.0719778	0.111827	0.0956609	0.0252707	0.259869	25	6	17	25	20	24	2	26	41	32	8	76
ENSSSCG00000000483	chr5	32640945	32673638	-	MDM1	100625194	ENSSSCT00000000521;ENSSSCT00000024910;ENSSSCT00000064183	GO:0005634(nucleus);GO:0005737(cytoplasm);GO:0005814(centriole);GO:0005856(cytoskeleton);GO:0008017(microtubule binding);GO:0046600(negative regulation of centriole replication);GO:0060041(retina development in camera-type eye);GO:0060041(retina development in camera-type eye)	NA	NA	NA	NA	Mdm1 nuclear protein [Source:VGNC Symbol;Acc:VGNC:98120]	protein_coding	2.15215	2.34346	2.13596	3.58512	2.70526	1.56199	1.8809	1.81319	2.08758	1.90485	2.49249	2.08521	316	328	375	501	478	260	324	330	397	329	371	318
ENSSSCG00000000486	chr5	32989794	33042575	+	NUP107	100516909	ENSSSCT00000070219;ENSSSCT00000081999	GO:0000776(kinetochore);GO:0000973(post-transcriptional tethering of RNA polymerase II gene DNA at nuclear periphery);GO:0005634(nucleus);GO:0005635(nuclear envelope);GO:0005643(nuclear pore);GO:0006355(regulation of DNA-templated transcription);GO:0006406(mRNA export from nucleus);GO:0006606(protein import into nucleus);GO:0008585(female gonad development);GO:0015031(protein transport);GO:001602…	03013(RNA transport);05014(Amyotrophic lateral sclerosis);05014(Amyotrophic lateral sclerosis)	NA	NA	NA	nucleoporin 107 [Source:VGNC Symbol;Acc:VGNC:90971]	protein_coding	3.66463	4.06994	2.99693	4.44721	3.79474	2.88706	3.04055	3.07363	3.00403	2.94952	2.87989	2.83533	912	965	892	1053	1135	814	884	947	968	863	726	732
ENSSSCG00000000487	chr5	33049247	33067561	+	SLC35E3	100515832	ENSSSCT00000085316	GO:0016020(membrane);GO:0016021(integral component of membrane)	NA	NA	NA	NA	solute carrier family 35 member E3 [Source:VGNC Symbol;Acc:VGNC:93079]	protein_coding	1.39821	1.22403	2.00768	1.22894	1.02738	1.13118	1.54715	1.6325	2.12197	0.920075	1.45135	1.27341	210	175	361	176	186	193	272	304	413	163	221	199
ENSSSCG00000000488	chr5	33105759	33137739	+	MDM2	100125959	ENSSSCT00000063378;ENSSSCT00000065168;ENSSSCT00000065705	GO:0000122(negative regulation of transcription by RNA polymerase II);GO:0001568(blood vessel development);GO:0001974(blood vessel remodeling);GO:0002027(regulation of heart rate);GO:0002039(p53 binding);GO:0003170(heart valve development);GO:0003181(atrioventricular valve morphogenesis);GO:0003203(endocardial cushion morphogenesis);GO:0003281(ventricular septum development);GO:0003283(atrial sep…	01522(Endocrine resistance);01524(Platinum drug resistance);04068(FoxO signaling pathway);04110(Cell cycle);04115(p53 signaling pathway);04120(Ubiquitin mediated proteolysis);04144(Endocytosis);04151(PI3K-Akt signaling pathway);04218(Cellular senescence);04625(C-type lectin receptor signaling pathway);04919(Thyroid hormone signaling pathway);05163(Human cytomegalovirus infection);05165(Human papi…	K06643	EC:2.3.2.27	NA	MDM2 proto-onco [Source:VGNC Symbol;Acc:VGNC:90093]	protein_coding	11.3538	10.5938	9.27035	10.757	10.8389	9.58629	9.35489	9.3931	8.52249	8.85755	8.98027	10.6591	2196	1952	2145	1982	2522	2101	2114	2252	2135	2013	1758	2140
ENSSSCG00000000492	chr5	33612567	33618945	+	LYZ	100157211	ENSSSCT00000098263;ENSSSCT00000000530	GO:0003796(lysozyme activity);GO:0005615(extracellular space);GO:0031640(killing of cells of another organism);GO:0042742(defense response to bacterium);GO:0042802(identical protein binding);GO:0050829(defense response to Gram-negative bacterium);GO:0050830(defense response to Gram-positive bacterium);GO:0050830(defense response to Gram-positive bacterium)	04970(Salivary secretion);04970(Salivary secretion)	K13915	EC:3.2.1.17	NA	lysozyme [Source:NCBI gene (formerly Entrezgene);Acc:100157211]	protein_coding	52.1776	11.406	9.95953	27.5605	25.4903	25.9446	4.79301	13.3199	9.85536	1.60993	4.55858	4.36001	3187	664	729	1603	1873	1796	343	1008	780	116	283	277
ENSSSCG00000000493	chr5	33785809	33849953	+	FRS2	100517823	ENSSSCT00000040112;ENSSSCT00000055620;ENSSSCT00000044494	GO:0001702(gastrulation with mouth forming second);GO:0001759(organ induction);GO:0002088(lens development in camera-type eye);GO:0003281(ventricular septum development);GO:0005068(transmembrane receptor protein tyrosine kinase adaptor activity);GO:0005104(fibroblast growth factor receptor binding);GO:0005168(neurotrophin TRKA receptor binding);GO:0005737(cytoplasm);GO:0005886(plasma membrane);GO…	04714(Thermogenesis);04722(Neurotrophin signaling pathway);05205(Proteoglycans in cancer);05205(Proteoglycans in cancer)	NA	NA	NA	fibroblast growth factor receptor substrate 2 [Source:VGNC Symbol;Acc:VGNC:88246]	protein_coding	3.00961	2.15103	2.34329	2.79078	2.39617	1.2093	1.90279	1.69013	2.0674	1.91875	2.32068	1.80901	463	315	432	409	444	211	342	323	412	347	362	289
ENSSSCG00000000496	chr5	33858572	33873523	+	CCT2	100157776	ENSSSCT00000084498;ENSSSCT00000087484	GO:0000166(nucleotide binding);GO:0002199(zona pellucida receptor complex);GO:0005085(guanyl-nucleotide exchange factor activity);GO:0005524(ATP binding);GO:0005737(cytoplasm);GO:0005829(cytosol);GO:0005832(chaperonin-containing T-complex);GO:0005874(microtubule);GO:0006457(protein folding);GO:0007339(binding of sperm to zona pellucida);GO:0016887(ATP hydrolysis activity);GO:0031625(ubiquitin pro…	NA	NA	NA	NA	chaperonin containing TCP1 subunit 2 [Source:VGNC Symbol;Acc:VGNC:86380]	protein_coding	68.1557	72.6555	59.9133	54.8345	62.3864	87.0947	78.7892	76.3932	90.399	70.7257	90.2695	73.2125	7047	7158	7411	5398	7759	10202	9518	9786	12100	8590	9449	7858
ENSSSCG00000000499	chr5	33904975	33956637	-	BEST3	100156203	ENSSSCT00000000538	GO:0005254(chloride channel activity);GO:0005886(plasma membrane);GO:0006811(ion transport);GO:0006821(chloride transport);GO:0015698(inorganic anion transport);GO:0016020(membrane);GO:0016021(integral component of membrane);GO:0034707(chloride channel complex);GO:0043271(negative regulation of ion transport);GO:1902476(chloride transmembrane transport)	NA	NA	NA	NA	bestrophin 3 [Source:VGNC Symbol;Acc:VGNC:85805]	protein_coding	0.0118843	0	0.0134016	0	0.0144694	0.0263127	0.0192404	0.0308885	0.016803	0	0	0.0337622	4	0	6	0	6	10	8	13	8	0	0	12
ENSSSCG00000000500	chr5	34003180	34053896	+	RAB3IP	100152578	ENSSSCT00000045775;ENSSSCT00000000539;ENSSSCT00000043485;ENSSSCT00000040564	GO:0005085(guanyl-nucleotide exchange factor activity);GO:0005634(nucleus);GO:0005829(cytosol);GO:0006612(protein targeting to membrane);GO:0006887(exocytosis);GO:0050790(regulation of catalytic activity);GO:0070319(Golgi to plasma membrane transport vesicle);GO:0070319(Golgi to plasma membrane transport vesicle)	NA	NA	NA	NA	RAB3A interacting protein [Source:HGNC Symbol;Acc:HGNC:16508]	protein_coding	0.771839	0.677131	0.565253	1.67804	1.51559	1.08105	0.797904	0.675491	0.811003	1.10373	0.61646	0.514013	222	186	195	459	523	353	269	241	302	373	179	155
ENSSSCG00000000502	chr5	34426763	34549310	+	CNOT2	100153354	ENSSSCT00000046336;ENSSSCT00000061741;ENSSSCT00000064126	GO:0000122(negative regulation of transcription by RNA polymerase II);GO:0001222(transcription corepressor binding);GO:0001829(trophectodermal cell differentiation);GO:0004535(poly(A)-specific ribonuclease activity);GO:0005654(nucleoplasm);GO:0005737(cytoplasm);GO:0005829(cytosol);GO:0005886(plasma membrane);GO:0006355(regulation of DNA-templated transcription);GO:0010606(positive regulation of c…	03018(RNA degradation);03018(RNA degradation)	NA	NA	NA	CCR4-NOT transcription complex subunit 2 [Source:VGNC Symbol;Acc:VGNC:86834]	protein_coding	15.8494	14.2241	15.2755	21.4469	18.5472	13.0586	14.9849	15.7885	13.389	15.0324	12.836	14.1574	2538	2170	2925	3268	3570	2369	2802	3131	2775	2826	2081	2353
ENSSSCG00000000504	chr5	34659964	34794289	-	PTPRB	100156181	ENSSSCT00000000543;ENSSSCT00000044060;ENSSSCT00000055823	GO:0001525(angiogenesis);GO:0004721(phosphoprotein phosphatase activity);GO:0004725(protein tyrosine phosphatase activity);GO:0006470(protein dephosphorylation);GO:0016020(membrane);GO:0016021(integral component of membrane);GO:0016311(dephosphorylation);GO:0016787(hydrolase activity);GO:0016791(phosphatase activity);GO:0030246(carbohydrate binding);GO:0043235(receptor complex);GO:0045296(cadheri…	04520(Adherens junction);04520(Adherens junction)	K05694	EC:3.1.3.48	NA	protein tyrosine phosphatase receptor type B [Source:VGNC Symbol;Acc:VGNC:91984]	protein_coding	12.2024	12.5722	8.08935	14.2872	16.1385	19.4423	16.6845	12.6395	9.68214	12.6957	13.7893	10.035	5203	5108	4127	5801	8277	9391	8311	6677	5345	6359	5952	4441
ENSSSCG00000000509	chr5	35617266	35671149	-	ZFC3H1	100620115	ENSSSCT00000039112	GO:0000178(exosome (RNase complex));GO:0005634(nucleus);GO:0006396(RNA processing)	NA	NA	NA	NA	zinc finger C3H1-type containing [Source:VGNC Symbol;Acc:VGNC:95139]	protein_coding	13.011	14.4314	13.977	9.29621	9.66701	11.2855	7.19025	8.77226	10.7493	11.3592	11.251	12.9606	4274	4518	5493	2908	3820	4201	2760	3571	4572	4384	3742	4420
ENSSSCG00000000510	chr5	35692309	35719346	+	TMEM19	100519775	ENSSSCT00000044613	GO:0016020(membrane);GO:0016021(integral component of membrane)	NA	NA	NA	NA	transmembrane protein 19 [Source:VGNC Symbol;Acc:VGNC:94124]	protein_coding	7.67306	8.65432	8.56452	5.01539	6.49866	9.74344	8.69297	9.36146	8.82269	6.65768	10.4069	9.22965	1584	1703	2115	986	1614	2279	2097	2394	2358	1615	2175	1978
ENSSSCG00000000512	chr5	35827473	35908385	+	TBC1D15	100157246	ENSSSCT00000000551;ENSSSCT00000076863;ENSSSCT00000042002;ENSSSCT00000069415	GO:0005096(GTPase activator activity);GO:0005576(extracellular region);GO:0005737(cytoplasm);GO:0043087(regulation of GTPase activity);GO:0090630(activation of GTPase activity);GO:0090630(activation of GTPase activity)	04137(Mitophagy - animal);04137(Mitophagy - animal)	NA	NA	NA	TBC1 domain family member 15 [Source:VGNC Symbol;Acc:VGNC:93764]	protein_coding	7.15215	7.19027	7.02296	7.45798	7.66419	7.57273	5.14352	6.25857	5.26027	5.9092	5.90668	6.93928	2062	1975	2422	2047	2657	2472	1732	2235	1963	2002	1724	2077
ENSSSCG00000000515	chr5	36274165	36658701	+	TRHDE	100620702	ENSSSCT00000051182	GO:0004177(aminopeptidase activity);GO:0005737(cytoplasm);GO:0005886(plasma membrane);GO:0006508(proteolysis);GO:0007165(signal transduction);GO:0008217(regulation of blood pressure);GO:0008233(peptidase activity);GO:0008237(metallopeptidase activity);GO:0008270(zinc ion binding);GO:0016020(membrane);GO:0016021(integral component of membrane);GO:0016787(hydrolase activity);GO:0042277(peptide bind…	NA	K01306	EC:3.4.19.6	NA	thyrotropin releasing hormone degrading enzyme [Source:VGNC Symbol;Acc:VGNC:94390]	protein_coding	0.037579	0	0.013612	0.361533	0.166277	0.114737	0	0.020402	0.032818	0.082312	0	0	11	0	5	95	55	36	0	7	12	27	0	0
ENSSSCG00000000516	chr5	38326414	38533110	-	KCNC2	100153996	ENSSSCT00000042765;ENSSSCT00000054960	GO:0001508(action potential);GO:0005216(ion channel activity);GO:0005244(voltage-gated ion channel activity);GO:0005249(voltage-gated potassium channel activity);GO:0005251(delayed rectifier potassium channel activity);GO:0005267(potassium channel activity);GO:0006811(ion transport);GO:0006813(potassium ion transport);GO:0008076(voltage-gated potassium channel complex);GO:0016020(membrane);GO:001…	NA	NA	NA	NA	potassium voltage-gated channel subfamily C member 2 [Source:VGNC Symbol;Acc:VGNC:89333]	protein_coding	0	0	0.036958	0.0134349	0	0	0	0	0	0	0	0	0	0	14	4	0	0	0	0	0	0	0	0
ENSSSCG00000000517	chr5	38577316	38625070	-	CAPS2	100737216,93664	ENSSSCT00000046298;ENSSSCT00000000559	GO:0005509(calcium ion binding);GO:0046872(metal ion binding);GO:0046872(metal ion binding)	NA	NA	NA	NA	calcyphosine 2 [Source:VGNC Symbol;Acc:VGNC:86181]	protein_coding	0.239806	0.0944288	0.148242	0.210848	0.113788	0.10868	0.206937	0.110461	0.0898172	0.0904844	0.10837	0.221954	91	34	67	76	52	47	92	52	44	41	42	88
ENSSSCG00000000519	chr5	38766998	38815597	+	GLIPR1	100523551	ENSSSCT00000041475	GO:0005576(extracellular region);GO:0016020(membrane);GO:0016021(integral component of membrane)	NA	NA	NA	NA	GLI pathosis related 1 [Source:VGNC Symbol;Acc:VGNC:98020]	protein_coding	5.13184	8.35613	7.59984	10.5367	9.04464	7.81581	5.74354	5.91725	7.28504	6.82631	10.3986	7.67547	1572	2438	2784	3072	3331	2711	2055	2245	2888	2455	3224	2440
ENSSSCG00000000522	chr5	39328052	39363711	-	NAP1L1	100524086	ENSSSCT00000105798;ENSSSCT00000000564;ENSSSCT00000048014;ENSSSCT00000074706;ENSSSCT00000052687;ENSSSCT00000097227;ENSSSCT00000048385	GO:0000785(chromatin);GO:0003682(chromatin binding);GO:0005634(nucleus);GO:0005737(cytoplasm);GO:0006334(nucleosome assembly);GO:0042393(histone binding);GO:0050769(positive regulation of neurogenesis);GO:2000179(positive regulation of neural precursor cell proliferation);GO:2000179(positive regulation of neural precursor cell proliferation)	NA	NA	NA	NA	nucleosome assembly protein 1 like 1 [Source:VGNC Symbol;Acc:VGNC:90576]	protein_coding	31.8172	31.0556	26.8963	38.43	36.6236	29.8959	26.8831	21.5308	25.926	34.6529	23.5661	31.8369	13430	12492	13583	15445	18593	14297	13258	11260	14168	17182	10071	13950
ENSSSCG00000000523	chr5	39557715	39566323	-	BBS10	100737698	ENSSSCT00000000565	GO:0005524(ATP binding);GO:0005832(chaperonin-containing T-complex);GO:0043254(regulation of protein-containing complex assembly);GO:0045494(photoreceptor cell maintenance);GO:0051131(chaperone-mediated protein complex assembly);GO:0061629(RNA polymerase II-specific DNA-binding transcription factor binding);GO:1905515(non-motile cilium assembly)	NA	NA	NA	NA	Bardet-Biedl syndrome 10 [Source:HGNC Symbol;Acc:HGNC:26291]	protein_coding	1.03561	1.22463	0.711897	0.988718	1.19474	1.20973	0.779767	0.691087	0.710772	1.01889	1.00314	0.890423	287	323	236	261	398	380	253	237	255	332	282	256
ENSSSCG00000000527	chr5	40872283	40934326	+	SYT10	100158038	ENSSSCT00000000569	GO:0000149(SNARE binding);GO:0001786(phosphatidylserine binding);GO:0005509(calcium ion binding);GO:0005544(calcium-dependent phospholipid binding);GO:0005886(plasma membrane);GO:0014059(regulation of dopamine secretion);GO:0016020(membrane);GO:0016021(integral component of membrane);GO:0016192(vesicle-mediated transport);GO:0017156(calcium-ion regulated exocytosis);GO:0017158(regulation of calci…	NA	NA	NA	NA	synaptotagmin 10 [Source:VGNC Symbol;Acc:VGNC:93679]	protein_coding	0.03134	0	0	0	0	0	0	0.070116	0	0	0	0	3	0	0	0	0	0	0	8	0	0	0	0
ENSSSCG00000000528	chr5	41424845	41508868	+	PKP2	100526169	ENSSSCT00000000570	GO:0002159(desmosome assembly);GO:0002934(desmosome organization);GO:0005080(protein kinase C binding);GO:0005634(nucleus);GO:0005654(nucleoplasm);GO:0005737(cytoplasm);GO:0005882(intermediate filament);GO:0005886(plasma membrane);GO:0005912(adherens junction);GO:0007043(cell-cell junction assembly);GO:0007155(cell adhesion);GO:0007507(heart development);GO:0014704(intercalated disc);GO:0019215(i…	05412(Arrhythmogenic right ventricular cardiomyopathy)	NA	NA	NA	plakophilin 2 [Source:VGNC Symbol;Acc:VGNC:91486]	protein_coding	0.060288	0.0421767	0.452115	0.0808192	0.0639777	0.107783	0.0426693	0	0	0.0625865	0.0886639	0.0399977	12	8	103	15	15	24	10	0	0	14	18	8
ENSSSCG00000000530	chr5	41680452	41879062	-	FGD4	100623278	ENSSSCT00000033918;ENSSSCT00000036458;ENSSSCT00000035951;ENSSSCT00000039923	GO:0005085(guanyl-nucleotide exchange factor activity);GO:0005737(cytoplasm);GO:0005856(cytoskeleton);GO:0007010(cytoskeleton organization);GO:0046847(filopodium assembly);GO:0046872(metal ion binding);GO:0050790(regulation of catalytic activity);GO:0050790(regulation of catalytic activity)	NA	NA	NA	NA	FYVE, RhoGEF and PH domain containing 4 [Source:VGNC Symbol;Acc:VGNC:88097]	protein_coding	1.28379	1.16849	0.690701	1.38936	1.08766	1.37385	1.13181	1.04006	0.961471	0.900528	0.870065	1.02629	321	279	206	331	327	389	330	323	311	264	220	267
ENSSSCG00000000531	chr5	41897382	42143620	-	BICD1	100511132	ENSSSCT00000045345;ENSSSCT00000067729;ENSSSCT00000023961	GO:0005794(Golgi apparatus);GO:0005802(trans-Golgi network);GO:0005813(centrosome);GO:0005829(cytosol);GO:0005881(cytoplasmic microtubule);GO:0008093(cytoskeletal anchor activity);GO:0016020(membrane);GO:0016032(viral process);GO:0019901(protein kinase binding);GO:0031267(small GTPase binding);GO:0031410(cytoplasmic vesicle);GO:0033365(protein localization to organelle);GO:0034452(dynactin bindin…	NA	NA	NA	NA	BICD cargo adaptor 1 [Source:VGNC Symbol;Acc:VGNC:85818]	protein_coding	1.23006	0.653747	0.722827	1.02301	0.907244	0.399131	0.627829	0.975252	0.355154	0.884815	0.729227	1.15258	640	324	449	506	568	235	381	629	240	541	384	622
ENSSSCG00000000534	chr5	43099749	43182803	+	IPO8	100511694	ENSSSCT00000081658;ENSSSCT00000000576;ENSSSCT00000042238;ENSSSCT00000046018	GO:0005635(nuclear envelope);GO:0005737(cytoplasm);GO:0005829(cytosol);GO:0006606(protein import into nucleus);GO:0006886(intracellular protein transport);GO:0031267(small GTPase binding);GO:0031267(small GTPase binding)	NA	NA	NA	NA	importin 8 [Source:VGNC Symbol;Acc:VGNC:89181]	protein_coding	7.66423	6.38766	6.82534	6.58097	6.12381	7.81211	7.79232	8.341	6.88926	6.66292	7.20707	6.17109	1963	1559	2092	1605	1888	2267	2332	2649	2285	2005	1869	1641
ENSSSCG00000000536	chr5	44334230	44387933	+	ERGIC2	100512051	ENSSSCT00000077439;ENSSSCT00000084856;ENSSSCT00000078224;ENSSSCT00000000578;ENSSSCT00000090906;ENSSSCT00000066643	GO:0005634(nucleus);GO:0005730(nucleolus);GO:0005737(cytoplasm);GO:0005778(peroxisomal membrane);GO:0005783(endoplasmic reticulum);GO:0005794(Golgi apparatus);GO:0006629(lipid metabolic process);GO:0006888(endoplasmic reticulum to Golgi vesicle-mediated transport);GO:0006890(retrograde vesicle-mediated transport, Golgi to endoplasmic reticulum);GO:0016020(membrane);GO:0016021(integral component o…	NA	NA	NA	NA	ERGIC and golgi 2 [Source:VGNC Symbol;Acc:VGNC:87771]	protein_coding	6.90638	8.04927	6.52442	7.61335	6.87932	7.53716	7.25113	6.6538	6.86662	6.42351	8.56766	8.17767	2701	2998	3051	2835	3237	3339	3312	3224	3475	2950	3392	3319
ENSSSCG00000000540	chr5	44227573	44288602	+	ENSSSCG00000000540		ENSSSCT00000000582	GO:0004252(serine-type endopeptidase activity);GO:0006508(proteolysis);GO:0008233(peptidase activity);GO:0008236(serine-type peptidase activity);GO:0016787(hydrolase activity)	NA	NA	NA	NA	ovochymase 1 [Source:VGNC Symbol;Acc:VGNC:91109]	protein_coding	0.154995	0	0	0	0.030506	0.041705	0	0.027379	0	0.017312	0.042653	0	24	0	0	0	6	8	0	6	0	4	7	0
ENSSSCG00000000541	chr5	44381129	44559374	-	FAR2	100512348	ENSSSCT00000049881;ENSSSCT00000097470	GO:0005777(peroxisome);GO:0005778(peroxisomal membrane);GO:0005779(integral component of peroxisomal membrane);GO:0006629(lipid metabolic process);GO:0016020(membrane);GO:0016021(integral component of membrane);GO:0016491(oxidoreductase activity);GO:0016620(oxidoreductase activity, acting on the aldehyde or oxo group of donors, NAD or NADP as acceptor);GO:0035336(long-chain fatty-acyl-CoA metabol…	04146(Peroxisome);04146(Peroxisome)	K13356	EC:1.2.1.84	NA	fatty acyl-CoA reductase 2 [Source:VGNC Symbol;Acc:VGNC:88011]	protein_coding	0.907967	0.341509	0.784389	0.340599	0.373336	0.370841	0.433909	0.856226	1.02308	0.539183	0.901283	0.8291	295	106	305	106	146	137	165	345	430	206	297	280
ENSSSCG00000000545	chr5	45933928	45954881	-	KLHL42	100513858	ENSSSCT00000000588	GO:0000209(protein polyubiquitination);GO:0004842(ubiquitin-protein transferase activity);GO:0031463(Cul3-RING ubiquitin ligase complex);GO:0032886(regulation of microtubule-based process);GO:0043161(proteasome-mediated ubiquitin-dependent protein catabolic process)	NA	NA	NA	NA	kelch like family member 42 [Source:VGNC Symbol;Acc:VGNC:89534]	protein_coding	2.08125	1.16551	1.2503	1.69298	1.8082	1.4084	1.7609	2.13147	1.72877	1.38092	2.20758	1.79406	324	173	233	251	339	249	320	411	348	253	348	290
ENSSSCG00000000547	chr5	45973693	46030453	-	MRPS35	100514049,28957	ENSSSCT00000000590;ENSSSCT00000045802	GO:0001881(receptor recycling);GO:0003735(structural constituent of ribosome);GO:0005739(mitochondrion);GO:0005763(mitochondrial small ribosomal subunit);GO:0005840(ribosome);GO:0032543(mitochondrial translation);GO:0032543(mitochondrial translation)	NA	NA	NA	NA	mitochondrial ribosomal protein S35 [Source:VGNC Symbol;Acc:VGNC:103303]	protein_coding	8.20092	8.90548	6.85464	6.97788	5.72268	6.99982	7.96356	11.0643	9.80786	6.67816	10.187	7.70776	1143	1182	1142	925	959	1104	1296	1908	1768	1093	1436	1114
ENSSSCG00000000549	chr5	46031401	46222839	-	PPFIBP1	100516194	ENSSSCT00000103469;ENSSSCT00000031448;ENSSSCT00000098813;ENSSSCT00000000592;ENSSSCT00000104468;ENSSSCT00000099978;ENSSSCT00000106666	GO:0005886(plasma membrane);GO:0007528(neuromuscular junction development);GO:0048786(presynaptic active zone);GO:0050808(synapse organization);GO:0050808(synapse organization)	NA	NA	NA	NA	PPFIA binding protein 1 [Source:VGNC Symbol;Acc:VGNC:91695]	protein_coding	9.9028	10.6284	7.84355	13.0198	12.4659	12.6709	8.50331	7.8698	8.05968	12.1653	7.13728	8.56298	3641	3724	3450	4557	5513	5280	3654	3585	3837	5254	2657	3268
ENSSSCG00000000551	chr5	46290001	46482461	-	ARNTL2	100625791	ENSSSCT00000000594;ENSSSCT00000056737	GO:0000978(RNA polymerase II cis-regulatory region sequence-specific DNA binding);GO:0000981(DNA-binding transcription factor activity, RNA polymerase II-specific);GO:0003677(DNA binding);GO:0003700(DNA-binding transcription factor activity);GO:0005634(nucleus);GO:0005654(nucleoplasm);GO:0005667(transcription regulator complex);GO:0005730(nucleolus);GO:0005737(cytoplasm);GO:0006355(regulation of …	NA	NA	NA	bHLH	aryl hydrocarbon receptor nuclear translocator like 2 [Source:VGNC Symbol;Acc:VGNC:103217]	protein_coding	14.7845	15.683	19.3017	14.8183	13.664	11.0379	13.8999	16.1488	14.2991	17.2775	17.8624	17.454	5285	5342	8254	5043	5875	4471	5805	7152	6617	7255	6464	6477
ENSSSCG00000000553	chr5	46740949	46784194	+	TM7SF3	100156281	ENSSSCT00000000596	GO:0005886(plasma membrane);GO:0016020(membrane);GO:0016021(integral component of membrane);GO:0032024(positive regulation of insulin secretion);GO:0034620(cellular response to unfolded protein);GO:0043069(negative regulation of programmed cell death)	NA	NA	NA	NA	transmembrane 7 superfamily member 3 [Source:VGNC Symbol;Acc:VGNC:94035]	protein_coding	5.86624	4.89962	4.48013	5.91678	5.36399	4.40241	5.64022	6.37986	6.12997	6.6209	4.61272	5.13368	1171	932	1070	1125	1288	996	1315	1578	1584	1552	932	1064
ENSSSCG00000000554	chr5	46794110	46824153	-	FGFR1OP2	100157490	ENSSSCT00000000597;ENSSSCT00000032540	GO:0009611(response to wounding);GO:0042060(wound healing);GO:0042802(identical protein binding);GO:0042802(identical protein binding)	NA	NA	NA	NA	FGFR1 onco partner 2 [Source:VGNC Symbol;Acc:VGNC:88119]	protein_coding	6.36265	6.85612	5.45125	8.74085	7.22316	4.87707	5.46433	5.92404	5.98268	6.03931	5.55629	5.70504	976	1002	1000	1276	1332	847	979	1125	1188	1087	862	908
ENSSSCG00000000555	chr5	46935932	47464125	+	ITPR2	100517279	ENSSSCT00000074425;ENSSSCT00000023164	GO:0001666(response to hypoxia);GO:0005216(ion channel activity);GO:0005220(inositol 1,4,5-trisphosphate-sensitive calcium-release channel activity);GO:0005262(calcium channel activity);GO:0005654(nucleoplasm);GO:0005737(cytoplasm);GO:0005783(endoplasmic reticulum);GO:0005789(endoplasmic reticulum membrane);GO:0005886(plasma membrane);GO:0005938(cell cortex);GO:0006811(ion transport);GO:0006816(c…	04020(Calcium signaling pathway);04022(cGMP-PKG signaling pathway);04070(Phosphatidylinositol signaling system);04114(Oocyte meiosis);04210(Apoptosis);04218(Cellular senescence);04270(Vascular smooth muscle contraction);04371(Apelin signaling pathway);04540(Gap junction);04611(Platelet activation);04621(NOD-like receptor signaling pathway);04625(C-type lectin receptor signaling pathway);04720(Lon…	NA	NA	NA	inositol 1,4,5-trisphosphate receptor type 2 [Source:VGNC Symbol;Acc:VGNC:103294]	protein_coding	5.33533	5.29763	4.29619	5.25543	5.676	7.41889	6.4637	4.53842	3.97783	4.21704	4.04106	4.95819	2457	2324	2366	2305	3144	3870	3477	2589	2372	2282	1884	2370
ENSSSCG00000000559	chr5	47729751	47847452	-	RASSF8	100151839	ENSSSCT00000038738	GO:0007165(signal transduction)	NA	NA	NA	NA	Ras association domain family member 8 [Source:VGNC Symbol;Acc:VGNC:92128]	protein_coding	3.76325	3.18431	3.88196	5.43756	5.06865	4.1602	4.17652	4.33023	4.66936	3.43111	3.31682	4.46161	1002	808	1236	1378	1622	1254	1299	1428	1609	1073	894	1233
ENSSSCG00000000563	chr5	48649077	48766390	-	ENSSSCG00000000563		ENSSSCT00000061807	GO:0005737(cytoplasm);GO:0016020(membrane);GO:0016021(integral component of membrane)	NA	NA	NA	NA		protein_coding	1.57311	0.902393	0.883876	0.932109	1.12604	0.742217	0.679675	0.625972	0.891658	1.29118	0.235901	0.855092	347	190	234	196	299	186	176	172	255	335	53	196
ENSSSCG00000000567	chr5	49504551	50161558	+	SOX5	100627965	ENSSSCT00000072220;ENSSSCT00000087945;ENSSSCT00000000610;ENSSSCT00000000609;ENSSSCT00000071491	GO:0000976(transcription cis-regulatory region binding);GO:0000978(RNA polymerase II cis-regulatory region sequence-specific DNA binding);GO:0000981(DNA-binding transcription factor activity, RNA polymerase II-specific);GO:0003677(DNA binding);GO:0005634(nucleus);GO:0006357(regulation of transcription by RNA polymerase II);GO:0032332(positive regulation of chondrocyte differentiation);GO:0045165(…	NA	NA	NA	HMG	SRY-box transcription factor 5 [Source:VGNC Symbol;Acc:VGNC:93357]	protein_coding	1.32516	0.796916	0.474381	1.00218	0.838489	0.502723	1.14504	0.541489	0.632303	0.620125	0.554949	0.820814	227	131	98	164	174	98	229	117	140	126	97	147
ENSSSCG00000000570	chr5	51040519	51132288	+	C2CD5	100521725	ENSSSCT00000058783;ENSSSCT00000061175;ENSSSCT00000064561;ENSSSCT00000000613	GO:0005509(calcium ion binding);GO:0005544(calcium-dependent phospholipid binding);GO:0005829(cytosol);GO:0005886(plasma membrane);GO:0005938(cell cortex);GO:0030659(cytoplasmic vesicle membrane);GO:0031340(positive regulation of vesicle fusion);GO:0032587(ruffle membrane);GO:0032869(cellular response to insulin stimulus);GO:0034451(centriolar satellite);GO:0065002(intracellular protein transmemb…	NA	NA	NA	NA	C2 calcium dependent domain containing 5 [Source:VGNC Symbol;Acc:VGNC:85995]	protein_coding	8.67995	10.5232	9.51624	13.3031	12.705	7.57597	6.71189	7.95633	8.1229	8.83982	8.21057	9.93099	1995	2305	2617	2912	3512	1972	1803	2266	2417	2387	1911	2370
ENSSSCG00000000571	chr5	51537777	51691595	+	ABCC9	100127449	ENSSSCT00000056800;ENSSSCT00000000614;ENSSSCT00000059132;ENSSSCT00000087424	GO:0000166(nucleotide binding);GO:0005267(potassium channel activity);GO:0005524(ATP binding);GO:0005886(plasma membrane);GO:0006813(potassium ion transport);GO:0008281(sulfonylurea receptor activity);GO:0008282(inward rectifying potassium channel);GO:0016020(membrane);GO:0016021(integral component of membrane);GO:0030017(sarcomere);GO:0033198(response to ATP);GO:0042626(ATPase-coupled transmembr…	02010(ABC transporters);02010(ABC transporters)	NA	NA	NA	ATP binding cassette subfamily C member 9 [Source:VGNC Symbol;Acc:VGNC:84960]	protein_coding	2.39982	1.51579	2.00966	1.79119	2.09976	2.70409	2.8164	2.11599	1.97014	1.75106	1.30652	1.12297	1067	643	1069	760	1122	1362	1462	1166	1134	915	589	518
ENSSSCG00000000573	chr5	51696188	51703813	+	KCNJ8	100152631	ENSSSCT00000046832	GO:0005242(inward rectifier potassium channel activity);GO:0005244(voltage-gated ion channel activity);GO:0006811(ion transport);GO:0006813(potassium ion transport);GO:0007507(heart development);GO:0015272(ATP-activated inward rectifier potassium channel activity);GO:0016020(membrane);GO:0016021(integral component of membrane);GO:0030016(myofibril);GO:0032496(response to lipopolysaccharide);GO:00…	04022(cGMP-PKG signaling pathway)	NA	NA	NA	potassium inwardly rectifying channel subfamily J member 8 [Source:VGNC Symbol;Acc:VGNC:89361]	protein_coding	13.8001	10.0911	7.60406	15.2077	14.6534	15.5367	24.1671	16.1224	16.485	16.7487	8.28035	8.71054	1090	760	719	1144	1392	1390	2230	1577	1685	1554	662	714
ENSSSCG00000000576	chr5	51810943	51831216	+	ENSSSCG00000000576		ENSSSCT00000000620	GO:0003824(catalytic activity);GO:0004459(L-lactate dehydrogenase activity);GO:0005737(cytoplasm);GO:0005739(mitochondrion);GO:0005743(mitochondrial inner membrane);GO:0016020(membrane);GO:0016491(oxidoreductase activity);GO:0016616(oxidoreductase activity, acting on the CH-OH group of donors, NAD or NADP as acceptor);GO:0019752(carboxylic acid metabolic process)	00010(Glycolysis / Gluconeogenesis);00270(Cysteine and methionine metabolism);00620(Pyruvate metabolism);00640(Propanoate metabolism);01100(Metabolic pathways);04066(HIF-1 signaling pathway);04922(Glucagon signaling pathway);05230(Central carbon metabolism in cancer)	K00016	EC:1.1.1.27	NA		protein_coding	1073.07	1373.32	1140.59	1523.27	1457.89	1304.45	1300.25	1298.92	1799.24	1791.1	1245.3	1385.57	69373	84605	88219	93767	113365	95546	98214	104047	150595	136023	81508	92990
ENSSSCG00000000577	chr5	51862863	51917757	+	GYS2	100157080	ENSSSCT00000000621;ENSSSCT00000036982	GO:0004373(glycogen (starch) synthase activity);GO:0005737(cytoplasm);GO:0005829(cytosol);GO:0005978(glycogen biosynthetic process);GO:0016740(transferase activity);GO:0016757(glycosyltransferase activity);GO:0016757(glycosyltransferase activity)	00500(Starch and sucrose metabolism);01100(Metabolic pathways);04151(PI3K-Akt signaling pathway);04152(AMPK signaling pathway);04910(Insulin signaling pathway);04922(Glucagon signaling pathway);04931(Insulin resistance);04931(Insulin resistance)	K00693	EC:2.4.1.11	NA	glycogen synthase 2 [Source:VGNC Symbol;Acc:VGNC:88761]	protein_coding	14.0665	24.3545	2.35464	23.115	20.7278	15.7738	33.5371	20.0916	24.7958	33.0609	31.6222	7.3575	3443	5680	690	5387	6102	4375	9591	6093	7857	9506	7836	1870
ENSSSCG00000000579	chr5	51939485	51953315	-	GOLT1B	100154676	ENSSSCT00000069758;ENSSSCT00000000623;ENSSSCT00000102825;ENSSSCT00000105841	GO:0000139(Golgi membrane);GO:0005737(cytoplasm);GO:0005783(endoplasmic reticulum);GO:0005829(cytosol);GO:0006888(endoplasmic reticulum to Golgi vesicle-mediated transport);GO:0016020(membrane);GO:0016021(integral component of membrane);GO:0016192(vesicle-mediated transport);GO:0032991(protein-containing complex);GO:0042147(retrograde transport, endosome to Golgi);GO:0042147(retrograde transport,…	NA	NA	NA	NA	golgi transport 1B [Source:VGNC Symbol;Acc:VGNC:88557]	protein_coding	6.40378	5.20321	6.97173	5.95198	6.69578	6.09657	6.80721	9.39197	7.75705	5.48029	8.45401	6.11012	1645	1274	2143	1456	2069	1774	2043	2989	2580	1654	2199	1630
ENSSSCG00000000580	chr5	51953451	52003740	+	RECQL	100621847	ENSSSCT00000059872	GO:0000166(nucleotide binding);GO:0003676(nucleic acid binding);GO:0003678(DNA helicase activity);GO:0004386(helicase activity);GO:0005524(ATP binding);GO:0005634(nucleus);GO:0005654(nucleoplasm);GO:0006310(DNA recombination);GO:0016043(cellular component organization);GO:0016787(hydrolase activity);GO:0016887(ATP hydrolysis activity);GO:0032508(DNA duplex unwinding);GO:0043138(3'-5' DNA helicase…	NA	K10899	EC:3.6.4.12	NA	RecQ like helicase [Source:VGNC Symbol;Acc:VGNC:92195]	protein_coding	3.14101	3.0898	3.76455	4.62604	4.4017	3.81489	3.12001	3.4107	2.79984	2.71776	3.46656	2.88146	963	903	1380	1350	1623	1325	1117	1295	1111	979	1076	917
ENSSSCG00000000582	chr5	52046006	52050525	-	ENSSSCG00000000582		ENSSSCT00000059687	GO:0005179(hormone activity);GO:0005576(extracellular region);GO:0007165(signal transduction)	04080(Neuroactive ligand-receptor interaction);04950(Maturity onset diabetes of the young)	NA	NA	NA	islet amyloid polypeptide [Source:VGNC Symbol;Acc:VGNC:89015]	protein_coding	0	0	0	0	0	0	0	0	0	0	0.103817	0	0	0	0	0	0	0	0	0	0	0	7	0
ENSSSCG00000000583	chr5	51993717	52020809	-	PYROXD1	100521012	ENSSSCT00000000627	GO:0005634(nucleus);GO:0005737(cytoplasm);GO:0016491(oxidoreductase activity);GO:0030017(sarcomere);GO:0034599(cellular response to oxidative stress);GO:0050660(flavin adenine dinucleotide binding)	NA	NA	NA	NA	pyridine nucleotide-disulphide oxidoreductase domain 1 [Source:VGNC Symbol;Acc:VGNC:92022]	protein_coding	4.21224	7.29661	4.91469	7.86427	7.46576	5.40925	5.70741	5.91073	5.21444	4.74613	4.94085	6.13255	723	1193	1009	1285	1541	1052	1144	1257	1158	957	858	1092
ENSSSCG00000000584	chr5	52049443	52129730	+	SLCO1A2	397534	ENSSSCT00000042165	GO:0005886(plasma membrane);GO:0006811(ion transport);GO:0016020(membrane);GO:0016021(integral component of membrane);GO:0022857(transmembrane transporter activity);GO:0055085(transmembrane transport)	04976(Bile secretion)	NA	NA	NA	solute carrier organic anion transporter family member 1A2 [Source:VGNC Symbol;Acc:VGNC:93193]	protein_coding	0.0472929	0.0194434	1.11603	0.0916463	0.189551	0	0.142348	0.0424408	0.0415709	0	1.70288	0	8	3	202	14	35	0	26	8	9	0	261	0
ENSSSCG00000000585	chr5	52234398	52315026	-	SLCO1C1	100522616	ENSSSCT00000000630	GO:0005886(plasma membrane);GO:0005887(integral component of plasma membrane);GO:0006811(ion transport);GO:0008514(organic anion transmembrane transporter activity);GO:0015125(bile acid transmembrane transporter activity);GO:0015347(sodium-independent organic anion transmembrane transporter activity);GO:0015349(thyroid hormone transmembrane transporter activity);GO:0015711(organic anion transport…	04919(Thyroid hormone signaling pathway)	NA	NA	NA	solute carrier organic anion transporter family member 1C1 [Source:VGNC Symbol;Acc:VGNC:93194]	protein_coding	0.039186	0	0	0	0	0	0.045917	0	0	0	0	0	6	0	0	0	0	0	8	0	0	0	0	0
ENSSSCG00000000587	chr5	53617358	53691042	-	AEBP2	100522805	ENSSSCT00000089424;ENSSSCT00000000632;ENSSSCT00000037031	GO:0000122(negative regulation of transcription by RNA polymerase II);GO:0003712(transcription coregulator activity);GO:0005634(nucleus);GO:0005654(nucleoplasm);GO:0006355(regulation of DNA-templated transcription);GO:0006357(regulation of transcription by RNA polymerase II);GO:0035098(ESC/E(Z) complex);GO:0035098(ESC/E(Z) complex)	NA	NA	NA	zf-C2H2	AE binding protein 2 [Source:VGNC Symbol;Acc:VGNC:85163]	protein_coding	9.26038	9.94913	6.16525	10.7292	9.82866	6.02576	9.48821	9.04966	8.33126	9.28558	7.18793	8.6076	2127	2178	1694	2347	2714	1568	2546	2575	2476	2505	1672	2053
ENSSSCG00000000588	chr5	53760824	54016886	-	PLEKHA5	100523186	ENSSSCT00000068430;ENSSSCT00000037877;ENSSSCT00000041180;ENSSSCT00000059158;ENSSSCT00000089279;ENSSSCT00000000633;ENSSSCT00000060287;ENSSSCT00000055577	GO:0005654(nucleoplasm);GO:0005829(cytosol);GO:0010314(phosphatidylinositol-5-phosphate binding);GO:0014069(postsynaptic density);GO:0032266(phosphatidylinositol-3-phosphate binding);GO:0061458(reproductive system development);GO:0070273(phosphatidylinositol-4-phosphate binding);GO:0080025(phosphatidylinositol-3,5-bisphosphate binding);GO:0098978(glutamatergic synapse);GO:0098978(glutamatergic sy…	NA	NA	NA	NA	pleckstrin homology domain containing A5 [Source:VGNC Symbol;Acc:VGNC:91535]	protein_coding	3.47095	6.28187	5.26767	7.37695	5.55886	3.48502	3.05894	2.7266	3.10803	3.53024	3.96089	4.57928	957	1650	1740	1935	1843	1090	986	932	1109	1146	1106	1311
ENSSSCG00000000590	chr5	54408296	54452417	+	PLCZ1	397632	ENSSSCT00000000635	GO:0004435(phosphatidylinositol phospholipase C activity);GO:0004629(phospholipase C activity);GO:0005546(phosphatidylinositol-4,5-bisphosphate binding);GO:0005634(nucleus);GO:0005654(nucleoplasm);GO:0005730(nucleolus);GO:0005829(cytosol);GO:0006629(lipid metabolic process);GO:0006816(calcium ion transport);GO:0007165(signal transduction);GO:0007204(positive regulation of cytosolic calcium ion co…	00562(Inositol phosphate metabolism);01100(Metabolic pathways);04020(Calcium signaling pathway);04070(Phosphatidylinositol signaling system);04114(Oocyte meiosis);04919(Thyroid hormone signaling pathway)	K05861	EC:3.1.4.11	NA	phospholipase C zeta 1 [Source:VGNC Symbol;Acc:VGNC:103310]	protein_coding	0	0	0	0.116612	0	0.084611	0	0.019421	0	0.008684	0	0	0	0	0	12	0	10	0	3	0	2	0	0
ENSSSCG00000000591	chr5	54474629	54849512	-	PIK3C2G	100523844	ENSSSCT00000098322;ENSSSCT00000000636;ENSSSCT00000031285	GO:0005737(cytoplasm);GO:0005886(plasma membrane);GO:0005942(phosphatidylinositol 3-kinase complex);GO:0006629(lipid metabolic process);GO:0014065(phosphatidylinositol 3-kinase signaling);GO:0016020(membrane);GO:0016301(kinase activity);GO:0016303(1-phosphatidylinositol-3-kinase activity);GO:0016310(phosphorylation);GO:0016477(cell migration);GO:0016740(transferase activity);GO:0035004(phosphatid…	00562(Inositol phosphate metabolism);01100(Metabolic pathways);04070(Phosphatidylinositol signaling system);05132(Salmonella infection);05132(Salmonella infection)	K00923	EC:2.7.1.154	NA	phosphatidylinositol-4-phosphate 3-kinase catalytic subunit type 2 gamma [Source:VGNC Symbol;Acc:VGNC:91438]	protein_coding	7.54179	13.8181	7.95707	11.3847	10.8314	9.28545	9.54335	12.0141	8.70008	8.81684	8.06521	8.71335	2113	3689	2668	3037	3650	2947	3124	4171	3156	2902	2287	2534
ENSSSCG00000000599	chr5	56590980	56706458	-	DERA	100153841	ENSSSCT00000072550;ENSSSCT00000054879;ENSSSCT00000000644;ENSSSCT00000042388;ENSSSCT00000089789	GO:0003824(catalytic activity);GO:0004139(deoxyribose-phosphate aldolase activity);GO:0005654(nucleoplasm);GO:0005737(cytoplasm);GO:0009264(deoxyribonucleotide catabolic process);GO:0016052(carbohydrate catabolic process);GO:0016829(lyase activity);GO:0046121(deoxyribonucleoside catabolic process);GO:0046386(deoxyribose phosphate catabolic process);GO:0046386(deoxyribose phosphate catabolic proce…	00030(Pentose phosphate pathway);01100(Metabolic pathways);01100(Metabolic pathways)	K01619	EC:4.1.2.4	NA	deoxyribose-phosphate aldolase [Source:VGNC Symbol;Acc:VGNC:87260]	protein_coding	2.26786	2.25352	2.39255	1.86402	1.97518	2.28353	2.32614	3.24969	2.37124	2.59456	2.56085	2.22568	822	779	1038	644	861	939	985	1460	1113	1105	941	839
ENSSSCG00000000600	chr5	56876812	57005113	+	EPS8	100525921	ENSSSCT00000057743;ENSSSCT00000000645;ENSSSCT00000028702	GO:0003779(actin binding);GO:0005737(cytoplasm);GO:0005886(plasma membrane);GO:0005903(brush border);GO:0005938(cell cortex);GO:0007266(Rho protein signal transduction);GO:0008344(adult locomotory behavior);GO:0008360(regulation of cell shape);GO:0010458(exit from mitosis);GO:0014069(postsynaptic density);GO:0016601(Rac protein signal transduction);GO:0017146(NMDA selective glutamate receptor com…	NA	NA	NA	NA	epidermal growth factor receptor pathway substrate 8 [Source:VGNC Symbol;Acc:VGNC:87749]	protein_coding	12.9956	14.1376	10.6292	31.0239	26.3915	18.8512	16.0782	15.7379	13.1235	16.6746	10.0819	12.7686	3086	3199	3020	7015	7538	5072	4461	4631	4036	4652	2424	3148
ENSSSCG00000000601	chr5	57021178	57263340	-	PTPRO	100524563,10076	ENSSSCT00000027092;ENSSSCT00000000646	GO:0000902(cell morphogenesis);GO:0002548(monocyte chemotaxis);GO:0003093(regulation of glomerular filtration);GO:0004721(phosphoprotein phosphatase activity);GO:0004725(protein tyrosine phosphatase activity);GO:0005886(plasma membrane);GO:0006470(protein dephosphorylation);GO:0007411(axon guidance);GO:0016020(membrane);GO:0016021(integral component of membrane);GO:0016311(dephosphorylation);GO:0…	NA	K18035	EC:3.1.3.48	NA	protein tyrosine phosphatase receptor type O [Source:VGNC Symbol;Acc:VGNC:98226]	protein_coding	0.607299	0.157961	0.123701	0.599839	0.492082	0.292261	0.176159	0.0833828	0.202833	0.177019	0.0770072	0.0707995	191	48	47	180	186	104	65	33	83	66	25	24
ENSSSCG00000000602	chr5	57349382	57462804	+	RERG	100155884	ENSSSCT00000000647;ENSSSCT00000060747	GO:0001650(fibrillar center);GO:0003924(GTPase activity);GO:0005525(GTP binding);GO:0005634(nucleus);GO:0005654(nucleoplasm);GO:0005829(cytosol);GO:0005886(plasma membrane);GO:0007165(signal transduction);GO:0007265(Ras protein signal transduction);GO:0008285(negative regulation of cell population proliferation);GO:0009725(response to hormone);GO:0016020(membrane);GO:0019003(GDP binding);GO:00303…	NA	NA	NA	NA	RAS like estrogen regulated growth inhibitor [Source:VGNC Symbol;Acc:VGNC:92217]	protein_coding	3.41184	2.77797	0.76681	0.746979	1.30788	4.57206	2.6399	2.26806	2.65939	2.93239	2.82444	1.93804	369	286	99	77	170	560	333	303	372	372	309	217
ENSSSCG00000000605	chr5	57599802	57626628	+	ERP27	100153865	ENSSSCT00000000651	GO:0005783(endoplasmic reticulum);GO:0006457(protein folding);GO:0034976(response to endoplasmic reticulum stress)	NA	NA	NA	NA	endoplasmic reticulum protein 27 [Source:VGNC Symbol;Acc:VGNC:87781]	protein_coding	0.073394	0.159574	0.118265	0.16395	0.173866	0.319346	0.092355	0.142554	0.053923	0.270013	0.095677	0	7	14	13	14	18	32	10	16	6	28	9	0
ENSSSCG00000000607	chr5	57708897	57731827	+	ART4	100152653	ENSSSCT00000032957;ENSSSCT00000090995;ENSSSCT00000082345;ENSSSCT00000092585	GO:0003950(NAD+ ADP-ribosyltransferase activity);GO:0006471(protein ADP-ribosylation);GO:0016740(transferase activity);GO:0016757(glycosyltransferase activity);GO:0018120(peptidyl-arginine ADP-ribosylation);GO:0106274(NAD+-protein-arginine ADP-ribosyltransferase activity);GO:0106274(NAD+-protein-arginine ADP-ribosyltransferase activity)	NA	K06717	EC:2.4.2.31	NA	ADP-ribosyltransferase 4 [Source:VGNC Symbol;Acc:VGNC:103218]	protein_coding	5.32153	2.28635	1.69318	6.04493	4.7083	4.00663	4.65009	3.5192	3.70015	2.79592	2.11469	3.14073	1841	754	701	1990	1958	1570	1879	1508	1657	1137	741	1127
ENSSSCG00000000610	chr5	57740226	57746997	+	SMCO3	100511991	ENSSSCT00000000656	NA	NA	NA	NA	NA	single-pass membrane protein with coiled-coil domains 3 [Source:VGNC Symbol;Acc:VGNC:93245]	protein_coding	0.835309	0.440059	0.657783	0.311718	0.466134	0.242947	0.509381	0.444798	0.537456	0.307178	0.067512	0.810271	37	19	35	13	25	12	26	24	31	16	3	37
ENSSSCG00000000611	chr5	57750015	57768498	+	ENSSSCG00000000611		ENSSSCT00000077022	GO:0005681(spliceosomal complex);GO:0006396(RNA processing);GO:0045292(mRNA cis splicing, via spliceosome)	03040(Spliceosome)	NA	NA	NA		protein_coding	12.5608	13.0891	12.3194	15.0854	14.5483	12.7007	11.5273	12.7178	12.4787	12.4045	11.9956	11.4869	2583	2565	3031	2954	3599	2959	2770	3241	3322	2997	2498	2452
ENSSSCG00000000612	chr5	58022741	58133399	-	ATF7IP	100513013	ENSSSCT00000052005	GO:0000122(negative regulation of transcription by RNA polymerase II);GO:0003712(transcription coregulator activity);GO:0003714(transcription corepressor activity);GO:0005634(nucleus);GO:0005654(nucleoplasm);GO:0005667(transcription regulator complex);GO:0005829(cytosol);GO:0006306(DNA methylation);GO:0006355(regulation of DNA-templated transcription);GO:0016604(nuclear body);GO:0016887(ATP hydro…	NA	NA	NA	NA	activating transcription factor 7 interacting protein [Source:VGNC Symbol;Acc:VGNC:85611]	protein_coding	7.88429	10.2011	7.62118	11.2767	9.65813	10.3405	5.55748	6.20719	7.05746	7.3158	8.97271	7.67347	3008	3708	3478	4096	4431	4469	2477	2934	3486	3278	3465	3039
ENSSSCG00000000614	chr5	58480528	58927558	+	GRIN2B	100626022	ENSSSCT00000061900	GO:0004970(ionotropic glutamate receptor activity);GO:0004972(NMDA glutamate receptor activity);GO:0005216(ion channel activity);GO:0005886(plasma membrane);GO:0005887(integral component of plasma membrane);GO:0006811(ion transport);GO:0015276(ligand-gated ion channel activity);GO:0016020(membrane);GO:0016021(integral component of membrane);GO:0016594(glycine binding);GO:0017146(NMDA selective gl…	04014(Ras signaling pathway);04015(Rap1 signaling pathway);04024(cAMP signaling pathway);04080(Neuroactive ligand-receptor interaction);04713(Circadian entrainment);04720(Long-term potentiation);04724(Glutamatergic synapse);04728(Dopaminergic synapse);05010(Alzheimer disease);05014(Amyotrophic lateral sclerosis);05016(Huntington disease);05017(Spinocerebellar ataxia);05020(Prion disease);05022(Pa…	NA	NA	NA	glutamate ionotropic receptor NMDA type subunit 2B [Source:VGNC Symbol;Acc:VGNC:88684]	protein_coding	0	0	0	0	0	0	0	0	0	0	0.014145	0.032913	0	0	0	0	0	0	0	0	0	0	4	10
ENSSSCG00000000619	chr5	59413064	59491536	-	FAM234B	100514349	ENSSSCT00000060779	GO:0016020(membrane);GO:0016021(integral component of membrane)	NA	NA	NA	NA	family with sequence similarity 234 member B [Source:VGNC Symbol;Acc:VGNC:87964]	protein_coding	1.13272	1.08614	1.00184	0.661828	0.61428	0.956284	1.10021	1.06635	1.00169	0.981764	0.848652	0.785618	183	167	194	102	120	175	208	214	210	187	139	132
ENSSSCG00000000623	chr5	60332451	60357897	-	BCL2L14	100514901	ENSSSCT00000000669	GO:0005829(cytosol);GO:0006915(apoptotic process);GO:0019901(protein kinase binding);GO:0042981(regulation of apoptotic process);GO:0043229(intracellular organelle);GO:2001236(regulation of extrinsic apoptotic signaling pathway)	NA	NA	NA	NA	BCL2 like 14 [Source:VGNC Symbol;Acc:VGNC:85782]	protein_coding	0.763263	1.51647	0.424651	0.964171	0.707285	0.345924	0.553175	0.601603	0.565798	0.544077	0.291796	0.338654	138	261	92	166	154	71	117	135	132	116	54	64
ENSSSCG00000000625	chr5	60149028	60314662	+	LRP6	100515777	ENSSSCT00000039050	GO:0001933(negative regulation of protein phosphorylation);GO:0005041(low-density lipoprotein particle receptor activity);GO:0005102(signaling receptor binding);GO:0005109(frizzled binding);GO:0005769(early endosome);GO:0005794(Golgi apparatus);GO:0005886(plasma membrane);GO:0005901(caveola);GO:0006469(negative regulation of protein kinase activity);GO:0006897(endocytosis);GO:0009986(cell surface…	04150(mTOR signaling pathway);04310(Wnt signaling pathway);04928(Parathyroid hormone synthesis, secretion and action);05010(Alzheimer disease);05022(Pathways of neurodegeneration - multiple diseases);05200(Pathways in cancer);05224(Breast cancer);05225(Hepatocellular carcinoma);05226(Gastric cancer)	NA	NA	NA	LDL receptor related protein 6 [Source:VGNC Symbol;Acc:VGNC:89821]	protein_coding	5.5279	4.39554	6.34489	7.28118	6.50873	4.94833	5.44709	5.05535	5.05542	6.07813	4.39911	3.34388	1423	1079	1954	1785	2016	1444	1639	1613	1685	1838	1147	894
ENSSSCG00000000633	chr5	61337862	61361253	+	YBX3	100518125	ENSSSCT00000027246;ENSSSCT00000086287;ENSSSCT00000000680	GO:0000122(negative regulation of transcription by RNA polymerase II);GO:0000977(RNA polymerase II transcription regulatory region sequence-specific DNA binding);GO:0001701(in utero embryonic development);GO:0003676(nucleic acid binding);GO:0003677(DNA binding);GO:0003730(mRNA 3'-UTR binding);GO:0005634(nucleus);GO:0005737(cytoplasm);GO:0005829(cytosol);GO:0006915(apoptotic process);GO:0007283(sp…	04530(Tight junction);04530(Tight junction)	NA	NA	CSD	Y-box binding protein 3 [Source:VGNC Symbol;Acc:VGNC:95021]	protein_coding	142.549	145.644	91.9506	170.47	166.534	172.705	129.805	136.594	142.959	144.364	133.148	161.577	13264	12915	10238	15104	18638	18208	14112	15749	17223	15781	12543	15608
ENSSSCG00000000634	chr5	61397025	61421406	+	STYK1	100523437	ENSSSCT00000000681	GO:0004672(protein kinase activity);GO:0004713(protein tyrosine kinase activity);GO:0004715(non-membrane spanning protein tyrosine kinase activity);GO:0005102(signaling receptor binding);GO:0005524(ATP binding);GO:0005886(plasma membrane);GO:0006468(protein phosphorylation);GO:0007169(transmembrane receptor protein tyrosine kinase signaling pathway);GO:0016020(membrane);GO:0016021(integral compon…	NA	K17510	EC:2.7.10.2	NA	serine/threonine/tyrosine kinase 1 [Source:VGNC Symbol;Acc:VGNC:93601]	protein_coding	0.056922	0.059124	0.030534	0.014007	0.054475	0.099927	0	0.021293	0.023252	0.024022	0	0	16	16	11	4	19	32	0	8	9	8	0	0
ENSSSCG00000000635	chr5	61425694	61433947	+	ENSSSCG00000000635		ENSSSCT00000091974;ENSSSCT00000000682;ENSSSCT00000096877	GO:0005634(nucleus);GO:0005681(spliceosomal complex);GO:0008380(RNA splicing);GO:0035145(exon-exon junction complex);GO:0071013(catalytic step 2 spliceosome);GO:0071013(catalytic step 2 spliceosome)	03013(RNA transport);03015(mRNA surveillance pathway);03040(Spliceosome);03040(Spliceosome)	NA	NA	NA	mago homolog B, exon junction complex subunit [Source:VGNC Symbol;Acc:VGNC:108099]	protein_coding	5.07416	4.1616	4.46479	5.5898	5.31614	2.85409	4.95198	6.14219	4.93625	5.61349	4.08981	6.25688	260	204	274	274	328	166	297	391	328	338	213	333
ENSSSCG00000000636	chr5	61439602	61457839	+	ENSSSCG00000000636		ENSSSCT00000071176	GO:0005886(plasma membrane);GO:0016020(membrane);GO:0016021(integral component of membrane)	NA	NA	NA	NA	killer cell lectin-like receptor subfamily A, member 1 [Source:NCBI gene (formerly Entrezgene);Acc:397612]	protein_coding	0.285323	0	0.181409	0.188885	0.168183	0.210804	0.252983	0	0.321905	0.628501	0	0.185598	12	0	10	8	9	10	13	0	18	31	0	9
ENSSSCG00000000640	chr5	61624596	61629248	+	ENSSSCG00000000640		ENSSSCT00000000689	GO:0002223(stimulatory C-type lectin receptor signaling pathway);GO:0004888(transmembrane signaling receptor activity);GO:0005887(integral component of plasma membrane);GO:0009897(external side of plasma membrane);GO:0016020(membrane);GO:0016021(integral component of membrane);GO:0045954(positive regulation of natural killer cell mediated cytotoxicity)	04612(Antigen processing and presentation);04650(Natural killer cell mediated cytotoxicity);05332(Graft-versus-host disease)	NA	NA	NA		protein_coding	1.25954	0.326277	0.220494	0.730787	0.819608	1.05223	0.255181	0.840599	0.769101	0.455499	1.57661	0.506738	77	19	16	43	60	73	19	64	61	33	97	32
ENSSSCG00000000642	chr5	61666654	61673129	-	KLRD1	100622915	ENSSSCT00000077438;ENSSSCT00000082267	GO:0001915(negative regulation of T cell mediated cytotoxicity);GO:0002223(stimulatory C-type lectin receptor signaling pathway);GO:0002228(natural killer cell mediated immunity);GO:0005886(plasma membrane);GO:0005887(integral component of plasma membrane);GO:0016020(membrane);GO:0016021(integral component of membrane);GO:0023024(MHC class I protein complex binding);GO:0023030(MHC class Ib protei…	04612(Antigen processing and presentation);04650(Natural killer cell mediated cytotoxicity);05332(Graft-versus-host disease);05332(Graft-versus-host disease)	NA	NA	NA	killer cell lectin like receptor D1 [Source:VGNC Symbol;Acc:VGNC:103295]	protein_coding	0	0	0	0	0	0.254566	0	0	0.0498351	0	0	0	0	0	0	0	0	9	0	0	3	0	0	0
ENSSSCG00000000645	chr5	61758130	61767601	-	GABARAPL1	100462751	ENSSSCT00000000696	GO:0000045(autophagosome assembly);GO:0000421(autophagosome membrane);GO:0000422(autophagy of mitochondrion);GO:0005739(mitochondrion);GO:0005776(autophagosome);GO:0005829(cytosol);GO:0006914(autophagy);GO:0006995(cellular response to nitrogen starvation);GO:0016020(membrane);GO:0016236(macroautophagy);GO:0030957(Tat protein binding);GO:0031625(ubiquitin protein ligase binding);GO:0050811(GABA re…	04068(FoxO signaling pathway);04136(Autophagy - other);04137(Mitophagy - animal);04140(Autophagy - animal);04371(Apelin signaling pathway);04621(NOD-like receptor signaling pathway);04727(GABAergic synapse);05014(Amyotrophic lateral sclerosis);05022(Pathways of neurodegeneration - multiple diseases);05167(Kaposi sarcoma-associated herpesvirus infection)	NA	NA	NA	GABA type A receptor associated protein like 1 [Source:VGNC Symbol;Acc:VGNC:103282]	protein_coding	78.883	98.5448	77.733	113.139	109.141	104.881	62.6211	38.3764	57.5183	99.8539	66.5196	78.6641	7272	8657	8574	9931	12102	10955	6745	4384	6865	10814	6209	7529
ENSSSCG00000000647	chr5	61799286	61810624	+	OLR1	396724	ENSSSCT00000072126;ENSSSCT00000000698	GO:0005041(low-density lipoprotein particle receptor activity);GO:0005654(nucleoplasm);GO:0005886(plasma membrane);GO:0006897(endocytosis);GO:0006954(inflammatory response);GO:0007159(leukocyte cell-cell adhesion);GO:0008219(cell death);GO:0016020(membrane);GO:0016021(integral component of membrane);GO:0042157(lipoprotein metabolic process);GO:0042802(identical protein binding);GO:0043231(intrace…	03320(PPAR signaling pathway);04145(Phagosome);04145(Phagosome)	NA	NA	NA	oxidized low density lipoprotein receptor 1 [Source:VGNC Symbol;Acc:VGNC:91038]	protein_coding	4.24458	3.3033	0.74905	5.10255	4.4909	3.48806	2.71654	2.26831	1.68384	1.69826	1.9816	1.29141	518	385	110	593	659	482	387	343	267	244	245	164
ENSSSCG00000000648	chr5	61832954	61846434	+	CLEC7A	100038025	ENSSSCT00000086876;ENSSSCT00000000700;ENSSSCT00000000699;ENSSSCT00000033773;ENSSSCT00000000701	GO:0001872((1->3)-beta-D-glucan binding);GO:0005737(cytoplasm);GO:0006910(phagocytosis, recognition);GO:0008037(cell recognition);GO:0008284(positive regulation of cell population proliferation);GO:0009986(cell surface);GO:0010628(positive regulation of gene expression);GO:0016020(membrane);GO:0016021(integral component of membrane);GO:0016046(detection of fungus);GO:0030246(carbohydrate binding)…	04145(Phagosome);04625(C-type lectin receptor signaling pathway);05152(Tuberculosis);05152(Tuberculosis)	NA	NA	NA	C-type lectin domain containing 7A [Source:VGNC Symbol;Acc:VGNC:86758]	protein_coding	1.04278	0.263507	0.309794	1.04118	0.877707	1.53184	0.351673	0.174583	0.540257	0.0672028	0.373793	0	126	31	47	121	127	208	50	27	84	10	46	0
ENSSSCG00000000650	chr5	61889930	61946340	-	CLEC1B	100623580	ENSSSCT00000026674	GO:0004888(transmembrane signaling receptor activity);GO:0005887(integral component of plasma membrane);GO:0007165(signal transduction);GO:0016020(membrane);GO:0016021(integral component of membrane);GO:0030220(platelet formation)	04625(C-type lectin receptor signaling pathway)	NA	NA	NA	C-type lectin domain family 1 member B [Source:VGNC Symbol;Acc:VGNC:86751]	protein_coding	0	0	0	1.46641	0.7752	0.453093	0.191732	0	0	0	0	0	0	0	0	63	43	24	11	0	0	0	0	0
ENSSSCG00000000651	chr5	61908731	61915328	+	CLEC12B	100519958	ENSSSCT00000000705	GO:0002769(natural killer cell inhibitory signaling pathway);GO:0005886(plasma membrane);GO:0009897(external side of plasma membrane);GO:0016020(membrane);GO:0016021(integral component of membrane);GO:0019903(protein phosphatase binding);GO:0030545(signaling receptor regulator activity);GO:0030547(signaling receptor inhibitor activity);GO:0032991(protein-containing complex);GO:0045953(negative re…	NA	NA	NA	NA	C-type lectin domain family 12 member B [Source:VGNC Symbol;Acc:VGNC:86746]	protein_coding	0.908724	0.685289	0.719839	1.91858	2.41169	0.217797	1.06092	0.747581	0.180143	1.68464	1.00364	0.226882	43	31	40	85	135	12	58	43	11	92	48	11
ENSSSCG00000000653	chr5	62077988	62085900	+	CD69	397165	ENSSSCT00000000709	GO:0009897(external side of plasma membrane);GO:0009986(cell surface);GO:0016020(membrane);GO:0016021(integral component of membrane);GO:0032991(protein-containing complex);GO:0042802(identical protein binding);GO:0071466(cellular response to xenobiotic stimulus)	NA	NA	NA	NA	CD69 molecule [Source:VGNC Symbol;Acc:VGNC:103223]	protein_coding	0.495848	0.09991	0.039522	0.606825	0.617832	0.492213	0.172407	0.177402	1.33861	0.161687	0.172456	0.23882	42	8	4	49	63	47	17	19	145	16	15	21
ENSSSCG00000000656	chr5	61996760	62018895	+	CLEC2B	100520839,51266	ENSSSCT00000035827	GO:0009897(external side of plasma membrane);GO:0016020(membrane);GO:0016021(integral component of membrane);GO:0030246(carbohydrate binding)	05167(Kaposi sarcoma-associated herpesvirus infection)	NA	NA	NA	C-type lectin domain family 2, member B [Source:NCBI gene (formerly Entrezgene);Acc:100520839]	protein_coding	5.80484	5.42542	7.17827	13.8571	10.9079	8.52994	5.07444	6.22866	5.13825	9.35701	6.21977	2.91622	215	192	318	488	486	358	220	286	246	407	233	112
ENSSSCG00000000657	chr5	62187297	62204900	-	ENSSSCG00000000657		ENSSSCT00000034328	GO:0009897(external side of plasma membrane);GO:0016020(membrane);GO:0016021(integral component of membrane)	NA	NA	NA	NA		protein_coding	81.2029	64.1392	53.7064	87.0842	77.1452	67.9357	42.7151	53.9067	57.1119	76.0786	37.2464	55.068	5509	4147	4360	5626	6295	5222	3386	4532	5017	6063	2559	3879
ENSSSCG00000000659	chr5	62276897	62324333	+	ENSSSCG00000000659		ENSSSCT00000029587;ENSSSCT00000000715	GO:0004866(endopeptidase inhibitor activity);GO:0004867(serine-type endopeptidase inhibitor activity);GO:0005576(extracellular region);GO:0005615(extracellular space);GO:0010466(negative regulation of peptidase activity);GO:0010951(negative regulation of endopeptidase activity);GO:0030414(peptidase inhibitor activity);GO:0030414(peptidase inhibitor activity)	NA	NA	NA	NA		protein_coding	0.14991	0.0462069	0	0.171274	0.0612741	0	0.058623	0	0	0.044958	0.196392	0.0125678	32	10	0	36	16	0	15	0	0	12	43	3
ENSSSCG00000000660	chr5	62440810	62483678	+	A2M	403166,3494	ENSSSCT00000073778	GO:0001869(negative regulation of complement activation, lectin pathway);GO:0002020(protease binding);GO:0004866(endopeptidase inhibitor activity);GO:0004867(serine-type endopeptidase inhibitor activity);GO:0005102(signaling receptor binding);GO:0005576(extracellular region);GO:0005615(extracellular space);GO:0010466(negative regulation of peptidase activity);GO:0010951(negative regulation of end…	04610(Complement and coagulation cascades)	NA	NA	NA	alpha-2-macroglobulin [Source:VGNC Symbol;Acc:VGNC:103209]	protein_coding	4.35116	1.19921	1.44968	2.7844	5.55684	11.672	2.32071	0.868589	0.77306	3.462	0.909336	0.902191	1074	283	429	655	1650	3265	670	266	248	1004	228	232
ENSSSCG00000000661	chr5	62557776	62580651	-	PHC1	100155344	ENSSSCT00000031706;ENSSSCT00000000717	GO:0003677(DNA binding);GO:0003682(chromatin binding);GO:0005634(nucleus);GO:0005654(nucleoplasm);GO:0008270(zinc ion binding);GO:0016574(histone ubiquitination);GO:0031519(PcG protein complex);GO:0035102(PRC1 complex);GO:0042393(histone binding);GO:0045892(negative regulation of DNA-templated transcription);GO:0046872(metal ion binding);GO:0046872(metal ion binding)	NA	NA	NA	NA	polyhomeotic homolog 1 [Source:VGNC Symbol;Acc:VGNC:91370]	protein_coding	5.84226	7.74796	5.60728	9.16809	9.3375	7.39191	7.72092	6.77347	7.40001	7.88057	6.02548	6.73274	1112	1405	1277	1661	2137	1594	1717	1597	1823	1762	1161	1331
ENSSSCG00000000663	chr5	62507507	62523810	-	KLRG1	100738680	ENSSSCT00000000719	GO:0016020(membrane);GO:0016021(integral component of membrane);GO:0043231(intracellular membrane-bounded organelle)	NA	NA	NA	NA	killer cell lectin like receptor G1 [Source:HGNC Symbol;Acc:HGNC:6380]	protein_coding	1.48698	1.60835	2.05816	1.3746	1.63223	0.775521	0.713995	1.25439	0.51926	1.53058	1.24436	2.69836	48	50	80	43	64	29	27	50	22	58	41	90
ENSSSCG00000000664	chr5	62609408	62648400	-	A2ML1	100152492	ENSSSCT00000061700;ENSSSCT00000000720	GO:0002020(protease binding);GO:0004866(endopeptidase inhibitor activity);GO:0004867(serine-type endopeptidase inhibitor activity);GO:0005576(extracellular region);GO:0005615(extracellular space);GO:0010466(negative regulation of peptidase activity);GO:0010951(negative regulation of endopeptidase activity);GO:0030414(peptidase inhibitor activity);GO:0052548(regulation of endopeptidase activity);G…	NA	NA	NA	NA	alpha-2-macroglobulin like 1 [Source:VGNC Symbol;Acc:VGNC:103210]	protein_coding	0.338684	0.421314	0.081996	0.163568	0.228345	0.647928	0.066781	0.0397848	0.200477	0.191528	0.168262	0.0821389	74	88	22	34	60	161	17	11	57	49	38	19
ENSSSCG00000000665	chr5	62676225	62715067	-	RIMKLB	100152915	ENSSSCT00000000721	GO:0000166(nucleotide binding);GO:0005524(ATP binding);GO:0005737(cytoplasm);GO:0016879(ligase activity, forming carbon-nitrogen bonds);GO:0046872(metal ion binding);GO:0072590(N-acetyl-L-aspartate-L-glutamate ligase activity);GO:0072591(citrate-L-glutamate ligase activity)	00250(Alanine, aspartate and glutamate metabolism);01100(Metabolic pathways)	K18310	EC:6.3.1.17;EC:6.3.2.41	NA	ribosomal modification protein rimK like family member B [Source:VGNC Symbol;Acc:VGNC:92308]	protein_coding	7.11672	5.63351	1.83958	5.38963	5.56503	6.14541	3.98865	3.89849	6.23267	4.64421	4.13535	4.97738	1726	1302	534	1245	1623	1689	1130	1172	1957	1323	1016	1253
ENSSSCG00000000667	chr5	62777352	62787369	+	AICDA	100526050	ENSSSCT00000000723	GO:0000932(P-body);GO:0003723(RNA binding);GO:0003824(catalytic activity);GO:0004126(cytidine deaminase activity);GO:0005634(nucleus);GO:0005737(cytoplasm);GO:0008270(zinc ion binding);GO:0009972(cytidine deamination);GO:0010529(negative regulation of transposition);GO:0016445(somatic diversification of immunoglobulins);GO:0016446(somatic hypermutation of immunoglobulin genes);GO:0016554(cytidine…	04672(Intestinal immune network for IgA production);05340(Primary immunodeficiency)	K10989	EC:3.5.4.38	NA	activation induced cytidine deaminase [Source:VGNC Symbol;Acc:VGNC:85196]	protein_coding	0	0	0	0	0.026133	0	0	0	0	0	0	0	0	0	0	0	4	0	0	0	0	0	0	0
ENSSSCG00000000672	chr5	63572081	63599482	-	CLSTN3	100511695	ENSSSCT00000037575;ENSSSCT00000047102;ENSSSCT00000000728	GO:0000139(Golgi membrane);GO:0001540(amyloid-beta binding);GO:0001558(regulation of cell growth);GO:0005509(calcium ion binding);GO:0005783(endoplasmic reticulum);GO:0005794(Golgi apparatus);GO:0005886(plasma membrane);GO:0007156(homophilic cell adhesion via plasma membrane adhesion molecules);GO:0007416(synapse assembly);GO:0009986(cell surface);GO:0014069(postsynaptic density);GO:0016020(membr…	NA	NA	NA	NA	calsyntenin 3 [Source:VGNC Symbol;Acc:VGNC:86786]	protein_coding	18.5833	17.8595	12.8301	9.63021	9.7117	11.575	14.4279	15.0508	26.8788	22.1322	16.4389	23.8801	4369	4001	3609	2156	2747	3084	3963	4384	8180	6111	3913	5827
ENSSSCG00000000679	chr5	63809546	63817225	-	LRRC23	100155745	ENSSSCT00000000740;ENSSSCT00000089742	NA	NA	NA	NA	NA	leucine rich repeat containing 23 [Source:VGNC Symbol;Acc:VGNC:103298]	protein_coding	0.57992	0.828328	0.673953	0.714992	0.321337	0	0.54129	0.462869	0.206773	0.445417	1.00927	1.0062	25	33	34	29	17	0	27	24	12	22	43	44
ENSSSCG00000000680	chr5	63885715	63891219	-	GPR162	100736664	ENSSSCT00000000741	GO:0004930(G protein-coupled receptor activity);GO:0007186(G protein-coupled receptor signaling pathway);GO:0016020(membrane);GO:0016021(integral component of membrane)	NA	NA	NA	NA	G protein-coupled receptor 162 [Source:VGNC Symbol;Acc:VGNC:88614]	protein_coding	0.08001	0.028288	0.0535	0.084029	0.069376	0.164935	0.02638	0	0.132142	0	0.028322	0	10	4	8	10	11	24	4	0	22	0	4	0
ENSSSCG00000000681	chr5	63871508	63885034	-	P3H3	100156539	ENSSSCT00000000742	GO:0005506(iron ion binding);GO:0005783(endoplasmic reticulum);GO:0008285(negative regulation of cell population proliferation);GO:0016491(oxidoreductase activity);GO:0016705(oxidoreductase activity, acting on paired donors, with incorporation or reduction of molecular oxygen);GO:0017185(peptidyl-lysine hydroxylation);GO:0019511(peptidyl-proline hydroxylation);GO:0019797(procollagen-proline 3-dio…	NA	K22460	EC:1.14.11.7	NA	prolyl 3-hydroxylase 3 [Source:VGNC Symbol;Acc:VGNC:91131]	protein_coding	13.8128	12.2435	31.7255	24.4775	23.5493	19.4903	24.6009	21.4653	15.1056	24.0086	16.7706	16.2887	1809	1528	4970	3052	3709	2891	3763	3482	2561	3693	2223	2214
ENSSSCG00000000682	chr5	63863661	63870433	-	GNB3	100154522	ENSSSCT00000000743	GO:0005737(cytoplasm);GO:0005834(heterotrimeric G-protein complex);GO:0006884(cell volume homeostasis);GO:0007165(signal transduction);GO:0007186(G protein-coupled receptor signaling pathway);GO:0010468(regulation of gene expression);GO:0010906(regulation of glucose metabolic process);GO:0030159(signaling receptor complex adaptor activity);GO:0030425(dendrite);GO:0032350(regulation of hormone met…	04014(Ras signaling pathway);04062(Chemokine signaling pathway);04151(PI3K-Akt signaling pathway);04371(Apelin signaling pathway);04713(Circadian entrainment);04723(Retrograde endocannabinoid signaling);04724(Glutamatergic synapse);04725(Cholinergic synapse);04726(Serotonergic synapse);04727(GABAergic synapse);04728(Dopaminergic synapse);04742(Taste transduction);04926(Relaxin signaling pathway);…	NA	NA	NA	G protein subunit beta 3 [Source:VGNC Symbol;Acc:VGNC:88532]	protein_coding	0.99018	0.944842	1.90155	1.55283	1.24029	1.01784	2.17403	1.66032	1.2878	1.05713	1.14328	1.03969	80	73	183	119	120	93	205	166	134	100	93	87
ENSSSCG00000000683	chr5	63859541	63861900	+	CDCA3	100153312	ENSSSCT00000065022;ENSSSCT00000000744	GO:0005912(adherens junction);GO:0051301(cell division);GO:0051301(cell division)	NA	NA	NA	NA	cell division cycle associated 3 [Source:VGNC Symbol;Acc:VGNC:86466]	protein_coding	0.925023	1.60492	1.91758	0.829972	1.06187	1.08833	1.03028	2.12929	1.7835	0.423933	0.425557	0.602575	56	92	136	48	77	74	72	158	138	31	26	38
ENSSSCG00000000684	chr5	63843745	63858716	-	USP5	100155342	ENSSSCT00000000745;ENSSSCT00000068381;ENSSSCT00000074654;ENSSSCT00000074947	GO:0004197(cysteine-type endopeptidase activity);GO:0004843(cysteine-type deubiquitinase activity);GO:0005634(nucleus);GO:0005829(cytosol);GO:0006508(proteolysis);GO:0006511(ubiquitin-dependent protein catabolic process);GO:0008233(peptidase activity);GO:0008234(cysteine-type peptidase activity);GO:0008270(zinc ion binding);GO:0016579(protein deubiquitination);GO:0016787(hydrolase activity);GO:00…	NA	K11836	EC:3.4.19.12	NA	ubiquitin specific peptidase 5 [Source:VGNC Symbol;Acc:VGNC:94772]	protein_coding	34.5719	29.0987	44.9076	34.4308	35.0875	36.2794	38.0402	41.6868	37.5074	31.8832	48.0913	31.009	5824	4671	9050	5522	7109	6924	7486	8701	8180	6310	8202	5423
ENSSSCG00000000685	chr5	63839255	63843134	-	TPI1	100157582	ENSSSCT00000063554;ENSSSCT00000000746;ENSSSCT00000050301	GO:0004807(triose-phosphate isomerase activity);GO:0005829(cytosol);GO:0006006(glucose metabolic process);GO:0006094(gluconeogenesis);GO:0006096(glycolytic process);GO:0008929(methylglyoxal synthase activity);GO:0016829(lyase activity);GO:0016853(isomerase activity);GO:0019682(glyceraldehyde-3-phosphate metabolic process);GO:0031625(ubiquitin protein ligase binding);GO:0042803(protein homodimeriz…	00010(Glycolysis / Gluconeogenesis);00051(Fructose and mannose metabolism);00562(Inositol phosphate metabolism);01100(Metabolic pathways);01200(Carbon metabolism);01230(Biosynthesis of amino acids);01230(Biosynthesis of amino acids)	K01803	EC:5.3.1.1	NA	triosephosphate isomerase 1 [Source:NCBI gene (formerly Entrezgene);Acc:100157582]	protein_coding	174.166	178.726	197.979	136.06	138.548	156.734	185.329	222.822	192.234	158.732	252.212	184.182	14813	14485	20144	11018	14173	15102	18415	23479	21166	15858	21716	16261
ENSSSCG00000000687	chr5	63892137	63918519	-	CD4	404704	ENSSSCT00000030772;ENSSSCT00000000749;ENSSSCT00000000748	GO:0001934(positive regulation of protein phosphorylation);GO:0002250(adaptive immune response);GO:0002376(immune system process);GO:0005886(plasma membrane);GO:0005887(integral component of plasma membrane);GO:0006955(immune response);GO:0007155(cell adhesion);GO:0008270(zinc ion binding);GO:0009897(external side of plasma membrane);GO:0009986(cell surface);GO:0015026(coreceptor activity);GO:001…	04060(Cytokine-cytokine receptor interaction);04514(Cell adhesion molecules);04612(Antigen processing and presentation);04640(Hematopoietic cell lineage);04658(Th1 and Th2 cell differentiation);04659(Th17 cell differentiation);04660(T cell receptor signaling pathway);05135(Yersinia infection);05166(Human T-cell leukemia virus 1 infection);05170(Human immunodeficiency virus 1 infection);05235(PD-L…	NA	NA	NA	CD4 molecule [Source:VGNC Symbol;Acc:VGNC:86417]	protein_coding	2.42252	0.427228	0.332335	0.657353	0.817253	0.511485	0.170346	0.281396	1.27967	0.390467	0.192287	0.791939	358	60	59	93	145	86	30	52	245	69	29	121
ENSSSCG00000000688	chr5	63929625	63935410	-	LAG3	100125962	ENSSSCT00000000750	GO:0002270(plasmacytoid dendritic cell activation);GO:0004888(transmembrane signaling receptor activity);GO:0005576(extracellular region);GO:0007166(cell surface receptor signaling pathway);GO:0009897(external side of plasma membrane);GO:0016020(membrane);GO:0016021(integral component of membrane);GO:0032703(negative regulation of interleukin-2 production);GO:0042110(T cell activation);GO:0042267…	NA	NA	NA	NA	lymphocyte activating 3 [Source:VGNC Symbol;Acc:VGNC:89617]	protein_coding	0.761651	0.564646	0.978274	0.51087	0.301496	0.286824	0.162722	0.41724	0.250215	0.26326	0.276291	0.142505	70	50	108	45	34	30	18	48	30	29	26	14
ENSSSCG00000000690	chr5	63951722	63957141	+	MLF2	100736734	ENSSSCT00000000752;ENSSSCT00000051298;ENSSSCT00000080079	GO:0005634(nucleus);GO:0005737(cytoplasm);GO:0006355(regulation of DNA-templated transcription);GO:0016020(membrane);GO:0016021(integral component of membrane);GO:0016021(integral component of membrane)	NA	NA	NA	NA	myeloid leukemia factor 2 [Source:VGNC Symbol;Acc:VGNC:103302]	protein_coding	106.508	93.4321	111.616	95.1962	94.7532	112.98	118.009	110.581	103.942	84.8863	121.805	88.9977	8749	7313	10970	7445	9362	10514	11326	11255	11055	8191	10129	7589
ENSSSCG00000000691	chr5	63957064	63977424	-	COPS7A	100157341	ENSSSCT00000049774;ENSSSCT00000076460;ENSSSCT00000100369;ENSSSCT00000000753;ENSSSCT00000085435	GO:0000338(protein deneddylation);GO:0005634(nucleus);GO:0005654(nucleoplasm);GO:0005737(cytoplasm);GO:0005829(cytosol);GO:0008180(COP9 signalosome);GO:0010387(COP9 signalosome assembly);GO:0010387(COP9 signalosome assembly)	NA	NA	NA	NA	COP9 signalosome subunit 7A [Source:VGNC Symbol;Acc:VGNC:86902]	protein_coding	11.9612	12.0283	10.0542	8.19287	9.30103	11.1392	9.61364	10.3845	11.2835	10.4373	13.2586	10.8253	2743	2628	2758	1790	2565	2893	2576	2951	3349	2811	3078	2577
ENSSSCG00000000693	chr5	64136505	64167410	-	NCAPD2	102164405	ENSSSCT00000079331;ENSSSCT00000000755	GO:0000228(nuclear chromosome);GO:0000278(mitotic cell cycle);GO:0000779(condensed chromosome, centromeric region);GO:0000793(condensed chromosome);GO:0000796(condensin complex);GO:0005634(nucleus);GO:0005654(nucleoplasm);GO:0005694(chromosome);GO:0005737(cytoplasm);GO:0005829(cytosol);GO:0007049(cell cycle);GO:0007076(mitotic chromosome condensation);GO:0010032(meiotic chromosome condensation);G…	NA	NA	NA	NA	non-SMC condensin I complex subunit D2 [Source:VGNC Symbol;Acc:VGNC:90597]	protein_coding	2.88789	3.30576	3.53877	4.45695	3.33142	3.05905	2.72192	3.18951	3.31708	3.11653	2.48773	2.70168	751	820	1100	1104	1042	902	828	1027	1117	952	655	729
ENSSSCG00000000694	chr5	64129679	64133991	-	GAPDH	396823,100240709	ENSSSCT00000000756;ENSSSCT00000043459	GO:0000166(nucleotide binding);GO:0000226(microtubule cytoskeleton organization);GO:0001819(positive regulation of cytokine production);GO:0002376(immune system process);GO:0004365(glyceraldehyde-3-phosphate dehydrogenase (NAD+) (phosphorylating) activity);GO:0005634(nucleus);GO:0005737(cytoplasm);GO:0005811(lipid droplet);GO:0005829(cytosol);GO:0005856(cytoskeleton);GO:0005886(plasma membrane);G…	00010(Glycolysis / Gluconeogenesis);01100(Metabolic pathways);01200(Carbon metabolism);01230(Biosynthesis of amino acids);04066(HIF-1 signaling pathway);05010(Alzheimer disease);05132(Salmonella infection);05132(Salmonella infection)	K00134	EC:1.2.1.12	NA	glyceraldehyde-3-phosphate dehydrogenase [Source:VGNC Symbol;Acc:VGNC:103283]	protein_coding	1292.46	1292.07	1332.01	989.312	1050.54	1237.99	1427.4	1518.19	1118.42	1012.35	2164.24	1304.4	79123	75376	97560	57668	77356	85867	102098	115160	88645	72804	134140	82897
ENSSSCG00000000695	chr5	64116154	64129268	+	IFFO1	100515778	ENSSSCT00000083719;ENSSSCT00000000757;ENSSSCT00000068449	GO:0005882(intermediate filament);GO:0005882(intermediate filament)	NA	NA	NA	NA	intermediate filament family orphan 1 [Source:VGNC Symbol;Acc:VGNC:89030]	protein_coding	8.57022	10.7418	10.6168	11.0391	10.5271	6.84011	7.67641	6.85894	6.48486	11.0323	5.31	8.15739	2486	2969	3683	3049	3672	2247	2601	2464	2435	3758	1560	2457
ENSSSCG00000000696	chr5	64106098	64115579	+	NOP2	100516080	ENSSSCT00000000758	GO:0000027(ribosomal large subunit assembly);GO:0000470(maturation of LSU-rRNA);GO:0001510(RNA methylation);GO:0003723(RNA binding);GO:0005730(nucleolus);GO:0006396(RNA processing);GO:0008168(methyltransferase activity);GO:0008284(positive regulation of cell population proliferation);GO:0008757(S-adenosylmethionine-dependent methyltransferase activity);GO:0009383(rRNA (cytosine-C5-)-methyltransfe…	NA	K14835	EC:2.1.1.310	NA	NOP2 nucleolar protein [Source:VGNC Symbol;Acc:VGNC:103306]	protein_coding	13.6931	12.9333	13.1563	17.5495	16.0695	13.7132	20.7768	19.3313	13.8206	16.1658	11.7163	12.5212	1755	1579	2017	2141	2477	1991	3110	3069	2293	2433	1520	1666
ENSSSCG00000000697	chr5	64065992	64105173	+	CHD4	100515610	ENSSSCT00000003736;ENSSSCT00000058324	GO:0000122(negative regulation of transcription by RNA polymerase II);GO:0000166(nucleotide binding);GO:0000781(chromosome, telomeric region);GO:0000785(chromatin);GO:0001221(transcription coregulator binding);GO:0003677(DNA binding);GO:0003678(DNA helicase activity);GO:0003682(chromatin binding);GO:0004386(helicase activity);GO:0005524(ATP binding);GO:0005634(nucleus);GO:0005654(nucleoplasm);GO:…	05165(Human papillomavirus infection);05203(Viral carcinogenesis);05203(Viral carcinogenesis)	K11643	EC:3.6.4.12	NA	chromodomain helicase DNA binding protein 4 [Source:VGNC Symbol;Acc:VGNC:99707]	protein_coding	23.5688	21.542	25.1004	25.5206	23.2448	21.8976	31.2502	26.3258	19.1516	25.5087	17.9166	18.1206	8186	7129	10429	8439	9710	8616	12680	11328	8612	10407	6300	6533
ENSSSCG00000000699	chr5	64058501	64059604	+	LPAR5	102161415	ENSSSCT00000000761	GO:0004930(G protein-coupled receptor activity);GO:0007165(signal transduction);GO:0007186(G protein-coupled receptor signaling pathway);GO:0016020(membrane);GO:0016021(integral component of membrane);GO:0032793(positive regulation of CREB transcription factor activity);GO:0048266(behavioral response to pain)	04015(Rap1 signaling pathway);04072(Phospholipase D signaling pathway);04151(PI3K-Akt signaling pathway);04810(Regulation of actin cytoskeleton);05200(Pathways in cancer)	NA	NA	NA	lysophosphatidic acid receptor 5 [Source:VGNC Symbol;Acc:VGNC:89787]	protein_coding	0.386347	0.302474	0.400901	0.105433	0.594353	0.360913	0.297904	0.536664	0.85979	0.346795	0.367327	0.065201	21	16	26	6	38	22	19	35	59	22	20	4
ENSSSCG00000000700	chr5	64037095	64047847	+	ACRBP	397317	ENSSSCT00000092092	GO:0001669(acrosomal vesicle);GO:0001675(acrosome assembly);GO:0007286(spermatid development);GO:0009566(fertilization)	NA	NA	NA	NA	acrosin binding protein [Source:VGNC Symbol;Acc:VGNC:85029]	protein_coding	1.81204	2.00772	1.57355	1.07164	1.36936	2.50382	1.41753	1.08799	2.24871	0.931509	1.37519	1.89425	175	185	182	99	159	273	160	130	281	106	134	190
ENSSSCG00000000702	chr5	64003216	64025796	+	ZNF384	100516975	ENSSSCT00000091133;ENSSSCT00000074408;ENSSSCT00000000764;ENSSSCT00000103941	GO:0000977(RNA polymerase II transcription regulatory region sequence-specific DNA binding);GO:0000981(DNA-binding transcription factor activity, RNA polymerase II-specific);GO:0006357(regulation of transcription by RNA polymerase II);GO:0006357(regulation of transcription by RNA polymerase II)	NA	NA	NA	zf-C2H2	zinc finger protein 384 [Source:HGNC Symbol;Acc:HGNC:11955]	protein_coding	14.6706	16.7729	13.3237	14.2683	13.8817	14.5875	15.7783	15.2522	14.7732	14.7979	12.1199	14.4288	2516	2741	2733	2329	2863	2835	3161	3240	3278	2981	2104	2568
ENSSSCG00000000703	chr5	64181491	64188273	+	ENSSSCG00000000703		ENSSSCT00000000765;ENSSSCT00000071347	GO:0005484(SNAP receptor activity);GO:0005886(plasma membrane);GO:0006906(vesicle fusion);GO:0016020(membrane);GO:0016021(integral component of membrane);GO:0016192(vesicle-mediated transport);GO:0019905(syntaxin binding);GO:0031201(SNARE complex);GO:0035493(SNARE complex assembly);GO:0110165(cellular anatomical entity);GO:0110165(cellular anatomical entity)	04130(SNARE interactions in vesicular transport);04130(SNARE interactions in vesicular transport)	NA	NA	NA	vesicle associated membrane protein 1 [Source:VGNC Symbol;Acc:VGNC:94793]	protein_coding	0.40004	0.587685	0.528173	1.62281	1.62307	1.53147	0.118864	0.195169	0.195887	0.582879	0.414542	0.580862	124	173	195	476	600	534	44	75	79	211	130	187
ENSSSCG00000000704	chr5	64188190	64197264	-	TAPBPL	100520908	ENSSSCT00000000766;ENSSSCT00000000767;ENSSSCT00000041672;ENSSSCT00000057268	GO:0002502(peptide antigen assembly with MHC class I protein complex);GO:0002590(negative regulation of antigen processing and presentation of peptide antigen via MHC class I);GO:0003823(antigen binding);GO:0004888(transmembrane signaling receptor activity);GO:0005783(endoplasmic reticulum);GO:0009897(external side of plasma membrane);GO:0016020(membrane);GO:0016021(integral component of membrane…	NA	NA	NA	NA	TAP binding protein like [Source:VGNC Symbol;Acc:VGNC:93735]	protein_coding	10.4308	11.1831	9.46062	8.668	8.88665	9.94737	8.95232	11.4989	9.49961	12.6535	7.80258	10.3578	1662	1698	1804	1315	1702	1795	1666	2269	1958	2367	1259	1712
ENSSSCG00000000706	chr5	64270310	64278469	-	LTBR	100520196	ENSSSCT00000056124;ENSSSCT00000074386	GO:0005794(Golgi apparatus);GO:0006955(immune response);GO:0016020(membrane);GO:0016021(integral component of membrane);GO:0031625(ubiquitin protein ligase binding);GO:0042802(identical protein binding);GO:0043011(myeloid dendritic cell differentiation);GO:0043123(positive regulation of I-kappaB kinase/NF-kappaB signaling);GO:0046330(positive regulation of JNK cascade);GO:0048534(hematopoietic or…	04060(Cytokine-cytokine receptor interaction);04061(Viral protein interaction with cytokine and cytokine receptor);04064(NF-kappa B signaling pathway);04066(HIF-1 signaling pathway);04672(Intestinal immune network for IgA production);05166(Human T-cell leukemia virus 1 infection);05203(Viral carcinogenesis);05203(Viral carcinogenesis)	NA	NA	NA	lymphotoxin beta receptor [Source:VGNC Symbol;Acc:VGNC:89889]	protein_coding	25.9143	24.3076	24.8259	32.3705	28.7489	23.5651	24.8149	24.7484	22.7385	32.7139	21.5667	25.7413	3804	3400	4359	4524	5075	3919	4255	4500	4321	5640	3205	3922
ENSSSCG00000000707	chr5	64287630	64313612	+	SCNN1A	396608	ENSSSCT00000044695;ENSSSCT00000040390;ENSSSCT00000000769	GO:0005272(sodium channel activity);GO:0005737(cytoplasm);GO:0005887(integral component of plasma membrane);GO:0006814(sodium ion transport);GO:0006883(cellular sodium ion homeostasis);GO:0015280(ligand-gated sodium channel activity);GO:0016020(membrane);GO:0016021(integral component of membrane);GO:0016324(apical plasma membrane);GO:0031514(motile cilium);GO:0034706(sodium channel complex);GO:00…	04742(Taste transduction);04960(Aldosterone-regulated sodium reabsorption);04960(Aldosterone-regulated sodium reabsorption)	NA	NA	NA	sodium channel epithelial 1 subunit alpha [Source:VGNC Symbol;Acc:VGNC:92640]	protein_coding	0.255362	0.223935	0.675656	1.12465	0.863917	0.369262	0.244279	0.3439	0.173324	0.309501	0.270662	0.242842	45	38	143	189	184	74	51	75	40	64	49	45
ENSSSCG00000000708	chr5	64319073	64331897	+	TNFRSF1A	397020	ENSSSCT00000102588;ENSSSCT00000000771;ENSSSCT00000052544	GO:0000139(Golgi membrane);GO:0003176(aortic valve development);GO:0003177(pulmonary valve development);GO:0003332(negative regulation of extracellular matrix constituent secretion);GO:0005031(tumor necrosis factor receptor activity);GO:0005615(extracellular space);GO:0005739(mitochondrion);GO:0005794(Golgi apparatus);GO:0005886(plasma membrane);GO:0006366(transcription by RNA polymerase II);GO:0…	04010(MAPK signaling pathway);04060(Cytokine-cytokine receptor interaction);04061(Viral protein interaction with cytokine and cytokine receptor);04064(NF-kappa B signaling pathway);04071(Sphingolipid signaling pathway);04150(mTOR signaling pathway);04210(Apoptosis);04215(Apoptosis - multiple species);04217(Necroptosis);04380(Osteoclast differentiation);04668(TNF signaling pathway);04920(Adipocyto…	NA	NA	NA	TNF receptor superfamily member 1A [Source:NCBI gene (formerly Entrezgene);Acc:397020]	protein_coding	44.045	35.9746	29.2799	44.3857	47.1456	46.7915	49.2492	50.0611	40.6894	45.9883	41.4011	42.8339	5109	3976	4064	4902	6576	6149	6674	7194	6111	6266	4861	5158
ENSSSCG00000000709	chr5	64332066	64350710	-	PLEKHG6	100520565	ENSSSCT00000080713;ENSSSCT00000000772;ENSSSCT00000060629;ENSSSCT00000052051	GO:0005085(guanyl-nucleotide exchange factor activity);GO:0005096(GTPase activator activity);GO:0005813(centrosome);GO:0030054(cell junction);GO:0050790(regulation of catalytic activity);GO:0050790(regulation of catalytic activity)	NA	NA	NA	NA	pleckstrin homology and RhoGEF domain containing G6 [Source:VGNC Symbol;Acc:VGNC:91548]	protein_coding	0.714469	0.622568	1.44375	1.00495	1.52773	1.26058	0.573267	0.377022	0.126033	0.406805	0.522769	0.438185	138	115	335	185	355	276	129	90	33	92	102	88
ENSSSCG00000000712	chr5	64519186	65002452	+	VWF	399543	ENSSSCT00000000775;ENSSSCT00000036466;ENSSSCT00000077273	GO:0002020(protease binding);GO:0005178(integrin binding);GO:0005229(intracellular calcium activated chloride channel activity);GO:0005254(chloride channel activity);GO:0005518(collagen binding);GO:0005576(extracellular region);GO:0005783(endoplasmic reticulum);GO:0005886(plasma membrane);GO:0007155(cell adhesion);GO:0007596(blood coagulation);GO:0007599(hemostasis);GO:0016020(membrane);GO:001602…	04151(PI3K-Akt signaling pathway);04510(Focal adhesion);04512(ECM-receptor interaction);04610(Complement and coagulation cascades);04611(Platelet activation);04740(Olfactory transduction);05165(Human papillomavirus infection);05171(Coronavirus disease - COVID-19);05171(Coronavirus disease - COVID-19)	NA	NA	NA	von Willebrand factor [Source:VGNC Symbol;Acc:VGNC:104094]	protein_coding	40.7731	40.1979	33.515	40.2859	41.4073	42.302	35.8158	26.1372	21.0132	43.1443	29.8096	28.6252	23971	22522	23574	22552	29281	28178	24603	19040	15995	29798	17745	17471
ENSSSCG00000000716	chr5	65561962	65565116	-	KCNA1	100048962	ENSSSCT00000000779	GO:0001964(startle response);GO:0005216(ion channel activity);GO:0005244(voltage-gated ion channel activity);GO:0005249(voltage-gated potassium channel activity);GO:0005251(delayed rectifier potassium channel activity);GO:0005267(potassium channel activity);GO:0005887(integral component of plasma membrane);GO:0006811(ion transport);GO:0006813(potassium ion transport);GO:0007405(neuroblast prolife…	NA	NA	NA	NA	potassium voltage-gated channel subfamily A member 1 [Source:VGNC Symbol;Acc:VGNC:89323]	protein_coding	0.029893	0	0.076887	0	0	0	0.012793	0.032141	0.023089	0	0	0	4	0	13	0	0	0	2	6	4	0	0	0
ENSSSCG00000000719	chr5	65759727	65788646	-	NDUFA9	100524622	ENSSSCT00000000782;ENSSSCT00000040924	GO:0003954(NADH dehydrogenase activity);GO:0005739(mitochondrion);GO:0005743(mitochondrial inner membrane);GO:0005747(mitochondrial respiratory chain complex I);GO:0005759(mitochondrial matrix);GO:0007623(circadian rhythm);GO:0031966(mitochondrial membrane);GO:0032981(mitochondrial respiratory chain complex I assembly);GO:0044877(protein-containing complex binding);GO:1901006(ubiquinone-6 biosynt…	00190(Oxidative phosphorylation);01100(Metabolic pathways);04714(Thermogenesis);04723(Retrograde endocannabinoid signaling);04932(Non-alcoholic fatty liver disease);05010(Alzheimer disease);05012(Parkinson disease);05014(Amyotrophic lateral sclerosis);05016(Huntington disease);05020(Prion disease);05022(Pathways of neurodegeneration - multiple diseases);05022(Pathways of neurodegeneration - multi…	NA	NA	NA	NADH:ubiquinone oxidoreductase subunit A9 [Source:VGNC Symbol;Acc:VGNC:98149]	protein_coding	65.6543	63.064	58.3905	48.6036	52.861	66.9792	57.8621	76.724	81.0126	51.4395	102.438	69.4227	5512	5046	5865	3886	5338	6371	5676	7981	8806	5073	8707	6051
ENSSSCG00000000720	chr5	65797376	65819765	+	AKAP3	100337663	ENSSSCT00000064398	GO:0001669(acrosomal vesicle);GO:0001835(blastocyst hatching);GO:0007178(transmembrane receptor protein serine/threonine kinase signaling pathway);GO:0008104(protein localization);GO:0016301(kinase activity);GO:0016310(phosphorylation);GO:0031514(motile cilium);GO:0035686(sperm fibrous sheath);GO:0051018(protein kinase A binding);GO:0097225(sperm midpiece);GO:0097228(sperm principal piece);GO:011…	NA	NA	NA	NA	A-kinase anchoring protein 3 [Source:VGNC Symbol;Acc:VGNC:85218]	protein_coding	0.783952	0.545999	0.641913	0.682885	0.667927	0.35939	0.332734	0.413938	0.336228	0.493712	0.325632	0.29001	291	193	285	241	298	151	144	190	162	215	122	112
ENSSSCG00000000721	chr5	65812243	65870092	-	DYRK4	100524805	ENSSSCT00000000784;ENSSSCT00000043775	GO:0000166(nucleotide binding);GO:0004672(protein kinase activity);GO:0004674(protein serine/threonine kinase activity);GO:0004712(protein serine/threonine/tyrosine kinase activity);GO:0005524(ATP binding);GO:0005634(nucleus);GO:0005737(cytoplasm);GO:0005856(cytoskeleton);GO:0006468(protein phosphorylation);GO:0016301(kinase activity);GO:0016310(phosphorylation);GO:0016740(transferase activity);G…	NA	K18669	EC:2.7.12.1	NA	dual specificity tyrosine phosphorylation regulated kinase 4 [Source:VGNC Symbol;Acc:VGNC:97971]	protein_coding	0.203903	0.397615	0.0987715	0.539749	0.500591	0.140112	0.197832	0.268588	0.295781	0.383478	0.157773	0.0716594	58	106	34	144	169	45	65	95	108	126	45	21
ENSSSCG00000000722	chr5	65872539	65897212	-	RAD51AP1	100157339	ENSSSCT00000062312	GO:0000217(DNA secondary structure binding);GO:0000724(double-strand break repair via homologous recombination);GO:0000785(chromatin);GO:0003677(DNA binding);GO:0003690(double-stranded DNA binding);GO:0003697(single-stranded DNA binding);GO:0003723(RNA binding);GO:0005634(nucleus);GO:0006281(DNA repair);GO:0006974(cellular response to DNA damage stimulus);GO:0010569(regulation of double-strand br…	NA	NA	NA	NA	RAD51 associated protein 1 [Source:VGNC Symbol;Acc:VGNC:92057]	protein_coding	0.766995	1.61883	0.956905	1.73953	0.727576	1.07758	1.2807	1.78767	1.33706	0.917455	1.10169	1.66012	68	136	101	146	77	108	132	195	153	95	98	152
ENSSSCG00000000723	chr5	65897537	65944179	+	C12orf4		ENSSSCT00000092258;ENSSSCT00000000786	NA	NA	NA	NA	NA	chromosome 5 C12orf4 homolog [Source:VGNC Symbol;Acc:VGNC:86041]	protein_coding	3.99294	4.55384	3.63064	3.86934	3.76962	4.66619	3.64656	3.82906	4.87081	3.8004	4.24067	4.06628	1305	1418	1420	1204	1481	1727	1392	1550	2060	1459	1403	1380
ENSSSCG00000000728	chr5	66443548	66483626	+	PARP11	100524437	ENSSSCT00000102847;ENSSSCT00000000791;ENSSSCT00000036895;ENSSSCT00000032426	GO:0003950(NAD+ ADP-ribosyltransferase activity);GO:0005635(nuclear envelope);GO:0005654(nucleoplasm);GO:0005829(cytosol);GO:0006998(nuclear envelope organization);GO:0016604(nuclear body);GO:0016740(transferase activity);GO:0016757(glycosyltransferase activity);GO:0070213(protein auto-ADP-ribosylation);GO:0140289(protein mono-ADP-ribosylation);GO:1990404(NAD+-protein ADP-ribosyltransferase activ…	NA	K15259	EC:2.4.2.30	NA	poly(ADP-ribose) polymerase family member 11 [Source:VGNC Symbol;Acc:VGNC:103308]	protein_coding	4.03419	4.03564	2.46161	1.66744	1.97582	2.83332	2.11521	3.05614	2.15134	2.90634	3.35253	2.75871	935	891	682	369	551	745	573	878	646	792	787	665
ENSSSCG00000000730	chr5	66667899	66838922	-	PRMT8	100526051	ENSSSCT00000077366	GO:0005886(plasma membrane);GO:0006479(protein methylation);GO:0008168(methyltransferase activity);GO:0008469(histone-arginine N-methyltransferase activity);GO:0008757(S-adenosylmethionine-dependent methyltransferase activity);GO:0016274(protein-arginine N-methyltransferase activity);GO:0016571(histone methylation);GO:0016740(transferase activity);GO:0018216(peptidyl-arginine methylation);GO:0019…	NA	K11439	EC:2.1.1.319	NA	protein arginine methyltransferase 8 [Source:VGNC Symbol;Acc:VGNC:91825]	protein_coding	0.171725	0.0933393	0	0.147751	0	0.0756083	0.0610555	0.106234	0.0405751	0.0634361	0	0.126508	24	12	0	19	0	12	10	18	8	10	0	18
ENSSSCG00000000732	chr5	66533033	66647748	+	CRACR2A	100625935	ENSSSCT00000050127	GO:0002115(store-operated calcium entry);GO:0003924(GTPase activity);GO:0005509(calcium ion binding);GO:0005525(GTP binding);GO:0005737(cytoplasm);GO:0016020(membrane);GO:0032237(activation of store-operated calcium channel activity);GO:0046872(metal ion binding);GO:0051928(positive regulation of calcium ion transport)	NA	NA	NA	NA	calcium release activated channel regulator 2A [Source:VGNC Symbol;Acc:VGNC:86974]	protein_coding	0.469823	0.361651	0.381543	0.209972	0.174671	0.240517	0.271139	0.353998	0.140875	0.166946	0.282649	0.228704	99	73	96	42	45	58	67	93	39	42	61	50
ENSSSCG00000000734	chr5	66853404	66911569	+	TSPAN11	100514841	ENSSSCT00000000797;ENSSSCT00000038217	GO:0005887(integral component of plasma membrane);GO:0016020(membrane);GO:0016021(integral component of membrane);GO:0016477(cell migration);GO:0016477(cell migration)	NA	NA	NA	NA	tetraspanin 11 [Source:VGNC Symbol;Acc:VGNC:94500]	protein_coding	17.5117	15.0879	13.5658	13.866	12.6387	10.5649	22.0165	16.6105	12.1142	11.108	5.26094	11.286	2417	1985	2240	1822	2098	1653	3550	2841	2165	1802	735	1618
ENSSSCG00000000735	chr5	66913769	67106233	-	TSPAN9	768114	ENSSSCT00000063353;ENSSSCT00000000798	GO:0005886(plasma membrane);GO:0005887(integral component of plasma membrane);GO:0016020(membrane);GO:0016021(integral component of membrane);GO:0097197(tetraspanin-enriched microdomain);GO:0097197(tetraspanin-enriched microdomain)	NA	NA	NA	NA	tetraspanin 9 [Source:VGNC Symbol;Acc:VGNC:94516]	protein_coding	8.7494	9.66347	9.79864	10.2848	10.4197	13.2594	10.7606	10.0734	7.19724	12.7571	7.2514	7.21725	1819	1914	2437	2036	2605	3123	2613	2594	1938	3115	1526	1558
ENSSSCG00000000736	chr5	67118317	67193919	-	TEAD4	100152085	ENSSSCT00000000800;ENSSSCT00000000799;ENSSSCT00000064867	GO:0000978(RNA polymerase II cis-regulatory region sequence-specific DNA binding);GO:0000981(DNA-binding transcription factor activity, RNA polymerase II-specific);GO:0001228(DNA-binding transcription activator activity, RNA polymerase II-specific);GO:0001701(in utero embryonic development);GO:0001708(cell fate specification);GO:0001825(blastocyst formation);GO:0001830(trophectodermal cell fate c…	04390(Hippo signaling pathway);04392(Hippo signaling pathway - multiple species);04392(Hippo signaling pathway - multiple species)	NA	NA	TEA	TEA domain transcription factor 4 [Source:VGNC Symbol;Acc:VGNC:93856]	protein_coding	1.35875	1.6404	0.69431	1.39943	1.33163	1.31631	1.63296	1.23423	1.16256	1.34239	2.35186	0.869567	491	565	301	483	579	540	690	554	545	571	861	327
ENSSSCG00000000737	chr5	67199448	67238322	-	TULP3	100511196	ENSSSCT00000040316	GO:0001664(G protein-coupled receptor binding);GO:0001841(neural tube formation);GO:0001843(neural tube closure);GO:0005576(extracellular region);GO:0005634(nucleus);GO:0005654(nucleoplasm);GO:0005730(nucleolus);GO:0005886(plasma membrane);GO:0005929(cilium);GO:0005930(axoneme);GO:0007224(smoothened signaling pathway);GO:0007420(brain development);GO:0008277(regulation of G protein-coupled recept…	NA	NA	NA	Tub	TUB like protein 3 [Source:VGNC Symbol;Acc:VGNC:94591]	protein_coding	3.13022	2.42618	4.15631	4.24939	4.21168	2.75305	3.13006	3.16244	2.27703	3.24662	2.51766	2.28349	857	633	1361	1107	1386	854	1001	1072	807	1044	698	649
ENSSSCG00000000738	chr5	67239202	67246124	-	RHNO1	100511381	ENSSSCT00000043604	GO:0000077(DNA damage checkpoint signaling);GO:0000725(recombinational repair);GO:0005634(nucleus);GO:0005694(chromosome);GO:0034644(cellular response to UV);GO:0070318(positive regulation of G0 to G1 transition);GO:0071479(cellular response to ionizing radiation)	NA	NA	NA	NA	RAD9-HUS1-RAD1 interacting nuclear orphan 1 [Source:VGNC Symbol;Acc:VGNC:92282]	protein_coding	2.31327	3.1488	6.57057	1.17026	1.53378	1.79146	2.26178	4.03905	3.1502	3.49981	2.06175	1.49969	267	346	905	129	213	234	305	576	470	474	241	180
ENSSSCG00000000739	chr5	67245694	67263211	+	FOXM1	100511565	ENSSSCT00000053038;ENSSSCT00000029857	GO:0000086(G2/M transition of mitotic cell cycle);GO:0000122(negative regulation of transcription by RNA polymerase II);GO:0000977(RNA polymerase II transcription regulatory region sequence-specific DNA binding);GO:0003677(DNA binding);GO:0003700(DNA-binding transcription factor activity);GO:0005634(nucleus);GO:0006355(regulation of DNA-templated transcription);GO:0006978(DNA damage response, sig…	04218(Cellular senescence);04218(Cellular senescence)	NA	NA	Fork_head	forkhead box M1 [Source:VGNC Symbol;Acc:VGNC:88217]	protein_coding	0.302197	0.556681	0.637966	0.635752	0.485171	0.396504	0.531872	0.952786	0.787246	0.259332	0.411925	0.331828	52	90	130	103	99	76	107	201	173	52	71	59
ENSSSCG00000000740	chr5	67263117	67270949	+	TEX52		ENSSSCT00000000803	GO:0000977(RNA polymerase II transcription regulatory region sequence-specific DNA binding);GO:0003700(DNA-binding transcription factor activity);GO:0005634(nucleus);GO:0006357(regulation of transcription by RNA polymerase II);GO:0042127(regulation of cell population proliferation)	NA	NA	NA	NA	testis expressed 52 [Source:HGNC Symbol;Acc:HGNC:53643]	protein_coding	0	0	0	0	0	0	0.068637	0	0	0	0	0	0	0	0	0	0	0	10	0	0	0	0	0
ENSSSCG00000000741	chr5	67281107	67291522	+	NRIP2	100511992	ENSSSCT00000000805	GO:0000122(negative regulation of transcription by RNA polymerase II);GO:0004190(aspartic-type endopeptidase activity);GO:0005634(nucleus);GO:0005737(cytoplasm);GO:0006508(proteolysis);GO:0007219(Notch signaling pathway)	NA	NA	NA	NA	nuclear receptor interacting protein 2 [Source:VGNC Symbol;Acc:VGNC:90897]	protein_coding	4.90095	5.61679	2.97846	3.85078	3.72774	2.96808	3.64478	4.50255	2.93609	3.91963	4.78179	2.86543	577	630	420	432	528	396	501	657	448	542	570	350
ENSSSCG00000000742	chr5	67291772	67305607	-	ITFG2	100512166	ENSSSCT00000000806	GO:0002314(germinal center B cell differentiation);GO:0005654(nucleoplasm);GO:0005765(lysosomal membrane);GO:0005829(cytosol);GO:0032006(regulation of TOR signaling);GO:0034198(cellular response to amino acid starvation);GO:0042149(cellular response to glucose starvation);GO:0140007(KICSTOR complex);GO:1904262(negative regulation of TORC1 signaling)	NA	NA	NA	NA	integrin alpha FG-GAP repeat containing 2 [Source:VGNC Symbol;Acc:VGNC:89230]	protein_coding	3.76396	4.00086	3.557	3.75327	2.81719	4.30391	3.7863	4.01133	4.36388	4.50655	4.03714	3.37859	638	646	721	606	575	827	750	843	958	897	693	595
ENSSSCG00000000743	chr5	67313480	67322028	-	FKBP4	100337672	ENSSSCT00000085969	GO:0000413(protein peptidyl-prolyl isomerization);GO:0003755(peptidyl-prolyl cis-trans isomerase activity);GO:0005528(FK506 binding);GO:0005654(nucleoplasm);GO:0005737(cytoplasm);GO:0005829(cytosol);GO:0016853(isomerase activity);GO:0031072(heat shock protein binding);GO:0061077(chaperone-mediated protein folding)	04915(Estrogen signaling pathway)	K09571	EC:5.2.1.8	NA	FKBP prolyl isomerase 4 [Source:VGNC Symbol;Acc:VGNC:88147]	protein_coding	66.6455	60.5137	45.716	25.8857	34.8033	65.8121	77.3025	84.7604	86.5753	55.3068	105.205	64.8837	7408	6410	6080	2740	4653	8288	10039	11673	12459	7222	11839	7487
ENSSSCG00000000744	chr5	67323738	67324361	-	ENSSSCG00000000744		ENSSSCT00000000808	NA	NA	NA	NA	NA		protein_coding	0	0	0	0.113474	0	0	0	0	0	0	0	0	0	0	0	4	0	0	0	0	0	0	0	0
ENSSSCG00000000745	chr5	67364877	67395730	+	DDX11	100515028	ENSSSCT00000000809	GO:0000166(nucleotide binding);GO:0000785(chromatin);GO:0000922(spindle pole);GO:0003676(nucleic acid binding);GO:0003677(DNA binding);GO:0003678(DNA helicase activity);GO:0003682(chromatin binding);GO:0003688(DNA replication origin binding);GO:0003690(double-stranded DNA binding);GO:0003697(single-stranded DNA binding);GO:0003727(single-stranded RNA binding);GO:0004386(helicase activity);GO:0005…	NA	K11273	EC:3.6.4.13	NA	DEAD/H-box helicase 11 [Source:HGNC Symbol;Acc:HGNC:2736]	protein_coding	1.98855	2.03925	2.08735	0.854308	1.12839	1.32603	1.85659	1.70739	2.62252	1.85677	1.62364	1.75585	373	364	468	153	255	282	407	397	636	409	308	342
ENSSSCG00000000746	chr5	67394875	67412404	-	WASHC1	100512536	ENSSSCT00000087395;ENSSSCT00000000810;ENSSSCT00000039963	GO:0003779(actin binding);GO:0005769(early endosome);GO:0005829(cytosol);GO:0006887(exocytosis);GO:0010008(endosome membrane);GO:0031901(early endosome membrane);GO:0032456(endocytic recycling);GO:0034314(Arp2/3 complex-mediated actin nucleation);GO:0042147(retrograde transport, endosome to Golgi);GO:0043014(alpha-tubulin binding);GO:0043015(gamma-tubulin binding);GO:0055037(recycling endosome);G…	04144(Endocytosis);04144(Endocytosis)	NA	NA	NA	WASH complex subunit 1 [Source:NCBI gene (formerly Entrezgene);Acc:100512536]	protein_coding	8.44964	8.82295	7.52672	9.33516	10.1428	8.76361	8.37342	7.44412	6.48843	10.0508	6.74143	8.422	1111	1105	1184	1169	1604	1305	1287	1212	1104	1552	898	1150
ENSSSCG00000000748	chr5	67445838	67540485	+	IQSEC3	100515547	ENSSSCT00000085918	GO:0005085(guanyl-nucleotide exchange factor activity);GO:0005654(nucleoplasm);GO:0005829(cytosol);GO:0030036(actin cytoskeleton organization);GO:0032012(regulation of ARF protein signal transduction);GO:0050790(regulation of catalytic activity)	04144(Endocytosis)	NA	NA	NA	IQ motif and Sec7 domain ArfGEF 3 [Source:VGNC Symbol;Acc:VGNC:89196]	protein_coding	0.003898	0	0.030367	0	0	0	0	0	0	0	0	0	2	0	17	0	0	0	0	0	0	0	0	0
ENSSSCG00000000749	chr5	67550289	67572588	-	SLC6A12	100512716	ENSSSCT00000057522	GO:0005332(gamma-aminobutyric acid:sodium:chloride symporter activity);GO:0005887(integral component of plasma membrane);GO:0006836(neurotransmitter transport);GO:0008028(monocarboxylic acid transmembrane transporter activity);GO:0015293(symporter activity);GO:0015718(monocarboxylic acid transport);GO:0015812(gamma-aminobutyric acid transport);GO:0016020(membrane);GO:0016021(integral component of…	04721(Synaptic vesicle cycle);04727(GABAergic synapse)	NA	NA	NA	solute carrier family 6 member 12 [Source:VGNC Symbol;Acc:VGNC:93155]	protein_coding	0.043679	0.053686	0.13389	0.08073	0.060548	0.044092	0	0.016099	0.155072	0.049479	0.099788	0.049364	7	8	25	12	12	8	0	4	32	10	16	8
ENSSSCG00000000751	chr5	67725834	67760049	+	CCDC77	100513353	ENSSSCT00000000815	GO:0005813(centrosome)	NA	NA	NA	NA	coiled-coil domain containing 77 [Source:VGNC Symbol;Acc:VGNC:86313]	protein_coding	1.03845	1.07293	1.09222	0.985417	1.23264	0.864539	0.565694	0.980019	0.703366	0.771345	0.583196	0.471237	295	290	370	266	420	278	188	344	258	257	168	139
ENSSSCG00000000753	chr5	68000905	68140755	+	WNK1	406235	ENSSSCT00000038423	GO:0003084(positive regulation of systemic arterial blood pressure);GO:0004672(protein kinase activity);GO:0004674(protein serine/threonine kinase activity);GO:0005524(ATP binding);GO:0005737(cytoplasm);GO:0005829(cytosol);GO:0006468(protein phosphorylation);GO:0006811(ion transport);GO:0007165(signal transduction);GO:0008217(regulation of blood pressure);GO:0010820(positive regulation of T cell …	NA	K08867	EC:2.7.11.1	NA	WNK lysine deficient protein kinase 1 [Source:VGNC Symbol;Acc:VGNC:94962]	protein_coding	11.7473	10.1383	10.434	8.91377	9.55191	12.6177	11.7873	9.68028	8.93582	10.0042	8.99315	8.39359	4521	3718	4804	3266	4421	5501	5300	4616	4452	4523	3504	3353
ENSSSCG00000000754	chr5	68143646	68169670	-	RAD52	100141308	ENSSSCT00000042724;ENSSSCT00000000818	GO:0000724(double-strand break repair via homologous recombination);GO:0000730(DNA recombinase assembly);GO:0003677(DNA binding);GO:0003697(single-stranded DNA binding);GO:0005634(nucleus);GO:0006281(DNA repair);GO:0006310(DNA recombination);GO:0006312(mitotic recombination);GO:0006974(cellular response to DNA damage stimulus);GO:0010792(DNA double-strand break processing involved in repair via s…	03440(Homologous recombination);03440(Homologous recombination)	NA	NA	NA	RAD52 homolog, DNA repair protein [Source:VGNC Symbol;Acc:VGNC:92060]	protein_coding	4.78205	4.43637	3.77655	4.05492	3.25998	3.65752	4.22612	3.26957	3.64046	4.20824	4.9591	5.36759	570	504	538	460	468	494	588	483	562	589	598	664
ENSSSCG00000000755	chr5	68223729	68608703	+	ERC1	100513988	ENSSSCT00000000819;ENSSSCT00000039249;ENSSSCT00000048015;ENSSSCT00000077045;ENSSSCT00000068467	GO:0005737(cytoplasm);GO:0005813(centrosome);GO:0006355(regulation of DNA-templated transcription);GO:0007252(I-kappaB phosphorylation);GO:0007274(neuromuscular synaptic transmission);GO:0008385(IkappaB kinase complex);GO:0016020(membrane);GO:0036064(ciliary basal body);GO:0048167(regulation of synaptic plasticity);GO:0048788(cytoskeleton of presynaptic active zone);GO:0048790(maintenance of pres…	04064(NF-kappa B signaling pathway);04064(NF-kappa B signaling pathway)	NA	NA	NA	ELKS/RAB6-interacting/CAST family member 1 [Source:VGNC Symbol;Acc:VGNC:87761]	protein_coding	2.21936	1.88607	2.67906	2.08492	2.24026	3.13759	2.68446	2.66941	2.06097	2.27108	2.20552	2.22239	1440	1165	2077	1286	1747	2303	2032	2143	1730	1729	1448	1497
ENSSSCG00000000757	chr5	68755811	68807235	+	ADIPOR2	404694	ENSSSCT00000000821	GO:0005886(plasma membrane);GO:0016020(membrane);GO:0016021(integral component of membrane);GO:0031226(intrinsic component of plasma membrane);GO:0033211(adiponectin-activated signaling pathway);GO:0038023(signaling receptor activity);GO:0042593(glucose homeostasis);GO:0042802(identical protein binding);GO:0055100(adiponectin binding);GO:0061042(vascular wound healing);GO:0097003(adipokinetic hor…	04152(AMPK signaling pathway);04211(Longevity regulating pathway);04920(Adipocytokine signaling pathway);04932(Non-alcoholic fatty liver disease)	NA	NA	NA	adiponectin receptor 2 [Source:VGNC Symbol;Acc:VGNC:85141]	protein_coding	455.668	451.594	357.33	423.523	420.04	471.319	483.688	566.176	568.951	491.718	517.341	502.534	85249	80511	79981	75445	94521	99903	105729	131244	137809	108067	97991	97601
ENSSSCG00000000759	chr5	68627185	68732265	+	WNT5B	100516268	ENSSSCT00000000823;ENSSSCT00000057105;ENSSSCT00000094237	GO:0002062(chondrocyte differentiation);GO:0005102(signaling receptor binding);GO:0005109(frizzled binding);GO:0005125(cytokine activity);GO:0005576(extracellular region);GO:0005615(extracellular space);GO:0016055(Wnt signaling pathway);GO:0030182(neuron differentiation);GO:0030335(positive regulation of cell migration);GO:0045165(cell fate commitment);GO:0060070(canonical Wnt signaling pathway);…	04150(mTOR signaling pathway);04310(Wnt signaling pathway);04360(Axon guidance);04390(Hippo signaling pathway);04550(Signaling pathways regulating pluripotency of stem cells);04916(Melanogenesis);04934(Cushing syndrome);05010(Alzheimer disease);05022(Pathways of neurodegeneration - multiple diseases);05165(Human papillomavirus infection);05200(Pathways in cancer);05205(Proteoglycans in cancer);05…	NA	NA	NA	Wnt family member 5B [Source:HGNC Symbol;Acc:HGNC:16265]	protein_coding	14.1791	16.5412	4.54679	8.34117	8.40578	7.30571	9.98217	8.53838	10.0603	8.84297	7.99678	10.341	2446	2720	939	1370	1745	1429	2013	1826	2247	1793	1398	1853
ENSSSCG00000000760	chr5	68822539	68836514	+	LRTM2	100514647	ENSSSCT00000000824	GO:0007411(axon guidance);GO:0008201(heparin binding);GO:0016020(membrane);GO:0016021(integral component of membrane);GO:0048495(Roundabout binding);GO:0050919(negative chemotaxis);GO:0051965(positive regulation of synapse assembly)	NA	NA	NA	NA	leucine rich repeats and transmembrane domains 2 [Source:VGNC Symbol;Acc:VGNC:89866]	protein_coding	0.033379	0.126552	0.0414	0.120914	0.059772	0	0	0.039707	0.090077	0	0.121569	0.125822	6	20	8	19	12	0	0	8	19	0	20	22
ENSSSCG00000000764	chr5	69500285	69512611	-	HDHD5	102160309	ENSSSCT00000000828	GO:0005739(mitochondrion);GO:0046474(glycerophospholipid biosynthetic process)	NA	NA	NA	NA	haloacid dehalogenase like hydrolase domain containing 5 [Source:VGNC Symbol;Acc:VGNC:88823]	protein_coding	9.51237	8.58062	9.79234	7.46367	8.17819	9.72687	10.1305	10.3376	11.8686	11.064	10.3007	10.5176	594	511	732	444	614	688	739	800	959	812	651	682
ENSSSCG00000000765	chr5	69461290	69480112	+	IL17RA	100518910	ENSSSCT00000033369;ENSSSCT00000091210	GO:0005886(plasma membrane);GO:0009615(response to virus);GO:0016020(membrane);GO:0016021(integral component of membrane);GO:0019221(cytokine-mediated signaling pathway);GO:0030368(interleukin-17 receptor activity);GO:0032747(positive regulation of interleukin-23 production);GO:0032755(positive regulation of interleukin-6 production);GO:0050729(positive regulation of inflammatory response);GO:007…	04060(Cytokine-cytokine receptor interaction);04657(IL-17 signaling pathway);04657(IL-17 signaling pathway)	NA	NA	NA	interleukin 17 receptor A [Source:VGNC Symbol;Acc:VGNC:89085]	protein_coding	24.8434	26.1545	29.2042	30.5549	29.3563	20.035	30.0163	27.2865	24.3775	27.2947	21.0958	22.0731	3318	3329	4667	3886	4716	3032	4684	4515	4216	4283	2853	3060
ENSSSCG00000000766	chr5	69621959	69740958	+	CECR2	100737051	ENSSSCT00000098837;ENSSSCT00000050475;ENSSSCT00000054850	GO:0000791(euchromatin);GO:0001842(neural fold formation);GO:0001843(neural tube closure);GO:0005634(nucleus);GO:0006338(chromatin remodeling);GO:0007338(single fertilization);GO:0021915(neural tube development);GO:0031010(ISWI-type complex);GO:0060122(inner ear receptor cell stereocilium organization);GO:0090102(cochlea development);GO:0090537(CERF complex);GO:0097194(execution phase of apoptosi…	NA	NA	NA	NA	CECR2 histone acetyl-lysine reader [Source:VGNC Symbol;Acc:VGNC:96576]	protein_coding	5.08778	6.23447	4.92265	7.21495	6.22095	2.84524	5.0822	6.46145	5.36285	4.8704	5.4473	4.09173	1126	1315	1304	1520	1656	714	1315	1771	1537	1267	1221	941
ENSSSCG00000000769	chr5	69849002	69875853	-	BID	594852	ENSSSCT00000074340;ENSSSCT00000083848;ENSSSCT00000040990;ENSSSCT00000000833	GO:0001836(release of cytochrome c from mitochondria);GO:0005737(cytoplasm);GO:0005739(mitochondrion);GO:0005741(mitochondrial outer membrane);GO:0005829(cytosol);GO:0006626(protein targeting to mitochondrion);GO:0006915(apoptotic process);GO:0006919(activation of cysteine-type endopeptidase activity involved in apoptotic process);GO:0008637(apoptotic mitochondrial changes);GO:0010918(positive re…	01524(Platinum drug resistance);04071(Sphingolipid signaling pathway);04115(p53 signaling pathway);04210(Apoptosis);04215(Apoptosis - multiple species);04217(Necroptosis);04650(Natural killer cell mediated cytotoxicity);04932(Non-alcoholic fatty liver disease);05010(Alzheimer disease);05014(Amyotrophic lateral sclerosis);05022(Pathways of neurodegeneration - multiple diseases);05152(Tuberculosis)…	NA	NA	NA	BH3 interacting domain death agonist [Source:VGNC Symbol;Acc:VGNC:85824]	protein_coding	3.01993	3.0064	2.45169	4.98742	4.35834	2.30903	3.14226	3.38692	3.17948	3.41285	2.56468	3.21184	1366	1295	1326	2146	2369	1182	1660	1897	1861	1813	1174	1508
ENSSSCG00000000770	chr5	69887892	70059472	-	MICAL3	100157721	ENSSSCT00000036844;ENSSSCT00000054818;ENSSSCT00000000834;ENSSSCT00000081996;ENSSSCT00000088531	GO:0003779(actin binding);GO:0004497(monooxygenase activity);GO:0005634(nucleus);GO:0005654(nucleoplasm);GO:0005737(cytoplasm);GO:0005829(cytosol);GO:0005856(cytoskeleton);GO:0005886(plasma membrane);GO:0006887(exocytosis);GO:0007010(cytoskeleton organization);GO:0016709(oxidoreductase activity, acting on paired donors, with incorporation or reduction of molecular oxygen, NAD(P)H as one donor, an…	NA	K19947	EC:1.14.13.225	NA	microtubule associated monooxygenase, calponin and LIM domain containing 3 [Source:VGNC Symbol;Acc:VGNC:90208]	protein_coding	5.93824	6.28965	4.64373	7.37388	6.97973	4.37623	4.85692	5.48626	4.60468	5.84932	4.8661	3.92506	3553	3585	3324	4199	5022	2967	3395	4067	3567	4111	2948	2437
ENSSSCG00000000774	chr5	70183308	70229572	+	USP18	396777	ENSSSCT00000065704	GO:0004843(cysteine-type deubiquitinase activity);GO:0005634(nucleus);GO:0005829(cytosol);GO:0006511(ubiquitin-dependent protein catabolic process);GO:0016579(protein deubiquitination);GO:0016787(hydrolase activity);GO:0043231(intracellular membrane-bounded organelle);GO:0050727(regulation of inflammatory response);GO:0060339(negative regulation of type I interferon-mediated signaling pathway)	NA	K11846	EC:3.4.19.12	NA	ubiquitin specific peptidase 18 [Source:NCBI gene (formerly Entrezgene);Acc:396777]	protein_coding	11.9578	22.2053	5.08117	6.79593	6.23808	3.86957	6.64907	7.32948	10.27	7.04505	4.44292	13.3939	1862	3294	947	1008	1168	683	1210	1414	2070	1289	701	2165
ENSSSCG00000000778	chr5	70394578	70660195	-	CPNE8	100519777	ENSSSCT00000028240;ENSSSCT00000082469	GO:0005544(calcium-dependent phospholipid binding);GO:0005886(plasma membrane);GO:0071277(cellular response to calcium ion);GO:0071277(cellular response to calcium ion)	NA	NA	NA	NA	copine 8 [Source:VGNC Symbol;Acc:VGNC:86955]	protein_coding	3.83377	4.05576	4.50823	3.4591	3.34561	3.33253	3.3489	4.49419	3.64871	3.25985	3.0768	3.65957	1383	1394	1946	1188	1452	1361	1411	2009	1703	1382	1123	1370
ENSSSCG00000000779	chr5	70889000	71029809	-	KIF21A	100520674	ENSSSCT00000053315;ENSSSCT00000071566;ENSSSCT00000083953;ENSSSCT00000000843;ENSSSCT00000086842	GO:0000166(nucleotide binding);GO:0003777(microtubule motor activity);GO:0005524(ATP binding);GO:0005829(cytosol);GO:0005856(cytoskeleton);GO:0005871(kinesin complex);GO:0005874(microtubule);GO:0005886(plasma membrane);GO:0007018(microtubule-based movement);GO:0008017(microtubule binding);GO:0016887(ATP hydrolysis activity);GO:0030424(axon);GO:0071532(ankyrin repeat binding);GO:0071532(ankyrin re…	NA	NA	NA	NA	kinesin family member 21A [Source:VGNC Symbol;Acc:VGNC:89464]	protein_coding	1.00703	1.2969	1.56158	1.26264	1.27373	1.03445	1.7886	1.75097	1.43114	1.63064	1.8638	1.45364	345	422	638	411	523	401	715	741	632	654	644	515
ENSSSCG00000000781	chr5	71122325	71180723	-	ABCD2	100520309	ENSSSCT00000000845	GO:0000038(very long-chain fatty acid metabolic process);GO:0000166(nucleotide binding);GO:0005324(long-chain fatty acid transporter activity);GO:0005524(ATP binding);GO:0005777(peroxisome);GO:0005778(peroxisomal membrane);GO:0006635(fatty acid beta-oxidation);GO:0007031(peroxisome organization);GO:0009617(response to bacterium);GO:0015910(long-chain fatty acid import into peroxisome);GO:0016020(…	02010(ABC transporters);04146(Peroxisome)	NA	NA	NA	ATP binding cassette subfamily D member 2 [Source:VGNC Symbol;Acc:VGNC:84962]	protein_coding	5.20269	4.09152	8.43353	9.15262	7.46066	3.68441	3.7263	8.52425	4.02897	7.1291	3.593	4.88271	1214	910	2354	2033	2094	974	1016	2464	1217	1954	849	1183
ENSSSCG00000000782	chr5	71185592	71270728	+	C12orf40		ENSSSCT00000069177	NA	NA	NA	NA	NA	chromosome 12 open reading frame 40 [Source:HGNC Symbol;Acc:HGNC:26846]	protein_coding	0	0	0	0	0	0	0.009705	0.056023	0	0	0	0	0	0	0	0	0	0	2	7	0	0	0	0
ENSSSCG00000000783	chr5	71295008	71673785	-	SLC2A13	106504075	ENSSSCT00000000848	GO:0002020(protease binding);GO:0005366(myo-inositol:proton symporter activity);GO:0005886(plasma membrane);GO:0005887(integral component of plasma membrane);GO:0015798(myo-inositol transport);GO:0016020(membrane);GO:0016021(integral component of membrane);GO:0022857(transmembrane transporter activity);GO:0031090(organelle membrane);GO:0042995(cell projection);GO:0044297(cell body);GO:0051117(ATP…	NA	NA	NA	NA	solute carrier family 2 member 13 [Source:VGNC Symbol;Acc:VGNC:93047]	protein_coding	2.73207	3.5467	2.03471	1.74384	1.84382	1.97058	2.20024	2.19705	1.98344	2.44657	2.98752	2.38145	924	1143	823	562	750	755	869	921	868	972	1023	836
ENSSSCG00000000784	chr5	71800225	71945828	+	LRRK2	780403	ENSSSCT00000102525;ENSSSCT00000000849	GO:0000149(SNARE binding);GO:0000165(MAPK cascade);GO:0000166(nucleotide binding);GO:0000287(magnesium ion binding);GO:0001933(negative regulation of protein phosphorylation);GO:0001934(positive regulation of protein phosphorylation);GO:0003779(actin binding);GO:0003924(GTPase activity);GO:0004672(protein kinase activity);GO:0004674(protein serine/threonine kinase activity);GO:0004706(JUN kinase …	05012(Parkinson disease);05022(Pathways of neurodegeneration - multiple diseases);05022(Pathways of neurodegeneration - multiple diseases)	K08844	EC:2.7.11.1	NA	leucine rich repeat kinase 2 [Source:VGNC Symbol;Acc:VGNC:98094]	protein_coding	4.44579	4.25716	5.29467	7.1708	6.30957	4.70589	4.0876	3.84745	4.7532	4.31256	4.98869	2.50171	2011	1834	2865	3087	3431	2411	2160	2156	2783	2291	2285	1175
ENSSSCG00000000789	chr5	72168511	72495633	+	CNTN1	100521555	ENSSSCT00000048567	GO:0005886(plasma membrane);GO:0007399(nervous system development);GO:0007411(axon guidance);GO:0007420(brain development);GO:0007626(locomotory behavior);GO:0010467(gene expression);GO:0010628(positive regulation of gene expression);GO:0010765(positive regulation of sodium ion transport);GO:0010976(positive regulation of neuron projection development);GO:0016020(membrane);GO:0016021(integral com…	04514(Cell adhesion molecules)	NA	NA	NA	contactin 1 [Source:VGNC Symbol;Acc:VGNC:86848]	protein_coding	0.54214	0.2421	0.436393	0.0836875	0.160074	0.144116	0.279275	0.657775	0.669903	0.337571	0.0427229	0.527215	167	71	161	25	60	51	101	250	267	122	14	168
ENSSSCG00000000791	chr5	72574302	72940818	+	PDZRN4	100156795	ENSSSCT00000070899	GO:0046872(metal ion binding)	NA	K15682	EC:2.3.2.27	NA	PDZ domain containing ring finger 4 [Source:VGNC Symbol;Acc:VGNC:91299]	protein_coding	0.340789	0.0469228	0	0.0641115	0.119167	0.0600299	0.0545149	0.0494746	0.0526977	0.0216882	0.0124556	0.0837981	107	14	0	20	45	22	20	20	22	8	4	28
ENSSSCG00000000793	chr5	73498730	73696397	+	PPHLN1	100522617	ENSSSCT00000056241;ENSSSCT00000065723;ENSSSCT00000063623;ENSSSCT00000056187;ENSSSCT00000000859;ENSSSCT00000064602	GO:0005654(nucleoplasm);GO:0005794(Golgi apparatus);GO:0005829(cytosol);GO:0045814(negative regulation of gene expression, epigenetic);GO:0045892(negative regulation of DNA-templated transcription);GO:0090309(positive regulation of DNA methylation-dependent heterochromatin formation);GO:0097355(protein localization to heterochromatin);GO:0097355(protein localization to heterochromatin)	NA	NA	NA	NA	periphilin 1 [Source:VGNC Symbol;Acc:VGNC:91697]	protein_coding	14.1053	14.5713	15.7411	15.5221	13.5333	13.583	11.946	14.1485	13.7919	13.1887	15.9435	13.8701	2783	2740	3716	2917	3212	3037	2755	3459	3523	3056	3185	2843
ENSSSCG00000000795	chr5	74503116	74672733	-	ADAMTS20	100049661	ENSSSCT00000000862;ENSSSCT00000063436	GO:0004175(endopeptidase activity);GO:0004222(metalloendopeptidase activity);GO:0005576(extracellular region);GO:0005615(extracellular space);GO:0006508(proteolysis);GO:0006915(apoptotic process);GO:0007165(signal transduction);GO:0007229(integrin-mediated signaling pathway);GO:0008233(peptidase activity);GO:0008237(metallopeptidase activity);GO:0008270(zinc ion binding);GO:0009967(positive regul…	NA	NA	NA	NA	ADAM metallopeptidase with thrombospondin type 1 motif 20 [Source:VGNC Symbol;Acc:VGNC:85082]	protein_coding	1.26387	0.814945	0.574806	0.795339	0.741	0.796122	1.83133	1.88824	2.60703	0.930499	0.737252	1.19261	477	294	259	286	337	341	807	882	1272	412	282	467
ENSSSCG00000000798	chr5	74868585	74881217	-	TWF1	100523377	ENSSSCT00000100106;ENSSSCT00000083369;ENSSSCT00000071068;ENSSSCT00000045088;ENSSSCT00000000865;ENSSSCT00000101653;ENSSSCT00000105277;ENSSSCT00000038078	GO:0003779(actin binding);GO:0003785(actin monomer binding);GO:0004713(protein tyrosine kinase activity);GO:0005524(ATP binding);GO:0005546(phosphatidylinositol-4,5-bisphosphate binding);GO:0005737(cytoplasm);GO:0005829(cytosol);GO:0005856(cytoskeleton);GO:0005884(actin filament);GO:0005911(cell-cell junction);GO:0010591(regulation of lamellipodium assembly);GO:0010613(positive regulation of card…	NA	NA	NA	NA	twinfilin actin binding protein 1 [Source:VGNC Symbol;Acc:VGNC:94595]	protein_coding	18.4841	19.6444	19.8111	20.351	20.2207	20.9927	23.5216	25.9465	19.7556	15.1924	24.357	23.9875	2959	2994	3791	3101	3891	3803	4395	5142	4091	2855	3943	3982
ENSSSCG00000000799	chr5	74834600	74859344	+	IRAK4	100127166	ENSSSCT00000076729;ENSSSCT00000000866	GO:0000166(nucleotide binding);GO:0000287(magnesium ion binding);GO:0002446(neutrophil mediated immunity);GO:0004672(protein kinase activity);GO:0004674(protein serine/threonine kinase activity);GO:0005149(interleukin-1 receptor binding);GO:0005524(ATP binding);GO:0005634(nucleus);GO:0005737(cytoplasm);GO:0005886(plasma membrane);GO:0006468(protein phosphorylation);GO:0007165(signal transduction)…	04010(MAPK signaling pathway);04064(NF-kappa B signaling pathway);04620(Toll-like receptor signaling pathway);04621(NOD-like receptor signaling pathway);04722(Neurotrophin signaling pathway);05132(Salmonella infection);05133(Pertussis);05135(Yersinia infection);05140(Leishmaniasis);05142(Chagas disease);05145(Toxoplasmosis);05152(Tuberculosis);05161(Hepatitis B);05162(Measles);05164(Influenza A);…	K04733	EC:2.7.11.1	NA	interleukin 1 receptor associated kinase 4 [Source:VGNC Symbol;Acc:VGNC:89202]	protein_coding	8.53532	8.78999	8.03771	8.04995	7.67373	7.04008	9.6767	7.1374	9.29684	7.522	7.7815	7.89226	1260	1237	1420	1132	1362	1177	1669	1305	1776	1304	1163	1209
ENSSSCG00000000800	chr5	74806152	74834428	-	PUS7L	100155187	ENSSSCT00000065568	GO:0001522(pseudouridine synthesis);GO:0003723(RNA binding);GO:0005634(nucleus);GO:0009451(RNA modification);GO:0009982(pseudouridine synthase activity);GO:0016853(isomerase activity);GO:1990481(mRNA pseudouridine synthesis)	NA	K06176	EC:5.4.99.27	NA	pseudouridine synthase 7 like [Source:VGNC Symbol;Acc:VGNC:92006]	protein_coding	4.2435	3.97956	3.75633	4.52566	4.29888	4.43	5.67833	3.30623	4.37252	3.58123	4.43334	3.84835	442	395	468	448	538	522	690	426	589	438	467	416
ENSSSCG00000000801	chr5	74917463	75406367	+	TMEM117	100524623	ENSSSCT00000000868;ENSSSCT00000037269	GO:0005783(endoplasmic reticulum);GO:0005886(plasma membrane);GO:0016020(membrane);GO:0016021(integral component of membrane);GO:0070059(intrinsic apoptotic signaling pathway in response to endoplasmic reticulum stress);GO:0070059(intrinsic apoptotic signaling pathway in response to endoplasmic reticulum stress)	NA	NA	NA	NA	transmembrane protein 117 [Source:VGNC Symbol;Acc:VGNC:94070]	protein_coding	1.0446	0.997817	1.06466	1.22066	1.49183	0.741377	2.32936	1.06394	1.10018	1.09185	1.23355	1.10836	281	256	342	312	481	225	729	353	382	344	335	308
ENSSSCG00000000802	chr5	75505099	75893454	-	NELL2	100525817	ENSSSCT00000068987;ENSSSCT00000045629	GO:0005080(protein kinase C binding);GO:0005509(calcium ion binding);GO:0005737(cytoplasm);GO:0008201(heparin binding);GO:0016020(membrane);GO:0016021(integral component of membrane);GO:0110165(cellular anatomical entity);GO:0110165(cellular anatomical entity)	NA	NA	NA	NA	neural EGFL like 2 [Source:VGNC Symbol;Acc:VGNC:90684]	protein_coding	0.116962	0.235249	0	0.337805	0.308797	0.192703	0.329991	0.210314	0.17939	0.0672068	0.401242	0.123531	23	43	0	62	72	42	75	51	45	16	78	25
ENSSSCG00000000804	chr5	76113236	76337069	+	ANO6	100155593	ENSSSCT00000045644;ENSSSCT00000000873;ENSSSCT00000105509;ENSSSCT00000084586;ENSSSCT00000077680	GO:0002407(dendritic cell chemotaxis);GO:0002543(activation of blood coagulation via clotting cascade);GO:0005227(calcium activated cation channel activity);GO:0005229(intracellular calcium activated chloride channel activity);GO:0005247(voltage-gated chloride channel activity);GO:0005254(chloride channel activity);GO:0005829(cytosol);GO:0005886(plasma membrane);GO:0006812(cation transport);GO:00…	NA	NA	NA	NA	anoctamin 6 [Source:VGNC Symbol;Acc:VGNC:85359]	protein_coding	14.8348	13.5505	13.3899	14.0094	15.2706	21.4475	15.1715	15.516	11.097	11.8403	11.3349	12.1101	4671	4066	5045	4201	5783	7650	5580	6054	4524	4380	3615	3959
ENSSSCG00000000806	chr5	76809514	76848660	-	SCAF11	100525109	ENSSSCT00000000875;ENSSSCT00000045668	GO:0000245(spliceosomal complex assembly);GO:0000375(RNA splicing, via transesterification reactions);GO:0005654(nucleoplasm);GO:0005730(nucleolus);GO:0008380(RNA splicing);GO:0016604(nuclear body);GO:0046872(metal ion binding);GO:0046872(metal ion binding)	NA	NA	NA	NA	SR-related CTD associated factor 11 [Source:VGNC Symbol;Acc:VGNC:92602]	protein_coding	15.2144	16.7223	12.7509	14.0251	13.4961	12.8867	13.8206	13.1814	13.2725	14.6105	12.4004	13.8393	4648	4868	4661	4080	4960	4461	4933	4990	5251	5243	3836	4390
ENSSSCG00000000807	chr5	77009862	77058427	-	SLC38A1	100154364	ENSSSCT00000000876	GO:0005886(plasma membrane);GO:0006868(glutamine transport);GO:0015186(L-glutamine transmembrane transporter activity);GO:0016020(membrane);GO:0016323(basolateral plasma membrane);GO:0030424(axon)	04724(Glutamatergic synapse);04727(GABAergic synapse)	NA	NA	NA	solute carrier family 38 member 1 [Source:HGNC Symbol;Acc:HGNC:13447]	protein_coding	0.625392	0.633944	0.467928	0.291535	0.360482	0.774394	0.806627	0.631102	0.585779	0.379237	0.437527	0.244223	103	99	92	46	71	144	155	128	124	73	73	42
ENSSSCG00000000808	chr5	77113494	77127650	-	SLC38A2	100525644	ENSSSCT00000000877	GO:0003333(amino acid transmembrane transport);GO:0005295(neutral amino acid:sodium symporter activity);GO:0005737(cytoplasm);GO:0005886(plasma membrane);GO:0006865(amino acid transport);GO:0006868(glutamine transport);GO:0010628(positive regulation of gene expression);GO:0015171(amino acid transmembrane transporter activity);GO:0015186(L-glutamine transmembrane transporter activity);GO:0015804(n…	04724(Glutamatergic synapse);04727(GABAergic synapse);04974(Protein digestion and absorption)	NA	NA	NA	solute carrier family 38 member 2 [Source:VGNC Symbol;Acc:VGNC:93094]	protein_coding	46.2731	38.7116	44.7403	31.5853	32.3266	32.7392	29.2707	35.6095	33.5557	44.6841	29.7809	38.5927	10333	8238	11953	6716	8683	8283	7637	9853	9701	11721	6733	8946
ENSSSCG00000000810	chr5	77642195	77645753	-	AMIGO2	100152349	ENSSSCT00000000879	GO:0007155(cell adhesion);GO:0007420(brain development);GO:0016020(membrane);GO:0016021(integral component of membrane);GO:0043066(negative regulation of apoptotic process);GO:0051965(positive regulation of synapse assembly)	NA	NA	NA	NA	adhesion molecule with Ig like domain 2 [Source:VGNC Symbol;Acc:VGNC:85281]	protein_coding	10.0411	12.2098	9.31745	9.28662	8.45333	9.88246	5.6448	9.387	4.90159	5.54846	6.59305	9.50724	1538	1782	1707	1354	1557	1715	1010	1781	972	998	1023	1512
ENSSSCG00000000811	chr5	77782183	77795177	+	PCED1B		ENSSSCT00000000880;ENSSSCT00000070034;ENSSSCT00000088229;ENSSSCT00000047265;ENSSSCT00000039783	NA	NA	NA	NA	NA	PC-esterase domain containing 1B [Source:HGNC Symbol;Acc:HGNC:28255]	protein_coding	1.90257	1.99405	0.640485	1.01535	0.715026	1.65898	0.310497	1.15447	0.561441	0.427272	0.443168	0.863768	298	297	121	152	135	295	57	225	114	79	71	142
ENSSSCG00000000816	chr5	78423383	78476195	-	SENP1	100157986	ENSSSCT00000064113	GO:0005654(nucleoplasm);GO:0005925(focal adhesion);GO:0006508(proteolysis);GO:0006919(activation of cysteine-type endopeptidase activity involved in apoptotic process);GO:0008233(peptidase activity);GO:0008234(cysteine-type peptidase activity);GO:0016787(hydrolase activity);GO:0016926(protein desumoylation);GO:0031965(nuclear membrane);GO:0045944(positive regulation of transcription by RNA polyme…	NA	K08592	EC:3.4.22.68	NA	SUMO specific peptidase 1 [Source:VGNC Symbol;Acc:VGNC:92712]	protein_coding	1.97526	2.10398	1.43499	2.76696	2.13326	1.28557	1.69752	1.66364	1.74861	1.67289	1.17366	2.33167	384	390	334	512	499	283	385	401	440	382	231	470
ENSSSCG00000000820	chr5	78698577	78700109	+	H1-7		ENSSSCT00000000893	NA	NA	NA	NA	NA	H1.7 linker histone [Source:HGNC Symbol;Acc:HGNC:24893]	protein_coding	0	0	0	0	0	0	0	0	0	0	0	0.088019	0	0	0	0	0	0	0	0	0	0	0	4
ENSSSCG00000000837	chr5	79788572	80067795	-	CHST11	100157186	ENSSSCT00000064544;ENSSSCT00000100474	GO:0000139(Golgi membrane);GO:0001537(N-acetylgalactosamine 4-O-sulfotransferase activity);GO:0001701(in utero embryonic development);GO:0002063(chondrocyte development);GO:0005794(Golgi apparatus);GO:0005975(carbohydrate metabolic process);GO:0006915(apoptotic process);GO:0007179(transforming growth factor beta receptor signaling pathway);GO:0007585(respiratory gaseous exchange by respiratory sy…	00532(Glycosaminoglycan biosynthesis - chondroitin sulfate / dermatan sulfate);00532(Glycosaminoglycan biosynthesis - chondroitin sulfate / dermatan sulfate)	K01017	EC:2.8.2.5	NA	carbohydrate sulfotransferase 11 [Source:VGNC Symbol;Acc:VGNC:86675]	protein_coding	1.36668	1.36171	0.988485	1.6311	1.00596	1.05811	1.43694	1.5567	0.861813	1.19569	0.828723	0.916032	373	355	323	424	330	328	458	527	305	384	230	260
ENSSSCG00000000838	chr5	79593915	79720895	+	SLC41A2	100519603	ENSSSCT00000039548	GO:0006812(cation transport);GO:0008324(cation transmembrane transporter activity);GO:0016020(membrane);GO:0016021(integral component of membrane);GO:0022890(inorganic cation transmembrane transporter activity);GO:0030001(metal ion transport);GO:0098655(cation transmembrane transport)	NA	NA	NA	NA	solute carrier family 41 member 2 [Source:VGNC Symbol;Acc:VGNC:93114]	protein_coding	5.61044	7.03959	14.0548	10.5701	9.16042	8.61357	7.39063	9.05393	5.92835	7.36659	9.32649	6.22317	1277	1527	3827	2291	2508	2221	1966	2554	1747	1970	2149	1471
ENSSSCG00000000839	chr5	79492750	79558701	+	ALDH1L2	100151976	ENSSSCT00000000913	GO:0003824(catalytic activity);GO:0004029(aldehyde dehydrogenase (NAD+) activity);GO:0005654(nucleoplasm);GO:0005739(mitochondrion);GO:0006635(fatty acid beta-oxidation);GO:0006730(one-carbon metabolic process);GO:0006740(NADPH regeneration);GO:0009058(biosynthetic process);GO:0009258(10-formyltetrahydrofolate catabolic process);GO:0016155(formyltetrahydrofolate dehydrogenase activity);GO:0016491…	00670(One carbon pool by folate)	K00289	EC:1.5.1.6	NA	aldehyde dehydrogenase 1 family member L2 [Source:VGNC Symbol;Acc:VGNC:97882]	protein_coding	36.9758	35.7748	48.3603	27.5923	30.9309	43.9243	34.0008	47.7629	38.6615	33.1127	40.58	36.0547	11958	11025	18711	8497	12032	16094	12847	19139	16187	12580	13287	12104
ENSSSCG00000000840	chr5	79417130	79474609	-	WASHC4	100520136	ENSSSCT00000000914;ENSSSCT00000067256	GO:0005654(nucleoplasm);GO:0005768(endosome);GO:0007032(endosome organization);GO:0016197(endosomal transport);GO:0031083(BLOC-1 complex);GO:0071203(WASH complex);GO:0071203(WASH complex)	04144(Endocytosis);04144(Endocytosis)	NA	NA	NA	WASH complex subunit 4 [Source:VGNC Symbol;Acc:VGNC:94895]	protein_coding	10.9798	11.028	10.3773	10.3191	11.1837	12.9029	10.8886	11.0958	10.9501	11.762	10.8136	13.6187	3981	3810	4501	3563	4877	5300	4613	4985	5140	5010	3969	5126
ENSSSCG00000000841	chr5	79356164	79412235	+	APPL2	100190991,334	ENSSSCT00000000915;ENSSSCT00000091562;ENSSSCT00000084295;ENSSSCT00000042610;ENSSSCT00000069223	GO:0001726(ruffle);GO:0001786(phosphatidylserine binding);GO:0005634(nucleus);GO:0005768(endosome);GO:0005886(plasma membrane);GO:0006606(protein import into nucleus);GO:0007049(cell cycle);GO:0007179(transforming growth factor beta receptor signaling pathway);GO:0010008(endosome membrane);GO:0016020(membrane);GO:0031410(cytoplasmic vesicle);GO:0031901(early endosome membrane);GO:0031982(vesicle)…	NA	NA	NA	NA	adaptor protein, phosphotyrosine interacting with PH domain and leucine zipper 2 [Source:VGNC Symbol;Acc:VGNC:85427]	protein_coding	8.78885	8.78818	9.09437	14.388	11.8568	9.30192	7.08925	6.20911	6.31926	9.36807	7.34166	8.99876	1758	1675	2176	2739	2852	2109	1657	1540	1636	2201	1488	1871
ENSSSCG00000000842	chr5	79281588	79314995	-	KANSL2	100513860	ENSSSCT00000061249	GO:0000123(histone acetyltransferase complex);GO:0005634(nucleus);GO:0005654(nucleoplasm);GO:0005829(cytosol);GO:0005886(plasma membrane);GO:0015629(actin cytoskeleton);GO:0043981(histone H4-K5 acetylation);GO:0043982(histone H4-K8 acetylation);GO:0043984(histone H4-K16 acetylation);GO:0044545(NSL complex);GO:0051571(positive regulation of histone H3-K4 methylation)	NA	NA	NA	NA	KAT8 regulatory NSL complex subunit 2 [Source:VGNC Symbol;Acc:VGNC:89300]	protein_coding	14.2228	12.3922	10.9309	15.3314	14.7312	11.9901	13.1612	12.7589	13.1784	12.2579	9.57267	12.4194	2239	1859	2059	2298	2790	2139	2421	2489	2686	2267	1526	2030
ENSSSCG00000000843	chr5	80179635	80236219	-	TXNRD1	396681	ENSSSCT00000074845;ENSSSCT00000075178;ENSSSCT00000072574	GO:0000166(nucleotide binding);GO:0001650(fibrillar center);GO:0001707(mesoderm formation);GO:0004791(thioredoxin-disulfide reductase activity);GO:0005634(nucleus);GO:0005654(nucleoplasm);GO:0005737(cytoplasm);GO:0005829(cytosol);GO:0007369(gastrulation);GO:0008283(cell population proliferation);GO:0016491(oxidoreductase activity);GO:0016668(oxidoreductase activity, acting on a sulfur group of do…	00450(Selenocompound metabolism);05200(Pathways in cancer);05225(Hepatocellular carcinoma);05225(Hepatocellular carcinoma)	K22182	EC:1.8.1.9	NA	thioredoxin reductase 1 [Source:NCBI gene (formerly Entrezgene);Acc:396681]	protein_coding	18.2557	13.5899	24.6851	12.2035	15.2747	22.7143	28.5186	23.03	22.1935	13.3406	19.9168	11.6989	2161	1534	3496	1376	2175	3046	3944	3377	3402	1855	2388	1439
ENSSSCG00000000844	chr5	80334748	80353768	+	NFYB	100157587	ENSSSCT00000048491	GO:0000976(transcription cis-regulatory region binding);GO:0000978(RNA polymerase II cis-regulatory region sequence-specific DNA binding);GO:0001228(DNA-binding transcription activator activity, RNA polymerase II-specific);GO:0003677(DNA binding);GO:0003700(DNA-binding transcription factor activity);GO:0005634(nucleus);GO:0005654(nucleoplasm);GO:0006355(regulation of DNA-templated transcription);…	04612(Antigen processing and presentation);05152(Tuberculosis);05166(Human T-cell leukemia virus 1 infection)	NA	NA	NF-YB	nuclear transcription factor Y subunit beta [Source:VGNC Symbol;Acc:VGNC:90730]	protein_coding	7.46387	6.54077	6.56068	7.77069	6.43919	6.01443	6.81381	8.55815	8.69117	6.87085	4.95519	5.61564	1020	852	1073	1011	1059	932	1088	1449	1538	1103	686	797
ENSSSCG00000000846	chr5	80368240	80409775	-	HCFC2	100514768	ENSSSCT00000000923	GO:0005634(nucleus);GO:0005654(nucleoplasm);GO:0005737(cytoplasm);GO:0005829(cytosol);GO:0005886(plasma membrane);GO:0010468(regulation of gene expression);GO:0016604(nuclear body);GO:0044665(MLL1/2 complex);GO:0048188(Set1C/COMPASS complex);GO:0071339(MLL1 complex)	05168(Herpes simplex virus 1 infection)	NA	NA	NA	host cell factor C2 [Source:VGNC Symbol;Acc:VGNC:88800]	protein_coding	6.45974	6.28574	6.06662	4.58255	4.8254	5.19269	5.45666	6.74905	6.15599	6.25633	5.08436	6.21673	2799	2595	3144	1890	2515	2549	2762	3623	3453	3184	2230	2796
ENSSSCG00000000847	chr5	80473234	80492287	-	TDG	100155184	ENSSSCT00000000924	GO:0000287(magnesium ion binding);GO:0000700(mismatch base pair DNA N-glycosylase activity);GO:0003690(double-stranded DNA binding);GO:0004844(uracil DNA N-glycosylase activity);GO:0005524(ATP binding);GO:0005634(nucleus);GO:0005654(nucleoplasm);GO:0005886(plasma membrane);GO:0006284(base-excision repair);GO:0006285(base-excision repair, AP site formation);GO:0006298(mismatch repair);GO:0008263(p…	03410(Base excision repair)	K20813	EC:3.2.2.29	NA	thymine DNA glycosylase [Source:VGNC Symbol;Acc:VGNC:93842]	protein_coding	4.88202	4.3518	3.5789	4.88685	3.87024	3.65838	4.85892	5.63292	4.61748	3.70338	4.20305	3.56453	743	631	652	708	709	631	864	1062	910	662	648	563
ENSSSCG00000000848	chr5	80410372	80473274	+	GLT8D2	100514961	ENSSSCT00000057717	GO:0005794(Golgi apparatus);GO:0016740(transferase activity);GO:0016757(glycosyltransferase activity)	NA	NA	NA	NA	glycosyltransferase 8 domain containing 2 [Source:VGNC Symbol;Acc:VGNC:88501]	protein_coding	9.7037	5.69608	23.0053	13.1343	11.4331	7.24484	14.1383	16.2503	12.5699	6.5877	4.9947	9.05062	1175	657	3331	1514	1665	994	1999	2437	1970	937	612	1137
ENSSSCG00000000849	chr5	80511506	80530991	-	HSP90B1	397191	ENSSSCT00000000926;ENSSSCT00000047341	GO:0000166(nucleotide binding);GO:0001666(response to hypoxia);GO:0003723(RNA binding);GO:0005524(ATP binding);GO:0005737(cytoplasm);GO:0005783(endoplasmic reticulum);GO:0005788(endoplasmic reticulum lumen);GO:0005789(endoplasmic reticulum membrane);GO:0005829(cytosol);GO:0006457(protein folding);GO:0016887(ATP hydrolysis activity);GO:0019903(protein phosphatase binding);GO:0030433(ubiquitin-depe…	04141(Protein processing in endoplasmic reticulum);04151(PI3K-Akt signaling pathway);04657(IL-17 signaling pathway);04915(Estrogen signaling pathway);04918(Thyroid hormone synthesis);05132(Salmonella infection);05200(Pathways in cancer);05215(Prostate cancer);05418(Fluid shear stress and atherosclerosis);05418(Fluid shear stress and atherosclerosis)	NA	NA	NA	heat shock protein 90 beta family member 1 [Source:VGNC Symbol;Acc:VGNC:103290]	protein_coding	82.7206	68.5788	69.2185	74.6331	78.9572	90.506	93.5184	92.6359	98.354	28.7716	98.6153	77.0024	13983	11047	13999	12012	16054	17333	18471	19402	21524	5713	16877	13513
ENSSSCG00000000853	chr5	80644245	80692941	+	NT5DC3	100521376	ENSSSCT00000091207;ENSSSCT00000023398;ENSSSCT00000069041	GO:0008253(5'-nucleotidase activity);GO:0016787(hydrolase activity);GO:0043235(receptor complex);GO:0046872(metal ion binding);GO:0046872(metal ion binding)	NA	NA	NA	NA	5'-nucleotidase domain containing 3 [Source:VGNC Symbol;Acc:VGNC:90924]	protein_coding	0.736987	0.957586	0.517968	1.11795	0.917421	0.446109	0.422252	0.599143	0.872784	0.348649	0.420602	0.502886	306	379	257	442	457	210	205	308	468	171	177	217
ENSSSCG00000000854	chr5	80694230	80858598	-	ENSSSCG00000000854		ENSSSCT00000000931	GO:0005041(low-density lipoprotein particle receptor activity);GO:0005509(calcium ion binding);GO:0005540(hyaluronic acid binding);GO:0006897(endocytosis);GO:0007155(cell adhesion);GO:0016020(membrane);GO:0016021(integral component of membrane);GO:0030169(low-density lipoprotein particle binding)	NA	NA	NA	NA		protein_coding	0.019577	0	0	0	0	0	0	0	0.022018	0	0	0	8	0	0	0	0	0	0	0	12	0	0	0
ENSSSCG00000000856	chr5	81385435	81453790	+	PAH	100521900	ENSSSCT00000000934;ENSSSCT00000022294;ENSSSCT00000074350	GO:0004497(monooxygenase activity);GO:0004505(phenylalanine 4-monooxygenase activity);GO:0005506(iron ion binding);GO:0006559(L-phenylalanine catabolic process);GO:0006571(tyrosine biosynthetic process);GO:0009072(aromatic amino acid family metabolic process);GO:0016491(oxidoreductase activity);GO:0016714(oxidoreductase activity, acting on paired donors, with incorporation or reduction of molecul…	00360(Phenylalanine metabolism);00400(Phenylalanine, tyrosine and tryptophan biosynthesis);00790(Folate biosynthesis);01100(Metabolic pathways);01230(Biosynthesis of amino acids);01230(Biosynthesis of amino acids)	K00500	EC:1.14.16.1	NA	phenylalanine hydroxylase [Source:VGNC Symbol;Acc:VGNC:91155]	protein_coding	0.601193	0.103647	3.73696	0.0568093	0.359492	1.02138	0.516314	0.843085	5.49002	0.188786	0.235442	0.480969	144	24	1071	13	106	277	146	251	1702	54	58	120
ENSSSCG00000000857	chr5	81775970	81848033	+	IGF1	397491,101055342,101055488	ENSSSCT00000050807;ENSSSCT00000000936;ENSSSCT00000000935;ENSSSCT00000035604;ENSSSCT00000023468	GO:0005159(insulin-like growth factor receptor binding);GO:0005179(hormone activity);GO:0005576(extracellular region);GO:0005615(extracellular space);GO:0005886(plasma membrane);GO:0007165(signal transduction);GO:0008083(growth factor activity);GO:0008284(positive regulation of cell population proliferation);GO:0035867(alphav-beta3 integrin-IGF-1-IGF1R complex);GO:0043066(negative regulation of a…	01521(EGFR tyrosine kinase inhibitor resistance);01522(Endocrine resistance);04010(MAPK signaling pathway);04014(Ras signaling pathway);04015(Rap1 signaling pathway);04066(HIF-1 signaling pathway);04068(FoxO signaling pathway);04114(Oocyte meiosis);04115(p53 signaling pathway);04150(mTOR signaling pathway);04151(PI3K-Akt signaling pathway);04152(AMPK signaling pathway);04211(Longevity regulating …	NA	NA	NA	insulin like growth factor 1 [Source:VGNC Symbol;Acc:VGNC:98044]	protein_coding	2.84829	3.1771	2.74262	3.8238	3.82414	3.57912	3.10782	4.17534	3.86475	3.71659	3.79312	2.93049	570	607	658	728	921	811	727	1035	1000	873	769	609
ENSSSCG00000000858	chr5	82018915	82020266	+	PMCH	396962	ENSSSCT00000000937	GO:0005634(nucleus);GO:0007165(signal transduction);GO:0007268(chemical synaptic transmission);GO:0007631(feeding behavior);GO:0030354(melanin-concentrating hormone activity);GO:0031777(type 1 melanin-concentrating hormone receptor binding);GO:0045202(synapse)	04080(Neuroactive ligand-receptor interaction)	NA	NA	NA	pro-melanin concentrating hormone [Source:VGNC Symbol;Acc:VGNC:103311]	protein_coding	0.019474	0.175481	0	0	0	0	0	0.077729	0.126611	0	0	0	1	6	0	0	0	0	0	4	6	0	0	0
ENSSSCG00000000859	chr5	82019216	82091376	-	PARPBP	100523000	ENSSSCT00000050761	GO:0000785(chromatin);GO:0005634(nucleus);GO:0005654(nucleoplasm);GO:0005737(cytoplasm);GO:0007165(signal transduction);GO:0007268(chemical synaptic transmission);GO:0030354(melanin-concentrating hormone activity);GO:0045202(synapse);GO:2000042(negative regulation of double-strand break repair via homologous recombination)	NA	NA	NA	NA	PARP1 binding protein [Source:VGNC Symbol;Acc:VGNC:91183]	protein_coding	0.394595	0.307482	0.483103	0.801431	0.798681	0.485499	0.298759	1.10633	0.340633	0.389021	0.744618	0.33661	56	42	82	109	137	79	50	195	63	65	107	50
ENSSSCG00000000860	chr5	82091517	82145528	+	NUP37	100626170	ENSSSCT00000060058	GO:0000776(kinetochore);GO:0005635(nuclear envelope);GO:0005654(nucleoplasm);GO:0031080(nuclear pore outer ring)	03013(RNA transport);05014(Amyotrophic lateral sclerosis)	NA	NA	NA	nucleoporin 37 [Source:VGNC Symbol;Acc:VGNC:90980]	protein_coding	2.52495	2.73745	1.90132	2.61655	2.39833	1.89348	2.6434	2.67169	2.01105	1.8901	1.44576	2.01899	436	450	392	430	498	370	533	571	449	383	253	362
ENSSSCG00000000862	chr5	82361872	82460814	+	GNPTAB	100523554	ENSSSCT00000073525;ENSSSCT00000074016;ENSSSCT00000028915;ENSSSCT00000065519	GO:0000139(Golgi membrane);GO:0003976(UDP-N-acetylglucosamine-lysosomal-enzyme N-acetylglucosaminephosphotransferase activity);GO:0005509(calcium ion binding);GO:0005794(Golgi apparatus);GO:0007040(lysosome organization);GO:0009306(protein secretion);GO:0016020(membrane);GO:0016021(integral component of membrane);GO:0016256(N-glycan processing to lysosome);GO:0016740(transferase activity);GO:0016…	04142(Lysosome);04142(Lysosome)	K08239	EC:2.7.8.17	NA	N-acetylglucosamine-1-phosphate transferase subunits alpha and beta [Source:VGNC Symbol;Acc:VGNC:88546]	protein_coding	10.6451	10.4044	8.22123	11.0562	10.4331	9.49363	10.1091	10.5304	9.35696	9.39542	7.45958	8.42065	2755	2566	2545	2725	3247	2784	3057	3376	3135	2856	1955	2263
ENSSSCG00000000863	chr5	82493034	82501656	+	SYCP3	100523378	ENSSSCT00000056890	GO:0000795(synaptonemal complex);GO:0005634(nucleus);GO:0035092(sperm DNA condensation)	03440(Homologous recombination)	NA	NA	NA	synaptonemal complex protein 3 [Source:HGNC Symbol;Acc:HGNC:18130]	protein_coding	5.40695	6.96562	4.35717	4.59817	4.36965	4.36958	4.67945	4.43285	5.48344	5.2756	4.97973	7.17344	390	479	376	316	379	357	395	396	512	447	364	537
ENSSSCG00000000864	chr5	82497648	82544263	-	CHPT1	100523738	ENSSSCT00000054575;ENSSSCT00000037997;ENSSSCT00000106865	GO:0004142(diacylglycerol cholinephosphotransferase activity);GO:0005789(endoplasmic reticulum membrane);GO:0005794(Golgi apparatus);GO:0006629(lipid metabolic process);GO:0006656(phosphatidylcholine biosynthetic process);GO:0006657(CDP-choline pathway);GO:0006663(platelet activating factor biosynthetic process);GO:0008654(phospholipid biosynthetic process);GO:0016020(membrane);GO:0016021(integra…	00440(Phosphonate and phosphinate metabolism);00564(Glycerophospholipid metabolism);00565(Ether lipid metabolism);01100(Metabolic pathways);05231(Choline metabolism in cancer);05231(Choline metabolism in cancer)	K00994	EC:2.7.8.2	NA	choline phosphotransferase 1 [Source:VGNC Symbol;Acc:VGNC:86659]	protein_coding	73.0121	73.2344	71.4586	71.6097	66.7144	58.5286	64.2821	53.4528	74.1643	55.7918	66.0414	65.5741	24450	23371	28630	22834	26873	22207	25152	22180	32155	21948	22391	22798
ENSSSCG00000000866	chr5	82557615	82696126	-	MYBPC1	100523187	ENSSSCT00000043860;ENSSSCT00000060944;ENSSSCT00000043121;ENSSSCT00000049143	GO:0006936(muscle contraction);GO:0017022(myosin binding);GO:0017022(myosin binding)	NA	NA	NA	NA	myosin binding protein C1 [Source:VGNC Symbol;Acc:VGNC:90499]	protein_coding	0.294924	0	0.0155362	0.00949884	0.0171907	0.0289901	0.414255	1.77639	0.0844723	0	0.0183588	0	127	0	8	5	9	15	209	942	47	0	8	0
ENSSSCG00000000867	chr5	82726360	82795864	-	SPIC	102164462	ENSSSCT00000000947	GO:0000978(RNA polymerase II cis-regulatory region sequence-specific DNA binding);GO:0000981(DNA-binding transcription factor activity, RNA polymerase II-specific);GO:0001228(DNA-binding transcription activator activity, RNA polymerase II-specific);GO:0001824(blastocyst development);GO:0003677(DNA binding);GO:0003700(DNA-binding transcription factor activity);GO:0005634(nucleus);GO:0006355(regula…	NA	NA	NA	ETS	Spi-C transcription factor [Source:VGNC Symbol;Acc:VGNC:104061]	protein_coding	1.61368	1.91956	1.27836	1.16537	0.809018	1.01288	0.933415	1.36522	0.094654	0.531904	1.37231	1.29841	184	208	174	126	111	131	124	192	14	71	158	153
ENSSSCG00000000869	chr5	82813717	82913155	-	UTP20	100524087	ENSSSCT00000000949	GO:0005730(nucleolus);GO:0005886(plasma membrane);GO:0006364(rRNA processing);GO:0030686(90S preribosome);GO:0032040(small-subunit processome)	NA	NA	NA	NA	UTP20 small subunit processome component [Source:VGNC Symbol;Acc:VGNC:94784]	protein_coding	2.30377	2.50077	2.18799	2.88292	2.59739	2.48278	3.1162	2.55804	2.78841	1.96298	2.44371	2.4968	943	976	1072	1124	1279	1152	1490	1297	1478	944	1013	1061
ENSSSCG00000000870	chr5	82796176	82815936	+	ARL1	595113,57016	ENSSSCT00000091276;ENSSSCT00000043304;ENSSSCT00000000950	GO:0000166(nucleotide binding);GO:0003924(GTPase activity);GO:0005515(protein binding);GO:0005525(GTP binding);GO:0005737(cytoplasm);GO:0005794(Golgi apparatus);GO:0005802(trans-Golgi network);GO:0005829(cytosol);GO:0006886(intracellular protein transport);GO:0007030(Golgi organization);GO:0008047(enzyme activator activity);GO:0009404(toxin metabolic process);GO:0016192(vesicle-mediated transport…	NA	NA	NA	NA	ADP ribosylation factor like GTPase 1 [Source:VGNC Symbol;Acc:VGNC:85513]	protein_coding	16.1015	16.762	16.2906	14.2705	14.7987	18.7751	16.2889	18.0026	16.3762	14.1709	18.6823	16.5959	6095	6047	7378	5144	6738	8052	7203	8443	8025	6301	7160	6521
ENSSSCG00000000871	chr5	82973284	83031157	+	SLC5A8	100524807	ENSSSCT00000000951	GO:0005343(organic acid:sodium symporter activity);GO:0006814(sodium ion transport);GO:0015129(lactate transmembrane transporter activity);GO:0015293(symporter activity);GO:0015552(propionate transmembrane transporter activity);GO:0015636(short-chain fatty acid transmembrane transporter activity);GO:0015718(monocarboxylic acid transport);GO:0015730(propanoate transport);GO:0015913(short-chain fat…	NA	NA	NA	NA	solute carrier family 5 member 8 [Source:VGNC Symbol;Acc:VGNC:93148]	protein_coding	0	0.051047	0.176787	0	0	0.015221	0	0	0.0189133	0.0173706	0	0	0	12	52	0	0	5	0	0	6	5	0	0
ENSSSCG00000000873	chr5	83052958	83411449	-	ANO4	100525519	ENSSSCT00000052853	GO:0005229(intracellular calcium activated chloride channel activity);GO:0005254(chloride channel activity);GO:0005886(plasma membrane);GO:0006821(chloride transport);GO:0016020(membrane);GO:0016021(integral component of membrane);GO:0017128(phospholipid scramblase activity);GO:0046983(protein dimerization activity);GO:0051649(establishment of localization in cell);GO:0055085(transmembrane transp…	NA	NA	NA	NA	anoctamin 4 [Source:VGNC Symbol;Acc:VGNC:85357]	protein_coding	0	0	0	0	0	0	0	0.0293945	0.0940442	0	0	0	0	0	0	0	0	0	0	8	26	0	0	0
ENSSSCG00000000874	chr5	83560962	83600252	-	GAS2L3	100154381	ENSSSCT00000055285;ENSSSCT00000047782;ENSSSCT00000030549	GO:0000226(microtubule cytoskeleton organization);GO:0003779(actin binding);GO:0005856(cytoskeleton);GO:0005884(actin filament);GO:0008017(microtubule binding);GO:0008093(cytoskeletal anchor activity);GO:0015629(actin cytoskeleton);GO:0015630(microtubule cytoskeleton);GO:0030036(actin cytoskeleton organization);GO:0051015(actin filament binding);GO:0051764(actin crosslink formation);GO:0051764(ac…	NA	NA	NA	NA	growth arrest specific 2 like 3 [Source:VGNC Symbol;Acc:VGNC:88357]	protein_coding	2.1884	1.05403	0.687714	1.35684	0.868274	0.592095	0.751406	1.18739	0.709766	0.307753	0.402919	0.633814	448	206	169	265	214	138	180	302	188	74	84	135
ENSSSCG00000000875	chr5	83604294	83683086	-	NR1H4	100153960	ENSSSCT00000090682	GO:0000122(negative regulation of transcription by RNA polymerase II);GO:0000791(euchromatin);GO:0000977(RNA polymerase II transcription regulatory region sequence-specific DNA binding);GO:0000978(RNA polymerase II cis-regulatory region sequence-specific DNA binding);GO:0000981(DNA-binding transcription factor activity, RNA polymerase II-specific);GO:0001221(transcription coregulator binding);GO:…	04976(Bile secretion)	NA	NA	THR-like	nuclear receptor subfamily 1 group H member 4 [Source:VGNC Symbol;Acc:VGNC:90872]	protein_coding	0	0.00407328	0	0	0	0.00663727	0	0	0	0.00206248	0.00287503	0.00420631	0	2	0	0	0	3	0	0	0	1	1	2
ENSSSCG00000000877	chr5	83813206	83878668	-	SCYL2	100511018,6358	ENSSSCT00000000960;ENSSSCT00000053383;ENSSSCT00000049215;ENSSSCT00000045567	GO:0002092(positive regulation of receptor internalization);GO:0004672(protein kinase activity);GO:0005102(signaling receptor binding);GO:0005524(ATP binding);GO:0006468(protein phosphorylation);GO:0007420(brain development);GO:0008333(endosome to lysosome transport);GO:0021860(pyramidal neuron development);GO:0090090(negative regulation of canonical Wnt signaling pathway);GO:2000286(receptor int…	NA	NA	NA	NA	SCY1 like pseudokinase 2 [Source:VGNC Symbol;Acc:VGNC:98305]	protein_coding	9.31961	9.59165	10.25	11.7695	10.2265	8.34787	8.52813	6.21094	7.55298	9.44975	8.38342	7.33927	3244	3182	4269	3902	4283	3294	3469	2679	3405	3865	2956	2653
ENSSSCG00000000883	chr5	84720130	84720959	+	ENSSSCG00000000883		ENSSSCT00000000967	NA	NA	NA	NA	NA		protein_coding	0.160008	0	0	0.334312	0	0.091823	0	0	0.242811	0.23969	0	0	4	0	0	8	0	3	0	0	8	7	0	0
ENSSSCG00000000884	chr5	85166628	85258364	-	APAF1	100513283	ENSSSCT00000064350	GO:0000166(nucleotide binding);GO:0005524(ATP binding);GO:0005737(cytoplasm);GO:0005829(cytosol);GO:0006508(proteolysis);GO:0006915(apoptotic process);GO:0006919(activation of cysteine-type endopeptidase activity involved in apoptotic process);GO:0008233(peptidase activity);GO:0008635(activation of cysteine-type endopeptidase activity involved in apoptotic process by cytochrome c);GO:0032991(prot…	01524(Platinum drug resistance);04115(p53 signaling pathway);04210(Apoptosis);04215(Apoptosis - multiple species);05010(Alzheimer disease);05012(Parkinson disease);05014(Amyotrophic lateral sclerosis);05016(Huntington disease);05020(Prion disease);05022(Pathways of neurodegeneration - multiple diseases);05134(Legionellosis);05152(Tuberculosis);05160(Hepatitis C);05161(Hepatitis B);05162(Measles);…	NA	NA	NA	apoptotic peptidase activating factor 1 [Source:VGNC Symbol;Acc:VGNC:85398]	protein_coding	9.47227	11.311	5.56363	23.5103	19.6224	11.1096	6.10964	7.13994	3.93854	5.15605	6.92886	7.05755	2901	3301	2039	6855	7227	3854	2186	2709	1562	1855	2148	2244
ENSSSCG00000000886	chr5	85284311	85292328	-	SLC25A3	100302698	ENSSSCT00000000970;ENSSSCT00000067942;ENSSSCT00000064711;ENSSSCT00000071444;ENSSSCT00000049040;ENSSSCT00000101313	GO:0005315(inorganic phosphate transmembrane transporter activity);GO:0005739(mitochondrion);GO:0005743(mitochondrial inner membrane);GO:0015293(symporter activity);GO:0016020(membrane);GO:0016021(integral component of membrane);GO:0031305(integral component of mitochondrial inner membrane);GO:0035435(phosphate ion transmembrane transport);GO:0044877(protein-containing complex binding);GO:1990547…	NA	NA	NA	NA	solute carrier family 25 member 3 [Source:VGNC Symbol;Acc:VGNC:93007]	protein_coding	313.5	333.37	332.395	304.127	307.257	313.355	299.554	307.541	348.295	301.834	458.307	319.046	28515	28894	36170	26339	33614	32291	31834	34659	41013	32248	42202	30125
ENSSSCG00000000890	chr5	86693843	86737222	-	NEDD1	100514234	ENSSSCT00000041043;ENSSSCT00000039030	GO:0000242(pericentriolar material);GO:0000278(mitotic cell cycle);GO:0000922(spindle pole);GO:0001650(fibrillar center);GO:0005654(nucleoplasm);GO:0005737(cytoplasm);GO:0005813(centrosome);GO:0005814(centriole);GO:0005829(cytosol);GO:0007020(microtubule nucleation);GO:0036064(ciliary basal body);GO:0043015(gamma-tubulin binding);GO:0045177(apical part of cell);GO:0045177(apical part of cell)	NA	NA	NA	NA	NEDD1 gamma-tubulin ring complex targeting factor [Source:VGNC Symbol;Acc:VGNC:90665]	protein_coding	2.97333	3.14293	3.50168	4.83707	6.30878	2.59341	3.87084	4.71336	2.86538	3.93976	3.89433	2.3838	573	577	807	887	1462	566	872	1125	715	892	760	477
ENSSSCG00000000891	chr5	87486512	87518515	+	LTA4H	100154219	ENSSSCT00000000975	GO:0004177(aminopeptidase activity);GO:0004301(epoxide hydrolase activity);GO:0004463(leukotriene-A4 hydrolase activity);GO:0005634(nucleus);GO:0005654(nucleoplasm);GO:0005737(cytoplasm);GO:0005829(cytosol);GO:0006508(proteolysis);GO:0008233(peptidase activity);GO:0008237(metallopeptidase activity);GO:0008270(zinc ion binding);GO:0016787(hydrolase activity);GO:0019370(leukotriene biosynthetic pro…	00590(Arachidonic acid metabolism);01100(Metabolic pathways)	K01254	EC:3.3.2.6	NA	leukotriene A4 hydrolase [Source:VGNC Symbol;Acc:VGNC:89882]	protein_coding	20.4034	18.3594	18.1918	13.9142	15.7435	18.4876	19.827	18.1914	17.6817	23.1231	14.7184	19.0913	2120	1818	2261	1376	1967	2176	2406	2341	2378	2822	1548	2059
ENSSSCG00000000892	chr5	87522542	87547455	+	HAL	100154617	ENSSSCT00000000976	GO:0003824(catalytic activity);GO:0004397(histidine ammonia-lyase activity);GO:0005737(cytoplasm);GO:0006547(histidine metabolic process);GO:0006548(histidine catabolic process);GO:0016829(lyase activity);GO:0016841(ammonia-lyase activity);GO:0019556(histidine catabolic process to glutamate and formamide);GO:0019557(histidine catabolic process to glutamate and formate)	00340(Histidine metabolism);01100(Metabolic pathways)	K01745	EC:4.3.1.3	NA	histidine ammonia-lyase [Source:VGNC Symbol;Acc:VGNC:88775]	protein_coding	0.059826	0	0.131719	0.109155	0.164267	0.021644	0.034793	0	0	0	0	0.106301	10	0	26	17	33	4	7	0	0	0	0	18
ENSSSCG00000000893	chr5	87553022	87569305	-	AMDHD1	100151804	ENSSSCT00000072367	GO:0005737(cytoplasm);GO:0006547(histidine metabolic process);GO:0016810(hydrolase activity, acting on carbon-nitrogen (but not peptide) bonds);GO:0016812(hydrolase activity, acting on carbon-nitrogen (but not peptide) bonds, in cyclic amides);GO:0019556(histidine catabolic process to glutamate and formamide);GO:0019557(histidine catabolic process to glutamate and formate);GO:0050480(imidazolonep…	00340(Histidine metabolism);01100(Metabolic pathways)	K01468	EC:3.5.2.7	NA	amidohydrolase domain containing 1 [Source:VGNC Symbol;Acc:VGNC:85275]	protein_coding	2.47462	1.95276	1.59411	0	0.671722	1.39952	1.79036	1.13559	1.7398	1.15932	0.569887	2.29156	142	107	110	0	47	91	120	81	129	78	34	137
ENSSSCG00000000894	chr5	87569798	87616183	+	CCDC38	100157054	ENSSSCT00000048030	GO:0005813(centrosome)	NA	NA	NA	NA	coiled-coil domain containing 38 [Source:VGNC Symbol;Acc:VGNC:86296]	protein_coding	0.196042	0.18067	0.110273	0.390045	0.266398	0.189223	0.17824	0.584334	0.270171	0.247667	0.198619	0.332014	38	33	26	71	62	41	40	139	67	56	39	66
ENSSSCG00000000895	chr5	87604596	87622879	-	SNRPF	100155855	ENSSSCT00000000979	GO:0000387(spliceosomal snRNP assembly);GO:0000398(mRNA splicing, via spliceosome);GO:0003723(RNA binding);GO:0005634(nucleus);GO:0005681(spliceosomal complex);GO:0005683(U7 snRNP);GO:0005685(U1 snRNP);GO:0005687(U4 snRNP);GO:0005689(U12-type spliceosomal complex);GO:0005829(cytosol);GO:0006397(mRNA processing);GO:0008380(RNA splicing);GO:0016020(membrane);GO:0016021(integral component of membran…	03040(Spliceosome)	NA	NA	NA	small nuclear ribonucleoprotein polypeptide F [Source:VGNC Symbol;Acc:VGNC:108511]	protein_coding	4.38571	3.78744	3.62215	4.35074	4.8715	3.22688	5.18012	7.13878	4.23112	3.39553	4.22946	3.84017	329	270	325	310	439	274	453	662	410	299	321	299
ENSSSCG00000000896	chr5	87671873	87784702	+	NTN4	100516554,8079	ENSSSCT00000000980;ENSSSCT00000050608	GO:0005576(extracellular region);GO:0005604(basement membrane);GO:0009887(animal organ morphogenesis);GO:0009888(tissue development);GO:0016322(neuron remodeling);GO:0016477(cell migration);GO:0034446(substrate adhesion-dependent cell spreading);GO:0043237(laminin-1 binding);GO:0043256(laminin complex);GO:0060668(regulation of branching involved in salivary gland morphogenesis by extracellular ma…	04360(Axon guidance);04360(Axon guidance)	NA	NA	NA	netrin 4 [Source:VGNC Symbol;Acc:VGNC:90933]	protein_coding	6.63314	3.31538	3.81676	4.24003	4.83878	4.25412	4.51106	7.6216	3.38908	2.56806	3.16163	4.70338	1180	562	813	718	1036	858	938	1680	781	537	570	869
ENSSSCG00000000900	chr5	88031979	88104742	-	VEZT	100517653	ENSSSCT00000000984;ENSSSCT00000097777	GO:0005634(nucleus);GO:0005654(nucleoplasm);GO:0005829(cytosol);GO:0005886(plasma membrane);GO:0005912(adherens junction);GO:0016020(membrane);GO:0016021(integral component of membrane);GO:0017022(myosin binding);GO:0098609(cell-cell adhesion);GO:0098609(cell-cell adhesion)	NA	NA	NA	NA	vezatin, adherens junctions transmembrane protein [Source:VGNC Symbol;Acc:VGNC:94819]	protein_coding	5.55685	6.00246	4.6438	14.8657	11.9559	4.66431	5.35722	5.37517	4.47039	5.93229	4.80801	5.51726	1781	1834	1782	4537	4609	1694	2006	2135	1855	2234	1561	1836
ENSSSCG00000000901	chr5	88104899	88221828	+	FGD6	100737604	ENSSSCT00000062706	GO:0005085(guanyl-nucleotide exchange factor activity);GO:0005737(cytoplasm);GO:0005856(cytoskeleton);GO:0043087(regulation of GTPase activity);GO:0046872(metal ion binding)	NA	NA	NA	NA	FYVE, RhoGEF and PH domain containing 6 [Source:VGNC Symbol;Acc:VGNC:88099]	protein_coding	1.34227	2.0387	0.583118	0.971519	1.08618	0.839783	1.01575	1.09683	0.921951	0.866825	0.97007	1.25603	299	432	155	206	291	212	264	302	266	227	219	290
ENSSSCG00000000902	chr5	88231274	88277997	+	NR2C1	100516014	ENSSSCT00000000986	GO:0000122(negative regulation of transcription by RNA polymerase II);GO:0000978(RNA polymerase II cis-regulatory region sequence-specific DNA binding);GO:0001227(DNA-binding transcription repressor activity, RNA polymerase II-specific);GO:0003677(DNA binding);GO:0003700(DNA-binding transcription factor activity);GO:0004879(nuclear receptor activity);GO:0005634(nucleus);GO:0006355(regulation of D…	NA	NA	NA	RXR-like	nuclear receptor subfamily 2 group C member 1 [Source:VGNC Symbol;Acc:VGNC:90875]	protein_coding	3.76119	4.94297	4.00687	7.09097	6.03548	3.9201	3.65413	4.42125	3.97662	4.28069	4.04313	5.39367	678	849	864	1217	1308	801	770	988	928	907	738	1009
ENSSSCG00000000905	chr5	88292773	88317236	+	ENSSSCG00000000905		ENSSSCT00000053443;ENSSSCT00000071189;ENSSSCT00000000989;ENSSSCT00000087211	GO:0005739(mitochondrion);GO:0005743(mitochondrial inner membrane);GO:0005747(mitochondrial respiratory chain complex I);GO:0006979(response to oxidative stress);GO:0016020(membrane);GO:0032981(mitochondrial respiratory chain complex I assembly);GO:0070469(respirasome);GO:0070469(respirasome)	00190(Oxidative phosphorylation);01100(Metabolic pathways);04714(Thermogenesis);04723(Retrograde endocannabinoid signaling);04932(Non-alcoholic fatty liver disease);05010(Alzheimer disease);05012(Parkinson disease);05014(Amyotrophic lateral sclerosis);05016(Huntington disease);05020(Prion disease);05022(Pathways of neurodegeneration - multiple diseases);05022(Pathways of neurodegeneration - multi…	NA	NA	NA	NADH:ubiquinone oxidoreductase subunit A12 [Source:VGNC Symbol;Acc:VGNC:103305]	protein_coding	10.8744	13.2248	7.26332	9.6899	11.8851	12.4088	9.47801	10.9633	11.5868	12.0002	13.5247	10.8264	1732	2006	1384	1469	2275	2238	1763	2163	2388	2244	2180	1789
ENSSSCG00000000906	chr5	88438365	88682319	+	TMCC3	100518487	ENSSSCT00000056101	GO:0005783(endoplasmic reticulum);GO:0016020(membrane);GO:0016021(integral component of membrane);GO:0042802(identical protein binding);GO:0071889(14-3-3 protein binding)	NA	NA	NA	NA	transmembrane and coiled-coil domain family 3 [Source:VGNC Symbol;Acc:VGNC:98375]	protein_coding	1.48379	1.52458	1.14406	1.2995	1.26392	1.44812	1.28251	1.28425	1.3049	1.25163	0.925948	1.37487	410	402	378	342	420	453	414	440	467	406	259	395
ENSSSCG00000000907	chr5	88900234	89055924	-	PLXNC1	100519487	ENSSSCT00000000991	GO:0005524(ATP binding);GO:0007165(signal transduction);GO:0016020(membrane);GO:0016021(integral component of membrane);GO:0016301(kinase activity);GO:0016310(phosphorylation);GO:0016740(transferase activity);GO:0017154(semaphorin receptor activity);GO:0071526(semaphorin-plexin signaling pathway)	04360(Axon guidance)	NA	NA	NA	plexin C1 [Source:VGNC Symbol;Acc:VGNC:91584]	protein_coding	2.06886	0.979145	0.855189	2.36747	1.7001	1.48035	1.05526	1.08137	1.3592	0.688929	0.514585	0.778734	723	326	358	788	714	586	431	468	615	283	182	283
ENSSSCG00000000908	chr5	89702682	89714279	+	ENSSSCG00000000908		ENSSSCT00000075768;ENSSSCT00000087389	GO:0005634(nucleus);GO:0006511(ubiquitin-dependent protein catabolic process);GO:0061631(ubiquitin conjugating enzyme activity);GO:0070534(protein K63-linked ubiquitination);GO:0070534(protein K63-linked ubiquitination)	NA	NA	NA	NA		protein_coding	10.7574	10.7927	9.56614	9.62128	9.86236	12.5087	13.0504	13.8378	13.0467	8.9727	16.445	10.0358	3572	3415	3800	3042	3940	4706	5063	5693	5609	3500	5528	3459
ENSSSCG00000000910	chr5	89267944	89478791	-	CRADD	100520384	ENSSSCT00000089258;ENSSSCT00000000995;ENSSSCT00000092388;ENSSSCT00000092068	GO:0002020(protease binding);GO:0005634(nucleus);GO:0005737(cytoplasm);GO:0006919(activation of cysteine-type endopeptidase activity involved in apoptotic process);GO:0006977(DNA damage response, signal transduction by p53 class mediator resulting in cell cycle arrest);GO:0007165(signal transduction);GO:0030674(protein-macromolecule adaptor activity);GO:0042981(regulation of apoptotic process);GO…	NA	NA	NA	NA	CASP2 and RIPK1 domain containing adaptor with death domain [Source:HGNC Symbol;Acc:HGNC:2340]	protein_coding	1.95109	2.60818	2.55808	2.83808	2.25409	1.07869	2.01141	2.46547	1.79948	3.08924	1.99813	2.40261	176	224	275	243	244	110	211	275	210	326	182	224
ENSSSCG00000000915	chr5	91682658	91714235	+	DCN	396957	ENSSSCT00000083667;ENSSSCT00000089888	GO:0005518(collagen binding);GO:0005539(glycosaminoglycan binding);GO:0005576(extracellular region);GO:0010508(positive regulation of autophagy);GO:0010596(negative regulation of endothelial cell migration);GO:0014068(positive regulation of phosphatidylinositol 3-kinase signaling);GO:0016239(positive regulation of macroautophagy);GO:0016525(negative regulation of angiogenesis);GO:0019800(peptide …	04350(TGF-beta signaling pathway);05205(Proteoglycans in cancer);05205(Proteoglycans in cancer)	NA	NA	NA	decorin [Source:VGNC Symbol;Acc:VGNC:103228]	protein_coding	228.388	166.009	842.394	386.75	341.589	263.549	340.504	429.066	399.077	229.285	131.602	380.081	18345	12707	80952	29580	33003	23984	31957	42702	41501	21636	10703	31693
ENSSSCG00000000916	chr5	91748885	91757598	+	LUM	100152607	ENSSSCT00000001000	GO:0005518(collagen binding);GO:0005576(extracellular region);GO:0005583(fibrillar collagen trimer);GO:0005615(extracellular space);GO:0007601(visual perception);GO:0030021(extracellular matrix structural constituent conferring compression resistance);GO:0030199(collagen fibril organization);GO:0031012(extracellular matrix);GO:0032914(positive regulation of transforming growth factor beta1 produc…	05205(Proteoglycans in cancer)	NA	NA	NA	lumican [Source:VGNC Symbol;Acc:VGNC:89894]	protein_coding	81.203	64.7074	232.039	118.076	115.944	136.683	173.462	206.561	126.562	65.0887	59.4593	130.805	12156	9231	41555	16829	20876	23181	30338	38311	24528	11446	9011	20327
ENSSSCG00000000917	chr5	91796324	91802468	+	KERA	100157843	ENSSSCT00000001001	GO:0005615(extracellular space);GO:0061303(cornea development in camera-type eye)	NA	NA	NA	NA	keratocan [Source:VGNC Symbol;Acc:VGNC:89420]	protein_coding	5.30973	5.35281	30.4242	8.84252	8.74024	6.22302	12.1037	26.4969	15.2815	4.38501	5.21775	9.47994	550	528	3765	871	1088	730	1463	3396	2047	533	547	1018
ENSSSCG00000000918	chr5	91832291	91877982	+	EPYC	100155436	ENSSSCT00000001002	GO:0007605(sensory perception of sound);GO:0031012(extracellular matrix);GO:0060348(bone development);GO:0061975(articular cartilage development)	NA	NA	NA	NA	epiphycan [Source:VGNC Symbol;Acc:VGNC:87755]	protein_coding	0	0	0	0.044572	0.584674	2.4231	0	0.030343	0.111137	0	0	0	0	0	0	5	74	288	0	4	16	0	0	0
ENSSSCG00000000920	chr5	93132018	93222522	+	POC1B	102161501	ENSSSCT00000001004;ENSSSCT00000029579	GO:0000922(spindle pole);GO:0001895(retina homeostasis);GO:0005813(centrosome);GO:0005814(centriole);GO:0007099(centriole replication);GO:0008283(cell population proliferation);GO:0036064(ciliary basal body);GO:0060271(cilium assembly);GO:0060271(cilium assembly)	NA	NA	NA	NA	POC1 centriolar protein B [Source:VGNC Symbol;Acc:VGNC:91616]	protein_coding	4.00979	2.66149	2.31234	3.3079	3.19596	2.7896	2.48651	3.03826	1.92361	3.63687	2.71773	2.07044	591	374	409	465	567	467	429	555	368	631	406	317
ENSSSCG00000000924	chr5	94492267	94521046	+	C12orf50		ENSSSCT00000001009;ENSSSCT00000054043	GO:0003729(mRNA binding);GO:0016973(poly(A)+ mRNA export from nucleus);GO:0016973(poly(A)+ mRNA export from nucleus)	NA	NA	NA	NA	chromosome 5 C12orf50 homolog [Source:VGNC Symbol;Acc:VGNC:86043]	protein_coding	0.337392	0.459027	0.597229	0.266185	0.218671	0.24923	0.150851	0.284058	0.199543	0.262034	0.629227	0.684673	42	54	88	32	33	35	22	44	32	38	79	88
ENSSSCG00000000925	chr5	94473174	94489661	-	C12orf29		ENSSSCT00000046326;ENSSSCT00000001010	GO:0002244(hematopoietic progenitor cell differentiation);GO:0002244(hematopoietic progenitor cell differentiation)	NA	NA	NA	NA	chromosome 5 C12orf29 homolog [Source:VGNC Symbol;Acc:VGNC:86040]	protein_coding	7.93555	9.89594	8.57822	10.9113	10.4517	8.55548	7.43878	7.22294	7.31565	8.1906	6.43743	8.16146	1250	1484	1616	1636	1979	1527	1369	1409	1492	1515	1026	1334
ENSSSCG00000000926	chr5	94384415	94474335	+	CEP290	100155832	ENSSSCT00000001011;ENSSSCT00000061535;ENSSSCT00000091648	GO:0005634(nucleus);GO:0005737(cytoplasm);GO:0005813(centrosome);GO:0005814(centriole);GO:0005829(cytosol);GO:0005856(cytoskeleton);GO:0030030(cell projection organization);GO:0032991(protein-containing complex);GO:0034451(centriolar satellite);GO:0035869(ciliary transition zone);GO:0042802(identical protein binding);GO:0042995(cell projection);GO:0045893(positive regulation of DNA-templated tran…	NA	NA	NA	NA	centrosomal protein 290 [Source:VGNC Symbol;Acc:VGNC:86567]	protein_coding	1.89505	2.83778	1.64921	1.85755	1.77197	2.26875	2.32665	2.13786	2.04359	2.13843	2.25882	2.14427	829	1182	862	773	932	1123	1188	1159	1156	1098	999	973
ENSSSCG00000000927	chr5	94324091	94384154	-	TMTC3	100152211	ENSSSCT00000061331;ENSSSCT00000037954	GO:0000030(mannosyltransferase activity);GO:0004169(dolichyl-phosphate-mannose-protein mannosyltransferase activity);GO:0005783(endoplasmic reticulum);GO:0006486(protein glycosylation);GO:0016020(membrane);GO:0016021(integral component of membrane);GO:0034976(response to endoplasmic reticulum stress);GO:0035269(protein O-linked mannosylation);GO:1901800(positive regulation of proteasomal protein …	NA	NA	NA	NA	transmembrane O-mannosyltransferase targeting cadherins 3 [Source:VGNC Symbol;Acc:VGNC:94243]	protein_coding	2.62412	1.89998	2.95024	3.89869	3.24853	2.03059	2.34248	2.86522	1.47803	2.10494	2.72779	2.19171	406	280	544	573	603	355	422	548	295	382	426	351
ENSSSCG00000000934	chr5	96801327	96993094	-	LRRIQ1	100628126	ENSSSCT00000037986	NA	NA	NA	NA	NA	leucine rich repeats and IQ motif containing 1 [Source:VGNC Symbol;Acc:VGNC:98091]	protein_coding	0.079813	0.047115	0.050799	0.049277	0.039849	0.010966	0.032227	0.043136	0.008718	0.040515	0.018471	0.047549	26	15	20	15	16	4	12	17	4	16	6	16
ENSSSCG00000000936	chr5	97092925	97148602	+	SLC6A15	100628231	ENSSSCT00000001022	GO:0003333(amino acid transmembrane transport);GO:0005298(proline:sodium symporter activity);GO:0005887(integral component of plasma membrane);GO:0006811(ion transport);GO:0006814(sodium ion transport);GO:0006865(amino acid transport);GO:0015293(symporter activity);GO:0015804(neutral amino acid transport);GO:0015820(leucine transport);GO:0015824(proline transport);GO:0016020(membrane);GO:0016021(…	NA	NA	NA	NA	solute carrier family 6 member 15 [Source:VGNC Symbol;Acc:VGNC:93157]	protein_coding	0	0.0241322	0.0133521	0	0	0	0	0	0	0	0	0	0	6	4	0	0	0	0	0	0	0	0	0
ENSSSCG00000000937	chr5	100752890	100755494	-	MYF5	100153269	ENSSSCT00000070997	GO:0000978(RNA polymerase II cis-regulatory region sequence-specific DNA binding);GO:0000981(DNA-binding transcription factor activity, RNA polymerase II-specific);GO:0001228(DNA-binding transcription activator activity, RNA polymerase II-specific);GO:0001502(cartilage condensation);GO:0001503(ossification);GO:0001756(somitogenesis);GO:0001952(regulation of cell-matrix adhesion);GO:0003677(DNA bi…	04550(Signaling pathways regulating pluripotency of stem cells)	NA	NA	bHLH	myogenic factor 5 [Source:VGNC Symbol;Acc:VGNC:90508]	protein_coding	0	0	0	0	0	0	0	0	0	0	0.059824	0	0	0	0	0	0	0	0	0	0	0	4	0
ENSSSCG00000000939	chr5	100279720	100429165	-	ACSS3	100512104	ENSSSCT00000050640;ENSSSCT00000059893;ENSSSCT00000053340	GO:0000166(nucleotide binding);GO:0003987(acetate-CoA ligase activity);GO:0005739(mitochondrion);GO:0005759(mitochondrial matrix);GO:0006629(lipid metabolic process);GO:0016405(CoA-ligase activity);GO:0016878(acid-thiol ligase activity);GO:0043231(intracellular membrane-bounded organelle);GO:0050218(propionate-CoA ligase activity);GO:0050218(propionate-CoA ligase activity)	00640(Propanoate metabolism);01100(Metabolic pathways);01100(Metabolic pathways)	K01908	EC:6.2.1.17	NA	acyl-CoA synthetase short chain family member 3 [Source:VGNC Symbol;Acc:VGNC:85037]	protein_coding	41.2254	41.4344	48.3038	26.4569	29.1116	32.4538	34.1181	48.4028	47.2946	32.403	47.7219	25.5204	9029	8647	12654	5517	7668	8053	8729	13133	13409	8336	10580	5803
ENSSSCG00000000940	chr5	99819430	100279017	+	PPFIA2	100512281	ENSSSCT00000055406;ENSSSCT00000042751	GO:0005737(cytoplasm);GO:0030424(axon);GO:0043197(dendritic spine);GO:0045202(synapse);GO:0048786(presynaptic active zone);GO:0050808(synapse organization);GO:0060998(regulation of dendritic spine development);GO:0061001(regulation of dendritic spine morphogenesis);GO:0099519(dense core granule cytoskeletal transport);GO:0099519(dense core granule cytoskeletal transport)	NA	NA	NA	NA	PTPRF interacting protein alpha 2 [Source:VGNC Symbol;Acc:VGNC:91692]	protein_coding	0.962433	0.85744	0.667895	0.405309	0.385451	0.797932	0.589241	0.691489	0.696272	0.580164	0.958114	0.610036	288	244	239	116	139	270	206	256	269	204	290	189
ENSSSCG00000000941	chr5	99227750	99358587	-	METTL25	100512658	ENSSSCT00000077660;ENSSSCT00000091491;ENSSSCT00000057847;ENSSSCT00000043327;ENSSSCT00000038923;ENSSSCT00000001030;ENSSSCT00000076202;ENSSSCT00000001029	GO:0008168(methyltransferase activity);GO:0016740(transferase activity);GO:0032259(methylation);GO:0032259(methylation)	NA	NA	NA	NA	methyltransferase like 25 [Source:VGNC Symbol;Acc:VGNC:90162]	protein_coding	1.16111	1.18474	0.88936	1.33444	1.14233	1.42696	0.906584	0.888975	0.841287	1.37106	1.05076	0.940715	684	665	625	748	807	951	624	647	639	946	626	574
ENSSSCG00000000943	chr5	101100282	101251884	-	OTOGL	100513796	ENSSSCT00000001032	GO:0005615(extracellular space);GO:0007605(sensory perception of sound);GO:0031012(extracellular matrix);GO:0046373(L-arabinose metabolic process);GO:0046556(alpha-L-arabinofuranosidase activity)	NA	NA	NA	NA	otogelin like [Source:VGNC Symbol;Acc:VGNC:91091]	protein_coding	0	0	0	0	0.029883	0.014997	0	0	0	0	0.019432	0	0	0	0	0	14	7	0	0	0	0	8	0
ENSSSCG00000000948	chr5	101871314	102215581	-	SYT1	100513599	ENSSSCT00000001037	GO:0000149(SNARE binding);GO:0001786(phosphatidylserine binding);GO:0005509(calcium ion binding);GO:0005544(calcium-dependent phospholipid binding);GO:0005737(cytoplasm);GO:0005794(Golgi apparatus);GO:0005886(plasma membrane);GO:0007269(neurotransmitter secretion);GO:0008021(synaptic vesicle);GO:0014059(regulation of dopamine secretion);GO:0016020(membrane);GO:0016021(integral component of membra…	04721(Synaptic vesicle cycle)	NA	NA	NA	synaptotagmin 1 [Source:VGNC Symbol;Acc:VGNC:93678]	protein_coding	0.444564	0.668209	0.038884	0.243292	0.389932	0.346468	0.367125	0.284197	0.20332	0.604028	0.150593	0.148438	88	126	10	46	93	78	85	70	52	140	30	31
ENSSSCG00000000950	chr5	104127731	104163212	+	E2F7	100154851	ENSSSCT00000083942;ENSSSCT00000078119	GO:0000122(negative regulation of transcription by RNA polymerase II);GO:0000977(RNA polymerase II transcription regulatory region sequence-specific DNA binding);GO:0000978(RNA polymerase II cis-regulatory region sequence-specific DNA binding);GO:0000987(cis-regulatory region sequence-specific DNA binding);GO:0001217(DNA-binding transcription repressor activity);GO:0001227(DNA-binding transcripti…	NA	NA	NA	E2F	E2F transcription factor 7 [Source:VGNC Symbol;Acc:VGNC:87518]	protein_coding	0.113203	0.260319	0.316962	0.316684	0.215055	0.166182	0.167036	0.383469	0.327427	0.062306	0.089409	0.479881	30	66	100	79	69	50	52	126	112	20	24	131
ENSSSCG00000000951	chr5	104273168	104295141	+	CSRP2	100153630	ENSSSCT00000081503;ENSSSCT00000096521;ENSSSCT00000090556;ENSSSCT00000001040;ENSSSCT00000084474	GO:0005634(nucleus);GO:0005737(cytoplasm);GO:0008307(structural constituent of muscle);GO:0030018(Z disc);GO:0030036(actin cytoskeleton organization);GO:0042805(actinin binding);GO:0045214(sarcomere organization);GO:0046872(metal ion binding);GO:0060537(muscle tissue development);GO:0060537(muscle tissue development)	NA	NA	NA	NA	cysteine and glycine rich protein 2 [Source:VGNC Symbol;Acc:VGNC:103226]	protein_coding	10.8533	5.26728	4.98096	4.01462	3.69013	2.4901	5.70974	6.12663	5.41348	3.58383	5.14712	4.11053	779	361	429	276	320	204	479	545	503	303	374	307
ENSSSCG00000000952	chr5	104300876	104394260	-	ZDHHC17	100514712	ENSSSCT00000042307	GO:0000139(Golgi membrane);GO:0005794(Golgi apparatus);GO:0015095(magnesium ion transmembrane transporter activity);GO:0016020(membrane);GO:0016021(integral component of membrane);GO:0016235(aggresome);GO:0016409(palmitoyltransferase activity);GO:0016740(transferase activity);GO:0016746(acyltransferase activity);GO:0018345(protein palmitoylation);GO:0019706(protein-cysteine S-palmitoyltransferase…	NA	K20032	EC:2.3.1.225	NA	zinc finger DHHC-type palmitoyltransferase 17 [Source:VGNC Symbol;Acc:VGNC:95119]	protein_coding	11.2264	10.5217	8.90984	11.6908	11.4702	9.26926	8.33686	9.0514	7.80299	9.92987	8.80075	10.3734	2581	2305	2450	2559	3171	2414	2239	2578	2322	2681	2048	2475
ENSSSCG00000000955	chr5	2528921	2787304	-	TBC1D22A	100625790	ENSSSCT00000001044;ENSSSCT00000083688	GO:0005096(GTPase activator activity);GO:0042803(protein homodimerization activity);GO:0071889(14-3-3 protein binding);GO:0090630(activation of GTPase activity);GO:0090630(activation of GTPase activity)	NA	NA	NA	NA	TBC1 domain family member 22A [Source:VGNC Symbol;Acc:VGNC:93770]	protein_coding	12.4158	12.5973	14.0155	14.9163	15.6457	13.6138	13.2391	12.2473	12.966	17.1236	12.4546	13.8125	1830	1769	2471	2093	2773	2273	2280	2237	2474	2965	1859	2113
ENSSSCG00000000958	chr5	32047643	32064222	+	DYRK2	100515779	ENSSSCT00000055554	GO:0000151(ubiquitin ligase complex);GO:0000166(nucleotide binding);GO:0000287(magnesium ion binding);GO:0004672(protein kinase activity);GO:0004674(protein serine/threonine kinase activity);GO:0004712(protein serine/threonine/tyrosine kinase activity);GO:0004713(protein tyrosine kinase activity);GO:0005524(ATP binding);GO:0005634(nucleus);GO:0005654(nucleoplasm);GO:0005737(cytoplasm);GO:0005829(…	NA	K18669	EC:2.7.12.1	NA	dual specificity tyrosine phosphorylation regulated kinase 2 [Source:VGNC Symbol;Acc:VGNC:87507]	protein_coding	4.1347	3.17027	4.16763	4.766	4.50781	2.8506	4.19277	3.76788	3.31605	3.05211	2.11293	3.81655	1712	1251	2064	1879	2245	1337	2028	1933	1777	1484	886	1640
ENSSSCG00000000964	chr5	233401	238266	+	LMF2	100518488	ENSSSCT00000001054;ENSSSCT00000046379	GO:0005783(endoplasmic reticulum);GO:0005789(endoplasmic reticulum membrane);GO:0016020(membrane);GO:0016021(integral component of membrane);GO:0051604(protein maturation);GO:0051604(protein maturation)	NA	NA	NA	NA	lipase maturation factor 2 [Source:VGNC Symbol;Acc:VGNC:89758]	protein_coding	34.3078	34.6909	40.9207	43.4433	39.9761	32.0443	32.3733	38.71	35.533	44.448	37.3362	42.6733	4738	4565	6760	5712	6639	5014	5223	6623	6353	7210	5220	6118
ENSSSCG00000000965	chr5	221471	233475	-	NCAPH2	100518196	ENSSSCT00000001055	GO:0000793(condensed chromosome);GO:0000794(condensed nuclear chromosome);GO:0000796(condensin complex);GO:0003682(chromatin binding);GO:0005634(nucleus);GO:0005654(nucleoplasm);GO:0005694(chromosome);GO:0007076(mitotic chromosome condensation);GO:0007143(female meiotic nuclear division);GO:0010032(meiotic chromosome condensation);GO:0030054(cell junction);GO:0030261(chromosome condensation);GO:0…	NA	NA	NA	NA	non-SMC condensin II complex subunit H2 [Source:VGNC Symbol;Acc:VGNC:90602]	protein_coding	8.86903	8.05556	9.02304	10.8008	10.3104	9.2861	7.3707	9.39928	7.91163	9.50504	9.69119	8.91487	1433	1241	1744	1662	2004	1700	1392	1882	1655	1804	1586	1496
ENSSSCG00000000967	chr5	215967	217974	+	ODF3B	100517096	ENSSSCT00000082459;ENSSSCT00000001057	GO:0005856(cytoskeleton);GO:0005856(cytoskeleton)	NA	NA	NA	NA	outer dense fiber of sperm tails 3B [Source:VGNC Symbol;Acc:VGNC:107163]	protein_coding	0.165722	0	0	0	0	0	0	0	0	0.175848	0.481328	0	8	0	0	0	0	0	0	0	0	10	23	0
ENSSSCG00000000968	chr5	260935	284509	+	SBF1	100518017	ENSSSCT00000060312;ENSSSCT00000001058;ENSSSCT00000037842	GO:0005085(guanyl-nucleotide exchange factor activity);GO:0005737(cytoplasm);GO:0007283(spermatogenesis);GO:0016604(nuclear body);GO:0019208(phosphatase regulator activity);GO:0043087(regulation of GTPase activity);GO:0043087(regulation of GTPase activity)	NA	NA	NA	NA	SET binding factor 1 [Source:VGNC Symbol;Acc:VGNC:92593]	protein_coding	18.5571	18.78	17.821	21.8591	20.2658	19.1468	16.6766	15.6536	17.7911	18.5455	16.9668	18.8777	7400	7136	8502	8299	9720	8650	7769	7734	9185	8688	6849	7815
ENSSSCG00000000970	chr5	285388	361301	-	PPP6R2	100517282	ENSSSCT00000094835;ENSSSCT00000052570;ENSSSCT00000104993;ENSSSCT00000001060	GO:0005634(nucleus);GO:0005829(cytosol);GO:0019888(protein phosphatase regulator activity);GO:0019903(protein phosphatase binding);GO:0043231(intracellular membrane-bounded organelle);GO:0043666(regulation of phosphoprotein phosphatase activity);GO:0043666(regulation of phosphoprotein phosphatase activity)	NA	NA	NA	NA	protein phosphatase 6 regulatory subunit 2 [Source:VGNC Symbol;Acc:VGNC:91761]	protein_coding	39.3736	42.1181	26.3507	41.3256	41.5564	31.6812	33.0103	29.0434	33.7601	37.2281	31.092	37.9293	8059	8217	6455	8055	10232	7349	7895	7367	8948	8953	6444	8061
ENSSSCG00000000971	chr5	439849	445334	+	HDAC10	100518786	ENSSSCT00000030674;ENSSSCT00000001061;ENSSSCT00000029634;ENSSSCT00000054587;ENSSSCT00000081871	GO:0000118(histone deacetylase complex);GO:0000122(negative regulation of transcription by RNA polymerase II);GO:0004407(histone deacetylase activity);GO:0005634(nucleus);GO:0005654(nucleoplasm);GO:0005737(cytoplasm);GO:0006355(regulation of DNA-templated transcription);GO:0006476(protein deacetylation);GO:0016236(macroautophagy);GO:0016575(histone deacetylation);GO:0016787(hydrolase activity);GO…	05034(Alcoholism);05203(Viral carcinogenesis);05203(Viral carcinogenesis)	K18671	EC:3.5.1.98	NA	histone deacetylase 10 [Source:VGNC Symbol;Acc:VGNC:88811]	protein_coding	14.9276	17.7144	18.6392	21.1085	19.5317	13.7421	15.4619	13.4373	15.1783	20.2679	16.3073	17.7758	2019	2284	3017	2719	3179	2107	2445	2254	2659	3221	2234	2497
ENSSSCG00000000972	chr5	445525	470548	+	TUBGCP6	100519661	ENSSSCT00000001062;ENSSSCT00000097473;ENSSSCT00000099975	GO:0000226(microtubule cytoskeleton organization);GO:0000278(mitotic cell cycle);GO:0000922(spindle pole);GO:0000923(equatorial microtubule organizing center);GO:0000930(gamma-tubulin complex);GO:0000931(gamma-tubulin ring complex);GO:0005737(cytoplasm);GO:0005813(centrosome);GO:0005815(microtubule organizing center);GO:0007020(microtubule nucleation);GO:0008017(microtubule binding);GO:0008275(ga…	NA	NA	NA	NA	tubulin gamma complex associated protein 6 [Source:VGNC Symbol;Acc:VGNC:94587]	protein_coding	6.20653	7.78322	5.40505	8.06402	8.51753	6.76391	6.73859	5.17175	5.80125	7.63435	6.43649	7.66427	2630	3142	2740	3253	4340	3247	3336	2715	3183	3800	2761	3371
ENSSSCG00000000973	chr5	467547	481230	-	SELENOO	100518971	ENSSSCT00000081463	GO:0000166(nucleotide binding);GO:0005524(ATP binding);GO:0005694(chromosome);GO:0005739(mitochondrion);GO:0016740(transferase activity);GO:0016779(nucleotidyltransferase activity);GO:0018117(protein adenylylation);GO:0046872(metal ion binding);GO:0070733(protein adenylyltransferase activity)	NA	NA	NA	NA	selenoprotein O [Source:NCBI gene (formerly Entrezgene);Acc:100518971]	protein_coding	19.225	18.5911	15.9987	13.0688	15.3304	19.6731	19.5891	19.024	19.2226	17.7358	26.0189	21.6502	2104	1939	2095	1362	2018	2440	2505	2580	2724	2280	2883	2460
ENSSSCG00000000974	chr5	485475	494534	-	TRABD	100519151	ENSSSCT00000061499;ENSSSCT00000001064	NA	NA	NA	NA	NA	TraB domain containing [Source:VGNC Symbol;Acc:VGNC:94355]	protein_coding	22.7554	22.3488	19.704	22.5256	25.0416	24.5601	23.4156	24.5521	22.5506	25.27	22.8329	25.6267	2282	2136	2364	2151	3020	2790	2744	3051	2927	2977	2319	2667
ENSSSCG00000000975	chr5	497385	506013	-	PANX2	100519315	ENSSSCT00000001065	GO:0002931(response to ischemia);GO:0005737(cytoplasm);GO:0005886(plasma membrane);GO:0005921(gap junction);GO:0006811(ion transport);GO:0006812(cation transport);GO:0007267(cell-cell signaling);GO:0015267(channel activity);GO:0016020(membrane);GO:0016021(integral component of membrane);GO:0022829(wide pore channel activity);GO:0030054(cell junction);GO:0032732(positive regulation of interleukin-…	NA	NA	NA	NA	pannexin 2 [Source:VGNC Symbol;Acc:VGNC:91167]	protein_coding	3.75722	5.80919	3.83793	2.12902	2.69773	4.09952	2.64594	2.14161	1.54236	1.21671	3.03664	2.72534	526	775	643	284	454	650	433	372	280	200	431	396
ENSSSCG00000000980	chr5	717028	729397	+	ALG12	100520494	ENSSSCT00000001070	GO:0000009(alpha-1,6-mannosyltransferase activity);GO:0000030(mannosyltransferase activity);GO:0005783(endoplasmic reticulum);GO:0005788(endoplasmic reticulum lumen);GO:0005789(endoplasmic reticulum membrane);GO:0006486(protein glycosylation);GO:0006487(protein N-linked glycosylation);GO:0006488(dolichol-linked oligosaccharide biosynthetic process);GO:0016020(membrane);GO:0016021(integral compone…	00510(N-Glycan biosynthesis);00513(Various types of N-glycan biosynthesis);01100(Metabolic pathways)	K03847	EC:2.4.1.260	NA	ALG12 alpha-1,6-mannosyltransferase [Source:VGNC Symbol;Acc:VGNC:85248]	protein_coding	7.9967	10.3173	8.5557	9.41384	8.69791	7.11729	8.21991	7.50085	6.69415	9.79926	9.73945	9.31694	1575	1936	2016	1765	2060	1588	1892	1830	1707	2267	1942	1905
ENSSSCG00000000981	chr5	709045	716771	-	CRELD2	100520025	ENSSSCT00000001071	GO:0003756(protein disulfide isomerase activity);GO:0005509(calcium ion binding);GO:0005615(extracellular space);GO:0005783(endoplasmic reticulum);GO:0005794(Golgi apparatus);GO:0016853(isomerase activity)	NA	K24335	EC:5.3.4.1	NA	cysteine rich with EGF like domains 2 [Source:VGNC Symbol;Acc:VGNC:97942]	protein_coding	12.4228	13.7848	11.8383	8.76726	9.87861	12.7344	11.162	13.5206	16.802	13.0646	15.0905	11.6121	873	923	995	587	835	1014	916	1177	1528	1078	1073	847
ENSSSCG00000000982	chr5	602886	629882	+	TTLL8	100520675	ENSSSCT00000001072	GO:0005929(cilium);GO:0005930(axoneme);GO:0015630(microtubule cytoskeleton);GO:0018094(protein polyglycylation);GO:0030317(flagellated sperm motility);GO:0036126(sperm flagellum);GO:0060271(cilium assembly);GO:0070735(protein-glycine ligase activity);GO:0070736(protein-glycine ligase activity, initiating)	NA	NA	NA	NA	tubulin tyrosine ligase like 8 [Source:VGNC Symbol;Acc:VGNC:94572]	protein_coding	0.031412	0.346858	0.180827	0.15416	0.146973	0	0.020214	0.121421	0.19875	0.220252	0.047589	0.417134	4	38	25	17	20	0	3	17	30	30	6	49
ENSSSCG00000000983	chr5	646879	664018	+	ENSSSCG00000000983		ENSSSCT00000069878;ENSSSCT00000001073	GO:0005886(plasma membrane);GO:0016020(membrane);GO:0019221(cytokine-mediated signaling pathway);GO:0030368(interleukin-17 receptor activity);GO:0030368(interleukin-17 receptor activity)	NA	NA	NA	NA	interleukin 17 receptor E like [Source:VGNC Symbol;Acc:VGNC:89088]	protein_coding	0.168045	0.312152	0.605511	0.114065	0.0404545	0.0960258	0.205997	0.19745	0.125436	0.169024	0.0247907	0.216252	49	86	208	32	14	32	69	70	47	57	8	66
ENSSSCG00000000985	chr7	195083	341442	-	EXOC2	100520314	ENSSSCT00000039925;ENSSSCT00000037243;ENSSSCT00000045520;ENSSSCT00000060445	GO:0000145(exocyst);GO:0006887(exocytosis);GO:0006893(Golgi to plasma membrane transport);GO:0006904(vesicle docking involved in exocytosis);GO:0015031(protein transport);GO:0019901(protein kinase binding);GO:0031267(small GTPase binding);GO:0047485(protein N-terminus binding);GO:2000535(regulation of entry of bacterium into host cell);GO:2000535(regulation of entry of bacterium into host cell)	04014(Ras signaling pathway);05132(Salmonella infection);05132(Salmonella infection)	NA	NA	NA	exocyst complex component 2 [Source:VGNC Symbol;Acc:VGNC:87825]	protein_coding	28.5747	29.8026	25.5559	23.6979	24.3916	22.9163	25.8006	23.7844	25.7577	29.8075	20.6415	27.8126	9436	9378	10097	7451	9688	8574	9954	9732	11011	11564	6901	9534
ENSSSCG00000000991	chr7	664373	665563	+	FOXQ1	100152843	ENSSSCT00000001081	GO:0000122(negative regulation of transcription by RNA polymerase II);GO:0000978(RNA polymerase II cis-regulatory region sequence-specific DNA binding);GO:0000981(DNA-binding transcription factor activity, RNA polymerase II-specific);GO:0001227(DNA-binding transcription repressor activity, RNA polymerase II-specific);GO:0003677(DNA binding);GO:0003700(DNA-binding transcription factor activity);GO…	NA	NA	NA	Fork_head	forkhead box Q1 [Source:VGNC Symbol;Acc:VGNC:88225]	protein_coding	0	0	0.058532	0	0	0	0	0	0	0	0	0.054553	0	0	4	0	0	0	0	0	0	0	0	4
ENSSSCG00000000994	chr7	752592	1285544	-	GMDS	100520846	ENSSSCT00000091101;ENSSSCT00000001084;ENSSSCT00000041755	GO:0005575(cellular_component);GO:0005737(cytoplasm);GO:0007219(Notch signaling pathway);GO:0008446(GDP-mannose 4,6-dehydratase activity);GO:0019673(GDP-mannose metabolic process);GO:0042350(GDP-L-fucose biosynthetic process);GO:0042351('de novo' GDP-L-fucose biosynthetic process);GO:0042802(identical protein binding);GO:0070401(NADP+ binding);GO:0070401(NADP+ binding)	00051(Fructose and mannose metabolism);00520(Amino sugar and nucleotide sugar metabolism);01100(Metabolic pathways);01100(Metabolic pathways)	K01711	EC:4.2.1.47	NA	GDP-mannose 4,6-dehydratase [Source:VGNC Symbol;Acc:VGNC:88507]	protein_coding	13.9928	11.2152	15.7988	10.9615	10.4521	11.698	9.4918	10.5591	12.4448	10.9864	15.669	14.4112	1707	1304	2307	1273	1534	1617	1353	1596	1966	1575	1936	1825
ENSSSCG00000000997	chr7	3051149	3052210	+	PPP1R3G	100522260	ENSSSCT00000001087	GO:0000164(protein phosphatase type 1 complex);GO:0005737(cytoplasm);GO:0005978(glycogen biosynthetic process);GO:0005979(regulation of glycogen biosynthetic process);GO:0008157(protein phosphatase 1 binding);GO:0019903(protein phosphatase binding);GO:0042593(glucose homeostasis);GO:0045725(positive regulation of glycogen biosynthetic process);GO:2000467(positive regulation of glycogen (starch) s…	NA	NA	NA	NA	protein phosphatase 1 regulatory subunit 3G [Source:VGNC Symbol;Acc:VGNC:91740]	protein_coding	0.21399	0.319691	0.405302	0.962896	0.760054	0.574992	0.314873	0.191422	0.199887	0.301734	0.499769	0.254618	11	16	25	47	47	33	19	13	14	18	26	14
ENSSSCG00000000998	chr7	2987271	3005271	-	RPP40	110255215	ENSSSCT00000045450;ENSSSCT00000062482;ENSSSCT00000072211;ENSSSCT00000001088	GO:0000171(ribonuclease MRP activity);GO:0000172(ribonuclease MRP complex);GO:0000447(endonucleolytic cleavage in ITS1 to separate SSU-rRNA from 5.8S rRNA and LSU-rRNA from tricistronic rRNA transcript (SSU-rRNA, 5.8S rRNA, LSU-rRNA));GO:0001682(tRNA 5'-leader removal);GO:0004526(ribonuclease P activity);GO:0030677(ribonuclease P complex);GO:0030681(multimeric ribonuclease P complex);GO:0033204(r…	03008(Ribosome biogenesis in eukaryotes);03013(RNA transport);03013(RNA transport)	K14530	EC:3.1.26.5	NA	ribonuclease P/MRP subunit p40 [Source:VGNC Symbol;Acc:VGNC:92434]	protein_coding	2.1552	2.6539	2.07423	2.4352	2.5635	2.63383	3.04868	2.99031	2.99603	2.90792	3.52746	2.5537	738	866	849	794	1056	1021	1219	1267	1327	1169	1221	907
ENSSSCG00000000999	chr7	2846090	2966240	+	CDYL	100155291	ENSSSCT00000001090	GO:0003682(chromatin binding);GO:0003714(transcription corepressor activity);GO:0003824(catalytic activity);GO:0005634(nucleus);GO:0005694(chromosome);GO:0005737(cytoplasm);GO:0007286(spermatid development);GO:0016607(nuclear speck);GO:0030674(protein-macromolecule adaptor activity);GO:0035064(methylated histone binding);GO:0045892(negative regulation of DNA-templated transcription);GO:0060816(ra…	NA	K00653	EC:2.3.1.48	NA	chromodomain Y like [Source:HGNC Symbol;Acc:HGNC:1811]	protein_coding	4.88737	4.90454	6.39501	8.4904	7.26869	5.43769	7.33616	8.11322	5.32483	6.17952	5.79436	5.36945	470	449	735	777	840	592	824	966	663	698	564	536
ENSSSCG00000001000	chr7	2421054	2446319	-	ECI2	100134957	ENSSSCT00000001092	GO:0000062(fatty-acyl-CoA binding);GO:0003824(catalytic activity);GO:0004165(delta(3)-delta(2)-enoyl-CoA isomerase activity);GO:0005739(mitochondrion);GO:0005777(peroxisome);GO:0006631(fatty acid metabolic process);GO:0043231(intracellular membrane-bounded organelle)	00071(Fatty acid degradation);04146(Peroxisome)	K13239	EC:5.3.3.8	NA	enoyl-CoA delta isomerase 2 [Source:VGNC Symbol;Acc:VGNC:87532]	protein_coding	20.72	26.1595	18.6206	20.0968	21.1879	24.0087	30.5272	33.0484	36.579	29.2655	49.9556	33.8731	5830	7014	6269	5385	7171	7654	10036	11522	13325	9674	14231	9895
ENSSSCG00000001001	chr7	2419517	2426946	+	ENSSSCG00000001001		ENSSSCT00000044802	GO:0003676(nucleic acid binding)	NA	NA	NA	NA		protein_coding	0.335592	0.437554	0.187802	0.43145	0.069136	0.277839	0.342587	0.252728	0.786393	1.03805	0.405561	0.677634	17	21	12	21	5	16	20	16	51	61	21	35
ENSSSCG00000001002	chr7	2382495	2412908	+	PRPF4B	100157287	ENSSSCT00000058729;ENSSSCT00000001094;ENSSSCT00000044423	GO:0000166(nucleotide binding);GO:0004672(protein kinase activity);GO:0004674(protein serine/threonine kinase activity);GO:0005524(ATP binding);GO:0005634(nucleus);GO:0005694(chromosome);GO:0006468(protein phosphorylation);GO:0016301(kinase activity);GO:0016310(phosphorylation);GO:0016607(nuclear speck);GO:0016740(transferase activity);GO:0045292(mRNA cis splicing, via spliceosome);GO:0071013(cat…	NA	K08827	EC:2.7.11.1	NA	pre-mRNA processing factor 4B [Source:VGNC Symbol;Acc:VGNC:91845]	protein_coding	16.7517	16.7176	16.4286	17.0141	15.2691	13.0228	12.6375	13.6725	14.5699	12.8098	12.2749	14.5422	3561	3387	4177	3443	3904	3136	3139	3601	4009	3199	2642	3209
ENSSSCG00000001004	chr7	1988696	2131908	-	SLC22A23	100152838	ENSSSCT00000001096;ENSSSCT00000060595	GO:0016020(membrane);GO:0016021(integral component of membrane);GO:0022857(transmembrane transporter activity);GO:0055085(transmembrane transport);GO:0055085(transmembrane transport)	NA	NA	NA	NA	solute carrier family 22 member 23 [Source:HGNC Symbol;Acc:HGNC:21106]	protein_coding	0.295234	0.149741	0.797386	0.206768	0.429971	0.260123	0.201404	0.342802	0.226497	0.192948	0.26384	0.234221	73	35	234	49	127	73	58	105	72	56	66	60
ENSSSCG00000001008	chr7	1882720	1909854	+	BPHL	100154272	ENSSSCT00000001100;ENSSSCT00000088760	GO:0005739(mitochondrion);GO:0047658(alpha-amino-acid esterase activity);GO:0047658(alpha-amino-acid esterase activity)	NA	NA	NA	NA	biphenyl hydrolase like [Source:VGNC Symbol;Acc:VGNC:85864]	protein_coding	44.3441	38.659	56.2092	33.7106	35.6008	44.8972	38.7466	37.7873	47.0807	44.8638	30.9034	45.9746	3487	2896	5287	2524	3367	4000	3560	3682	4793	4144	2460	3753
ENSSSCG00000001009	chr7	1841239	1879765	+	RIPK1	100524751	ENSSSCT00000037817;ENSSSCT00000055582;ENSSSCT00000001101	GO:0000165(MAPK cascade);GO:0001934(positive regulation of protein phosphorylation);GO:0004672(protein kinase activity);GO:0004674(protein serine/threonine kinase activity);GO:0004706(JUN kinase kinase kinase activity);GO:0005123(death receptor binding);GO:0005524(ATP binding);GO:0005739(mitochondrion);GO:0006468(protein phosphorylation);GO:0006915(apoptotic process);GO:0007165(signal transductio…	04064(NF-kappa B signaling pathway);04210(Apoptosis);04217(Necroptosis);04620(Toll-like receptor signaling pathway);04621(NOD-like receptor signaling pathway);04622(RIG-I-like receptor signaling pathway);04623(Cytosolic DNA-sensing pathway);04668(TNF signaling pathway);05132(Salmonella infection);05160(Hepatitis C);05163(Human cytomegalovirus infection);05169(Epstein-Barr virus infection);05170(H…	K02861	EC:2.7.11.1	NA	receptor interacting serine/threonine kinase 1 [Source:VGNC Symbol;Acc:VGNC:92319]	protein_coding	7.63302	7.26464	7.31548	10.8402	9.8947	7.54827	7.21039	5.64796	6.13333	7.37286	6.39586	7.68721	3070	2784	3520	4150	4786	3440	3388	2815	3193	3483	2605	3209
ENSSSCG00000001010	chr7	1656984	1667879	+	WRNIP1	100155921	ENSSSCT00000001102	GO:0000731(DNA synthesis involved in DNA repair);GO:0000781(chromosome, telomeric region);GO:0003677(DNA binding);GO:0005524(ATP binding);GO:0005634(nucleus);GO:0006260(DNA replication);GO:0006261(DNA-templated DNA replication);GO:0006281(DNA repair);GO:0006282(regulation of DNA repair);GO:0006974(cellular response to DNA damage stimulus);GO:0008047(enzyme activator activity);GO:0016887(ATP hydro…	NA	NA	NA	NA	WRN helicase interacting protein 1 [Source:VGNC Symbol;Acc:VGNC:104096]	protein_coding	27.8151	27.8336	24.8528	26.0556	28.7655	25.5507	26.4516	25.2695	26.3914	28.115	22.3639	27.5029	3402	3244	3637	3035	4232	3541	3780	3830	4179	4040	2769	3492
ENSSSCG00000001011	chr7	1684215	1693299	-	SERPINB1	100155145	ENSSSCT00000001103;ENSSSCT00000094034	GO:0004867(serine-type endopeptidase inhibitor activity);GO:0005576(extracellular region);GO:0005615(extracellular space);GO:0010466(negative regulation of peptidase activity);GO:0010951(negative regulation of endopeptidase activity);GO:0030414(peptidase inhibitor activity);GO:0032691(negative regulation of interleukin-1 beta production);GO:0036464(cytoplasmic ribonucleoprotein granule);GO:004434…	NA	NA	NA	NA	serpin family B member 1 [Source:HGNC Symbol;Acc:HGNC:3311]	protein_coding	18.8845	16.3018	13.9006	11.229	11.5958	13.0403	15.2629	13.6631	10.3781	12.8121	10.0832	9.96406	2118	1743	1866	1200	1565	1657	2000	1899	1507	1689	1145	1161
ENSSSCG00000001021	chr7	4621853	4638176	+	ENSSSCG00000001021		ENSSSCT00000001114	GO:0000978(RNA polymerase II cis-regulatory region sequence-specific DNA binding);GO:0001228(DNA-binding transcription activator activity, RNA polymerase II-specific);GO:0005634(nucleus);GO:0006357(regulation of transcription by RNA polymerase II);GO:0045944(positive regulation of transcription by RNA polymerase II)	NA	NA	NA	zf-C2H2	ras responsive element binding protein 1 [Source:VGNC Symbol;Acc:VGNC:92459]	protein_coding	5.27154	5.23391	6.08008	11.6057	9.78866	4.0217	6.32834	6.64741	5.66751	8.39564	5.36168	3.56407	535	506	738	1120	1194	462	750	835	744	1000	551	375
ENSSSCG00000001022	chr7	4652921	4685901	-	SSR1	100152689	ENSSSCT00000072679;ENSSSCT00000074161;ENSSSCT00000001115	GO:0005783(endoplasmic reticulum);GO:0005789(endoplasmic reticulum membrane);GO:0016020(membrane);GO:0016021(integral component of membrane);GO:0016021(integral component of membrane)	04141(Protein processing in endoplasmic reticulum);04141(Protein processing in endoplasmic reticulum)	NA	NA	NA	signal sequence receptor subunit 1 [Source:VGNC Symbol;Acc:VGNC:93490]	protein_coding	23.8849	19.2345	28.3018	22.1254	22.025	21.2945	23.1486	28.5597	21.5919	18.2318	29.7936	17.9977	8391	6438	11894	7401	9305	8475	9501	12429	9819	7523	10595	6564
ENSSSCG00000001024	chr7	4750752	4782448	+	RIOK1	100157926	ENSSSCT00000047114	GO:0000166(nucleotide binding);GO:0004674(protein serine/threonine kinase activity);GO:0004712(protein serine/threonine/tyrosine kinase activity);GO:0005524(ATP binding);GO:0005737(cytoplasm);GO:0005829(cytosol);GO:0016301(kinase activity);GO:0016310(phosphorylation);GO:0016740(transferase activity);GO:0016787(hydrolase activity);GO:0030490(maturation of SSU-rRNA);GO:0030688(preribosome, small su…	03008(Ribosome biogenesis in eukaryotes)	K07178	EC:2.7.11.1	NA	RIO kinase 1 [Source:VGNC Symbol;Acc:VGNC:92315]	protein_coding	2.21251	2.07095	2.05798	3.04272	2.13527	1.73434	2.49441	2.13238	2.0131	1.99988	1.36562	1.95983	852	760	949	1116	990	757	1123	1018	1004	905	533	784
ENSSSCG00000001025	chr7	4862649	4915623	+	DSP	100156744,1834	ENSSSCT00000063188;ENSSSCT00000001118	GO:0001533(cornified envelope);GO:0002934(desmosome organization);GO:0003223(ventricular compact myocardium morphogenesis);GO:0005080(protein kinase C binding);GO:0005198(structural molecule activity);GO:0005737(cytoplasm);GO:0005856(cytoskeleton);GO:0005882(intermediate filament);GO:0005886(plasma membrane);GO:0005911(cell-cell junction);GO:0014704(intercalated disc);GO:0016020(membrane);GO:0016…	05412(Arrhythmogenic right ventricular cardiomyopathy);05412(Arrhythmogenic right ventricular cardiomyopathy)	NA	NA	NA	desmoplakin [Source:VGNC Symbol;Acc:VGNC:87459]	protein_coding	0.527178	0.135586	1.37426	0.0445051	0.0357109	0	0.0392074	0.131913	0.0321737	0	0.0477824	0.0206467	244	60	761	20	20	0	22	77	20	0	24	10
ENSSSCG00000001027	chr7	5058817	5210270	+	BMP6	100155536	ENSSSCT00000001120	GO:0000122(negative regulation of transcription by RNA polymerase II);GO:0001649(osteoblast differentiation);GO:0001654(eye development);GO:0001822(kidney development);GO:0001938(positive regulation of endothelial cell proliferation);GO:0001958(endochondral ossification);GO:0003323(type B pancreatic cell development);GO:0005576(extracellular region);GO:0006879(cellular iron ion homeostasis);GO:00…	04060(Cytokine-cytokine receptor interaction);04350(TGF-beta signaling pathway);04390(Hippo signaling pathway);04913(Ovarian steroidogenesis)	NA	NA	NA	bone morphotic protein 6 [Source:VGNC Symbol;Acc:VGNC:85845]	protein_coding	8.83254	7.98686	3.57247	12.3632	10.6555	6.5553	7.40051	5.22717	6.25618	9.73489	6.11583	6.67952	1282	1105	621	1708	1860	1078	1255	940	1175	1659	899	1006
ENSSSCG00000001033	chr7	5579152	5606531	-	SLC35B3	100157111	ENSSSCT00000001126;ENSSSCT00000049112	GO:0016020(membrane);GO:0016021(integral component of membrane);GO:0022857(transmembrane transporter activity);GO:0030173(integral component of Golgi membrane);GO:0030176(integral component of endoplasmic reticulum membrane);GO:0046964(3'-phosphoadenosine 5'-phosphosulfate transmembrane transporter activity);GO:0055085(transmembrane transport);GO:1902559(3'-phospho-5'-adenylyl sulfate transmembra…	NA	NA	NA	NA	solute carrier family 35 member B3 [Source:VGNC Symbol;Acc:VGNC:93073]	protein_coding	2.78554	2.61507	3.14021	4.72104	4.629	2.22839	2.9538	2.8624	2.59209	2.85318	2.27656	3.09004	707	632	952	1139	1412	640	876	900	851	851	585	813
ENSSSCG00000001036	chr7	7221656	7239994	-	TFAP2A	100049668	ENSSSCT00000072017	GO:0000977(RNA polymerase II transcription regulatory region sequence-specific DNA binding);GO:0000981(DNA-binding transcription factor activity, RNA polymerase II-specific);GO:0003677(DNA binding);GO:0003700(DNA-binding transcription factor activity);GO:0005634(nucleus);GO:0005654(nucleoplasm);GO:0006355(regulation of DNA-templated transcription);GO:0006357(regulation of transcription by RNA pol…	NA	NA	NA	AP-2	transcription factor AP-2 alpha [Source:VGNC Symbol;Acc:VGNC:93908]	protein_coding	0	0.0584175	0.332109	0.0494577	0.0457088	0.111109	0.0287052	0.0802159	0.0603859	0.0303108	0.0288911	0.0390929	0	10	70	9	10	22	6	18	14	7	6	8
ENSSSCG00000001038	chr7	7462242	7473800	+	ENSSSCG00000001038		ENSSSCT00000097536;ENSSSCT00000077032	GO:0016020(membrane);GO:0016021(integral component of membrane);GO:0031966(mitochondrial membrane);GO:0070453(regulation of heme biosynthetic process);GO:0070453(regulation of heme biosynthetic process)	NA	NA	NA	NA		protein_coding	15.0387	17.8496	12.9532	16.8703	15.9428	14.3102	11.5673	13.5981	14.578	14.7841	17.5331	17.8568	3564	4031	3673	3806	4544	3842	3203	3993	4473	4115	4207	4393
ENSSSCG00000001040	chr7	7430542	7437789	-	C6orf52		ENSSSCT00000001134	NA	NA	NA	NA	NA	chromosome 7 C6orf52 homolog [Source:VGNC Symbol;Acc:VGNC:86073]	protein_coding	0	0	0	0	0	0	0	0	0	0	0	0.119132	0	0	0	0	0	0	0	0	0	0	0	5
ENSSSCG00000001041	chr7	7444789	7456716	+	PAK1IP1	100156606	ENSSSCT00000033062	GO:0005730(nucleolus);GO:0008283(cell population proliferation);GO:0042273(ribosomal large subunit biogenesis);GO:0060021(roof of mouth development);GO:1901796(regulation of signal transduction by p53 class mediator)	NA	NA	NA	NA	PAK1 interacting protein 1 [Source:VGNC Symbol;Acc:VGNC:91157]	protein_coding	8.98713	9.15777	8.45056	9.44113	8.51298	11.0825	12.4865	14.2016	12.8566	10.4613	9.88061	14.2401	679	659	763	679	773	948	1101	1328	1257	928	755	1116
ENSSSCG00000001042	chr7	7482097	7538282	-	MAK	100155401,57538	ENSSSCT00000061884	GO:0000166(nucleotide binding);GO:0001750(photoreceptor outer segment);GO:0001917(photoreceptor inner segment);GO:0003713(transcription coactivator activity);GO:0004672(protein kinase activity);GO:0004674(protein serine/threonine kinase activity);GO:0005524(ATP binding);GO:0005634(nucleus);GO:0005737(cytoplasm);GO:0005813(centrosome);GO:0005929(cilium);GO:0005930(axoneme);GO:0006468(protein phosp…	NA	K08829	EC:2.7.11.22	NA	male germ cell associated kinase [Source:VGNC Symbol;Acc:VGNC:89959]	protein_coding	0.390779	0.263434	0.363238	0.298318	0.204979	0.25951	0.320663	0.312422	0.221367	0.474716	0.117676	0.211953	68	44	75	49	43	51	65	67	50	97	21	38
ENSSSCG00000001045	chr7	7651601	7762633	-	ELOVL2	100153368	ENSSSCT00000056795;ENSSSCT00000001139;ENSSSCT00000057115	GO:0000038(very long-chain fatty acid metabolic process);GO:0005783(endoplasmic reticulum);GO:0005789(endoplasmic reticulum membrane);GO:0006629(lipid metabolic process);GO:0006631(fatty acid metabolic process);GO:0006633(fatty acid biosynthetic process);GO:0006636(unsaturated fatty acid biosynthetic process);GO:0008610(lipid biosynthetic process);GO:0009922(fatty acid elongase activity);GO:00160…	00062(Fatty acid elongation);01040(Biosynthesis of unsaturated fatty acids);01100(Metabolic pathways);01212(Fatty acid metabolism);01212(Fatty acid metabolism)	K10205	EC:2.3.1.199	NA	ELOVL fatty acid elongase 2 [Source:VGNC Symbol;Acc:VGNC:87658]	protein_coding	0.367982	0.40294	0.516444	1.52966	0.949173	0.363157	0.218122	0.269237	0.275014	0.496892	0.331424	0.315334	89	94	149	350	275	100	62	81	86	141	82	79
ENSSSCG00000001049	chr7	8515901	8661151	+	HIVEP1	100519608	ENSSSCT00000056911	GO:0000122(negative regulation of transcription by RNA polymerase II);GO:0000978(RNA polymerase II cis-regulatory region sequence-specific DNA binding);GO:0000981(DNA-binding transcription factor activity, RNA polymerase II-specific);GO:0001227(DNA-binding transcription repressor activity, RNA polymerase II-specific);GO:0005634(nucleus);GO:0005654(nucleoplasm);GO:0005739(mitochondrion);GO:0005829…	NA	NA	NA	zf-C2H2	HIVEP zinc finger 1 [Source:VGNC Symbol;Acc:VGNC:96585]	protein_coding	2.4976	2.86878	2.22812	3.18006	2.71471	2.54334	1.90424	1.67989	2.11329	2.0376	1.96799	2.95335	986	1079	1052	1195	1289	1137	878	822	1080	945	787	1210
ENSSSCG00000001052	chr7	9105874	9666881	+	PHACTR1	100153737	ENSSSCT00000051951;ENSSSCT00000037834;ENSSSCT00000063447;ENSSSCT00000055460	GO:0003779(actin binding);GO:0004864(protein phosphatase inhibitor activity);GO:0005634(nucleus);GO:0005737(cytoplasm);GO:0005829(cytosol);GO:0008157(protein phosphatase 1 binding);GO:0019888(protein phosphatase regulator activity);GO:0021987(cerebral cortex development);GO:0030054(cell junction);GO:0031032(actomyosin structure organization);GO:0031532(actin cytoskeleton reorganization);GO:004308…	NA	NA	NA	NA	phosphatase and actin regulator 1 [Source:VGNC Symbol;Acc:VGNC:91365]	protein_coding	2.36138	2.2443	1.34183	3.33166	3.55059	2.40691	1.9893	1.80212	1.31623	2.23272	1.43962	1.0048	638	579	434	857	1154	737	629	604	461	709	395	284
ENSSSCG00000001053	chr7	9685266	9707505	-	TBC1D7	100155821	ENSSSCT00000057128;ENSSSCT00000041329;ENSSSCT00000001147	GO:0005096(GTPase activator activity);GO:0031267(small GTPase binding);GO:0031398(positive regulation of protein ubiquitination);GO:0031410(cytoplasmic vesicle);GO:0032007(negative regulation of TOR signaling);GO:0033596(TSC1-TSC2 complex);GO:0036064(ciliary basal body);GO:0043547(positive regulation of GTPase activity);GO:0050790(regulation of catalytic activity);GO:0070848(response to growth fa…	04150(mTOR signaling pathway);04150(mTOR signaling pathway)	NA	NA	NA	TBC1 domain family member 7 [Source:VGNC Symbol;Acc:VGNC:93778]	protein_coding	5.57318	6.76602	6.54413	3.46675	4.85255	5.68868	8.01604	8.01685	6.50651	6.64535	7.25971	8.39709	617	713	865	366	645	713	1035	1098	931	863	812	964
ENSSSCG00000001056	chr7	9976096	10057669	-	RANBP9	100153339	ENSSSCT00000001150	GO:0000151(ubiquitin ligase complex);GO:0005634(nucleus);GO:0005654(nucleoplasm);GO:0005737(cytoplasm);GO:0005829(cytosol);GO:0007010(cytoskeleton organization);GO:0007166(cell surface receptor signaling pathway);GO:0016604(nuclear body);GO:0019899(enzyme binding);GO:0070373(negative regulation of ERK1 and ERK2 cascade)	NA	NA	NA	NA	RAN binding protein 9 [Source:VGNC Symbol;Acc:VGNC:92082]	protein_coding	13.6659	13.9735	17.3466	19.5403	17.6786	12.822	13.8851	11.896	12.5119	15.1698	11.7131	14.2986	1996	1945	3031	2717	3105	2122	2369	2153	2366	2603	1732	2168
ENSSSCG00000001057	chr7	10116201	10119393	+	ENSSSCG00000001057		ENSSSCT00000057971	NA	NA	NA	NA	NA	mitochondrial calcium uniporter regulator 1 [Source:VGNC Symbol;Acc:VGNC:90087]	lncRNA	5.49527	3.31167	5.0216	5.71103	5.20017	4.00845	4.791	4.87653	4.22208	3.53131	4.16951	3.43116	816	469	892	807	928	674	831	897	811	616	627	529
ENSSSCG00000001060	chr7	11239692	11240513	+	ENSSSCG00000001060		ENSSSCT00000001154	GO:0003824(catalytic activity);GO:0005634(nucleus);GO:0005737(cytoplasm);GO:0009154(purine ribonucleotide catabolic process);GO:0016787(hydrolase activity)	NA	NA	NA	NA		protein_coding	0	0.043075	0	0.211632	0.221307	0	0	0	0.15084	0	0.26292	0.369047	0	1	0	3	3	0	0	0	3	0	3	5
ENSSSCG00000001061	chr7	11359230	11601401	+	JARID2	100524569	ENSSSCT00000063145	GO:0000122(negative regulation of transcription by RNA polymerase II);GO:0001889(liver development);GO:0003677(DNA binding);GO:0003682(chromatin binding);GO:0005634(nucleus);GO:0005654(nucleoplasm);GO:0005739(mitochondrion);GO:0008283(cell population proliferation);GO:0009048(dosage compensation by inactivation of X chromosome);GO:0031061(negative regulation of histone methylation);GO:0035097(his…	04550(Signaling pathways regulating pluripotency of stem cells)	NA	NA	ARID	jumonji and AT-rich interaction domain containing 2 [Source:VGNC Symbol;Acc:VGNC:89279]	protein_coding	5.58649	6.66284	4.41179	5.99747	5.73165	4.31588	4.18558	5.02032	5.09653	4.89239	5.75226	6.3919	1358	1543	1283	1388	1676	1189	1189	1512	1604	1397	1416	1613
ENSSSCG00000001062	chr7	11602394	11720318	-	DTNBP1	100049697	ENSSSCT00000089435;ENSSSCT00000070912;ENSSSCT00000087294;ENSSSCT00000001157;ENSSSCT00000066484	GO:0001956(positive regulation of neurotransmitter secretion);GO:0005634(nucleus);GO:0005737(cytoplasm);GO:0005789(endoplasmic reticulum membrane);GO:0005886(plasma membrane);GO:0006996(organelle organization);GO:0007596(blood coagulation);GO:0008089(anterograde axonal transport);GO:0010628(positive regulation of gene expression);GO:0014059(regulation of dopamine secretion);GO:0014069(postsynapti…	NA	NA	NA	NA	dystrobrevin binding protein 1 [Source:VGNC Symbol;Acc:VGNC:87463]	protein_coding	10.4779	12.5378	12.7562	17.7931	18.329	9.5192	8.88144	9.12989	10.7253	13.0549	8.77319	11.3638	960	1094	1398	1552	2018	987	950	1036	1271	1405	814	1081
ENSSSCG00000001063	chr7	12117240	12137925	+	MYLIP	100155795	ENSSSCT00000001158	GO:0004842(ubiquitin-protein transferase activity);GO:0005856(cytoskeleton);GO:0006511(ubiquitin-dependent protein catabolic process);GO:0007399(nervous system development);GO:0008092(cytoskeletal protein binding);GO:0010977(negative regulation of neuron projection development);GO:0010989(negative regulation of low-density lipoprotein particle clearance);GO:0016567(protein ubiquitination);GO:0031…	04979(Cholesterol metabolism)	K10637	EC:2.3.2.27	NA	myosin regulatory light chain interacting protein [Source:VGNC Symbol;Acc:VGNC:103999]	protein_coding	14.5884	13.6063	10.439	19.4676	18.7823	13.1987	10.9636	8.56222	7.60928	11.5085	7.68898	11.5796	2125	1889	1819	2700	3291	2178	1866	1546	1435	1969	1134	1751
ENSSSCG00000001064	chr7	12254388	12299531	+	GMPR	100154573	ENSSSCT00000067986;ENSSSCT00000096783;ENSSSCT00000075711;ENSSSCT00000001159	GO:0003824(catalytic activity);GO:0003920(GMP reductase activity);GO:0006144(purine nucleobase metabolic process);GO:0006163(purine nucleotide metabolic process);GO:0009117(nucleotide metabolic process);GO:0016020(membrane);GO:0016021(integral component of membrane);GO:0016491(oxidoreductase activity);GO:0046872(metal ion binding);GO:1902560(GMP reductase complex);GO:1902560(GMP reductase complex)	00230(Purine metabolism);01100(Metabolic pathways);01100(Metabolic pathways)	K00364	EC:1.7.1.7	NA	guanosine monophosphate reductase [Source:VGNC Symbol;Acc:VGNC:88514]	protein_coding	2.04574	1.99826	2.03015	2.83592	2.51048	1.76612	2.17687	2.11969	2.47639	2.07031	2.30721	2.13041	682	634	809	900	1007	667	847	875	1068	810	779	737
ENSSSCG00000001065	chr7	12301013	12457450	-	ATXN1	100623695	ENSSSCT00000051224	GO:0000122(negative regulation of transcription by RNA polymerase II);GO:0003677(DNA binding);GO:0003723(RNA binding);GO:0005634(nucleus);GO:0005654(nucleoplasm);GO:0005730(nucleolus);GO:0005737(cytoplasm);GO:0005829(cytosol);GO:0006355(regulation of DNA-templated transcription);GO:0007399(nervous system development);GO:0008022(protein C-terminus binding);GO:0008266(poly(U) RNA binding);GO:001636…	04330(Notch signaling pathway);05017(Spinocerebellar ataxia);05022(Pathways of neurodegeneration - multiple diseases)	NA	NA	NA	ataxin 1 [Source:VGNC Symbol;Acc:VGNC:85687]	protein_coding	1.86836	1.64234	1.73594	2.02118	1.58598	1.29917	1.92926	1.96425	1.49036	1.91911	1.98504	1.02397	573	480	637	591	585	452	692	747	592	692	617	326
ENSSSCG00000001068	chr7	13211574	13350961	+	CAP2	100523257,5271,56649	ENSSSCT00000001163	GO:0000902(cell morphogenesis);GO:0003779(actin binding);GO:0005737(cytoplasm);GO:0005886(plasma membrane);GO:0007010(cytoskeleton organization);GO:0008179(adenylate cyclase binding);GO:0014069(postsynaptic density);GO:0019933(cAMP-mediated signaling);GO:0042802(identical protein binding);GO:0045761(regulation of adenylate cyclase activity)	NA	NA	NA	NA	cyclase associated actin cytoskeleton regulatory protein 2 [Source:VGNC Symbol;Acc:VGNC:86168]	protein_coding	6.15105	2.36806	0.713326	1.44773	1.618	1.80547	3.00628	3.66391	2.468	1.74279	2.85066	1.54041	880	323	123	198	279	293	503	650	457	293	413	229
ENSSSCG00000001070	chr7	13378139	13390889	+	FAM8A1	100154793	ENSSSCT00000086870	GO:0000836(Hrd1p ubiquitin ligase complex);GO:0016020(membrane);GO:0016021(integral component of membrane)	NA	NA	NA	NA	family with sequence similarity 8 member A1 [Source:VGNC Symbol;Acc:VGNC:87996]	protein_coding	12.627	15.2807	13.6815	15.5816	15.128	12.9041	10.2068	10.7862	10.3633	13.3989	14.1585	14.9646	2579	2974	3343	3030	3716	2986	2436	2729	2740	3214	2927	3173
ENSSSCG00000001072	chr7	13816246	13817644	-	NHLRC1	100152396	ENSSSCT00000001167	NA	04120(Ubiquitin mediated proteolysis)	K10602	EC:2.3.2.27	NA	NHL repeat containing E3 ubiquitin protein ligase 1 [Source:NCBI gene (formerly Entrezgene);Acc:100152396]	pseudogene	0.898654	0.582649	0.388258	0.183923	0.598081	0.339488	0.957285	0.720128	0.844196	0.819086	0.384827	0.732396	60	38	31	12	48	26	75	60	73	65	26	51
ENSSSCG00000001073	chr7	13820866	13846012	-	TPMT	100157630	ENSSSCT00000001168	GO:0005737(cytoplasm);GO:0006805(xenobiotic metabolic process);GO:0008119(thiopurine S-methyltransferase activity);GO:0008168(methyltransferase activity);GO:0008757(S-adenosylmethionine-dependent methyltransferase activity);GO:0016740(transferase activity);GO:0032259(methylation);GO:1904047(S-adenosyl-L-methionine binding)	00983(Drug metabolism - other enzymes)	K00569	EC:2.1.1.67	NA	thiopurine S-methyltransferase [Source:VGNC Symbol;Acc:VGNC:94340]	protein_coding	1.37707	1.13428	2.207	1.98855	1.14868	1.51364	1.79331	2.72941	1.85391	0.984975	2.87577	2.08625	108	85	207	149	109	135	164	265	188	91	228	170
ENSSSCG00000001074	chr7	13845942	13901255	+	KDM1B	100158047	ENSSSCT00000001169	GO:0000122(negative regulation of transcription by RNA polymerase II);GO:0000786(nucleosome);GO:0003682(chromatin binding);GO:0005634(nucleus);GO:0005654(nucleoplasm);GO:0006349(regulation of gene expression by genomic imprinting);GO:0008270(zinc ion binding);GO:0016491(oxidoreductase activity);GO:0032453(histone H3-methyl-lysine-4 demethylase activity);GO:0034720(histone H3-K4 demethylation);GO:…	NA	NA	NA	NA	lysine demethylase 1B [Source:VGNC Symbol;Acc:VGNC:89409]	protein_coding	2.66514	3.06167	2.65429	2.55558	2.19161	3.35868	2.56883	2.79241	2.65028	2.66908	2.29437	2.32062	621	680	740	567	614	886	699	806	799	730	541	561
ENSSSCG00000001075	chr7	13901569	13935482	-	ENSSSCG00000001075		ENSSSCT00000001170;ENSSSCT00000072363;ENSSSCT00000098499	GO:0003677(DNA binding);GO:0005634(nucleus);GO:0006325(chromatin organization);GO:0042393(histone binding);GO:2000779(regulation of double-strand break repair);GO:2000779(regulation of double-strand break repair)	NA	NA	NA	NA	DEK proto-onco [Source:VGNC Symbol;Acc:VGNC:103934]	protein_coding	32.4764	31.871	33.1822	40.9078	38.0259	24.7961	25.3767	25.9907	25.3278	27.7087	21.0738	28.6537	5732	5361	7006	6875	8072	4959	5233	5684	5788	5745	3766	5250
ENSSSCG00000001076	chr7	13946658	14119091	+	RNF144B	100155665	ENSSSCT00000052830	GO:0004842(ubiquitin-protein transferase activity);GO:0005737(cytoplasm);GO:0006511(ubiquitin-dependent protein catabolic process);GO:0016020(membrane);GO:0016021(integral component of membrane);GO:0016567(protein ubiquitination);GO:0016740(transferase activity);GO:0031966(mitochondrial membrane);GO:0043066(negative regulation of apoptotic process);GO:0046872(metal ion binding)	NA	K11975	EC:2.3.2.31	NA	ring finger protein 144B [Source:VGNC Symbol;Acc:VGNC:92359]	protein_coding	1.40064	1.65411	1.34139	1.44114	1.33208	0.611515	0.69676	1.19036	0.78576	2.77943	0.841566	1.8233	425	478	487	416	486	210	247	447	309	989	259	574
ENSSSCG00000001078	chr7	15532015	15643692	-	MBOAT1	100152017	ENSSSCT00000069759;ENSSSCT00000001173	GO:0016020(membrane);GO:0016021(integral component of membrane);GO:0016740(transferase activity);GO:0016746(acyltransferase activity);GO:0030258(lipid modification);GO:0036150(phosphatidylserine acyl-chain remodeling);GO:0106263(1-acylglycerophosphoserine O-acyltransferase activity);GO:0106263(1-acylglycerophosphoserine O-acyltransferase activity)	00561(Glycerolipid metabolism);00564(Glycerophospholipid metabolism);01100(Metabolic pathways);01100(Metabolic pathways)	K13517	EC:2.3.1.51	NA	membrane bound O-acyltransferase domain containing 1 [Source:VGNC Symbol;Acc:VGNC:90057]	protein_coding	2.63542	2.1334	2.89843	2.66087	2.5303	2.58887	2.19211	2.32375	2.84269	1.94555	1.60566	2.19136	564	436	742	542	651	627	549	616	788	490	348	487
ENSSSCG00000001080	chr7	15910666	16626276	+	CDKAL1	100512355	ENSSSCT00000066464;ENSSSCT00000063418;ENSSSCT00000042404;ENSSSCT00000001175;ENSSSCT00000040980	GO:0003824(catalytic activity);GO:0005783(endoplasmic reticulum);GO:0005789(endoplasmic reticulum membrane);GO:0005791(rough endoplasmic reticulum);GO:0006400(tRNA modification);GO:0008033(tRNA processing);GO:0016020(membrane);GO:0016021(integral component of membrane);GO:0016740(transferase activity);GO:0035596(methylthiotransferase activity);GO:0035598(N6-threonylcarbomyladenosine methylthiotra…	NA	K15865	EC:2.8.4.5	NA	CDK5 regulatory subunit associated protein 1 like 1 [Source:VGNC Symbol;Acc:VGNC:86509]	protein_coding	2.00555	2.85541	3.08582	3.32969	3.28737	3.09131	3.23651	2.94897	2.44329	2.23631	4.04255	2.45948	415	561	761	653	814	722	779	753	653	541	843	528
ENSSSCG00000001083	chr7	17695258	17696497	+	ENSSSCG00000001083		ENSSSCT00000001178	GO:0003690(double-stranded DNA binding);GO:0003712(transcription coregulator activity);GO:0005634(nucleus);GO:0006357(regulation of transcription by RNA polymerase II)	NA	NA	NA	NA	HDGF like 1 [Source:VGNC Symbol;Acc:VGNC:88820]	protein_coding	0	0	0	0.105947	0	0	0	0.131852	0	0	0	0	0	0	0	4	0	0	0	5	0	0	0	0
ENSSSCG00000001085	chr7	19048088	19219075	-	DCDC2	100153025	ENSSSCT00000087196	GO:0001764(neuron migration);GO:0005737(cytoplasm);GO:0005815(microtubule organizing center);GO:0005829(cytosol);GO:0005874(microtubule);GO:0005929(cilium);GO:0005930(axoneme);GO:0007605(sensory perception of sound);GO:0015630(microtubule cytoskeleton);GO:0030111(regulation of Wnt signaling pathway);GO:0034451(centriolar satellite);GO:0035556(intracellular signal transduction);GO:0045880(positive…	NA	NA	NA	NA	doublecortin domain containing 2 [Source:VGNC Symbol;Acc:VGNC:87181]	protein_coding	0.110178	0.404124	0.0150039	0.624231	0.383871	0.096964	0.0797555	0.065033	0.0683389	0.141195	0.0672173	0.081847	19	65	4	100	78	19	16	14	15	28	12	15
ENSSSCG00000001087	chr7	19244661	19291531	+	MRS2	100151824	ENSSSCT00000048351	GO:0005739(mitochondrion);GO:0005743(mitochondrial inner membrane);GO:0006811(ion transport);GO:0015095(magnesium ion transmembrane transporter activity);GO:0016020(membrane);GO:0016021(integral component of membrane);GO:0045016(mitochondrial magnesium ion transmembrane transport)	NA	NA	NA	NA	magnesium transporter MRS2 [Source:VGNC Symbol;Acc:VGNC:90403]	protein_coding	11.0592	12.3206	7.069	8.11139	8.5199	12.1757	9.39091	9.80644	10.8992	9.15525	13.0231	9.69341	1834	1947	1403	1281	1699	2288	1820	2015	2340	1784	2186	1669
ENSSSCG00000001088	chr7	19272032	19272388	-	ENSSSCG00000001088		ENSSSCT00000001184	NA	NA	NA	NA	NA		processed_pseudogene	1.37193	0.32578	0.097635	0.245356	0.586596	1.10365	0.693118	0.151851	2.45115	0.428443	0.394906	1.30796	24	6	2	4	12	22	14	4	54	9	7	24
ENSSSCG00000001089	chr7	19291174	19346619	-	GPLD1	100157497	ENSSSCT00000001185;ENSSSCT00000053373	GO:0002042(cell migration involved in sprouting angiogenesis);GO:0002430(complement receptor mediated signaling pathway);GO:0004621(glycosylphosphatidylinositol phospholipase D activity);GO:0004630(phospholipase D activity);GO:0005576(extracellular region);GO:0005615(extracellular space);GO:0005737(cytoplasm);GO:0006507(GPI anchor release);GO:0008285(negative regulation of cell population prolife…	00563(Glycosylphosphatidylinositol (GPI)-anchor biosynthesis);01100(Metabolic pathways);01100(Metabolic pathways)	K01127	EC:3.1.4.50	NA	glycosylphosphatidylinositol specific phospholipase D1 [Source:VGNC Symbol;Acc:VGNC:88590]	protein_coding	0.276916	0.581983	0.400034	0.109225	0.279389	0.232947	0.170511	0.358994	0.325961	0.205169	0.419622	0.388866	73	146	125	28	88	69	52	116	110	64	111	106
ENSSSCG00000001090	chr7	19351361	19379098	+	ALDH5A1	100157072	ENSSSCT00000001186;ENSSSCT00000042690;ENSSSCT00000088065	GO:0004777(succinate-semialdehyde dehydrogenase (NAD+) activity);GO:0005739(mitochondrion);GO:0006105(succinate metabolic process);GO:0006536(glutamate metabolic process);GO:0007417(central nervous system development);GO:0009013(succinate-semialdehyde dehydrogenase [NAD(P)+] activity);GO:0009448(gamma-aminobutyric acid metabolic process);GO:0009450(gamma-aminobutyric acid catabolic process);GO:00…	00250(Alanine, aspartate and glutamate metabolism);00650(Butanoate metabolism);01100(Metabolic pathways);01100(Metabolic pathways)	K00139	EC:1.2.1.24	NA	aldehyde dehydrogenase 5 family member A1 [Source:VGNC Symbol;Acc:VGNC:85241]	protein_coding	7.7538	8.1293	2.88505	7.80274	8.23854	8.34618	6.84398	5.73561	7.78617	3.57378	8.83917	4.75231	2040	2039	909	1954	2607	2487	2104	1870	2652	1105	2355	1298
ENSSSCG00000001091	chr7	19383196	19486265	-	KIAA0319	100738226	ENSSSCT00000087274	GO:0001764(neuron migration);GO:0005769(early endosome);GO:0005886(plasma membrane);GO:0010996(response to auditory stimulus);GO:0016020(membrane);GO:0016021(integral component of membrane);GO:0030517(negative regulation of axon extension);GO:0031410(cytoplasmic vesicle);GO:0033555(multicellular organismal response to stress);GO:0043231(intracellular membrane-bounded organelle);GO:0048692(negativ…	NA	NA	NA	NA	KIAA0319 [Source:VGNC Symbol;Acc:VGNC:89429]	protein_coding	0.0640277	0.0375648	0.0204162	0.0251408	0	0.0290962	0	0.135777	0.0482587	0	0.0621051	0.0381057	20	11	8	8	0	10	0	51	19	0	19	12
ENSSSCG00000001092	chr7	19489384	19502520	-	TDP2	100157860	ENSSSCT00000069302;ENSSSCT00000001188	GO:0000287(magnesium ion binding);GO:0003697(single-stranded DNA binding);GO:0003824(catalytic activity);GO:0005634(nucleus);GO:0005654(nucleoplasm);GO:0005737(cytoplasm);GO:0006302(double-strand break repair);GO:0016235(aggresome);GO:0016604(nuclear body);GO:0016605(PML body);GO:0030145(manganese ion binding);GO:0036317(tyrosyl-RNA phosphodiesterase activity);GO:0048666(neuron development);GO:00…	NA	NA	NA	NA	tyrosyl-DNA phosphodiesterase 2 [Source:VGNC Symbol;Acc:VGNC:93845]	protein_coding	9.37258	10.3377	10.5705	9.77097	10.6448	9.54216	9.55604	8.83881	8.47766	9.17056	11.6721	8.47879	1046	1099	1411	1038	1429	1206	1246	1222	1225	1202	1319	982
ENSSSCG00000001095	chr7	19586002	19595344	+	GMNN	100515035	ENSSSCT00000052615	GO:0003682(chromatin binding);GO:0003714(transcription corepressor activity);GO:0005634(nucleus);GO:0005654(nucleoplasm);GO:0005737(cytoplasm);GO:0005829(cytosol);GO:0006275(regulation of DNA replication);GO:0007346(regulation of mitotic cell cycle);GO:0008156(negative regulation of DNA replication);GO:0009887(animal organ morphogenesis);GO:0017053(transcription repressor complex);GO:0030174(regu…	NA	NA	NA	NA	geminin DNA replication inhibitor [Source:VGNC Symbol;Acc:VGNC:88513]	protein_coding	11.361	12.1278	7.79834	10.555	12.2958	7.81159	7.75847	11.7321	9.7807	9.09037	8.96191	10.4416	802	816	659	710	1044	625	640	1026	894	754	641	765
ENSSSCG00000001096	chr7	19598807	19602084	-	ARMH2	100516325	ENSSSCT00000001192	NA	NA	NA	NA	NA	armadillo like helical domain containing 2 [Source:VGNC Symbol;Acc:VGNC:85533]	protein_coding	0	0	0.058878	0	0	0	0	0	0	0	0	0	0	0	4	0	0	0	0	0	0	0	0	0
ENSSSCG00000001097	chr7	19609358	19838093	-	RIPOR2	100154661	ENSSSCT00000054242;ENSSSCT00000044070;ENSSSCT00000057946;ENSSSCT00000001193;ENSSSCT00000047462;ENSSSCT00000037491	GO:0005737(cytoplasm);GO:0005856(cytoskeleton);GO:0005886(plasma membrane);GO:0006935(chemotaxis);GO:0007155(cell adhesion);GO:0007162(negative regulation of cell adhesion);GO:0007517(muscle organ development);GO:0007605(sensory perception of sound);GO:0009968(negative regulation of signal transduction);GO:0016020(membrane);GO:0016324(apical plasma membrane);GO:0030154(cell differentiation);GO:00…	NA	NA	NA	NA	RHO family interacting cell polarization regulator 2 [Source:VGNC Symbol;Acc:VGNC:92322]	protein_coding	1.66836	1.26514	0.779861	1.32707	1.05254	0.628549	0.756661	0.809042	0.942929	0.807235	0.866873	0.669927	557	404	312	424	425	239	296	336	409	318	295	233
ENSSSCG00000001098	chr7	19631180	19632596	-	ENSSSCG00000001098		ENSSSCT00000001194	NA	NA	NA	NA	NA		protein_coding	0.031543	0	0	0	0	0	0	0	0	0	0	0	2	0	0	0	0	0	0	0	0	0	0	0
ENSSSCG00000001099	chr7	19870966	19955759	-	CMAH	396918,8418	ENSSSCT00000075719;ENSSSCT00000001195	GO:0005737(cytoplasm);GO:0006054(N-acetylneuraminate metabolic process);GO:0030338(CMP-N-acetylneuraminate monooxygenase activity);GO:0046381(CMP-N-acetylneuraminate metabolic process);GO:0046872(metal ion binding);GO:0051536(iron-sulfur cluster binding);GO:0051537(2 iron, 2 sulfur cluster binding);GO:0051537(2 iron, 2 sulfur cluster binding)	00520(Amino sugar and nucleotide sugar metabolism);00520(Amino sugar and nucleotide sugar metabolism)	K08080	EC:1.14.18.2	NA	cytidine monophosphate-N-acetylneuraminic acid hydroxylase [Source:NCBI gene (formerly Entrezgene);Acc:396918]	protein_coding	0.844129	1.00498	0.888525	1.64297	1.49258	0.509544	0.545072	0.506245	0.477598	0.894824	0.66515	0.72471	240	272	302	445	510	165	181	179	177	299	192	215
ENSSSCG00000001100	chr7	20036944	20353420	+	CARMIL1	100157771	ENSSSCT00000001196	GO:0005654(nucleoplasm);GO:0005737(cytoplasm);GO:0005829(cytosol);GO:0005886(plasma membrane);GO:0016477(cell migration);GO:0016607(nuclear speck);GO:0030027(lamellipodium);GO:0030032(lamellipodium assembly);GO:0030335(positive regulation of cell migration);GO:0030838(positive regulation of actin filament polymerization);GO:0031252(cell leading edge);GO:0031529(ruffle organization);GO:0031941(fil…	NA	NA	NA	NA	capping protein regulator and myosin 1 linker 1 [Source:VGNC Symbol;Acc:VGNC:86192]	protein_coding	6.60176	5.05448	6.74965	4.24012	4.14502	3.81164	4.62414	3.87336	3.67373	4.33065	2.66307	3.3112	1614	1178	1974	987	1219	1056	1321	1173	1163	1244	659	841
ENSSSCG00000001107	chr7	20524626	20574460	-	SLC17A1	397621	ENSSSCT00000001203	GO:0005764(lysosome);GO:0005887(integral component of plasma membrane);GO:0006820(anion transport);GO:0015136(sialic acid transmembrane transporter activity);GO:0015739(sialic acid transport);GO:0015747(urate transport);GO:0016020(membrane);GO:0016021(integral component of membrane);GO:0016324(apical plasma membrane);GO:0022857(transmembrane transporter activity);GO:0046415(urate metabolic proces…	NA	NA	NA	NA	solute carrier family 17 member 1 [Source:VGNC Symbol;Acc:VGNC:92950]	protein_coding	0.00750256	0.00719614	0.00850865	0.021136	0.0245664	0.00526828	0.00244632	0	0.011038	0	0	0	3	2	3	6	9	2	1	0	4	0	0	0
ENSSSCG00000001131	chr7	20954224	20965132	+	ENSSSCG00000001131		ENSSSCT00000068859	GO:0016020(membrane);GO:0016021(integral component of membrane)	NA	NA	NA	NA		protein_coding	0.614982	1.33267	0.8309	0.641494	0.486592	1.43835	0.771662	0.541562	0.312165	0.47827	0.241067	0.414525	52	106	83	51	49	136	75	56	34	47	21	36
ENSSSCG00000001132	chr7	20977442	20985070	+	BTN1A1	100626139	ENSSSCT00000033676	GO:0001817(regulation of cytokine production);GO:0005102(signaling receptor binding);GO:0009897(external side of plasma membrane);GO:0016020(membrane);GO:0016021(integral component of membrane);GO:0050852(T cell receptor signaling pathway)	NA	NA	NA	NA	butyrophilin subfamily 1 member A1 [Source:VGNC Symbol;Acc:VGNC:85915]	protein_coding	0	0	0	0.057642	0	0	0	0	0	0	0	0	0	0	0	8	0	0	0	0	0	0	0	0
ENSSSCG00000001137	chr7	20862952	20882307	-	H1-3		ENSSSCT00000066932	GO:0000785(chromatin);GO:0000786(nucleosome);GO:0000791(euchromatin);GO:0003677(DNA binding);GO:0005634(nucleus);GO:0005694(chromosome);GO:0006334(nucleosome assembly);GO:0030527(structural constituent of chromatin);GO:0031490(chromatin DNA binding);GO:0046982(protein heterodimerization activity)	NA	NA	NA	NA	H1.3 linker histone, cluster member [Source:HGNC Symbol;Acc:HGNC:4717]	protein_coding	21.2253	15.2367	27.5601	9.85224	11.4242	24.5622	22.5843	23.5766	24.6715	14.7455	46.2464	27.821	980	671	1523	434	635	1285	1219	1349	1475	800	2162	1334
ENSSSCG00000001156	chr7	21127869	21143387	-	ZNF322	100154074,387328	ENSSSCT00000039473;ENSSSCT00000001254	GO:0000978(RNA polymerase II cis-regulatory region sequence-specific DNA binding);GO:0000981(DNA-binding transcription factor activity, RNA polymerase II-specific);GO:0005654(nucleoplasm);GO:0005813(centrosome);GO:0005829(cytosol);GO:0006357(regulation of transcription by RNA polymerase II);GO:0006357(regulation of transcription by RNA polymerase II)	NA	NA	NA	zf-C2H2	zinc finger protein 322 [Source:VGNC Symbol;Acc:VGNC:95224]	protein_coding	6.14262	7.0976	6.32173	6.39559	5.82637	6.20257	6.32823	7.55476	6.83338	6.58677	5.92176	7.41892	1444	1590	1778	1431	1647	1651	1737	2199	2078	1818	1409	1809
ENSSSCG00000001164	chr7	21413350	21435221	-	ZNF184	100620153	ENSSSCT00000055328	GO:0000978(RNA polymerase II cis-regulatory region sequence-specific DNA binding);GO:0000981(DNA-binding transcription factor activity, RNA polymerase II-specific);GO:0005634(nucleus);GO:0006355(regulation of DNA-templated transcription);GO:0006357(regulation of transcription by RNA polymerase II);GO:0046872(metal ion binding)	05168(Herpes simplex virus 1 infection)	NA	NA	zf-C2H2	zinc finger protein 184 [Source:VGNC Symbol;Acc:VGNC:95200]	protein_coding	3.80301	4.39177	3.34924	6.30537	5.17294	4.08762	3.90121	3.66505	4.12998	3.98111	3.4763	5.15005	557	613	587	879	911	679	668	665	783	685	516	783
ENSSSCG00000001201	chr7	21981150	22000819	+	ZKSCAN8		ENSSSCT00000037299	GO:0000978(RNA polymerase II cis-regulatory region sequence-specific DNA binding);GO:0000981(DNA-binding transcription factor activity, RNA polymerase II-specific);GO:0003677(DNA binding);GO:0005634(nucleus);GO:0006355(regulation of DNA-templated transcription);GO:0006357(regulation of transcription by RNA polymerase II);GO:0046872(metal ion binding)	NA	NA	NA	zf-C2H2	zinc finger with KRAB and SCAN domains 8 [Source:HGNC Symbol;Acc:HGNC:12983]	protein_coding	4.02407	4.82617	2.62902	4.1321	3.61494	3.07457	2.93487	2.70787	2.8809	3.33773	3.0829	4.00994	1384	1582	1082	1353	1495	1198	1179	1154	1283	1348	1074	1432
ENSSSCG00000001202	chr7	22007384	22011972	+	ZNF389	100270748,651302	ENSSSCT00000001300	GO:0000978(RNA polymerase II cis-regulatory region sequence-specific DNA binding);GO:0000981(DNA-binding transcription factor activity, RNA polymerase II-specific);GO:0006357(regulation of transcription by RNA polymerase II)	NA	NA	NA	zf-C2H2	zinc finger protein 389 [Source:NCBI gene (formerly Entrezgene);Acc:100270748]	protein_coding	1.67845	1.83364	1.01134	2.01981	1.45141	1.34945	1.91194	1.52222	1.62689	1.01129	1.33352	2.08152	115	119	83	131	119	104	152	129	144	81	92	147
ENSSSCG00000001203	chr7	22082171	22089673	+	ZSCAN9	100154531	ENSSSCT00000001301	GO:0000978(RNA polymerase II cis-regulatory region sequence-specific DNA binding);GO:0000981(DNA-binding transcription factor activity, RNA polymerase II-specific);GO:0005634(nucleus);GO:0006357(regulation of transcription by RNA polymerase II);GO:1990837(sequence-specific double-stranded DNA binding)	NA	NA	NA	zf-C2H2	zinc finger and SCAN domain containing 9 [Source:VGNC Symbol;Acc:VGNC:95332]	protein_coding	0.136285	0.252316	0.024802	0.24276	0.134941	0	0.238345	0.229574	0.283802	0.218638	0.105499	0.384699	28	49	6	47	33	0	56	58	74	52	22	81
ENSSSCG00000001204	chr7	22093059	22101839	+	ZKSCAN4	100156123	ENSSSCT00000001302	GO:0000978(RNA polymerase II cis-regulatory region sequence-specific DNA binding);GO:0000981(DNA-binding transcription factor activity, RNA polymerase II-specific);GO:0003677(DNA binding);GO:0005634(nucleus);GO:0005654(nucleoplasm);GO:0006355(regulation of DNA-templated transcription);GO:0006357(regulation of transcription by RNA polymerase II);GO:0042802(identical protein binding);GO:0046872(met…	NA	NA	NA	zf-C2H2	zinc finger with KRAB and SCAN domains 4 [Source:VGNC Symbol;Acc:VGNC:95173]	protein_coding	0.84066	0.270637	0.85046	1.5038	0.945924	0.985438	1.1871	1.36376	0.710418	0.71976	0.525225	0.931666	97	30	118	166	132	129	160	195	107	98	62	112
ENSSSCG00000001205	chr7	22108647	22110123	+	NKAPL	100154907	ENSSSCT00000001303	GO:0003682(chromatin binding);GO:0005634(nucleus);GO:0010468(regulation of gene expression)	NA	NA	NA	NA	NFKB activating protein like [Source:VGNC Symbol;Acc:VGNC:90758]	protein_coding	0.282337	0.498109	0.353825	0.664286	0.364542	0.729864	0.048329	0.06836	0.310573	0.644572	0.25697	0.167927	20	34	30	45	31	59	4	6	29	54	19	13
ENSSSCG00000001206	chr7	22114868	22132502	+	ZSCAN26	110255333	ENSSSCT00000001304	GO:0005634(nucleus);GO:0005654(nucleoplasm);GO:0005829(cytosol)	NA	NA	NA	zf-C2H2	zinc finger and SCAN domain containing 26 [Source:VGNC Symbol;Acc:VGNC:95330]	protein_coding	1.97472	1.19099	1.96523	2.18589	3.47064	1.47295	2.91496	2.43924	1.89228	2.7208	1.86292	2.66729	162	94	193	171	343	137	280	248	201	263	155	228
ENSSSCG00000001207	chr7	22137966	22156952	+	PGBD1	100739221	ENSSSCT00000001305	GO:0000978(RNA polymerase II cis-regulatory region sequence-specific DNA binding);GO:0000981(DNA-binding transcription factor activity, RNA polymerase II-specific);GO:0005634(nucleus);GO:0006357(regulation of transcription by RNA polymerase II);GO:0042802(identical protein binding)	NA	NA	NA	NA	piggyBac transposable element derived 1 [Source:VGNC Symbol;Acc:VGNC:91345]	protein_coding	1.52884	1.94871	2.07891	2.28857	1.96124	1.62743	1.71661	1.39331	1.60204	1.18681	0.994462	1.287	299	363	486	426	461	360	392	337	405	272	197	261
ENSSSCG00000001209	chr7	22186048	22210072	-	ZSCAN12	100152126	ENSSSCT00000080442;ENSSSCT00000001307	GO:0000978(RNA polymerase II cis-regulatory region sequence-specific DNA binding);GO:0000981(DNA-binding transcription factor activity, RNA polymerase II-specific);GO:0005634(nucleus);GO:0006357(regulation of transcription by RNA polymerase II);GO:0006357(regulation of transcription by RNA polymerase II)	NA	NA	NA	zf-C2H2	zinc finger and SCAN domain containing 12 [Source:VGNC Symbol;Acc:VGNC:95325]	protein_coding	1.2021	1.05184	0.963921	0.844669	1.18868	0.850028	1.19387	1.15988	0.857267	1.05279	0.958496	1.29047	378	316	363	253	449	303	439	451	349	389	305	422
ENSSSCG00000001216	chr7	22312590	22332370	-	ZBED9	100524503	ENSSSCT00000001314	GO:0003676(nucleic acid binding);GO:0005634(nucleus);GO:0005737(cytoplasm);GO:0015074(DNA integration);GO:0045787(positive regulation of cell cycle);GO:0050679(positive regulation of epithelial cell proliferation)	NA	NA	NA	NA	zinc finger BED-type containing 9 [Source:HGNC Symbol;Acc:HGNC:13851]	protein_coding	0.253125	0.380107	0.338165	0.387181	0.262372	0.192205	0.127051	0.280694	0.110547	0.262149	0.301955	0.189398	49	69	78	71	61	42	29	67	28	59	59	38
ENSSSCG00000001229	chr7	22938248	22941034	+	ENSSSCG00000001229		ENSSSCT00000102827;ENSSSCT00000035823;ENSSSCT00000001329	GO:0006955(immune response);GO:0016020(membrane);GO:0016021(integral component of membrane);GO:0019882(antigen processing and presentation);GO:0030670(phagocytic vesicle membrane);GO:0071556(integral component of lumenal side of endoplasmic reticulum membrane);GO:0071556(integral component of lumenal side of endoplasmic reticulum membrane)	04144(Endocytosis);04145(Phagosome);04218(Cellular senescence);04514(Cell adhesion molecules);04612(Antigen processing and presentation);04940(Type I diabetes mellitus);05163(Human cytomegalovirus infection);05165(Human papillomavirus infection);05166(Human T-cell leukemia virus 1 infection);05167(Kaposi sarcoma-associated herpesvirus infection);05168(Herpes simplex virus 1 infection);05169(Epste…	NA	NA	NA	MHC class I antigen 3 [Source:NCBI gene (formerly Entrezgene);Acc:100037288]	protein_coding	196.183	231.353	89.4238	218.512	183.604	98.9914	64.065	118.178	88.9537	92.9244	55.0207	64.4142	27190	30555	14828	28835	30607	15544	10375	20294	15962	15130	7722	9269
ENSSSCG00000001232	chr7	22780491	22805638	+	ENSSSCG00000001232		ENSSSCT00000001339	GO:0005737(cytoplasm);GO:0008270(zinc ion binding);GO:0010468(regulation of gene expression);GO:0016567(protein ubiquitination);GO:0045087(innate immune response);GO:0046872(metal ion binding);GO:0051091(positive regulation of DNA-binding transcription factor activity);GO:0061630(ubiquitin protein ligase activity)	NA	NA	NA	NA		protein_coding	0.102097	0	0	0	0.16027	0.178041	0.070071	0	0.031671	0	0.065507	0.152957	10	0	0	0	19	20	8	0	4	0	7	16
ENSSSCG00000001233	chr7	22757794	22780232	-	TRIM26	100144460	ENSSSCT00000036524;ENSSSCT00000074988	GO:0005737(cytoplasm);GO:0008270(zinc ion binding);GO:0010468(regulation of gene expression);GO:0016567(protein ubiquitination);GO:0044790(suppression of viral release by host);GO:0045087(innate immune response);GO:0046597(negative regulation of viral entry into host cell);GO:0046872(metal ion binding);GO:0051091(positive regulation of DNA-binding transcription factor activity);GO:0061630(ubiquit…	NA	NA	NA	NA	tripartite motif containing 26 [Source:NCBI gene (formerly Entrezgene);Acc:100144460]	protein_coding	9.8247	10.2895	8.5055	9.79925	8.44654	7.22839	8.78729	8.99995	6.08793	5.12683	4.93058	6.15912	850	848	880	807	879	709	888	965	682	521	432	554
ENSSSCG00000001234	chr7	22717482	22731491	-	TRIM10	100144459	ENSSSCT00000001343	GO:0005737(cytoplasm);GO:0008270(zinc ion binding);GO:0030218(erythrocyte differentiation);GO:0045087(innate immune response);GO:0046597(negative regulation of viral entry into host cell);GO:0046872(metal ion binding)	NA	NA	NA	NA	tripartite motif containing 10 [Source:NCBI gene (formerly Entrezgene);Acc:100144459]	protein_coding	0.024836	0.026418	0	0.064013	0	0	0	0.020317	0	0	0	0	4	4	0	10	0	0	0	4	0	0	0	0
ENSSSCG00000001235	chr7	22731274	22742963	+	TRIM15	100144461	ENSSSCT00000080618	GO:0003713(transcription coactivator activity);GO:0005737(cytoplasm);GO:0008270(zinc ion binding);GO:0010468(regulation of gene expression);GO:0016567(protein ubiquitination);GO:0032481(positive regulation of type I interferon production);GO:0044790(suppression of viral release by host);GO:0045087(innate immune response);GO:0045893(positive regulation of DNA-templated transcription);GO:0046872(me…	NA	NA	NA	NA	tripartite motif containing 15 [Source:VGNC Symbol;Acc:VGNC:94395]	protein_coding	0	0.0375469	0	0	0	0	0	0	0.0212371	0	0	0	0	4	0	0	0	0	0	0	4	0	0	0
ENSSSCG00000001236	chr7	22702938	22714181	+	TRIM40	100294687	ENSSSCT00000098693;ENSSSCT00000051045	GO:0005737(cytoplasm);GO:0008270(zinc ion binding);GO:0008385(IkappaB kinase complex);GO:0010468(regulation of gene expression);GO:0016567(protein ubiquitination);GO:0032088(negative regulation of NF-kappaB transcription factor activity);GO:0042177(negative regulation of protein catabolic process);GO:0045087(innate immune response);GO:0045116(protein neddylation);GO:0046872(metal ion binding);GO:…	NA	NA	NA	NA	tripartite motif containing 40 [Source:VGNC Symbol;Acc:VGNC:94413]	protein_coding	0.0687	0	0	0.0532966	0.0128415	0	0	0	0	0	0	0	17	0	0	12	4	0	0	0	0	0	0	0
ENSSSCG00000001242	chr7	22548566	22578619	-	GABBR1	100141417,10537	ENSSSCT00000033757;ENSSSCT00000067078;ENSSSCT00000034718;ENSSSCT00000098887;ENSSSCT00000035175	GO:0004930(G protein-coupled receptor activity);GO:0004965(G protein-coupled GABA receptor activity);GO:0005737(cytoplasm);GO:0005886(plasma membrane);GO:0005887(integral component of plasma membrane);GO:0007165(signal transduction);GO:0007186(G protein-coupled receptor signaling pathway);GO:0007193(adenylate cyclase-inhibiting G protein-coupled receptor signaling pathway);GO:0007214(gamma-aminob…	04024(cAMP signaling pathway);04080(Neuroactive ligand-receptor interaction);04727(GABAergic synapse);04742(Taste transduction);04915(Estrogen signaling pathway);04929(GnRH secretion);05032(Morphine addiction);05032(Morphine addiction)	NA	NA	NA	gamma-aminobutyric acid type B receptor subunit 1 [Source:VGNC Symbol;Acc:VGNC:88297]	protein_coding	11.9938	15.4138	12.5092	22.4643	20.8038	12.3364	10.4446	9.06612	10.2603	15.1898	8.45181	11.3988	3498	4284	4365	6237	7295	4076	3559	3278	3874	5203	2496	3450
ENSSSCG00000001245	chr7	22626846	22631545	+	POLR1H	100152094	ENSSSCT00000001359	GO:0000428(DNA-directed RNA polymerase complex);GO:0003676(nucleic acid binding);GO:0005634(nucleus);GO:0005730(nucleolus);GO:0006351(DNA-templated transcription);GO:0006379(mRNA cleavage);GO:0008270(zinc ion binding);GO:0046872(metal ion binding)	03020(RNA polymerase)	NA	NA	NA	RNA polymerase I subunit H [Source:VGNC Symbol;Acc:VGNC:95316]	protein_coding	5.92281	6.67934	4.3909	6.66282	7.50733	6.08562	7.27844	7.65269	7.2366	5.74955	7.92385	6.12271	214	230	190	229	326	249	307	342	338	244	290	230
ENSSSCG00000001247	chr7	22605125	22612064	-	ZFP57	100141415	ENSSSCT00000001361	GO:0003682(chromatin binding);GO:0006349(regulation of gene expression by genomic imprinting);GO:0043045(DNA methylation involved in embryo development)	05168(Herpes simplex virus 1 infection)	NA	NA	zf-C2H2	ZFP57 zinc finger protein [Source:NCBI gene (formerly Entrezgene);Acc:100141415]	protein_coding	0.854368	1.48328	1.34603	1.58666	0.867222	0.641676	0.494398	0.442299	0.798431	0.848553	0.541766	0.929601	168	278	317	297	205	143	114	108	203	196	108	190
ENSSSCG00000001248	chr7	22595510	22610817	+	MOG	100141421	ENSSSCT00000001362	GO:0001817(regulation of cytokine production);GO:0005102(signaling receptor binding);GO:0007155(cell adhesion);GO:0009897(external side of plasma membrane);GO:0016020(membrane);GO:0016021(integral component of membrane);GO:0050852(T cell receptor signaling pathway)	NA	NA	NA	NA	myelin oligodendrocyte glycoprotein [Source:VGNC Symbol;Acc:VGNC:90296]	protein_coding	0.309961	0.382738	0.384444	0.335466	0.501754	0.121805	0.065079	0.145538	0.270825	0.17283	0.150746	0.133785	80	94	119	83	156	36	20	47	91	53	40	36
ENSSSCG00000001252	chr7	22501130	22503094	-	UBD	100294688	ENSSSCT00000035963	GO:0001650(fibrillar center);GO:0005634(nucleus);GO:0005654(nucleoplasm);GO:0005737(cytoplasm);GO:0006511(ubiquitin-dependent protein catabolic process);GO:0016235(aggresome);GO:0016567(protein ubiquitination);GO:0034341(response to interferon-gamma);GO:0034612(response to tumor necrosis factor);GO:0043011(myeloid dendritic cell differentiation);GO:0043065(positive regulation of apoptotic process…	NA	NA	NA	NA	ubiquitin D [Source:NCBI gene (formerly Entrezgene);Acc:100294688]	protein_coding	61.9689	48.1144	23.5991	13.7682	16.3637	21.5712	21.4241	32.4033	28.2597	38.2268	22.9207	27.9281	2064	1527	941	437	656	814	834	1338	1219	1496	773	966
ENSSSCG00000001253	chr7	22495108	22499611	+	OR2I1P		ENSSSCT00000001368	GO:0004930(G protein-coupled receptor activity);GO:0004984(olfactory receptor activity);GO:0007165(signal transduction);GO:0007186(G protein-coupled receptor signaling pathway);GO:0016020(membrane);GO:0016021(integral component of membrane);GO:0050911(detection of chemical stimulus involved in sensory perception of smell)	NA	NA	NA	NA	olfactory receptor family 2 subfamily I member 1 pseudogene [Source:HGNC Symbol;Acc:HGNC:8258]	protein_coding	0.059116	0.350924	0	0.328757	0.151253	0.136508	0.214707	0.052464	0.099914	0.08282	0.054296	0.06556	4	21	0	20	12	10	16	4	8	6	4	5
ENSSSCG00000001341	chr7	23004631	23015536	-	ENSSSCG00000001341		ENSSSCT00000035848;ENSSSCT00000048775	GO:0002476(antigen processing and presentation of endogenous peptide antigen via MHC class Ib);GO:0005615(extracellular space);GO:0006955(immune response);GO:0009897(external side of plasma membrane);GO:0016020(membrane);GO:0016021(integral component of membrane);GO:0019882(antigen processing and presentation);GO:0030670(phagocytic vesicle membrane);GO:0071556(integral component of lumenal side o…	NA	NA	NA	NA		protein_coding	179.86	204.212	84.249	128.133	120.491	88.4126	107.749	112.309	90.6025	158.093	69.1874	81.6677	21200	22937	11881	14380	17083	11807	14839	16403	13826	21890	8257	9994
ENSSSCG00000001342	chr7	23047520	23062487	+	TRIM39	100151742	ENSSSCT00000086539	GO:0005634(nucleus);GO:0005737(cytoplasm);GO:0005739(mitochondrion);GO:0005829(cytosol);GO:0007095(mitotic G2 DNA damage checkpoint signaling);GO:0008270(zinc ion binding);GO:0010468(regulation of gene expression);GO:0016567(protein ubiquitination);GO:0032435(negative regulation of proteasomal ubiquitin-dependent protein catabolic process);GO:0042802(identical protein binding);GO:0043124(negative…	NA	K12015	EC:2.3.2.27	NA	tripartite motif containing 39 [Source:NCBI gene (formerly Entrezgene);Acc:100151742]	protein_coding	4.86085	5.86158	4.64131	6.09633	5.66305	4.92696	4.68895	3.66943	4.22819	5.63592	3.8295	5.37282	589	677	673	703	825	676	664	551	663	802	470	676
[truncated: 24,918 more rows]
