# Supplementary material for: Transcriptomics characteristics and differentiation of subcutaneous adipose tissue among Huainan pigs and its hybrid genetic populations
Source: Front Vet Sci. 2025 May 22;12:1545694. doi: 10.3389/fvets.2025.1545694 (PMC12139212; doi:10.3389/fvets.2025.1545694)
Supplement: Supplementary file 2 [file Table_2.xlsx]

## Sheet: Sheet 1
Protein_A
