# Supplementary material for: Transcriptomics characteristics and differentiation of subcutaneous adipose tissue among Huainan pigs and its hybrid genetic populations
Source: Front Vet Sci. 2025 May 22;12:1545694. doi: 10.3389/fvets.2025.1545694 (PMC12139212; doi:10.3389/fvets.2025.1545694)
Supplement: Supplementary file 3 [file Table_3.xlsx]

## Sheet: Sheet1
gene_name	FPKM.BH1	FPKM.BH2	FPKM.BH3	FPKM.HN1	FPKM.HN2	FPKM.HN3
PDK4	5.74702	9.22026	2.77312	174.031	136.457	35.6738
SNORD14	108.584	68.8766	61.0288	9.4025	7.07677	4.878
TXNIP	141.28	186.841	127.064	1041.75	888.283	440.487
SLC25A33	79.8658	155.255	68.3747	11.2603	11.4202	19.5272
HOXC10	1.19971	2.21855	2.92679	0	0	0
NRIP3	13.7207	8.59584	10.4141	3.81914	3.55534	3.28103
WNT9B	0.127558	0.229179	0.129488	1.22233	0.961308	1.04944
DNAJB1	55.3311	38.2965	60.7677	16.9963	16.5015	17.3254
CD163	2.5739	1.32529	3.62101	14.6338	14.4248	11.5819
CPT1A	6.89248	5.56218	5.05739	23.2543	20.0516	11.9332
DPP6	1.23286	0.788699	0.131267	0.0159538	0	0.0124608
KLF9	17.8153	16.8643	17.3923	39.9167	37.5606	30.868
PLIN2	14.0749	11.2196	14.9448	42.0672	37.0337	26.401
ANGPTL4	11.2752	23.8518	9.36547	136.631	116.101	28.1016
ABCA1	2.12208	2.24815	3.16547	6.26204	5.26821	5.1105
