# Supplementary material for: Transcriptomics characteristics and differentiation of subcutaneous adipose tissue among Huainan pigs and its hybrid genetic populations
Source: Front Vet Sci. 2025 May 22;12:1545694. doi: 10.3389/fvets.2025.1545694 (PMC12139212; doi:10.3389/fvets.2025.1545694)
Supplement: Supplementary file 4 [file Table_4.xlsx]

## Sheet: Sheet1
gene_name	ABCA1	CPT1A	WNT9B	CD36	ACSL1	CCND2	ACSL1	PLIN2	LDLR	HMGCS1	ELOVL2	KLF9
FPKM.BH1	2.12208	6.89248	0.127558	3.48045	224.708	2.31401	224.708	14.0749	14.212	13.4822	0.367982	17.8153
FPKM.BH2	2.24815	5.56218	0.229179	1.93061	227.296	1.74252	227.296	11.2196	11.5656	11.5521	0.40294	16.8643
FPKM.BH3	3.16547	5.05739	0.129488	2.77495	147.404	1.74127	147.404	14.9448	7.88346	12.8221	0.516444	17.3923
FPKM.LH1	1.67099	7.91616	0.164543	1.6425	322.653	2.65981	322.653	15.3384	30.4241	28.2059	0.218122	11.3104
FPKM.LH2	1.26402	7.56375	0.058872	0.956883	433.388	2.34483	433.388	12.5375	29.9672	38.8225	0.269237	10.1787
FPKM.LH3	1.28396	5.82794	0.113326	1.76847	443.844	2.0857	443.844	11.411	19.4748	17.1937	0.275014	19.3212
FPKM.YH1	2.2119	6.63109	0.08171	2.24569	203.681	2.2395	203.681	15.214	16.0035	10.193	0.496892	18.0959
FPKM.YH2	1.97877	5.29289	0.088024	1.27234	571.673	2.26468	571.673	19.5088	12.5532	17.6806	0.331424	24.7609
FPKM.YH3	1.8457	6.21136	0.11439	1.56819	204.748	1.56766	204.748	19.3927	10.5859	10.3489	0.315334	37.3009
FPKM.HN1	6.26204	23.2543	1.22233	6.5817	126.333	0.690152	126.333	42.0672	14.2392	8.19791	1.52966	39.9167
FPKM.HN2	5.26821	20.0516	0.961308	6.48757	146.917	0.583219	146.917	37.0337	14.1627	8.91262	0.949173	37.5606
FPKM.HN3	5.1105	11.9332	1.04944	4.7748	249.176	0.877948	249.176	26.401	15.4238	11.455	0.363157	30.868
