# Supplementary material for: Transcriptomics characteristics and differentiation of subcutaneous adipose tissue among Huainan pigs and its hybrid genetic populations
Source: Front Vet Sci. 2025 May 22;12:1545694. doi: 10.3389/fvets.2025.1545694 (PMC12139212; doi:10.3389/fvets.2025.1545694)
Supplement: Supplementary file 5 [file Table_5.xlsx]

## Sheet: Sheet1
Sample	Raw Data		Valid Data		Valid Ratio(reads)	Q20%	Q30%	GC content%
	Read	Base	Read	Base
BH1	34861420	5.23G	33487360	5.02G	96.06	99.78	98.37	50
BH2	35148098	5.27G	33841794	5.08G	96.28	99.76	98.4	49
BH3	39384714	5.91G	38016996	5.70G	96.53	99.78	98.33	50.5
HN1	34527940	5.18G	33082598	4.96G	95.81	99.73	97.18	49.5
HN2	43297806	6.49G	41252724	6.19G	95.28	99.72	97.16	49.5
HN3	40457854	6.07G	38349308	5.75G	94.79	99.74	97.21	49.5
LH1	38395664	5.76G	37023718	5.55G	96.43	99.78	98.37	50.5
LH2	39629948	5.94G	38271138	5.74G	96.57	99.78	98.26	50.5
LH3	45232150	6.78G	43586246	6.54G	96.36	99.79	98.5	49.5
YH1	42524214	6.38G	40624370	6.09G	95.53	99.76	98.19	50.5
YH2	36394292	5.46G	35147434	5.27G	96.57	99.78	98.45	49.5
YH3	37746248	5.66G	36426646	5.46G	96.5	99.79	98.44	49.5
								598
								49.8333
