# Supplementary material for: Transcriptomics characteristics and differentiation of subcutaneous adipose tissue among Huainan pigs and its hybrid genetic populations
Source: Front Vet Sci. 2025 May 22;12:1545694. doi: 10.3389/fvets.2025.1545694 (PMC12139212; doi:10.3389/fvets.2025.1545694)
Supplement: Supplementary file 8 [file Table_8.xlsx]

## Sheet: Sheet1
Pathway_ID	KEGG_Level_1	KEGG_Level_2	Pathway_Name	P.value	Q.value	gene_id	gene_name	fc	log2(fc)	pval	qval	regulation	significant	FPKM.YH1	FPKM.YH2	FPKM.YH3	FPKM.HN1	FPKM.HN2	FPKM.HN3
ssc04061	Environmental Information Processing	Signaling molecules and interaction	Viral protein interaction with cytokine and cytokine receptor	1.70151e-10	4.37288e-08	ENSSSCG00000011322	CCR1	0.091636	-3.44794	3.63366e-13	2.97008e-10	down	yes	0.170582	0.590019	0.819318	5.88509	6.61595	4.74021
ssc04061	Environmental Information Processing	Signaling molecules and interaction	Viral protein interaction with cytokine and cytokine receptor	1.70151e-10	4.37288e-08	ENSSSCG00000012397	IL2RG	0.298773	-1.74288	1.05221e-11	5.80037e-09	down	yes	4.1612	2.96118	4.3484	15.2717	12.9891	10.1322
ssc04061	Environmental Information Processing	Signaling molecules and interaction	Viral protein interaction with cytokine and cytokine receptor	1.70151e-10	4.37288e-08	ENSSSCG00000024311	CCR2	0.108001	-3.21089	1.93508e-11	9.75939e-09	down	yes	0.211259	0.0428126	0.117214	1.46904	1.10976	0.859002
ssc04061	Environmental Information Processing	Signaling molecules and interaction	Viral protein interaction with cytokine and cytokine receptor	1.70151e-10	4.37288e-08	ENSSSCG00000009633	ENSSSCG00000009633	0.340632	-1.55371	4.99525e-10	2.00691e-07	down	yes	10.7651	11.8382	10.0347	39.7181	34.0498	22.0479
ssc04061	Environmental Information Processing	Signaling molecules and interaction	Viral protein interaction with cytokine and cytokine receptor	1.70151e-10	4.37288e-08	ENSSSCG00000014441	CSF1R	0.267402	-1.90292	5.30672e-09	1.61802e-06	down	yes	12.3228	4.42678	8.77211	36.1176	33.7569	25.5687
ssc04061	Environmental Information Processing	Signaling molecules and interaction	Viral protein interaction with cytokine and cytokine receptor	1.70151e-10	4.37288e-08	ENSSSCG00000036445	ENSSSCG00000036445	0.00635382	-7.29816	1.77316e-08	4.67012e-06	down	yes	0.044671	0	0	3.72274	3.09381	0.21403
ssc04061	Environmental Information Processing	Signaling molecules and interaction	Viral protein interaction with cytokine and cytokine receptor	1.70151e-10	4.37288e-08	ENSSSCG00000040648	CCL8	0.0895423	-3.48129	1.8336e-06	0.000280411	down	yes	0.259418	0.153283	0.232862	2.60082	3.79599	0.812776
ssc04061	Environmental Information Processing	Signaling molecules and interaction	Viral protein interaction with cytokine and cytokine receptor	1.70151e-10	4.37288e-08	ENSSSCG00000024344	CCR5	0.249042	-2.00554	4.44359e-06	0.000581938	down	yes	0.837351	0.312658	1.13779	3.60922	3.42421	2.15298
ssc04061	Environmental Information Processing	Signaling molecules and interaction	Viral protein interaction with cytokine and cytokine receptor	1.70151e-10	4.37288e-08	ENSSSCG00000015085	IL10RA	0.364607	-1.45559	8.77386e-06	0.000976412	down	yes	5.06632	2.05011	3.03242	10.5086	9.92731	7.39915
ssc04061	Environmental Information Processing	Signaling molecules and interaction	Viral protein interaction with cytokine and cytokine receptor	1.70151e-10	4.37288e-08	ENSSSCG00000038162	CCL21	0.170187	-2.55481	2.71717e-05	0.00232519	down	yes	1.08883	0.561409	0.467169	5.86505	5.62678	0.949821
ssc04061	Environmental Information Processing	Signaling molecules and interaction	Viral protein interaction with cytokine and cytokine receptor	1.70151e-10	4.37288e-08	ENSSSCG00000058071	ENSSSCG00000058071	0.305699	-1.70982	3.3132e-05	0.00274602	down	yes	3.6129	2.25998	5.42536	16.9983	14.0993	5.86118
ssc04061	Environmental Information Processing	Signaling molecules and interaction	Viral protein interaction with cytokine and cytokine receptor	1.70151e-10	4.37288e-08	ENSSSCG00000035736	ENSSSCG00000035736	0.46856	-1.09369	6.2182e-05	0.00445306	down	yes	18.7458	10.9806	17.8483	38.5785	37.6526	25.3027
ssc04061	Environmental Information Processing	Signaling molecules and interaction	Viral protein interaction with cytokine and cytokine receptor	1.70151e-10	4.37288e-08	ENSSSCG00000039416	CXCR4	0.353752	-1.49919	8.43721e-05	0.00557091	down	yes	2.88652	1.8953	2.56487	9.5084	7.60031	3.65923
ssc04061	Environmental Information Processing	Signaling molecules and interaction	Viral protein interaction with cytokine and cytokine receptor	1.70151e-10	4.37288e-08	ENSSSCG00000032777	CXCL9	0.40678	-1.29768	0.000110128	0.00688777	down	yes	2.68846	3.81436	5.40964	12.2936	9.62856	7.36256
ssc04061	Environmental Information Processing	Signaling molecules and interaction	Viral protein interaction with cytokine and cytokine receptor	1.70151e-10	4.37288e-08	ENSSSCG00000032343	CCL4	0.25394	-1.97744	0.000233644	0.0122413	down	yes	0.728731	1.46798	1.59811	7.38512	5.40678	2.15188
ssc04061	Environmental Information Processing	Signaling molecules and interaction	Viral protein interaction with cytokine and cytokine receptor	1.70151e-10	4.37288e-08	ENSSSCG00000026707	XCR1	0.220048	-2.18411	0.000486859	0.0211365	down	yes	0.038496	0.114752	0.138911	0.574444	0.374304	0.378958
ssc05133	Human Diseases	Infectious disease: bacterial	Pertussis	4.24086e-10	4.65457e-08	ENSSSCG00000013551	C3	0.273533	-1.87021	4.05676e-13	3.19253e-10	down	yes	1.3987	1.41272	1.78552	4.82431	5.37869	6.60276
ssc05133	Human Diseases	Infectious disease: bacterial	Pertussis	4.24086e-10	4.65457e-08	ENSSSCG00000017755	NOS2	0.297181	-1.75059	1.84656e-07	3.90812e-05	down	yes	2.46124	2.02222	2.07884	9.86271	8.36997	3.84918
ssc05133	Human Diseases	Infectious disease: bacterial	Pertussis	4.24086e-10	4.65457e-08	ENSSSCG00000025133	ITGB2	0.381078	-1.39184	2.91286e-07	5.70633e-05	down	yes	2.92941	1.79459	2.96807	5.92198	6.52439	7.73865
ssc05133	Human Diseases	Infectious disease: bacterial	Pertussis	4.24086e-10	4.65457e-08	ENSSSCG00000031912	JUN	2.12853	1.08985	7.09926e-07	0.000121065	up	yes	146.559	238.531	232.136	108.009	103.724	78.2458
ssc05133	Human Diseases	Infectious disease: bacterial	Pertussis	4.24086e-10	4.65457e-08	ENSSSCG00000014369	CD14	0.373648	-1.42025	2.43896e-06	0.000354681	down	yes	2.57021	3.02635	4.03999	10.4672	9.46869	5.85457
ssc05133	Human Diseases	Infectious disease: bacterial	Pertussis	4.24086e-10	4.65457e-08	ENSSSCG00000033512	C1QB	0.26517	-1.91501	4.73731e-06	0.00061029	down	yes	10.4582	3.23701	10.7569	39.6548	34.5555	18.0026
ssc05133	Human Diseases	Infectious disease: bacterial	Pertussis	4.24086e-10	4.65457e-08	ENSSSCG00000038706	C1QC	0.258447	-1.95206	7.68691e-06	0.000876807	down	yes	22.6937	5.30699	16.674	71.3082	65.8292	35.7209
ssc05133	Human Diseases	Infectious disease: bacterial	Pertussis	4.24086e-10	4.65457e-08	ENSSSCG00000003524	C1QA	0.251856	-1.98933	3.82937e-05	0.00308746	down	yes	12.7526	3.09395	14.2621	53.4073	45.0747	21.0653
ssc05133	Human Diseases	Infectious disease: bacterial	Pertussis	4.24086e-10	4.65457e-08	ENSSSCG00000005503	TLR4	0.48183	-1.0534	4.41424e-05	0.00341945	down	yes	1.89913	1.43729	1.84978	4.41603	3.74549	2.60203
ssc05133	Human Diseases	Infectious disease: bacterial	Pertussis	4.24086e-10	4.65457e-08	ENSSSCG00000039214	ENSSSCG00000039214	0.0285872	-5.12849	6.6841e-05	0.00472955	down	yes	0.071811	0	0	1.28911	1.08481	0.138086
ssc05133	Human Diseases	Infectious disease: bacterial	Pertussis	4.24086e-10	4.65457e-08	ENSSSCG00000002383	FOS	2.65249	1.40735	0.000341806	0.0164344	up	yes	51.7257	134.672	160.001	61.4612	50.8367	18.2962
ssc05133	Human Diseases	Infectious disease: bacterial	Pertussis	4.24086e-10	4.65457e-08	ENSSSCG00000008090	IL1A	0.0874798	-3.51491	0.000343591	0.0164868	down	yes	0	0.138294	0.158153	1.4831	1.47258	0.433082
ssc05133	Human Diseases	Infectious disease: bacterial	Pertussis	4.24086e-10	4.65457e-08	ENSSSCG00000034980	IRF8	0.29554	-1.75857	0.000621275	0.0249605	down	yes	4.41152	1.38605	2.03684	12.3192	10.8889	3.30064
ssc05133	Human Diseases	Infectious disease: bacterial	Pertussis	4.24086e-10	4.65457e-08	ENSSSCG00000015662	ENSSSCG00000015662	0.0503368	-4.31224	0.00138277	0.0455873	down	yes	0.024658	0	0	0.133727	0.0838976	0.272234
ssc05133	Human Diseases	Infectious disease: bacterial	Pertussis	4.24086e-10	4.65457e-08	ENSSSCG00000001427	C4A	0.426905	-1.22801	0.00154184	0.0492557	down	yes	10.1454	6.08694	11.4747	30.1364	24.6872	10.0787
ssc04145	Cellular Processes	Transport and catabolism	Phagosome	5.43336e-10	4.65457e-08	ENSSSCG00000006979	MSR1	0.0907487	-3.46198	2.5876e-22	1.53341e-18	down	yes	0.536002	0.523539	1.24071	8.53187	8.62141	8.19424
ssc04145	Cellular Processes	Transport and catabolism	Phagosome	5.43336e-10	4.65457e-08	ENSSSCG00000006648	CTSS	0.370464	-1.4326	1.14189e-18	3.86676e-15	down	yes	18.1443	14.7939	17.6091	47.4559	45.3548	43.6326
ssc04145	Cellular Processes	Transport and catabolism	Phagosome	5.43336e-10	4.65457e-08	ENSSSCG00000036246	GP91-PHOX	0.200829	-2.31596	4.81254e-17	1.14077e-13	down	yes	1.41299	0.869504	1.42653	7.58359	6.22046	4.66449
ssc04145	Cellular Processes	Transport and catabolism	Phagosome	5.43336e-10	4.65457e-08	ENSSSCG00000036352	RAB7B	0.211099	-2.24401	2.62719e-13	2.23924e-10	down	yes	0.533683	0.660679	0.64241	2.36503	3.20816	3.12778
ssc04145	Cellular Processes	Transport and catabolism	Phagosome	5.43336e-10	4.65457e-08	ENSSSCG00000013551	C3	0.273533	-1.87021	4.05676e-13	3.19253e-10	down	yes	1.3987	1.41272	1.78552	4.82431	5.37869	6.60276
ssc04145	Cellular Processes	Transport and catabolism	Phagosome	5.43336e-10	4.65457e-08	ENSSSCG00000009002	TLR2	0.261758	-1.9337	1.45329e-12	9.84254e-10	down	yes	0.242131	0.198378	0.235175	0.963629	0.920697	0.697003
ssc04145	Cellular Processes	Transport and catabolism	Phagosome	5.43336e-10	4.65457e-08	ENSSSCG00000011038	MRC1	0.150544	-2.73174	4.05411e-10	1.68594e-07	down	yes	1.0347	0.259729	1.05702	6.50195	5.39286	3.72484
ssc04145	Cellular Processes	Transport and catabolism	Phagosome	5.43336e-10	4.65457e-08	ENSSSCG00000015405	ENSSSCG00000015405	0.285037	-1.81078	4.64856e-09	1.46919e-06	down	yes	2.24569	1.27234	1.56819	6.5817	6.48757	4.7748
ssc04145	Cellular Processes	Transport and catabolism	Phagosome	5.43336e-10	4.65457e-08	ENSSSCG00000015559	NCF2	0.284689	-1.81254	3.01621e-08	7.37074e-06	down	yes	4.1099	5.70611	3.65919	20.5328	16.8971	9.90324
ssc04145	Cellular Processes	Transport and catabolism	Phagosome	5.43336e-10	4.65457e-08	ENSSSCG00000025133	ITGB2	0.381078	-1.39184	2.91286e-07	5.70633e-05	down	yes	2.92941	1.79459	2.96807	5.92198	6.52439	7.73865
ssc04145	Cellular Processes	Transport and catabolism	Phagosome	5.43336e-10	4.65457e-08	ENSSSCG00000052432	ENSSSCG00000052432	0.352776	-1.50318	6.48008e-07	0.000112119	down	yes	243.665	117.407	228.564	668.892	616.582	385.948
ssc04145	Cellular Processes	Transport and catabolism	Phagosome	5.43336e-10	4.65457e-08	ENSSSCG00000000137	NCF4	0.258713	-1.95058	2.37138e-06	0.000346983	down	yes	0.775695	0.438192	0.616963	3.47558	2.49187	1.10932
ssc04145	Cellular Processes	Transport and catabolism	Phagosome	5.43336e-10	4.65457e-08	ENSSSCG00000014369	CD14	0.373648	-1.42025	2.43896e-06	0.000354681	down	yes	2.57021	3.02635	4.03999	10.4672	9.46869	5.85457
ssc04145	Cellular Processes	Transport and catabolism	Phagosome	5.43336e-10	4.65457e-08	ENSSSCG00000031493	CYBA	0.484405	-1.04571	6.1941e-06	0.000744135	down	yes	18.5076	12.3092	16.8515	34.3191	35.7459	28.3407
ssc04145	Cellular Processes	Transport and catabolism	Phagosome	5.43336e-10	4.65457e-08	ENSSSCG00000000647	OLR1	0.380023	-1.39584	7.14491e-06	0.000830211	down	yes	1.69826	1.9816	1.29141	5.10255	4.4909	3.48806
ssc04145	Cellular Processes	Transport and catabolism	Phagosome	5.43336e-10	4.65457e-08	ENSSSCG00000007722	NCF1	0.251899	-1.98908	3.84727e-05	0.00309138	down	yes	0.231731	0.167342	0.273456	1.11024	0.940043	0.619553
ssc04145	Cellular Processes	Transport and catabolism	Phagosome	5.43336e-10	4.65457e-08	ENSSSCG00000005503	TLR4	0.48183	-1.0534	4.41424e-05	0.00341945	down	yes	1.89913	1.43729	1.84978	4.41603	3.74549	2.60203
ssc04145	Cellular Processes	Transport and catabolism	Phagosome	5.43336e-10	4.65457e-08	ENSSSCG00000006350	ENSSSCG00000006350	0.252899	-1.98337	6.82436e-05	0.00477181	down	yes	5.61981	0.947202	3.26057	16.1536	13.7744	8.93164
ssc04145	Cellular Processes	Transport and catabolism	Phagosome	5.43336e-10	4.65457e-08	ENSSSCG00000001229	ENSSSCG00000001229	0.42378	-1.23861	7.47488e-05	0.00511122	down	yes	92.9244	55.0207	64.4142	218.512	183.604	98.9914
ssc04145	Cellular Processes	Transport and catabolism	Phagosome	5.43336e-10	4.65457e-08	ENSSSCG00000040397	COLEC12	0.403508	-1.30933	0.000190837	0.0105445	down	yes	2.6295	1.14668	1.62913	5.63291	4.06796	3.69491
ssc05140	Human Diseases	Infectious disease: parasitic	Leishmaniasis	1.58791e-09	1.02023e-07	ENSSSCG00000036246	GP91-PHOX	0.200829	-2.31596	4.81254e-17	1.14077e-13	down	yes	1.41299	0.869504	1.42653	7.58359	6.22046	4.66449
ssc05140	Human Diseases	Infectious disease: parasitic	Leishmaniasis	1.58791e-09	1.02023e-07	ENSSSCG00000013551	C3	0.273533	-1.87021	4.05676e-13	3.19253e-10	down	yes	1.3987	1.41272	1.78552	4.82431	5.37869	6.60276
ssc05140	Human Diseases	Infectious disease: parasitic	Leishmaniasis	1.58791e-09	1.02023e-07	ENSSSCG00000009002	TLR2	0.261758	-1.9337	1.45329e-12	9.84254e-10	down	yes	0.242131	0.198378	0.235175	0.963629	0.920697	0.697003
ssc05140	Human Diseases	Infectious disease: parasitic	Leishmaniasis	1.58791e-09	1.02023e-07	ENSSSCG00000015559	NCF2	0.284689	-1.81254	3.01621e-08	7.37074e-06	down	yes	4.1099	5.70611	3.65919	20.5328	16.8971	9.90324
ssc05140	Human Diseases	Infectious disease: parasitic	Leishmaniasis	1.58791e-09	1.02023e-07	ENSSSCG00000017755	NOS2	0.297181	-1.75059	1.84656e-07	3.90812e-05	down	yes	2.46124	2.02222	2.07884	9.86271	8.36997	3.84918
ssc05140	Human Diseases	Infectious disease: parasitic	Leishmaniasis	1.58791e-09	1.02023e-07	ENSSSCG00000025133	ITGB2	0.381078	-1.39184	2.91286e-07	5.70633e-05	down	yes	2.92941	1.79459	2.96807	5.92198	6.52439	7.73865
ssc05140	Human Diseases	Infectious disease: parasitic	Leishmaniasis	1.58791e-09	1.02023e-07	ENSSSCG00000031912	JUN	2.12853	1.08985	7.09926e-07	0.000121065	up	yes	146.559	238.531	232.136	108.009	103.724	78.2458
ssc05140	Human Diseases	Infectious disease: parasitic	Leishmaniasis	1.58791e-09	1.02023e-07	ENSSSCG00000000137	NCF4	0.258713	-1.95058	2.37138e-06	0.000346983	down	yes	0.775695	0.438192	0.616963	3.47558	2.49187	1.10932
ssc05140	Human Diseases	Infectious disease: parasitic	Leishmaniasis	1.58791e-09	1.02023e-07	ENSSSCG00000031493	CYBA	0.484405	-1.04571	6.1941e-06	0.000744135	down	yes	18.5076	12.3092	16.8515	34.3191	35.7459	28.3407
ssc05140	Human Diseases	Infectious disease: parasitic	Leishmaniasis	1.58791e-09	1.02023e-07	ENSSSCG00000007722	NCF1	0.251899	-1.98908	3.84727e-05	0.00309138	down	yes	0.231731	0.167342	0.273456	1.11024	0.940043	0.619553
ssc05140	Human Diseases	Infectious disease: parasitic	Leishmaniasis	1.58791e-09	1.02023e-07	ENSSSCG00000005503	TLR4	0.48183	-1.0534	4.41424e-05	0.00341945	down	yes	1.89913	1.43729	1.84978	4.41603	3.74549	2.60203
ssc05140	Human Diseases	Infectious disease: parasitic	Leishmaniasis	1.58791e-09	1.02023e-07	ENSSSCG00000039214	ENSSSCG00000039214	0.0285872	-5.12849	6.6841e-05	0.00472955	down	yes	0.071811	0	0	1.28911	1.08481	0.138086
ssc05140	Human Diseases	Infectious disease: parasitic	Leishmaniasis	1.58791e-09	1.02023e-07	ENSSSCG00000002383	FOS	2.65249	1.40735	0.000341806	0.0164344	up	yes	51.7257	134.672	160.001	61.4612	50.8367	18.2962
ssc05140	Human Diseases	Infectious disease: parasitic	Leishmaniasis	1.58791e-09	1.02023e-07	ENSSSCG00000008090	IL1A	0.0874798	-3.51491	0.000343591	0.0164868	down	yes	0	0.138294	0.158153	1.4831	1.47258	0.433082
ssc04380	Organismal Systems	Development and regeneration	Osteoclast differentiation	1.26944e-08	6.52492e-07	ENSSSCG00000014441	CSF1R	0.267402	-1.90292	5.30672e-09	1.61802e-06	down	yes	12.3228	4.42678	8.77211	36.1176	33.7569	25.5687
ssc04380	Organismal Systems	Development and regeneration	Osteoclast differentiation	1.26944e-08	6.52492e-07	ENSSSCG00000039270	TREM2	0.166833	-2.58352	2.69894e-08	6.66413e-06	down	yes	0.402352	0.259433	0.454467	3.05919	2.18201	1.44963
ssc04380	Organismal Systems	Development and regeneration	Osteoclast differentiation	1.26944e-08	6.52492e-07	ENSSSCG00000015559	NCF2	0.284689	-1.81254	3.01621e-08	7.37074e-06	down	yes	4.1099	5.70611	3.65919	20.5328	16.8971	9.90324
ssc04380	Organismal Systems	Development and regeneration	Osteoclast differentiation	1.26944e-08	6.52492e-07	ENSSSCG00000013237	SPI1	0.398203	-1.32842	4.06709e-07	7.41587e-05	down	yes	11.5438	7.67205	9.23279	28.2218	26.2191	17.0016
ssc04380	Organismal Systems	Development and regeneration	Osteoclast differentiation	1.26944e-08	6.52492e-07	ENSSSCG00000059775	ENSSSCG00000059775	0.198438	-2.33324	4.80752e-07	8.63314e-05	down	yes	0.499927	0.840199	2.0002	6.68056	5.80912	4.34345
ssc04380	Organismal Systems	Development and regeneration	Osteoclast differentiation	1.26944e-08	6.52492e-07	ENSSSCG00000031912	JUN	2.12853	1.08985	7.09926e-07	0.000121065	up	yes	146.559	238.531	232.136	108.009	103.724	78.2458
ssc04380	Organismal Systems	Development and regeneration	Osteoclast differentiation	1.26944e-08	6.52492e-07	ENSSSCG00000000137	NCF4	0.258713	-1.95058	2.37138e-06	0.000346983	down	yes	0.775695	0.438192	0.616963	3.47558	2.49187	1.10932
ssc04380	Organismal Systems	Development and regeneration	Osteoclast differentiation	1.26944e-08	6.52492e-07	ENSSSCG00000031493	CYBA	0.484405	-1.04571	6.1941e-06	0.000744135	down	yes	18.5076	12.3092	16.8515	34.3191	35.7459	28.3407
ssc04380	Organismal Systems	Development and regeneration	Osteoclast differentiation	1.26944e-08	6.52492e-07	ENSSSCG00000010504	BLNK	0.330236	-1.59843	1.05918e-05	0.00113509	down	yes	0.491579	0.242817	0.407969	1.48911	1.03319	0.936934
ssc04380	Organismal Systems	Development and regeneration	Osteoclast differentiation	1.26944e-08	6.52492e-07	ENSSSCG00000002919	TYROBP	0.377612	-1.40502	1.36692e-05	0.00137295	down	yes	15.3479	6.77388	10.8878	31.6351	31.5736	24.2078
ssc04380	Organismal Systems	Development and regeneration	Osteoclast differentiation	1.26944e-08	6.52492e-07	ENSSSCG00000007722	NCF1	0.251899	-1.98908	3.84727e-05	0.00309138	down	yes	0.231731	0.167342	0.273456	1.11024	0.940043	0.619553
ssc04380	Organismal Systems	Development and regeneration	Osteoclast differentiation	1.26944e-08	6.52492e-07	ENSSSCG00000039214	ENSSSCG00000039214	0.0285872	-5.12849	6.6841e-05	0.00472955	down	yes	0.071811	0	0	1.28911	1.08481	0.138086
ssc04380	Organismal Systems	Development and regeneration	Osteoclast differentiation	1.26944e-08	6.52492e-07	ENSSSCG00000006350	ENSSSCG00000006350	0.252899	-1.98337	6.82436e-05	0.00477181	down	yes	5.61981	0.947202	3.26057	16.1536	13.7744	8.93164
ssc04380	Organismal Systems	Development and regeneration	Osteoclast differentiation	1.26944e-08	6.52492e-07	ENSSSCG00000017006	LCP2	0.344998	-1.53534	0.000108824	0.00682426	down	yes	1.09894	0.846338	1.38263	4.3203	3.84813	1.47774
ssc04380	Organismal Systems	Development and regeneration	Osteoclast differentiation	1.26944e-08	6.52492e-07	ENSSSCG00000002383	FOS	2.65249	1.40735	0.000341806	0.0164344	up	yes	51.7257	134.672	160.001	61.4612	50.8367	18.2962
ssc04380	Organismal Systems	Development and regeneration	Osteoclast differentiation	1.26944e-08	6.52492e-07	ENSSSCG00000008090	IL1A	0.0874798	-3.51491	0.000343591	0.0164868	down	yes	0	0.138294	0.158153	1.4831	1.47258	0.433082
ssc04380	Organismal Systems	Development and regeneration	Osteoclast differentiation	1.26944e-08	6.52492e-07	ENSSSCG00000037426	ENSSSCG00000037426	0.15617	-2.67881	0.00132464	0.0439765	down	yes	0.136312	0.044217	0.046139	0.429557	0.602009	0.419856
ssc04610	Organismal Systems	Immune system	Complement and coagulation cascades	7.85954e-08	3.3665e-06	ENSSSCG00000035170	VSIG4	0.185062	-2.43392	8.36161e-15	1.04318e-11	down	yes	1.93579	0.831678	1.63048	8.80996	7.81079	7.14397
ssc04610	Organismal Systems	Immune system	Complement and coagulation cascades	7.85954e-08	3.3665e-06	ENSSSCG00000013551	C3	0.273533	-1.87021	4.05676e-13	3.19253e-10	down	yes	1.3987	1.41272	1.78552	4.82431	5.37869	6.60276
ssc04610	Organismal Systems	Immune system	Complement and coagulation cascades	7.85954e-08	3.3665e-06	ENSSSCG00000007032	PLAT	0.3529	-1.50267	7.32948e-13	5.10994e-10	down	yes	14.0966	15.9588	15.708	50.3654	45.4785	33.8341
ssc04610	Organismal Systems	Immune system	Complement and coagulation cascades	7.85954e-08	3.3665e-06	ENSSSCG00000056729	C5AR1	0.236098	-2.08254	2.28788e-12	1.46573e-09	down	yes	2.21547	1.21498	1.25217	6.60772	6.98553	6.24011
ssc04610	Organismal Systems	Immune system	Complement and coagulation cascades	7.85954e-08	3.3665e-06	ENSSSCG00000025133	ITGB2	0.381078	-1.39184	2.91286e-07	5.70633e-05	down	yes	2.92941	1.79459	2.96807	5.92198	6.52439	7.73865
ssc04610	Organismal Systems	Immune system	Complement and coagulation cascades	7.85954e-08	3.3665e-06	ENSSSCG00000033512	C1QB	0.26517	-1.91501	4.73731e-06	0.00061029	down	yes	10.4582	3.23701	10.7569	39.6548	34.5555	18.0026
ssc04610	Organismal Systems	Immune system	Complement and coagulation cascades	7.85954e-08	3.3665e-06	ENSSSCG00000038706	C1QC	0.258447	-1.95206	7.68691e-06	0.000876807	down	yes	22.6937	5.30699	16.674	71.3082	65.8292	35.7209
ssc04610	Organismal Systems	Immune system	Complement and coagulation cascades	7.85954e-08	3.3665e-06	ENSSSCG00000009668	CLU	0.362669	-1.46327	1.14805e-05	0.00118836	down	yes	13.9304	28.325	22.7437	54.3621	52.9625	71.8996
ssc04610	Organismal Systems	Immune system	Complement and coagulation cascades	7.85954e-08	3.3665e-06	ENSSSCG00000016856	C9	0.46333	-1.10989	1.55398e-05	0.00152213	down	yes	14.5487	9.88828	8.37926	25.4552	24.1392	21.2326
ssc04610	Organismal Systems	Immune system	Complement and coagulation cascades	7.85954e-08	3.3665e-06	ENSSSCG00000003524	C1QA	0.251856	-1.98933	3.82937e-05	0.00308746	down	yes	12.7526	3.09395	14.2621	53.4073	45.0747	21.0653
ssc04610	Organismal Systems	Immune system	Complement and coagulation cascades	7.85954e-08	3.3665e-06	ENSSSCG00000024310	F13A1	0.262015	-1.93228	0.000163606	0.00937318	down	yes	2.29022	0.342431	1.85476	6.6358	5.91148	4.57922
ssc04610	Organismal Systems	Immune system	Complement and coagulation cascades	7.85954e-08	3.3665e-06	ENSSSCG00000015662	ENSSSCG00000015662	0.0503368	-4.31224	0.00138277	0.0455873	down	yes	0.024658	0	0	0.133727	0.0838976	0.272234
ssc04610	Organismal Systems	Immune system	Complement and coagulation cascades	7.85954e-08	3.3665e-06	ENSSSCG00000001427	C4A	0.426905	-1.22801	0.00154184	0.0492557	down	yes	10.1454	6.08694	11.4747	30.1364	24.6872	10.0787
ssc04060	Environmental Information Processing	Signaling molecules and interaction	Cytokine-cytokine receptor interaction	3.42341e-06	0.000125688	ENSSSCG00000025795	CSF3R	0.0895656	-3.48091	1.83938e-18	5.45008e-15	down	yes	0.208293	0.260524	0.293348	2.10886	2.55495	3.84578
ssc04060	Environmental Information Processing	Signaling molecules and interaction	Cytokine-cytokine receptor interaction	3.42341e-06	0.000125688	ENSSSCG00000011322	CCR1	0.091636	-3.44794	3.63366e-13	2.97008e-10	down	yes	0.170582	0.590019	0.819318	5.88509	6.61595	4.74021
ssc04060	Environmental Information Processing	Signaling molecules and interaction	Cytokine-cytokine receptor interaction	3.42341e-06	0.000125688	ENSSSCG00000012397	IL2RG	0.298773	-1.74288	1.05221e-11	5.80037e-09	down	yes	4.1612	2.96118	4.3484	15.2717	12.9891	10.1322
ssc04060	Environmental Information Processing	Signaling molecules and interaction	Cytokine-cytokine receptor interaction	3.42341e-06	0.000125688	ENSSSCG00000024311	CCR2	0.108001	-3.21089	1.93508e-11	9.75939e-09	down	yes	0.211259	0.0428126	0.117214	1.46904	1.10976	0.859002
ssc04060	Environmental Information Processing	Signaling molecules and interaction	Cytokine-cytokine receptor interaction	3.42341e-06	0.000125688	ENSSSCG00000009633	ENSSSCG00000009633	0.340632	-1.55371	4.99525e-10	2.00691e-07	down	yes	10.7651	11.8382	10.0347	39.7181	34.0498	22.0479
ssc04060	Environmental Information Processing	Signaling molecules and interaction	Cytokine-cytokine receptor interaction	3.42341e-06	0.000125688	ENSSSCG00000014441	CSF1R	0.267402	-1.90292	5.30672e-09	1.61802e-06	down	yes	12.3228	4.42678	8.77211	36.1176	33.7569	25.5687
ssc04060	Environmental Information Processing	Signaling molecules and interaction	Cytokine-cytokine receptor interaction	3.42341e-06	0.000125688	ENSSSCG00000036445	ENSSSCG00000036445	0.00635382	-7.29816	1.77316e-08	4.67012e-06	down	yes	0.044671	0	0	3.72274	3.09381	0.21403
ssc04060	Environmental Information Processing	Signaling molecules and interaction	Cytokine-cytokine receptor interaction	3.42341e-06	0.000125688	ENSSSCG00000025188	LEPR	0.0791261	-3.6597	1.14459e-07	2.60878e-05	down	yes	0.0386506	0.00801101	0.0293131	0.470512	0.353102	0.136558
ssc04060	Environmental Information Processing	Signaling molecules and interaction	Cytokine-cytokine receptor interaction	3.42341e-06	0.000125688	ENSSSCG00000040648	CCL8	0.0895423	-3.48129	1.8336e-06	0.000280411	down	yes	0.259418	0.153283	0.232862	2.60082	3.79599	0.812776
ssc04060	Environmental Information Processing	Signaling molecules and interaction	Cytokine-cytokine receptor interaction	3.42341e-06	0.000125688	ENSSSCG00000024344	CCR5	0.249042	-2.00554	4.44359e-06	0.000581938	down	yes	0.837351	0.312658	1.13779	3.60922	3.42421	2.15298
ssc04060	Environmental Information Processing	Signaling molecules and interaction	Cytokine-cytokine receptor interaction	3.42341e-06	0.000125688	ENSSSCG00000015085	IL10RA	0.364607	-1.45559	8.77386e-06	0.000976412	down	yes	5.06632	2.05011	3.03242	10.5086	9.92731	7.39915
ssc04060	Environmental Information Processing	Signaling molecules and interaction	Cytokine-cytokine receptor interaction	3.42341e-06	0.000125688	ENSSSCG00000000136	CSF2RB	0.259822	-1.9444	1.87754e-05	0.00176608	down	yes	0.974381	0.346324	0.321221	2.61115	2.19017	1.5181
ssc04060	Environmental Information Processing	Signaling molecules and interaction	Cytokine-cytokine receptor interaction	3.42341e-06	0.000125688	ENSSSCG00000038162	CCL21	0.170187	-2.55481	2.71717e-05	0.00232519	down	yes	1.08883	0.561409	0.467169	5.86505	5.62678	0.949821
ssc04060	Environmental Information Processing	Signaling molecules and interaction	Cytokine-cytokine receptor interaction	3.42341e-06	0.000125688	ENSSSCG00000058071	ENSSSCG00000058071	0.305699	-1.70982	3.3132e-05	0.00274602	down	yes	3.6129	2.25998	5.42536	16.9983	14.0993	5.86118
ssc04060	Environmental Information Processing	Signaling molecules and interaction	Cytokine-cytokine receptor interaction	3.42341e-06	0.000125688	ENSSSCG00000035736	ENSSSCG00000035736	0.46856	-1.09369	6.2182e-05	0.00445306	down	yes	18.7458	10.9806	17.8483	38.5785	37.6526	25.3027
ssc04060	Environmental Information Processing	Signaling molecules and interaction	Cytokine-cytokine receptor interaction	3.42341e-06	0.000125688	ENSSSCG00000039214	ENSSSCG00000039214	0.0285872	-5.12849	6.6841e-05	0.00472955	down	yes	0.071811	0	0	1.28911	1.08481	0.138086
ssc04060	Environmental Information Processing	Signaling molecules and interaction	Cytokine-cytokine receptor interaction	3.42341e-06	0.000125688	ENSSSCG00000039416	CXCR4	0.353752	-1.49919	8.43721e-05	0.00557091	down	yes	2.88652	1.8953	2.56487	9.5084	7.60031	3.65923
ssc04060	Environmental Information Processing	Signaling molecules and interaction	Cytokine-cytokine receptor interaction	3.42341e-06	0.000125688	ENSSSCG00000032777	CXCL9	0.40678	-1.29768	0.000110128	0.00688777	down	yes	2.68846	3.81436	5.40964	12.2936	9.62856	7.36256
ssc04060	Environmental Information Processing	Signaling molecules and interaction	Cytokine-cytokine receptor interaction	3.42341e-06	0.000125688	ENSSSCG00000032343	CCL4	0.25394	-1.97744	0.000233644	0.0122413	down	yes	0.728731	1.46798	1.59811	7.38512	5.40678	2.15188
ssc04060	Environmental Information Processing	Signaling molecules and interaction	Cytokine-cytokine receptor interaction	3.42341e-06	0.000125688	ENSSSCG00000008090	IL1A	0.0874798	-3.51491	0.000343591	0.0164868	down	yes	0	0.138294	0.158153	1.4831	1.47258	0.433082
ssc04060	Environmental Information Processing	Signaling molecules and interaction	Cytokine-cytokine receptor interaction	3.42341e-06	0.000125688	ENSSSCG00000026707	XCR1	0.220048	-2.18411	0.000486859	0.0211365	down	yes	0.038496	0.114752	0.138911	0.574444	0.374304	0.378958
ssc04062	Organismal Systems	Immune system	Chemokine signaling pathway	1.51056e-05	0.000485268	ENSSSCG00000011322	CCR1	0.091636	-3.44794	3.63366e-13	2.97008e-10	down	yes	0.170582	0.590019	0.819318	5.88509	6.61595	4.74021
ssc04062	Organismal Systems	Immune system	Chemokine signaling pathway	1.51056e-05	0.000485268	ENSSSCG00000024311	CCR2	0.108001	-3.21089	1.93508e-11	9.75939e-09	down	yes	0.211259	0.0428126	0.117214	1.46904	1.10976	0.859002
ssc04062	Organismal Systems	Immune system	Chemokine signaling pathway	1.51056e-05	0.000485268	ENSSSCG00000014852	ARRB1	0.409585	-1.28776	4.25724e-10	1.73989e-07	down	yes	4.0559	2.85499	3.12716	9.11295	8.37177	7.02312
ssc04062	Organismal Systems	Immune system	Chemokine signaling pathway	1.51056e-05	0.000485268	ENSSSCG00000036445	ENSSSCG00000036445	0.00635382	-7.29816	1.77316e-08	4.67012e-06	down	yes	0.044671	0	0	3.72274	3.09381	0.21403
ssc04062	Organismal Systems	Immune system	Chemokine signaling pathway	1.51056e-05	0.000485268	ENSSSCG00000013553	VAV1	0.288444	-1.79363	3.42588e-08	8.28644e-06	down	yes	1.22791	0.625221	1.31869	4.30399	3.77463	2.91766
ssc04062	Organismal Systems	Immune system	Chemokine signaling pathway	1.51056e-05	0.000485268	ENSSSCG00000040648	CCL8	0.0895423	-3.48129	1.8336e-06	0.000280411	down	yes	0.259418	0.153283	0.232862	2.60082	3.79599	0.812776
ssc04062	Organismal Systems	Immune system	Chemokine signaling pathway	1.51056e-05	0.000485268	ENSSSCG00000024344	CCR5	0.249042	-2.00554	4.44359e-06	0.000581938	down	yes	0.837351	0.312658	1.13779	3.60922	3.42421	2.15298
ssc04062	Organismal Systems	Immune system	Chemokine signaling pathway	1.51056e-05	0.000485268	ENSSSCG00000017991	PIK3R5	0.434454	-1.20272	1.8338e-05	0.00173181	down	yes	1.1792	0.846518	1.06752	2.17675	2.86488	2.07819
ssc04062	Organismal Systems	Immune system	Chemokine signaling pathway	1.51056e-05	0.000485268	ENSSSCG00000038162	CCL21	0.170187	-2.55481	2.71717e-05	0.00232519	down	yes	1.08883	0.561409	0.467169	5.86505	5.62678	0.949821
ssc04062	Organismal Systems	Immune system	Chemokine signaling pathway	1.51056e-05	0.000485268	ENSSSCG00000007722	NCF1	0.251899	-1.98908	3.84727e-05	0.00309138	down	yes	0.231731	0.167342	0.273456	1.11024	0.940043	0.619553
ssc04062	Organismal Systems	Immune system	Chemokine signaling pathway	1.51056e-05	0.000485268	ENSSSCG00000035736	ENSSSCG00000035736	0.46856	-1.09369	6.2182e-05	0.00445306	down	yes	18.7458	10.9806	17.8483	38.5785	37.6526	25.3027
ssc04062	Organismal Systems	Immune system	Chemokine signaling pathway	1.51056e-05	0.000485268	ENSSSCG00000039416	CXCR4	0.353752	-1.49919	8.43721e-05	0.00557091	down	yes	2.88652	1.8953	2.56487	9.5084	7.60031	3.65923
ssc04062	Organismal Systems	Immune system	Chemokine signaling pathway	1.51056e-05	0.000485268	ENSSSCG00000032777	CXCL9	0.40678	-1.29768	0.000110128	0.00688777	down	yes	2.68846	3.81436	5.40964	12.2936	9.62856	7.36256
ssc04062	Organismal Systems	Immune system	Chemokine signaling pathway	1.51056e-05	0.000485268	ENSSSCG00000039841	SHC3	0.0303958	-5.03999	0.000150148	0.00883263	down	yes	0	0	0.0177165	0.192635	0.123226	0.267002
ssc04062	Organismal Systems	Immune system	Chemokine signaling pathway	1.51056e-05	0.000485268	ENSSSCG00000032343	CCL4	0.25394	-1.97744	0.000233644	0.0122413	down	yes	0.728731	1.46798	1.59811	7.38512	5.40678	2.15188
ssc04062	Organismal Systems	Immune system	Chemokine signaling pathway	1.51056e-05	0.000485268	ENSSSCG00000026707	XCR1	0.220048	-2.18411	0.000486859	0.0211365	down	yes	0.038496	0.114752	0.138911	0.574444	0.374304	0.378958
ssc05146	Human Diseases	Infectious disease: parasitic	Amoebiasis	3.92755e-05	0.00112153	ENSSSCG00000036352	RAB7B	0.211099	-2.24401	2.62719e-13	2.23924e-10	down	yes	0.533683	0.660679	0.64241	2.36503	3.20816	3.12778
ssc05146	Human Diseases	Infectious disease: parasitic	Amoebiasis	3.92755e-05	0.00112153	ENSSSCG00000009002	TLR2	0.261758	-1.9337	1.45329e-12	9.84254e-10	down	yes	0.242131	0.198378	0.235175	0.963629	0.920697	0.697003
ssc05146	Human Diseases	Infectious disease: parasitic	Amoebiasis	3.92755e-05	0.00112153	ENSSSCG00000017755	NOS2	0.297181	-1.75059	1.84656e-07	3.90812e-05	down	yes	2.46124	2.02222	2.07884	9.86271	8.36997	3.84918
ssc05146	Human Diseases	Infectious disease: parasitic	Amoebiasis	3.92755e-05	0.00112153	ENSSSCG00000025644	ENSSSCG00000025644	0.223207	-2.16355	2.52487e-07	5.13213e-05	down	yes	0.794442	1.23491	0.618127	2.56196	3.90426	5.39491
ssc05146	Human Diseases	Infectious disease: parasitic	Amoebiasis	3.92755e-05	0.00112153	ENSSSCG00000025133	ITGB2	0.381078	-1.39184	2.91286e-07	5.70633e-05	down	yes	2.92941	1.79459	2.96807	5.92198	6.52439	7.73865
ssc05146	Human Diseases	Infectious disease: parasitic	Amoebiasis	3.92755e-05	0.00112153	ENSSSCG00000014369	CD14	0.373648	-1.42025	2.43896e-06	0.000354681	down	yes	2.57021	3.02635	4.03999	10.4672	9.46869	5.85457
ssc05146	Human Diseases	Infectious disease: parasitic	Amoebiasis	3.92755e-05	0.00112153	ENSSSCG00000016856	C9	0.46333	-1.10989	1.55398e-05	0.00152213	down	yes	14.5487	9.88828	8.37926	25.4552	24.1392	21.2326
ssc05146	Human Diseases	Infectious disease: parasitic	Amoebiasis	3.92755e-05	0.00112153	ENSSSCG00000015556	LAMC2	0.383146	-1.38403	2.49125e-05	0.00220345	down	yes	4.45587	5.68009	5.54977	17.6243	15.8388	7.47622
ssc05146	Human Diseases	Infectious disease: parasitic	Amoebiasis	3.92755e-05	0.00112153	ENSSSCG00000005503	TLR4	0.48183	-1.0534	4.41424e-05	0.00341945	down	yes	1.89913	1.43729	1.84978	4.41603	3.74549	2.60203
ssc05146	Human Diseases	Infectious disease: parasitic	Amoebiasis	3.92755e-05	0.00112153	ENSSSCG00000039214	ENSSSCG00000039214	0.0285872	-5.12849	6.6841e-05	0.00472955	down	yes	0.071811	0	0	1.28911	1.08481	0.138086
ssc05146	Human Diseases	Infectious disease: parasitic	Amoebiasis	3.92755e-05	0.00112153	ENSSSCG00000034767	LAMA1	10.9754	3.4562	0.000363827	0.0170438	up	yes	0.069928	0.115821	0.066322	0.010591	0.012376	0
ssc05418	Human Diseases	Cardiovascular disease	Fluid shear stress and atherosclerosis	4.8416e-05	0.00124429	ENSSSCG00000007032	PLAT	0.3529	-1.50267	7.32948e-13	5.10994e-10	down	yes	14.0966	15.9588	15.708	50.3654	45.4785	33.8341
ssc05418	Human Diseases	Cardiovascular disease	Fluid shear stress and atherosclerosis	4.8416e-05	0.00124429	ENSSSCG00000015559	NCF2	0.284689	-1.81254	3.01621e-08	7.37074e-06	down	yes	4.1099	5.70611	3.65919	20.5328	16.8971	9.90324
ssc05418	Human Diseases	Cardiovascular disease	Fluid shear stress and atherosclerosis	4.8416e-05	0.00124429	ENSSSCG00000031912	JUN	2.12853	1.08985	7.09926e-07	0.000121065	up	yes	146.559	238.531	232.136	108.009	103.724	78.2458
ssc05418	Human Diseases	Cardiovascular disease	Fluid shear stress and atherosclerosis	4.8416e-05	0.00124429	ENSSSCG00000031493	CYBA	0.484405	-1.04571	6.1941e-06	0.000744135	down	yes	18.5076	12.3092	16.8515	34.3191	35.7459	28.3407
ssc05418	Human Diseases	Cardiovascular disease	Fluid shear stress and atherosclerosis	4.8416e-05	0.00124429	ENSSSCG00000007722	NCF1	0.251899	-1.98908	3.84727e-05	0.00309138	down	yes	0.231731	0.167342	0.273456	1.11024	0.940043	0.619553
ssc05418	Human Diseases	Cardiovascular disease	Fluid shear stress and atherosclerosis	4.8416e-05	0.00124429	ENSSSCG00000016364	GPC1	2.39224	1.25836	5.79037e-05	0.0041974	up	yes	36.8011	59.6101	46.5017	12.8384	18.5829	28.3188
ssc05418	Human Diseases	Cardiovascular disease	Fluid shear stress and atherosclerosis	4.8416e-05	0.00124429	ENSSSCG00000039214	ENSSSCG00000039214	0.0285872	-5.12849	6.6841e-05	0.00472955	down	yes	0.071811	0	0	1.28911	1.08481	0.138086
ssc05418	Human Diseases	Cardiovascular disease	Fluid shear stress and atherosclerosis	4.8416e-05	0.00124429	ENSSSCG00000016450	NOS3	0.432766	-1.20834	0.000155416	0.00902937	down	yes	19.8828	15.445	15.7595	51.4707	45.3423	21.2353
ssc05418	Human Diseases	Cardiovascular disease	Fluid shear stress and atherosclerosis	4.8416e-05	0.00124429	ENSSSCG00000031736	MGST2	2.03303	1.02363	0.000243307	0.0125681	up	yes	15.4175	19.1406	16.8528	10.2348	10.5673	4.48566
ssc05418	Human Diseases	Cardiovascular disease	Fluid shear stress and atherosclerosis	4.8416e-05	0.00124429	ENSSSCG00000002383	FOS	2.65249	1.40735	0.000341806	0.0164344	up	yes	51.7257	134.672	160.001	61.4612	50.8367	18.2962
ssc05418	Human Diseases	Cardiovascular disease	Fluid shear stress and atherosclerosis	4.8416e-05	0.00124429	ENSSSCG00000008090	IL1A	0.0874798	-3.51491	0.000343591	0.0164868	down	yes	0	0.138294	0.158153	1.4831	1.47258	0.433082
ssc05418	Human Diseases	Cardiovascular disease	Fluid shear stress and atherosclerosis	4.8416e-05	0.00124429	ENSSSCG00000007436	MMP9	0.112103	-3.1571	0.000519315	0.0219036	down	yes	0.544271	0.755057	2.65784	5.2783	8.88265	21.1384
ssc05418	Human Diseases	Cardiovascular disease	Fluid shear stress and atherosclerosis	4.8416e-05	0.00124429	ENSSSCG00000063008	ITGA2B	0.325185	-1.62067	0.00150106	0.0486746	down	yes	1.49931	0.648918	1.18789	4.51148	4.56509	1.18256
ssc05152	Human Diseases	Infectious disease: bacterial	Tuberculosis	5.58816e-05	0.0013056	ENSSSCG00000006648	CTSS	0.370464	-1.4326	1.14189e-18	3.86676e-15	down	yes	18.1443	14.7939	17.6091	47.4559	45.3548	43.6326
ssc05152	Human Diseases	Infectious disease: bacterial	Tuberculosis	5.58816e-05	0.0013056	ENSSSCG00000013551	C3	0.273533	-1.87021	4.05676e-13	3.19253e-10	down	yes	1.3987	1.41272	1.78552	4.82431	5.37869	6.60276
ssc05152	Human Diseases	Infectious disease: bacterial	Tuberculosis	5.58816e-05	0.0013056	ENSSSCG00000009002	TLR2	0.261758	-1.9337	1.45329e-12	9.84254e-10	down	yes	0.242131	0.198378	0.235175	0.963629	0.920697	0.697003
ssc05152	Human Diseases	Infectious disease: bacterial	Tuberculosis	5.58816e-05	0.0013056	ENSSSCG00000011038	MRC1	0.150544	-2.73174	4.05411e-10	1.68594e-07	down	yes	1.0347	0.259729	1.05702	6.50195	5.39286	3.72484
ssc05152	Human Diseases	Infectious disease: bacterial	Tuberculosis	5.58816e-05	0.0013056	ENSSSCG00000017755	NOS2	0.297181	-1.75059	1.84656e-07	3.90812e-05	down	yes	2.46124	2.02222	2.07884	9.86271	8.36997	3.84918
ssc05152	Human Diseases	Infectious disease: bacterial	Tuberculosis	5.58816e-05	0.0013056	ENSSSCG00000025133	ITGB2	0.381078	-1.39184	2.91286e-07	5.70633e-05	down	yes	2.92941	1.79459	2.96807	5.92198	6.52439	7.73865
ssc05152	Human Diseases	Infectious disease: bacterial	Tuberculosis	5.58816e-05	0.0013056	ENSSSCG00000000884	APAF1	0.352906	-1.50264	6.00109e-07	0.00010537	down	yes	5.15605	6.92886	7.05755	23.5103	19.6224	11.1096
ssc05152	Human Diseases	Infectious disease: bacterial	Tuberculosis	5.58816e-05	0.0013056	ENSSSCG00000014369	CD14	0.373648	-1.42025	2.43896e-06	0.000354681	down	yes	2.57021	3.02635	4.03999	10.4672	9.46869	5.85457
ssc05152	Human Diseases	Infectious disease: bacterial	Tuberculosis	5.58816e-05	0.0013056	ENSSSCG00000015085	IL10RA	0.364607	-1.45559	8.77386e-06	0.000976412	down	yes	5.06632	2.05011	3.03242	10.5086	9.92731	7.39915
ssc05152	Human Diseases	Infectious disease: bacterial	Tuberculosis	5.58816e-05	0.0013056	ENSSSCG00000005503	TLR4	0.48183	-1.0534	4.41424e-05	0.00341945	down	yes	1.89913	1.43729	1.84978	4.41603	3.74549	2.60203
ssc05152	Human Diseases	Infectious disease: bacterial	Tuberculosis	5.58816e-05	0.0013056	ENSSSCG00000039214	ENSSSCG00000039214	0.0285872	-5.12849	6.6841e-05	0.00472955	down	yes	0.071811	0	0	1.28911	1.08481	0.138086
ssc05152	Human Diseases	Infectious disease: bacterial	Tuberculosis	5.58816e-05	0.0013056	ENSSSCG00000006350	ENSSSCG00000006350	0.252899	-1.98337	6.82436e-05	0.00477181	down	yes	5.61981	0.947202	3.26057	16.1536	13.7744	8.93164
ssc05152	Human Diseases	Infectious disease: bacterial	Tuberculosis	5.58816e-05	0.0013056	ENSSSCG00000039535	CAMK2B	0.0501412	-4.31786	0.00011841	0.0073067	down	yes	0.0813007	0	0.049531	1.51878	1.04571	0.0447753
ssc05152	Human Diseases	Infectious disease: bacterial	Tuberculosis	5.58816e-05	0.0013056	ENSSSCG00000008090	IL1A	0.0874798	-3.51491	0.000343591	0.0164868	down	yes	0	0.138294	0.158153	1.4831	1.47258	0.433082
ssc05152	Human Diseases	Infectious disease: bacterial	Tuberculosis	5.58816e-05	0.0013056	ENSSSCG00000006357	FCER1G	0.444342	-1.17026	0.00142656	0.046706	down	yes	26.3364	10.6467	21.8834	58.2995	44.452	29.7286
ssc04964	Organismal Systems	Excretory system	Proximal tubule bicarbonate reclamation	0.000228735	0.00470228	ENSSSCG00000006391	ATP1A2	0.41596	-1.26548	1.27357e-05	0.00129875	down	yes	0.720325	0.890562	0.655964	2.03469	1.67091	1.74409
ssc04964	Organismal Systems	Excretory system	Proximal tubule bicarbonate reclamation	0.000228735	0.00470228	ENSSSCG00000017951	ATP1B2	0.45804	-1.12646	5.14125e-05	0.00384442	down	yes	2.02642	1.5372	1.39938	3.37284	3.7959	3.66657
ssc04964	Organismal Systems	Excretory system	Proximal tubule bicarbonate reclamation	0.000228735	0.00470228	ENSSSCG00000023186	CA4	0.331803	-1.5916	0.000135906	0.00817641	down	yes	10.7935	10.3256	6.77742	38.2227	34.1264	11.7262
ssc04964	Organismal Systems	Excretory system	Proximal tubule bicarbonate reclamation	0.000228735	0.00470228	ENSSSCG00000033620	SLC25A10	2.11007	1.07729	0.000191951	0.0105814	up	yes	166.249	257.395	188.777	68.5562	87.4416	134.241
ssc04964	Organismal Systems	Excretory system	Proximal tubule bicarbonate reclamation	0.000228735	0.00470228	ENSSSCG00000006140	CA2	0.397894	-1.32955	0.00130042	0.0432329	down	yes	1.53221	0.538667	1.02071	2.33162	2.49577	2.94248
ssc05150	Human Diseases	Infectious disease: bacterial	Staphylococcus aureus infection	0.000249581	0.00470228	ENSSSCG00000013551	C3	0.273533	-1.87021	4.05676e-13	3.19253e-10	down	yes	1.3987	1.41272	1.78552	4.82431	5.37869	6.60276
ssc05150	Human Diseases	Infectious disease: bacterial	Staphylococcus aureus infection	0.000249581	0.00470228	ENSSSCG00000056729	C5AR1	0.236098	-2.08254	2.28788e-12	1.46573e-09	down	yes	2.21547	1.21498	1.25217	6.60772	6.98553	6.24011
ssc05150	Human Diseases	Infectious disease: bacterial	Staphylococcus aureus infection	0.000249581	0.00470228	ENSSSCG00000025133	ITGB2	0.381078	-1.39184	2.91286e-07	5.70633e-05	down	yes	2.92941	1.79459	2.96807	5.92198	6.52439	7.73865
ssc05150	Human Diseases	Infectious disease: bacterial	Staphylococcus aureus infection	0.000249581	0.00470228	ENSSSCG00000033512	C1QB	0.26517	-1.91501	4.73731e-06	0.00061029	down	yes	10.4582	3.23701	10.7569	39.6548	34.5555	18.0026
ssc05150	Human Diseases	Infectious disease: bacterial	Staphylococcus aureus infection	0.000249581	0.00470228	ENSSSCG00000038706	C1QC	0.258447	-1.95206	7.68691e-06	0.000876807	down	yes	22.6937	5.30699	16.674	71.3082	65.8292	35.7209
ssc05150	Human Diseases	Infectious disease: bacterial	Staphylococcus aureus infection	0.000249581	0.00470228	ENSSSCG00000003524	C1QA	0.251856	-1.98933	3.82937e-05	0.00308746	down	yes	12.7526	3.09395	14.2621	53.4073	45.0747	21.0653
ssc05150	Human Diseases	Infectious disease: bacterial	Staphylococcus aureus infection	0.000249581	0.00470228	ENSSSCG00000031788	PTAFR	0.337606	-1.56659	5.3237e-05	0.00394353	down	yes	0.936501	0.692327	0.661848	3.30841	2.16544	1.31122
ssc05150	Human Diseases	Infectious disease: bacterial	Staphylococcus aureus infection	0.000249581	0.00470228	ENSSSCG00000006350	ENSSSCG00000006350	0.252899	-1.98337	6.82436e-05	0.00477181	down	yes	5.61981	0.947202	3.26057	16.1536	13.7744	8.93164
ssc05150	Human Diseases	Infectious disease: bacterial	Staphylococcus aureus infection	0.000249581	0.00470228	ENSSSCG00000001427	C4A	0.426905	-1.22801	0.00154184	0.0492557	down	yes	10.1454	6.08694	11.4747	30.1364	24.6872	10.0787
ssc04620	Organismal Systems	Immune system	Toll-like receptor signaling pathway	0.000256156	0.00470228	ENSSSCG00000009216	SPP1	0.137138	-2.8663	6.63822e-16	1.2104e-12	down	yes	9.85735	26.3966	17.2624	122.618	126.493	141.128
ssc04620	Organismal Systems	Immune system	Toll-like receptor signaling pathway	0.000256156	0.00470228	ENSSSCG00000009002	TLR2	0.261758	-1.9337	1.45329e-12	9.84254e-10	down	yes	0.242131	0.198378	0.235175	0.963629	0.920697	0.697003
ssc04620	Organismal Systems	Immune system	Toll-like receptor signaling pathway	0.000256156	0.00470228	ENSSSCG00000031912	JUN	2.12853	1.08985	7.09926e-07	0.000121065	up	yes	146.559	238.531	232.136	108.009	103.724	78.2458
ssc04620	Organismal Systems	Immune system	Toll-like receptor signaling pathway	0.000256156	0.00470228	ENSSSCG00000014369	CD14	0.373648	-1.42025	2.43896e-06	0.000354681	down	yes	2.57021	3.02635	4.03999	10.4672	9.46869	5.85457
ssc04620	Organismal Systems	Immune system	Toll-like receptor signaling pathway	0.000256156	0.00470228	ENSSSCG00000005503	TLR4	0.48183	-1.0534	4.41424e-05	0.00341945	down	yes	1.89913	1.43729	1.84978	4.41603	3.74549	2.60203
ssc04620	Organismal Systems	Immune system	Toll-like receptor signaling pathway	0.000256156	0.00470228	ENSSSCG00000020705	MAP3K8	0.40704	-1.29676	5.52747e-05	0.00404874	down	yes	0.471917	0.291219	0.326944	0.984593	1.02612	0.667345
ssc04620	Organismal Systems	Immune system	Toll-like receptor signaling pathway	0.000256156	0.00470228	ENSSSCG00000039214	ENSSSCG00000039214	0.0285872	-5.12849	6.6841e-05	0.00472955	down	yes	0.071811	0	0	1.28911	1.08481	0.138086
ssc04620	Organismal Systems	Immune system	Toll-like receptor signaling pathway	0.000256156	0.00470228	ENSSSCG00000032777	CXCL9	0.40678	-1.29768	0.000110128	0.00688777	down	yes	2.68846	3.81436	5.40964	12.2936	9.62856	7.36256
ssc04620	Organismal Systems	Immune system	Toll-like receptor signaling pathway	0.000256156	0.00470228	ENSSSCG00000032343	CCL4	0.25394	-1.97744	0.000233644	0.0122413	down	yes	0.728731	1.46798	1.59811	7.38512	5.40678	2.15188
ssc04620	Organismal Systems	Immune system	Toll-like receptor signaling pathway	0.000256156	0.00470228	ENSSSCG00000002383	FOS	2.65249	1.40735	0.000341806	0.0164344	up	yes	51.7257	134.672	160.001	61.4612	50.8367	18.2962
ssc05142	Human Diseases	Infectious disease: parasitic	Chagas disease	0.00035528	0.00608713	ENSSSCG00000013551	C3	0.273533	-1.87021	4.05676e-13	3.19253e-10	down	yes	1.3987	1.41272	1.78552	4.82431	5.37869	6.60276
ssc05142	Human Diseases	Infectious disease: parasitic	Chagas disease	0.00035528	0.00608713	ENSSSCG00000009002	TLR2	0.261758	-1.9337	1.45329e-12	9.84254e-10	down	yes	0.242131	0.198378	0.235175	0.963629	0.920697	0.697003
ssc05142	Human Diseases	Infectious disease: parasitic	Chagas disease	0.00035528	0.00608713	ENSSSCG00000017755	NOS2	0.297181	-1.75059	1.84656e-07	3.90812e-05	down	yes	2.46124	2.02222	2.07884	9.86271	8.36997	3.84918
ssc05142	Human Diseases	Infectious disease: parasitic	Chagas disease	0.00035528	0.00608713	ENSSSCG00000031912	JUN	2.12853	1.08985	7.09926e-07	0.000121065	up	yes	146.559	238.531	232.136	108.009	103.724	78.2458
ssc05142	Human Diseases	Infectious disease: parasitic	Chagas disease	0.00035528	0.00608713	ENSSSCG00000033512	C1QB	0.26517	-1.91501	4.73731e-06	0.00061029	down	yes	10.4582	3.23701	10.7569	39.6548	34.5555	18.0026
ssc05142	Human Diseases	Infectious disease: parasitic	Chagas disease	0.00035528	0.00608713	ENSSSCG00000038706	C1QC	0.258447	-1.95206	7.68691e-06	0.000876807	down	yes	22.6937	5.30699	16.674	71.3082	65.8292	35.7209
ssc05142	Human Diseases	Infectious disease: parasitic	Chagas disease	0.00035528	0.00608713	ENSSSCG00000003524	C1QA	0.251856	-1.98933	3.82937e-05	0.00308746	down	yes	12.7526	3.09395	14.2621	53.4073	45.0747	21.0653
ssc05142	Human Diseases	Infectious disease: parasitic	Chagas disease	0.00035528	0.00608713	ENSSSCG00000005503	TLR4	0.48183	-1.0534	4.41424e-05	0.00341945	down	yes	1.89913	1.43729	1.84978	4.41603	3.74549	2.60203
ssc05142	Human Diseases	Infectious disease: parasitic	Chagas disease	0.00035528	0.00608713	ENSSSCG00000039214	ENSSSCG00000039214	0.0285872	-5.12849	6.6841e-05	0.00472955	down	yes	0.071811	0	0	1.28911	1.08481	0.138086
ssc05142	Human Diseases	Infectious disease: parasitic	Chagas disease	0.00035528	0.00608713	ENSSSCG00000002383	FOS	2.65249	1.40735	0.000341806	0.0164344	up	yes	51.7257	134.672	160.001	61.4612	50.8367	18.2962
ssc04662	Organismal Systems	Immune system	B cell receptor signaling pathway	0.000599954	0.00915024	ENSSSCG00000013553	VAV1	0.288444	-1.79363	3.42588e-08	8.28644e-06	down	yes	1.22791	0.625221	1.31869	4.30399	3.77463	2.91766
ssc04662	Organismal Systems	Immune system	B cell receptor signaling pathway	0.000599954	0.00915024	ENSSSCG00000059775	ENSSSCG00000059775	0.198438	-2.33324	4.80752e-07	8.63314e-05	down	yes	0.499927	0.840199	2.0002	6.68056	5.80912	4.34345
ssc04662	Organismal Systems	Immune system	B cell receptor signaling pathway	0.000599954	0.00915024	ENSSSCG00000031912	JUN	2.12853	1.08985	7.09926e-07	0.000121065	up	yes	146.559	238.531	232.136	108.009	103.724	78.2458
ssc04662	Organismal Systems	Immune system	B cell receptor signaling pathway	0.000599954	0.00915024	ENSSSCG00000010509	PIK3AP1	0.398756	-1.32642	2.83488e-06	0.000404808	down	yes	1.20375	0.696687	0.988776	2.30318	2.72542	2.21698
ssc04662	Organismal Systems	Immune system	B cell receptor signaling pathway	0.000599954	0.00915024	ENSSSCG00000010504	BLNK	0.330236	-1.59843	1.05918e-05	0.00113509	down	yes	0.491579	0.242817	0.407969	1.48911	1.03319	0.936934
ssc04662	Organismal Systems	Immune system	B cell receptor signaling pathway	0.000599954	0.00915024	ENSSSCG00000006350	ENSSSCG00000006350	0.252899	-1.98337	6.82436e-05	0.00477181	down	yes	5.61981	0.947202	3.26057	16.1536	13.7744	8.93164
ssc04662	Organismal Systems	Immune system	B cell receptor signaling pathway	0.000599954	0.00915024	ENSSSCG00000002383	FOS	2.65249	1.40735	0.000341806	0.0164344	up	yes	51.7257	134.672	160.001	61.4612	50.8367	18.2962
ssc04662	Organismal Systems	Immune system	B cell receptor signaling pathway	0.000599954	0.00915024	ENSSSCG00000037426	ENSSSCG00000037426	0.15617	-2.67881	0.00132464	0.0439765	down	yes	0.136312	0.044217	0.046139	0.429557	0.602009	0.419856
ssc04670	Organismal Systems	Immune system	Leukocyte transendothelial migration	0.000605269	0.00915024	ENSSSCG00000036246	GP91-PHOX	0.200829	-2.31596	4.81254e-17	1.14077e-13	down	yes	1.41299	0.869504	1.42653	7.58359	6.22046	4.66449
ssc04670	Organismal Systems	Immune system	Leukocyte transendothelial migration	0.000605269	0.00915024	ENSSSCG00000015559	NCF2	0.284689	-1.81254	3.01621e-08	7.37074e-06	down	yes	4.1099	5.70611	3.65919	20.5328	16.8971	9.90324
ssc04670	Organismal Systems	Immune system	Leukocyte transendothelial migration	0.000605269	0.00915024	ENSSSCG00000013553	VAV1	0.288444	-1.79363	3.42588e-08	8.28644e-06	down	yes	1.22791	0.625221	1.31869	4.30399	3.77463	2.91766
ssc04670	Organismal Systems	Immune system	Leukocyte transendothelial migration	0.000605269	0.00915024	ENSSSCG00000025133	ITGB2	0.381078	-1.39184	2.91286e-07	5.70633e-05	down	yes	2.92941	1.79459	2.96807	5.92198	6.52439	7.73865
ssc04670	Organismal Systems	Immune system	Leukocyte transendothelial migration	0.000605269	0.00915024	ENSSSCG00000000137	NCF4	0.258713	-1.95058	2.37138e-06	0.000346983	down	yes	0.775695	0.438192	0.616963	3.47558	2.49187	1.10932
ssc04670	Organismal Systems	Immune system	Leukocyte transendothelial migration	0.000605269	0.00915024	ENSSSCG00000031493	CYBA	0.484405	-1.04571	6.1941e-06	0.000744135	down	yes	18.5076	12.3092	16.8515	34.3191	35.7459	28.3407
ssc04670	Organismal Systems	Immune system	Leukocyte transendothelial migration	0.000605269	0.00915024	ENSSSCG00000017934	CLDN7	3.10308	1.6337	2.03408e-05	0.00189082	up	yes	4.48926	6.32532	2.83327	1.18991	1.46911	1.73915
ssc04670	Organismal Systems	Immune system	Leukocyte transendothelial migration	0.000605269	0.00915024	ENSSSCG00000007722	NCF1	0.251899	-1.98908	3.84727e-05	0.00309138	down	yes	0.231731	0.167342	0.273456	1.11024	0.940043	0.619553
ssc04670	Organismal Systems	Immune system	Leukocyte transendothelial migration	0.000605269	0.00915024	ENSSSCG00000039416	CXCR4	0.353752	-1.49919	8.43721e-05	0.00557091	down	yes	2.88652	1.8953	2.56487	9.5084	7.60031	3.65923
ssc04670	Organismal Systems	Immune system	Leukocyte transendothelial migration	0.000605269	0.00915024	ENSSSCG00000007436	MMP9	0.112103	-3.1571	0.000519315	0.0219036	down	yes	0.544271	0.755057	2.65784	5.2783	8.88265	21.1384
ssc05134	Human Diseases	Infectious disease: bacterial	Legionellosis	0.000719592	0.0102742	ENSSSCG00000013551	C3	0.273533	-1.87021	4.05676e-13	3.19253e-10	down	yes	1.3987	1.41272	1.78552	4.82431	5.37869	6.60276
ssc05134	Human Diseases	Infectious disease: bacterial	Legionellosis	0.000719592	0.0102742	ENSSSCG00000009002	TLR2	0.261758	-1.9337	1.45329e-12	9.84254e-10	down	yes	0.242131	0.198378	0.235175	0.963629	0.920697	0.697003
ssc05134	Human Diseases	Infectious disease: bacterial	Legionellosis	0.000719592	0.0102742	ENSSSCG00000025133	ITGB2	0.381078	-1.39184	2.91286e-07	5.70633e-05	down	yes	2.92941	1.79459	2.96807	5.92198	6.52439	7.73865
ssc05134	Human Diseases	Infectious disease: bacterial	Legionellosis	0.000719592	0.0102742	ENSSSCG00000000884	APAF1	0.352906	-1.50264	6.00109e-07	0.00010537	down	yes	5.15605	6.92886	7.05755	23.5103	19.6224	11.1096
ssc05134	Human Diseases	Infectious disease: bacterial	Legionellosis	0.000719592	0.0102742	ENSSSCG00000014369	CD14	0.373648	-1.42025	2.43896e-06	0.000354681	down	yes	2.57021	3.02635	4.03999	10.4672	9.46869	5.85457
ssc05134	Human Diseases	Infectious disease: bacterial	Legionellosis	0.000719592	0.0102742	ENSSSCG00000005503	TLR4	0.48183	-1.0534	4.41424e-05	0.00341945	down	yes	1.89913	1.43729	1.84978	4.41603	3.74549	2.60203
ssc05134	Human Diseases	Infectious disease: bacterial	Legionellosis	0.000719592	0.0102742	ENSSSCG00000039214	ENSSSCG00000039214	0.0285872	-5.12849	6.6841e-05	0.00472955	down	yes	0.071811	0	0	1.28911	1.08481	0.138086
ssc05162	Human Diseases	Infectious disease: viral	Measles	0.000837633	0.0113301	ENSSSCG00000009002	TLR2	0.261758	-1.9337	1.45329e-12	9.84254e-10	down	yes	0.242131	0.198378	0.235175	0.963629	0.920697	0.697003
ssc05162	Human Diseases	Infectious disease: viral	Measles	0.000837633	0.0113301	ENSSSCG00000012397	IL2RG	0.298773	-1.74288	1.05221e-11	5.80037e-09	down	yes	4.1612	2.96118	4.3484	15.2717	12.9891	10.1322
ssc05162	Human Diseases	Infectious disease: viral	Measles	0.000837633	0.0113301	ENSSSCG00000000884	APAF1	0.352906	-1.50264	6.00109e-07	0.00010537	down	yes	5.15605	6.92886	7.05755	23.5103	19.6224	11.1096
ssc05162	Human Diseases	Infectious disease: viral	Measles	0.000837633	0.0113301	ENSSSCG00000031912	JUN	2.12853	1.08985	7.09926e-07	0.000121065	up	yes	146.559	238.531	232.136	108.009	103.724	78.2458
ssc05162	Human Diseases	Infectious disease: viral	Measles	0.000837633	0.0113301	ENSSSCG00000038694	CCND2	2.82238	1.49691	3.51989e-06	0.000482286	up	yes	2.2395	2.26468	1.56766	0.690152	0.583219	0.877948
ssc05162	Human Diseases	Infectious disease: viral	Measles	0.000837633	0.0113301	ENSSSCG00000005503	TLR4	0.48183	-1.0534	4.41424e-05	0.00341945	down	yes	1.89913	1.43729	1.84978	4.41603	3.74549	2.60203
ssc05162	Human Diseases	Infectious disease: viral	Measles	0.000837633	0.0113301	ENSSSCG00000039214	ENSSSCG00000039214	0.0285872	-5.12849	6.6841e-05	0.00472955	down	yes	0.071811	0	0	1.28911	1.08481	0.138086
ssc05162	Human Diseases	Infectious disease: viral	Measles	0.000837633	0.0113301	ENSSSCG00000006350	ENSSSCG00000006350	0.252899	-1.98337	6.82436e-05	0.00477181	down	yes	5.61981	0.947202	3.26057	16.1536	13.7744	8.93164
ssc05162	Human Diseases	Infectious disease: viral	Measles	0.000837633	0.0113301	ENSSSCG00000002383	FOS	2.65249	1.40735	0.000341806	0.0164344	up	yes	51.7257	134.672	160.001	61.4612	50.8367	18.2962
ssc05162	Human Diseases	Infectious disease: viral	Measles	0.000837633	0.0113301	ENSSSCG00000008090	IL1A	0.0874798	-3.51491	0.000343591	0.0164868	down	yes	0	0.138294	0.158153	1.4831	1.47258	0.433082
ssc05162	Human Diseases	Infectious disease: viral	Measles	0.000837633	0.0113301	ENSSSCG00000006095	CCNE2	0.430658	-1.21539	0.000745772	0.0287444	down	yes	1.26223	1.7483	2.01328	4.72691	4.49502	2.4435
ssc04650	Organismal Systems	Immune system	Natural killer cell mediated cytotoxicity	0.00120668	0.0155058	ENSSSCG00000006379	CD48	0.250506	-1.99708	7.22328e-15	9.51226e-12	down	yes	1.50511	1.48298	2.07143	6.46549	7.11649	6.61522
ssc04650	Organismal Systems	Immune system	Natural killer cell mediated cytotoxicity	0.00120668	0.0155058	ENSSSCG00000009633	ENSSSCG00000009633	0.340632	-1.55371	4.99525e-10	2.00691e-07	down	yes	10.7651	11.8382	10.0347	39.7181	34.0498	22.0479
ssc04650	Organismal Systems	Immune system	Natural killer cell mediated cytotoxicity	0.00120668	0.0155058	ENSSSCG00000013553	VAV1	0.288444	-1.79363	3.42588e-08	8.28644e-06	down	yes	1.22791	0.625221	1.31869	4.30399	3.77463	2.91766
ssc04650	Organismal Systems	Immune system	Natural killer cell mediated cytotoxicity	0.00120668	0.0155058	ENSSSCG00000025133	ITGB2	0.381078	-1.39184	2.91286e-07	5.70633e-05	down	yes	2.92941	1.79459	2.96807	5.92198	6.52439	7.73865
ssc04650	Organismal Systems	Immune system	Natural killer cell mediated cytotoxicity	0.00120668	0.0155058	ENSSSCG00000002919	TYROBP	0.377612	-1.40502	1.36692e-05	0.00137295	down	yes	15.3479	6.77388	10.8878	31.6351	31.5736	24.2078
ssc04650	Organismal Systems	Immune system	Natural killer cell mediated cytotoxicity	0.00120668	0.0155058	ENSSSCG00000058071	ENSSSCG00000058071	0.305699	-1.70982	3.3132e-05	0.00274602	down	yes	3.6129	2.25998	5.42536	16.9983	14.0993	5.86118
ssc04650	Organismal Systems	Immune system	Natural killer cell mediated cytotoxicity	0.00120668	0.0155058	ENSSSCG00000017006	LCP2	0.344998	-1.53534	0.000108824	0.00682426	down	yes	1.09894	0.846338	1.38263	4.3203	3.84813	1.47774
ssc04650	Organismal Systems	Immune system	Natural killer cell mediated cytotoxicity	0.00120668	0.0155058	ENSSSCG00000039841	SHC3	0.0303958	-5.03999	0.000150148	0.00883263	down	yes	0	0	0.0177165	0.192635	0.123226	0.267002
ssc04650	Organismal Systems	Immune system	Natural killer cell mediated cytotoxicity	0.00120668	0.0155058	ENSSSCG00000006357	FCER1G	0.444342	-1.17026	0.00142656	0.046706	down	yes	26.3364	10.6467	21.8834	58.2995	44.452	29.7286
ssc04640	Organismal Systems	Immune system	Hematopoietic cell lineage	0.00166563	0.0194576	ENSSSCG00000025795	CSF3R	0.0895656	-3.48091	1.83938e-18	5.45008e-15	down	yes	0.208293	0.260524	0.293348	2.10886	2.55495	3.84578
ssc04640	Organismal Systems	Immune system	Hematopoietic cell lineage	0.00166563	0.0194576	ENSSSCG00000015405	ENSSSCG00000015405	0.285037	-1.81078	4.64856e-09	1.46919e-06	down	yes	2.24569	1.27234	1.56819	6.5817	6.48757	4.7748
ssc04640	Organismal Systems	Immune system	Hematopoietic cell lineage	0.00166563	0.0194576	ENSSSCG00000014441	CSF1R	0.267402	-1.90292	5.30672e-09	1.61802e-06	down	yes	12.3228	4.42678	8.77211	36.1176	33.7569	25.5687
ssc04640	Organismal Systems	Immune system	Hematopoietic cell lineage	0.00166563	0.0194576	ENSSSCG00000025644	ENSSSCG00000025644	0.223207	-2.16355	2.52487e-07	5.13213e-05	down	yes	0.794442	1.23491	0.618127	2.56196	3.90426	5.39491
ssc04640	Organismal Systems	Immune system	Hematopoietic cell lineage	0.00166563	0.0194576	ENSSSCG00000014369	CD14	0.373648	-1.42025	2.43896e-06	0.000354681	down	yes	2.57021	3.02635	4.03999	10.4672	9.46869	5.85457
ssc04640	Organismal Systems	Immune system	Hematopoietic cell lineage	0.00166563	0.0194576	ENSSSCG00000039214	ENSSSCG00000039214	0.0285872	-5.12849	6.6841e-05	0.00472955	down	yes	0.071811	0	0	1.28911	1.08481	0.138086
ssc04640	Organismal Systems	Immune system	Hematopoietic cell lineage	0.00166563	0.0194576	ENSSSCG00000008090	IL1A	0.0874798	-3.51491	0.000343591	0.0164868	down	yes	0	0.138294	0.158153	1.4831	1.47258	0.433082
ssc04640	Organismal Systems	Immune system	Hematopoietic cell lineage	0.00166563	0.0194576	ENSSSCG00000063008	ITGA2B	0.325185	-1.62067	0.00150106	0.0486746	down	yes	1.49931	0.648918	1.18789	4.51148	4.56509	1.18256
ssc05323	Human Diseases	Immune disease	Rheumatoid arthritis	0.00166563	0.0194576	ENSSSCG00000009002	TLR2	0.261758	-1.9337	1.45329e-12	9.84254e-10	down	yes	0.242131	0.198378	0.235175	0.963629	0.920697	0.697003
ssc05323	Human Diseases	Immune disease	Rheumatoid arthritis	0.00166563	0.0194576	ENSSSCG00000025133	ITGB2	0.381078	-1.39184	2.91286e-07	5.70633e-05	down	yes	2.92941	1.79459	2.96807	5.92198	6.52439	7.73865
ssc05323	Human Diseases	Immune disease	Rheumatoid arthritis	0.00166563	0.0194576	ENSSSCG00000031912	JUN	2.12853	1.08985	7.09926e-07	0.000121065	up	yes	146.559	238.531	232.136	108.009	103.724	78.2458
ssc05323	Human Diseases	Immune disease	Rheumatoid arthritis	0.00166563	0.0194576	ENSSSCG00000005503	TLR4	0.48183	-1.0534	4.41424e-05	0.00341945	down	yes	1.89913	1.43729	1.84978	4.41603	3.74549	2.60203
ssc05323	Human Diseases	Immune disease	Rheumatoid arthritis	0.00166563	0.0194576	ENSSSCG00000039214	ENSSSCG00000039214	0.0285872	-5.12849	6.6841e-05	0.00472955	down	yes	0.071811	0	0	1.28911	1.08481	0.138086
ssc05323	Human Diseases	Immune disease	Rheumatoid arthritis	0.00166563	0.0194576	ENSSSCG00000002383	FOS	2.65249	1.40735	0.000341806	0.0164344	up	yes	51.7257	134.672	160.001	61.4612	50.8367	18.2962
ssc05323	Human Diseases	Immune disease	Rheumatoid arthritis	0.00166563	0.0194576	ENSSSCG00000008090	IL1A	0.0874798	-3.51491	0.000343591	0.0164868	down	yes	0	0.138294	0.158153	1.4831	1.47258	0.433082
ssc05323	Human Diseases	Immune disease	Rheumatoid arthritis	0.00166563	0.0194576	ENSSSCG00000016122	CTLA4	0.000568433	-10.7807	0.000522909	0.0219663	down	yes	0	0	0	0.313975	0.140938	0.072854
ssc05171	Human Diseases	Infectious disease: viral	Coronavirus disease - COVID-19	0.00305596	0.034147	ENSSSCG00000036246	GP91-PHOX	0.200829	-2.31596	4.81254e-17	1.14077e-13	down	yes	1.41299	0.869504	1.42653	7.58359	6.22046	4.66449
ssc05171	Human Diseases	Infectious disease: viral	Coronavirus disease - COVID-19	0.00305596	0.034147	ENSSSCG00000013551	C3	0.273533	-1.87021	4.05676e-13	3.19253e-10	down	yes	1.3987	1.41272	1.78552	4.82431	5.37869	6.60276
ssc05171	Human Diseases	Infectious disease: viral	Coronavirus disease - COVID-19	0.00305596	0.034147	ENSSSCG00000009002	TLR2	0.261758	-1.9337	1.45329e-12	9.84254e-10	down	yes	0.242131	0.198378	0.235175	0.963629	0.920697	0.697003
ssc05171	Human Diseases	Infectious disease: viral	Coronavirus disease - COVID-19	0.00305596	0.034147	ENSSSCG00000056729	C5AR1	0.236098	-2.08254	2.28788e-12	1.46573e-09	down	yes	2.21547	1.21498	1.25217	6.60772	6.98553	6.24011
ssc05171	Human Diseases	Infectious disease: viral	Coronavirus disease - COVID-19	0.00305596	0.034147	ENSSSCG00000031912	JUN	2.12853	1.08985	7.09926e-07	0.000121065	up	yes	146.559	238.531	232.136	108.009	103.724	78.2458
ssc05171	Human Diseases	Infectious disease: viral	Coronavirus disease - COVID-19	0.00305596	0.034147	ENSSSCG00000033512	C1QB	0.26517	-1.91501	4.73731e-06	0.00061029	down	yes	10.4582	3.23701	10.7569	39.6548	34.5555	18.0026
ssc05171	Human Diseases	Infectious disease: viral	Coronavirus disease - COVID-19	0.00305596	0.034147	ENSSSCG00000038706	C1QC	0.258447	-1.95206	7.68691e-06	0.000876807	down	yes	22.6937	5.30699	16.674	71.3082	65.8292	35.7209
ssc05171	Human Diseases	Infectious disease: viral	Coronavirus disease - COVID-19	0.00305596	0.034147	ENSSSCG00000016856	C9	0.46333	-1.10989	1.55398e-05	0.00152213	down	yes	14.5487	9.88828	8.37926	25.4552	24.1392	21.2326
ssc05171	Human Diseases	Infectious disease: viral	Coronavirus disease - COVID-19	0.00305596	0.034147	ENSSSCG00000003524	C1QA	0.251856	-1.98933	3.82937e-05	0.00308746	down	yes	12.7526	3.09395	14.2621	53.4073	45.0747	21.0653
ssc05171	Human Diseases	Infectious disease: viral	Coronavirus disease - COVID-19	0.00305596	0.034147	ENSSSCG00000005503	TLR4	0.48183	-1.0534	4.41424e-05	0.00341945	down	yes	1.89913	1.43729	1.84978	4.41603	3.74549	2.60203
ssc05171	Human Diseases	Infectious disease: viral	Coronavirus disease - COVID-19	0.00305596	0.034147	ENSSSCG00000039214	ENSSSCG00000039214	0.0285872	-5.12849	6.6841e-05	0.00472955	down	yes	0.071811	0	0	1.28911	1.08481	0.138086
ssc05171	Human Diseases	Infectious disease: viral	Coronavirus disease - COVID-19	0.00305596	0.034147	ENSSSCG00000024310	F13A1	0.262015	-1.93228	0.000163606	0.00937318	down	yes	2.29022	0.342431	1.85476	6.6358	5.91148	4.57922
ssc05171	Human Diseases	Infectious disease: viral	Coronavirus disease - COVID-19	0.00305596	0.034147	ENSSSCG00000002383	FOS	2.65249	1.40735	0.000341806	0.0164344	up	yes	51.7257	134.672	160.001	61.4612	50.8367	18.2962
ssc05171	Human Diseases	Infectious disease: viral	Coronavirus disease - COVID-19	0.00305596	0.034147	ENSSSCG00000001427	C4A	0.426905	-1.22801	0.00154184	0.0492557	down	yes	10.1454	6.08694	11.4747	30.1364	24.6872	10.0787
ssc05200	Human Diseases	Cancer: overview	Pathways in cancer	0.00430252	0.0451428	ENSSSCG00000035524	WNT9B	0.0878802	-3.50832	1.07095e-20	5.07714e-17	down	yes	0.08171	0.088024	0.11439	1.22233	0.961308	1.04944
ssc05200	Human Diseases	Cancer: overview	Pathways in cancer	0.00430252	0.0451428	ENSSSCG00000025795	CSF3R	0.0895656	-3.48091	1.83938e-18	5.45008e-15	down	yes	0.208293	0.260524	0.293348	2.10886	2.55495	3.84578
ssc05200	Human Diseases	Cancer: overview	Pathways in cancer	0.00430252	0.0451428	ENSSSCG00000035249	GADD45G	2.50964	1.32748	1.97273e-12	1.29893e-09	up	yes	138.309	123.41	124.43	59.6796	57.9817	36.2047
ssc05200	Human Diseases	Cancer: overview	Pathways in cancer	0.00430252	0.0451428	ENSSSCG00000012397	IL2RG	0.298773	-1.74288	1.05221e-11	5.80037e-09	down	yes	4.1612	2.96118	4.3484	15.2717	12.9891	10.1322
ssc05200	Human Diseases	Cancer: overview	Pathways in cancer	0.00430252	0.0451428	ENSSSCG00000014441	CSF1R	0.267402	-1.90292	5.30672e-09	1.61802e-06	down	yes	12.3228	4.42678	8.77211	36.1176	33.7569	25.5687
ssc05200	Human Diseases	Cancer: overview	Pathways in cancer	0.00430252	0.0451428	ENSSSCG00000017755	NOS2	0.297181	-1.75059	1.84656e-07	3.90812e-05	down	yes	2.46124	2.02222	2.07884	9.86271	8.36997	3.84918
ssc05200	Human Diseases	Cancer: overview	Pathways in cancer	0.00430252	0.0451428	ENSSSCG00000013237	SPI1	0.398203	-1.32842	4.06709e-07	7.41587e-05	down	yes	11.5438	7.67205	9.23279	28.2218	26.2191	17.0016
ssc05200	Human Diseases	Cancer: overview	Pathways in cancer	0.00430252	0.0451428	ENSSSCG00000000884	APAF1	0.352906	-1.50264	6.00109e-07	0.00010537	down	yes	5.15605	6.92886	7.05755	23.5103	19.6224	11.1096
ssc05200	Human Diseases	Cancer: overview	Pathways in cancer	0.00430252	0.0451428	ENSSSCG00000031912	JUN	2.12853	1.08985	7.09926e-07	0.000121065	up	yes	146.559	238.531	232.136	108.009	103.724	78.2458
ssc05200	Human Diseases	Cancer: overview	Pathways in cancer	0.00430252	0.0451428	ENSSSCG00000038694	CCND2	2.82238	1.49691	3.51989e-06	0.000482286	up	yes	2.2395	2.26468	1.56766	0.690152	0.583219	0.877948
ssc05200	Human Diseases	Cancer: overview	Pathways in cancer	0.00430252	0.0451428	ENSSSCG00000002960	RASGRP4	0.30911	-1.69381	1.28749e-05	0.00130421	down	yes	1.26098	0.591939	0.89653	3.87169	3.19924	1.82377
ssc05200	Human Diseases	Cancer: overview	Pathways in cancer	0.00430252	0.0451428	ENSSSCG00000000136	CSF2RB	0.259822	-1.9444	1.87754e-05	0.00176608	down	yes	0.974381	0.346324	0.321221	2.61115	2.19017	1.5181
ssc05200	Human Diseases	Cancer: overview	Pathways in cancer	0.00430252	0.0451428	ENSSSCG00000009031	EDNRA	0.493443	-1.01905	2.44207e-05	0.00218858	down	yes	4.47861	3.09206	4.08091	9.60955	7.74763	6.25565
ssc05200	Human Diseases	Cancer: overview	Pathways in cancer	0.00430252	0.0451428	ENSSSCG00000015556	LAMC2	0.383146	-1.38403	2.49125e-05	0.00220345	down	yes	4.45587	5.68009	5.54977	17.6243	15.8388	7.47622
ssc05200	Human Diseases	Cancer: overview	Pathways in cancer	0.00430252	0.0451428	ENSSSCG00000039416	CXCR4	0.353752	-1.49919	8.43721e-05	0.00557091	down	yes	2.88652	1.8953	2.56487	9.5084	7.60031	3.65923
ssc05200	Human Diseases	Cancer: overview	Pathways in cancer	0.00430252	0.0451428	ENSSSCG00000039535	CAMK2B	0.0501412	-4.31786	0.00011841	0.0073067	down	yes	0.0813007	0	0.049531	1.51878	1.04571	0.0447753
ssc05200	Human Diseases	Cancer: overview	Pathways in cancer	0.00430252	0.0451428	ENSSSCG00000031736	MGST2	2.03303	1.02363	0.000243307	0.0125681	up	yes	15.4175	19.1406	16.8528	10.2348	10.5673	4.48566
ssc05200	Human Diseases	Cancer: overview	Pathways in cancer	0.00430252	0.0451428	ENSSSCG00000002383	FOS	2.65249	1.40735	0.000341806	0.0164344	up	yes	51.7257	134.672	160.001	61.4612	50.8367	18.2962
ssc05200	Human Diseases	Cancer: overview	Pathways in cancer	0.00430252	0.0451428	ENSSSCG00000034767	LAMA1	10.9754	3.4562	0.000363827	0.0170438	up	yes	0.069928	0.115821	0.066322	0.010591	0.012376	0
ssc05200	Human Diseases	Cancer: overview	Pathways in cancer	0.00430252	0.0451428	ENSSSCG00000007436	MMP9	0.112103	-3.1571	0.000519315	0.0219036	down	yes	0.544271	0.755057	2.65784	5.2783	8.88265	21.1384
ssc05200	Human Diseases	Cancer: overview	Pathways in cancer	0.00430252	0.0451428	ENSSSCG00000006095	CCNE2	0.430658	-1.21539	0.000745772	0.0287444	down	yes	1.26223	1.7483	2.01328	4.72691	4.49502	2.4435
ssc05200	Human Diseases	Cancer: overview	Pathways in cancer	0.00430252	0.0451428	ENSSSCG00000010949	DAPK1	0.382112	-1.38793	0.0011241	0.039133	down	yes	1.72233	1.1468	2.38827	6.56788	5.1557	2.0352
ssc05200	Human Diseases	Cancer: overview	Pathways in cancer	0.00430252	0.0451428	ENSSSCG00000035537	RUNX1	0.47027	-1.08844	0.00118562	0.0404374	down	yes	0.761275	0.845569	0.951095	2.4498	1.82238	1.16712
ssc05200	Human Diseases	Cancer: overview	Pathways in cancer	0.00430252	0.0451428	ENSSSCG00000063008	ITGA2B	0.325185	-1.62067	0.00150106	0.0486746	down	yes	1.49931	0.648918	1.18789	4.51148	4.56509	1.18256
ssc05020	Human Diseases	Neurodegenerative disease	Prion disease	0.00439132	0.0451428	ENSSSCG00000036246	GP91-PHOX	0.200829	-2.31596	4.81254e-17	1.14077e-13	down	yes	1.41299	0.869504	1.42653	7.58359	6.22046	4.66449
ssc05020	Human Diseases	Neurodegenerative disease	Prion disease	0.00439132	0.0451428	ENSSSCG00000015559	NCF2	0.284689	-1.81254	3.01621e-08	7.37074e-06	down	yes	4.1099	5.70611	3.65919	20.5328	16.8971	9.90324
ssc05020	Human Diseases	Neurodegenerative disease	Prion disease	0.00439132	0.0451428	ENSSSCG00000000884	APAF1	0.352906	-1.50264	6.00109e-07	0.00010537	down	yes	5.15605	6.92886	7.05755	23.5103	19.6224	11.1096
ssc05020	Human Diseases	Neurodegenerative disease	Prion disease	0.00439132	0.0451428	ENSSSCG00000000137	NCF4	0.258713	-1.95058	2.37138e-06	0.000346983	down	yes	0.775695	0.438192	0.616963	3.47558	2.49187	1.10932
ssc05020	Human Diseases	Neurodegenerative disease	Prion disease	0.00439132	0.0451428	ENSSSCG00000033512	C1QB	0.26517	-1.91501	4.73731e-06	0.00061029	down	yes	10.4582	3.23701	10.7569	39.6548	34.5555	18.0026
ssc05020	Human Diseases	Neurodegenerative disease	Prion disease	0.00439132	0.0451428	ENSSSCG00000031493	CYBA	0.484405	-1.04571	6.1941e-06	0.000744135	down	yes	18.5076	12.3092	16.8515	34.3191	35.7459	28.3407
ssc05020	Human Diseases	Neurodegenerative disease	Prion disease	0.00439132	0.0451428	ENSSSCG00000005400	GRIN3A	3.07562	1.62088	7.19319e-06	0.000831617	up	yes	0.886578	0.630603	1.09641	0.319999	0.172159	0.357617
ssc05020	Human Diseases	Neurodegenerative disease	Prion disease	0.00439132	0.0451428	ENSSSCG00000038706	C1QC	0.258447	-1.95206	7.68691e-06	0.000876807	down	yes	22.6937	5.30699	16.674	71.3082	65.8292	35.7209
ssc05020	Human Diseases	Neurodegenerative disease	Prion disease	0.00439132	0.0451428	ENSSSCG00000016856	C9	0.46333	-1.10989	1.55398e-05	0.00152213	down	yes	14.5487	9.88828	8.37926	25.4552	24.1392	21.2326
ssc05020	Human Diseases	Neurodegenerative disease	Prion disease	0.00439132	0.0451428	ENSSSCG00000003524	C1QA	0.251856	-1.98933	3.82937e-05	0.00308746	down	yes	12.7526	3.09395	14.2621	53.4073	45.0747	21.0653
ssc05020	Human Diseases	Neurodegenerative disease	Prion disease	0.00439132	0.0451428	ENSSSCG00000007722	NCF1	0.251899	-1.98908	3.84727e-05	0.00309138	down	yes	0.231731	0.167342	0.273456	1.11024	0.940043	0.619553
ssc05020	Human Diseases	Neurodegenerative disease	Prion disease	0.00439132	0.0451428	ENSSSCG00000039214	ENSSSCG00000039214	0.0285872	-5.12849	6.6841e-05	0.00472955	down	yes	0.071811	0	0	1.28911	1.08481	0.138086
ssc05020	Human Diseases	Neurodegenerative disease	Prion disease	0.00439132	0.0451428	ENSSSCG00000041764	CACNA1C	0.417116	-1.26148	0.000233939	0.0122413	down	yes	0.652194	0.690959	0.533839	1.75916	1.81219	0.928585
ssc05020	Human Diseases	Neurodegenerative disease	Prion disease	0.00439132	0.0451428	ENSSSCG00000008090	IL1A	0.0874798	-3.51491	0.000343591	0.0164868	down	yes	0	0.138294	0.158153	1.4831	1.47258	0.433082
ssc05020	Human Diseases	Neurodegenerative disease	Prion disease	0.00439132	0.0451428	ENSSSCG00000058790	RYR1	0.0971762	-3.36325	0.000776237	0.0294871	down	yes	0.00557775	0	0.0358295	0.155492	0.194144	0.0764682
ssc04080	Environmental Information Processing	Signaling molecules and interaction	Neuroactive ligand-receptor interaction	0.00506603	0.0492074	ENSSSCG00000013551	C3	0.273533	-1.87021	4.05676e-13	3.19253e-10	down	yes	1.3987	1.41272	1.78552	4.82431	5.37869	6.60276
ssc04080	Environmental Information Processing	Signaling molecules and interaction	Neuroactive ligand-receptor interaction	0.00506603	0.0492074	ENSSSCG00000056729	C5AR1	0.236098	-2.08254	2.28788e-12	1.46573e-09	down	yes	2.21547	1.21498	1.25217	6.60772	6.98553	6.24011
ssc04080	Environmental Information Processing	Signaling molecules and interaction	Neuroactive ligand-receptor interaction	0.00506603	0.0492074	ENSSSCG00000017998	GLP2R	0.0972928	-3.36152	5.79201e-09	1.731e-06	down	yes	0.237955	0.139148	0.081996	0.663106	1.40408	2.65155
ssc04080	Environmental Information Processing	Signaling molecules and interaction	Neuroactive ligand-receptor interaction	0.00506603	0.0492074	ENSSSCG00000025188	LEPR	0.0791261	-3.6597	1.14459e-07	2.60878e-05	down	yes	0.0386506	0.00801101	0.0293131	0.470512	0.353102	0.136558
ssc04080	Environmental Information Processing	Signaling molecules and interaction	Neuroactive ligand-receptor interaction	0.00506603	0.0492074	ENSSSCG00000024072	P2RY11	0.271345	-1.8818	1.14814e-06	0.000187692	down	yes	0.349676	0.436646	0.528987	1.556	1.75261	1.53876
ssc04080	Environmental Information Processing	Signaling molecules and interaction	Neuroactive ligand-receptor interaction	0.00506603	0.0492074	ENSSSCG00000016672	ADCYAP1R1	0.327174	-1.61187	2.95446e-06	0.000417083	down	yes	3.85209	2.29967	6.26769	12.101	11.4899	14.3689
ssc04080	Environmental Information Processing	Signaling molecules and interaction	Neuroactive ligand-receptor interaction	0.00506603	0.0492074	ENSSSCG00000056826	CHRNB1	2.14019	1.09774	5.67805e-06	0.000690218	up	yes	7.68902	8.65116	11.257	3.74546	4.00549	5.14377
ssc04080	Environmental Information Processing	Signaling molecules and interaction	Neuroactive ligand-receptor interaction	0.00506603	0.0492074	ENSSSCG00000005400	GRIN3A	3.07562	1.62088	7.19319e-06	0.000831617	up	yes	0.886578	0.630603	1.09641	0.319999	0.172159	0.357617
ssc04080	Environmental Information Processing	Signaling molecules and interaction	Neuroactive ligand-receptor interaction	0.00506603	0.0492074	ENSSSCG00000009031	EDNRA	0.493443	-1.01905	2.44207e-05	0.00218858	down	yes	4.47861	3.09206	4.08091	9.60955	7.74763	6.25565
ssc04080	Environmental Information Processing	Signaling molecules and interaction	Neuroactive ligand-receptor interaction	0.00506603	0.0492074	ENSSSCG00000013261	CHRM4	0.000540989	-10.8521	2.46284e-05	0.0021947	down	yes	0	0	0	0.289203	0.215997	0.04934
ssc04080	Environmental Information Processing	Signaling molecules and interaction	Neuroactive ligand-receptor interaction	0.00506603	0.0492074	ENSSSCG00000031788	PTAFR	0.337606	-1.56659	5.3237e-05	0.00394353	down	yes	0.936501	0.692327	0.661848	3.30841	2.16544	1.31122
ssc04080	Environmental Information Processing	Signaling molecules and interaction	Neuroactive ligand-receptor interaction	0.00506603	0.0492074	ENSSSCG00000058656	P2RY1	0.47941	-1.06067	5.76827e-05	0.0041974	down	yes	1.13993	0.940842	0.929237	2.39379	2.06599	1.8188
ssc04080	Environmental Information Processing	Signaling molecules and interaction	Neuroactive ligand-receptor interaction	0.00506603	0.0492074	ENSSSCG00000010101	P2RX6	0.427115	-1.2273	0.000160802	0.00927412	down	yes	4.43037	2.34832	5.7121	10.4058	10.4366	8.40212
ssc04080	Environmental Information Processing	Signaling molecules and interaction	Neuroactive ligand-receptor interaction	0.00506603	0.0492074	ENSSSCG00000009336	RXFP2	0.0361934	-4.78813	0.000204985	0.0111444	down	yes	0.609564	0.0272974	0.312289	14.8623	10.2652	1.09691
ssc04080	Environmental Information Processing	Signaling molecules and interaction	Neuroactive ligand-receptor interaction	0.00506603	0.0492074	ENSSSCG00000016403	VIPR2	0.275852	-1.85804	0.000272032	0.0136315	down	yes	0.626636	0.469111	0.320255	2.30952	2.08446	0.739222
ssc04080	Environmental Information Processing	Signaling molecules and interaction	Neuroactive ligand-receptor interaction	0.00506603	0.0492074	ENSSSCG00000009160	TACR3	0.00149172	-9.38881	0.000391678	0.0180278	down	yes	0	0	0	0.045813	0.120102	0.035195
ssc04080	Environmental Information Processing	Signaling molecules and interaction	Neuroactive ligand-receptor interaction	0.00506603	0.0492074	ENSSSCG00000006503	RXFP4	0.186382	-2.42367	0.00122282	0.0413492	down	yes	0.094831	0.099791	0.028213	0.612094	0.452954	0.130535
ssc05145	Human Diseases	Infectious disease: parasitic	Toxoplasmosis	0.00526466	0.0492074	ENSSSCG00000009002	TLR2	0.261758	-1.9337	1.45329e-12	9.84254e-10	down	yes	0.242131	0.198378	0.235175	0.963629	0.920697	0.697003
ssc05145	Human Diseases	Infectious disease: parasitic	Toxoplasmosis	0.00526466	0.0492074	ENSSSCG00000017755	NOS2	0.297181	-1.75059	1.84656e-07	3.90812e-05	down	yes	2.46124	2.02222	2.07884	9.86271	8.36997	3.84918
ssc05145	Human Diseases	Infectious disease: parasitic	Toxoplasmosis	0.00526466	0.0492074	ENSSSCG00000024344	CCR5	0.249042	-2.00554	4.44359e-06	0.000581938	down	yes	0.837351	0.312658	1.13779	3.60922	3.42421	2.15298
ssc05145	Human Diseases	Infectious disease: parasitic	Toxoplasmosis	0.00526466	0.0492074	ENSSSCG00000015085	IL10RA	0.364607	-1.45559	8.77386e-06	0.000976412	down	yes	5.06632	2.05011	3.03242	10.5086	9.92731	7.39915
ssc05145	Human Diseases	Infectious disease: parasitic	Toxoplasmosis	0.00526466	0.0492074	ENSSSCG00000017991	PIK3R5	0.434454	-1.20272	1.8338e-05	0.00173181	down	yes	1.1792	0.846518	1.06752	2.17675	2.86488	2.07819
ssc05145	Human Diseases	Infectious disease: parasitic	Toxoplasmosis	0.00526466	0.0492074	ENSSSCG00000015556	LAMC2	0.383146	-1.38403	2.49125e-05	0.00220345	down	yes	4.45587	5.68009	5.54977	17.6243	15.8388	7.47622
ssc05145	Human Diseases	Infectious disease: parasitic	Toxoplasmosis	0.00526466	0.0492074	ENSSSCG00000005503	TLR4	0.48183	-1.0534	4.41424e-05	0.00341945	down	yes	1.89913	1.43729	1.84978	4.41603	3.74549	2.60203
ssc05145	Human Diseases	Infectious disease: parasitic	Toxoplasmosis	0.00526466	0.0492074	ENSSSCG00000034767	LAMA1	10.9754	3.4562	0.000363827	0.0170438	up	yes	0.069928	0.115821	0.066322	0.010591	0.012376	0
ssc05321	Human Diseases	Immune disease	Inflammatory bowel disease	0.00536111	0.0492074	ENSSSCG00000009002	TLR2	0.261758	-1.9337	1.45329e-12	9.84254e-10	down	yes	0.242131	0.198378	0.235175	0.963629	0.920697	0.697003
ssc05321	Human Diseases	Immune disease	Inflammatory bowel disease	0.00536111	0.0492074	ENSSSCG00000012397	IL2RG	0.298773	-1.74288	1.05221e-11	5.80037e-09	down	yes	4.1612	2.96118	4.3484	15.2717	12.9891	10.1322
ssc05321	Human Diseases	Immune disease	Inflammatory bowel disease	0.00536111	0.0492074	ENSSSCG00000031912	JUN	2.12853	1.08985	7.09926e-07	0.000121065	up	yes	146.559	238.531	232.136	108.009	103.724	78.2458
ssc05321	Human Diseases	Immune disease	Inflammatory bowel disease	0.00536111	0.0492074	ENSSSCG00000005503	TLR4	0.48183	-1.0534	4.41424e-05	0.00341945	down	yes	1.89913	1.43729	1.84978	4.41603	3.74549	2.60203
ssc05321	Human Diseases	Immune disease	Inflammatory bowel disease	0.00536111	0.0492074	ENSSSCG00000039214	ENSSSCG00000039214	0.0285872	-5.12849	6.6841e-05	0.00472955	down	yes	0.071811	0	0	1.28911	1.08481	0.138086
ssc05321	Human Diseases	Immune disease	Inflammatory bowel disease	0.00536111	0.0492074	ENSSSCG00000008090	IL1A	0.0874798	-3.51491	0.000343591	0.0164868	down	yes	0	0.138294	0.158153	1.4831	1.47258	0.433082
ssc05202	Human Diseases	Cancer: overview	Transcriptional misregulation in cancer	0.00624359	0.0553311	ENSSSCG00000007032	PLAT	0.3529	-1.50267	7.32948e-13	5.10994e-10	down	yes	14.0966	15.9588	15.708	50.3654	45.4785	33.8341
ssc05202	Human Diseases	Cancer: overview	Transcriptional misregulation in cancer	0.00624359	0.0553311	ENSSSCG00000035249	GADD45G	2.50964	1.32748	1.97273e-12	1.29893e-09	up	yes	138.309	123.41	124.43	59.6796	57.9817	36.2047
ssc05202	Human Diseases	Cancer: overview	Transcriptional misregulation in cancer	0.00624359	0.0553311	ENSSSCG00000014441	CSF1R	0.267402	-1.90292	5.30672e-09	1.61802e-06	down	yes	12.3228	4.42678	8.77211	36.1176	33.7569	25.5687
ssc05202	Human Diseases	Cancer: overview	Transcriptional misregulation in cancer	0.00624359	0.0553311	ENSSSCG00000013237	SPI1	0.398203	-1.32842	4.06709e-07	7.41587e-05	down	yes	11.5438	7.67205	9.23279	28.2218	26.2191	17.0016
ssc05202	Human Diseases	Cancer: overview	Transcriptional misregulation in cancer	0.00624359	0.0553311	ENSSSCG00000014369	CD14	0.373648	-1.42025	2.43896e-06	0.000354681	down	yes	2.57021	3.02635	4.03999	10.4672	9.46869	5.85457
ssc05202	Human Diseases	Cancer: overview	Transcriptional misregulation in cancer	0.00624359	0.0553311	ENSSSCG00000038694	CCND2	2.82238	1.49691	3.51989e-06	0.000482286	up	yes	2.2395	2.26468	1.56766	0.690152	0.583219	0.877948
ssc05202	Human Diseases	Cancer: overview	Transcriptional misregulation in cancer	0.00624359	0.0553311	ENSSSCG00000005087	SIX1	2.1336	1.09329	2.99425e-05	0.00251687	up	yes	21.1892	21.9452	27.1795	8.06506	10.1573	14.7332
ssc05202	Human Diseases	Cancer: overview	Transcriptional misregulation in cancer	0.00624359	0.0553311	ENSSSCG00000005089	SIX4	2.35162	1.23366	0.000147628	0.0087924	up	yes	0.92555	1.16051	2.07499	0.685045	0.599989	0.484403
ssc05202	Human Diseases	Cancer: overview	Transcriptional misregulation in cancer	0.00624359	0.0553311	ENSSSCG00000023324	KMT2A	0.452616	-1.14364	0.00035746	0.0168454	down	yes	2.53814	1.75899	2.06848	6.04121	5.38874	2.63409
ssc05202	Human Diseases	Cancer: overview	Transcriptional misregulation in cancer	0.00624359	0.0553311	ENSSSCG00000007436	MMP9	0.112103	-3.1571	0.000519315	0.0219036	down	yes	0.544271	0.755057	2.65784	5.2783	8.88265	21.1384
ssc05202	Human Diseases	Cancer: overview	Transcriptional misregulation in cancer	0.00624359	0.0553311	ENSSSCG00000035537	RUNX1	0.47027	-1.08844	0.00118562	0.0404374	down	yes	0.761275	0.845569	0.951095	2.4498	1.82238	1.16712
ssc04926	Organismal Systems	Endocrine system	Relaxin signaling pathway	0.00653711	0.0560013	ENSSSCG00000014852	ARRB1	0.409585	-1.28776	4.25724e-10	1.73989e-07	down	yes	4.0559	2.85499	3.12716	9.11295	8.37177	7.02312
ssc04926	Organismal Systems	Endocrine system	Relaxin signaling pathway	0.00653711	0.0560013	ENSSSCG00000017755	NOS2	0.297181	-1.75059	1.84656e-07	3.90812e-05	down	yes	2.46124	2.02222	2.07884	9.86271	8.36997	3.84918
ssc04926	Organismal Systems	Endocrine system	Relaxin signaling pathway	0.00653711	0.0560013	ENSSSCG00000031912	JUN	2.12853	1.08985	7.09926e-07	0.000121065	up	yes	146.559	238.531	232.136	108.009	103.724	78.2458
ssc04926	Organismal Systems	Endocrine system	Relaxin signaling pathway	0.00653711	0.0560013	ENSSSCG00000039841	SHC3	0.0303958	-5.03999	0.000150148	0.00883263	down	yes	0	0	0.0177165	0.192635	0.123226	0.267002
ssc04926	Organismal Systems	Endocrine system	Relaxin signaling pathway	0.00653711	0.0560013	ENSSSCG00000016450	NOS3	0.432766	-1.20834	0.000155416	0.00902937	down	yes	19.8828	15.445	15.7595	51.4707	45.3423	21.2353
ssc04926	Organismal Systems	Endocrine system	Relaxin signaling pathway	0.00653711	0.0560013	ENSSSCG00000009336	RXFP2	0.0361934	-4.78813	0.000204985	0.0111444	down	yes	0.609564	0.0272974	0.312289	14.8623	10.2652	1.09691
ssc04926	Organismal Systems	Endocrine system	Relaxin signaling pathway	0.00653711	0.0560013	ENSSSCG00000002383	FOS	2.65249	1.40735	0.000341806	0.0164344	up	yes	51.7257	134.672	160.001	61.4612	50.8367	18.2962
ssc04926	Organismal Systems	Endocrine system	Relaxin signaling pathway	0.00653711	0.0560013	ENSSSCG00000007436	MMP9	0.112103	-3.1571	0.000519315	0.0219036	down	yes	0.544271	0.755057	2.65784	5.2783	8.88265	21.1384
ssc04926	Organismal Systems	Endocrine system	Relaxin signaling pathway	0.00653711	0.0560013	ENSSSCG00000006503	RXFP4	0.186382	-2.42367	0.00122282	0.0413492	down	yes	0.094831	0.099791	0.028213	0.612094	0.452954	0.130535
ssc05031	Human Diseases	Substance dependence	Amphetamine addiction	0.00730845	0.0605894	ENSSSCG00000031912	JUN	2.12853	1.08985	7.09926e-07	0.000121065	up	yes	146.559	238.531	232.136	108.009	103.724	78.2458
ssc05031	Human Diseases	Substance dependence	Amphetamine addiction	0.00730845	0.0605894	ENSSSCG00000005400	GRIN3A	3.07562	1.62088	7.19319e-06	0.000831617	up	yes	0.886578	0.630603	1.09641	0.319999	0.172159	0.357617
ssc05031	Human Diseases	Substance dependence	Amphetamine addiction	0.00730845	0.0605894	ENSSSCG00000039535	CAMK2B	0.0501412	-4.31786	0.00011841	0.0073067	down	yes	0.0813007	0	0.049531	1.51878	1.04571	0.0447753
ssc05031	Human Diseases	Substance dependence	Amphetamine addiction	0.00730845	0.0605894	ENSSSCG00000041764	CACNA1C	0.417116	-1.26148	0.000233939	0.0122413	down	yes	0.652194	0.690959	0.533839	1.75916	1.81219	0.928585
ssc05031	Human Diseases	Substance dependence	Amphetamine addiction	0.00730845	0.0605894	ENSSSCG00000002383	FOS	2.65249	1.40735	0.000341806	0.0164344	up	yes	51.7257	134.672	160.001	61.4612	50.8367	18.2962
ssc05031	Human Diseases	Substance dependence	Amphetamine addiction	0.00730845	0.0605894	ENSSSCG00000009601	SLC18A1	0.126732	-2.98014	0.000345946	0.0165372	down	yes	0.294342	0.035834	0.026567	1.09263	1.22866	0.493638
ssc05144	Human Diseases	Infectious disease: parasitic	Malaria	0.00778745	0.062543	ENSSSCG00000009002	TLR2	0.261758	-1.9337	1.45329e-12	9.84254e-10	down	yes	0.242131	0.198378	0.235175	0.963629	0.920697	0.697003
ssc05144	Human Diseases	Infectious disease: parasitic	Malaria	0.00778745	0.062543	ENSSSCG00000015405	ENSSSCG00000015405	0.285037	-1.81078	4.64856e-09	1.46919e-06	down	yes	2.24569	1.27234	1.56819	6.5817	6.48757	4.7748
ssc05144	Human Diseases	Infectious disease: parasitic	Malaria	0.00778745	0.062543	ENSSSCG00000025133	ITGB2	0.381078	-1.39184	2.91286e-07	5.70633e-05	down	yes	2.92941	1.79459	2.96807	5.92198	6.52439	7.73865
ssc05144	Human Diseases	Infectious disease: parasitic	Malaria	0.00778745	0.062543	ENSSSCG00000005503	TLR4	0.48183	-1.0534	4.41424e-05	0.00341945	down	yes	1.89913	1.43729	1.84978	4.41603	3.74549	2.60203
ssc05144	Human Diseases	Infectious disease: parasitic	Malaria	0.00778745	0.062543	ENSSSCG00000039214	ENSSSCG00000039214	0.0285872	-5.12849	6.6841e-05	0.00472955	down	yes	0.071811	0	0	1.28911	1.08481	0.138086
ssc05332	Human Diseases	Immune disease	Graft-versus-host disease	0.00865033	0.0673677	ENSSSCG00000052432	ENSSSCG00000052432	0.352776	-1.50318	6.48008e-07	0.000112119	down	yes	243.665	117.407	228.564	668.892	616.582	385.948
ssc05332	Human Diseases	Immune disease	Graft-versus-host disease	0.00865033	0.0673677	ENSSSCG00000039214	ENSSSCG00000039214	0.0285872	-5.12849	6.6841e-05	0.00472955	down	yes	0.071811	0	0	1.28911	1.08481	0.138086
ssc05332	Human Diseases	Immune disease	Graft-versus-host disease	0.00865033	0.0673677	ENSSSCG00000001229	ENSSSCG00000001229	0.42378	-1.23861	7.47488e-05	0.00511122	down	yes	92.9244	55.0207	64.4142	218.512	183.604	98.9914
ssc05332	Human Diseases	Immune disease	Graft-versus-host disease	0.00865033	0.0673677	ENSSSCG00000008090	IL1A	0.0874798	-3.51491	0.000343591	0.0164868	down	yes	0	0.138294	0.158153	1.4831	1.47258	0.433082
ssc05167	Human Diseases	Infectious disease: viral	Kaposi sarcoma-associated herpesvirus infection	0.00974947	0.0736945	ENSSSCG00000011925	CD200R1	0.237994	-2.071	2.64507e-13	2.23924e-10	down	yes	0.888503	0.980895	1.28684	5.20283	4.65763	3.40139
ssc05167	Human Diseases	Infectious disease: viral	Kaposi sarcoma-associated herpesvirus infection	0.00974947	0.0736945	ENSSSCG00000011322	CCR1	0.091636	-3.44794	3.63366e-13	2.97008e-10	down	yes	0.170582	0.590019	0.819318	5.88509	6.61595	4.74021
ssc05167	Human Diseases	Infectious disease: viral	Kaposi sarcoma-associated herpesvirus infection	0.00974947	0.0736945	ENSSSCG00000013551	C3	0.273533	-1.87021	4.05676e-13	3.19253e-10	down	yes	1.3987	1.41272	1.78552	4.82431	5.37869	6.60276
ssc05167	Human Diseases	Infectious disease: viral	Kaposi sarcoma-associated herpesvirus infection	0.00974947	0.0736945	ENSSSCG00000024311	CCR2	0.108001	-3.21089	1.93508e-11	9.75939e-09	down	yes	0.211259	0.0428126	0.117214	1.46904	1.10976	0.859002
ssc05167	Human Diseases	Infectious disease: viral	Kaposi sarcoma-associated herpesvirus infection	0.00974947	0.0736945	ENSSSCG00000052432	ENSSSCG00000052432	0.352776	-1.50318	6.48008e-07	0.000112119	down	yes	243.665	117.407	228.564	668.892	616.582	385.948
ssc05167	Human Diseases	Infectious disease: viral	Kaposi sarcoma-associated herpesvirus infection	0.00974947	0.0736945	ENSSSCG00000031912	JUN	2.12853	1.08985	7.09926e-07	0.000121065	up	yes	146.559	238.531	232.136	108.009	103.724	78.2458
ssc05167	Human Diseases	Infectious disease: viral	Kaposi sarcoma-associated herpesvirus infection	0.00974947	0.0736945	ENSSSCG00000024344	CCR5	0.249042	-2.00554	4.44359e-06	0.000581938	down	yes	0.837351	0.312658	1.13779	3.60922	3.42421	2.15298
ssc05167	Human Diseases	Infectious disease: viral	Kaposi sarcoma-associated herpesvirus infection	0.00974947	0.0736945	ENSSSCG00000017991	PIK3R5	0.434454	-1.20272	1.8338e-05	0.00173181	down	yes	1.1792	0.846518	1.06752	2.17675	2.86488	2.07819
ssc05167	Human Diseases	Infectious disease: viral	Kaposi sarcoma-associated herpesvirus infection	0.00974947	0.0736945	ENSSSCG00000001229	ENSSSCG00000001229	0.42378	-1.23861	7.47488e-05	0.00511122	down	yes	92.9244	55.0207	64.4142	218.512	183.604	98.9914
ssc05167	Human Diseases	Infectious disease: viral	Kaposi sarcoma-associated herpesvirus infection	0.00974947	0.0736945	ENSSSCG00000028056	ZFP36	2.01672	1.01201	0.00015434	0.00900394	up	yes	103.81	216.363	207.51	100.22	96.6212	64.8132
ssc05167	Human Diseases	Infectious disease: viral	Kaposi sarcoma-associated herpesvirus infection	0.00974947	0.0736945	ENSSSCG00000002383	FOS	2.65249	1.40735	0.000341806	0.0164344	up	yes	51.7257	134.672	160.001	61.4612	50.8367	18.2962
ssc05222	Human Diseases	Cancer: specific types	Small cell lung cancer	0.0109439	0.0803598	ENSSSCG00000035249	GADD45G	2.50964	1.32748	1.97273e-12	1.29893e-09	up	yes	138.309	123.41	124.43	59.6796	57.9817	36.2047
ssc05222	Human Diseases	Cancer: specific types	Small cell lung cancer	0.0109439	0.0803598	ENSSSCG00000017755	NOS2	0.297181	-1.75059	1.84656e-07	3.90812e-05	down	yes	2.46124	2.02222	2.07884	9.86271	8.36997	3.84918
ssc05222	Human Diseases	Cancer: specific types	Small cell lung cancer	0.0109439	0.0803598	ENSSSCG00000000884	APAF1	0.352906	-1.50264	6.00109e-07	0.00010537	down	yes	5.15605	6.92886	7.05755	23.5103	19.6224	11.1096
ssc05222	Human Diseases	Cancer: specific types	Small cell lung cancer	0.0109439	0.0803598	ENSSSCG00000015556	LAMC2	0.383146	-1.38403	2.49125e-05	0.00220345	down	yes	4.45587	5.68009	5.54977	17.6243	15.8388	7.47622
ssc05222	Human Diseases	Cancer: specific types	Small cell lung cancer	0.0109439	0.0803598	ENSSSCG00000034767	LAMA1	10.9754	3.4562	0.000363827	0.0170438	up	yes	0.069928	0.115821	0.066322	0.010591	0.012376	0
ssc05222	Human Diseases	Cancer: specific types	Small cell lung cancer	0.0109439	0.0803598	ENSSSCG00000006095	CCNE2	0.430658	-1.21539	0.000745772	0.0287444	down	yes	1.26223	1.7483	2.01328	4.72691	4.49502	2.4435
ssc05222	Human Diseases	Cancer: specific types	Small cell lung cancer	0.0109439	0.0803598	ENSSSCG00000063008	ITGA2B	0.325185	-1.62067	0.00150106	0.0486746	down	yes	1.49931	0.648918	1.18789	4.51148	4.56509	1.18256
ssc04115	Cellular Processes	Cell growth and death	p53 signaling pathway	0.0126562	0.0903515	ENSSSCG00000035249	GADD45G	2.50964	1.32748	1.97273e-12	1.29893e-09	up	yes	138.309	123.41	124.43	59.6796	57.9817	36.2047
ssc04115	Cellular Processes	Cell growth and death	p53 signaling pathway	0.0126562	0.0903515	ENSSSCG00000009633	ENSSSCG00000009633	0.340632	-1.55371	4.99525e-10	2.00691e-07	down	yes	10.7651	11.8382	10.0347	39.7181	34.0498	22.0479
ssc04115	Cellular Processes	Cell growth and death	p53 signaling pathway	0.0126562	0.0903515	ENSSSCG00000000884	APAF1	0.352906	-1.50264	6.00109e-07	0.00010537	down	yes	5.15605	6.92886	7.05755	23.5103	19.6224	11.1096
ssc04115	Cellular Processes	Cell growth and death	p53 signaling pathway	0.0126562	0.0903515	ENSSSCG00000038694	CCND2	2.82238	1.49691	3.51989e-06	0.000482286	up	yes	2.2395	2.26468	1.56766	0.690152	0.583219	0.877948
ssc04115	Cellular Processes	Cell growth and death	p53 signaling pathway	0.0126562	0.0903515	ENSSSCG00000058071	ENSSSCG00000058071	0.305699	-1.70982	3.3132e-05	0.00274602	down	yes	3.6129	2.25998	5.42536	16.9983	14.0993	5.86118
ssc04115	Cellular Processes	Cell growth and death	p53 signaling pathway	0.0126562	0.0903515	ENSSSCG00000006095	CCNE2	0.430658	-1.21539	0.000745772	0.0287444	down	yes	1.26223	1.7483	2.01328	4.72691	4.49502	2.4435
ssc04611	Organismal Systems	Immune system	Platelet activation	0.0136512	0.0948207	ENSSSCG00000011713	P2RY12	0.0981587	-3.34874	7.20477e-18	1.89758e-14	down	yes	0.239132	0.118523	0.21771	2.8414	1.60344	1.41674
ssc04611	Organismal Systems	Immune system	Platelet activation	0.0136512	0.0948207	ENSSSCG00000017991	PIK3R5	0.434454	-1.20272	1.8338e-05	0.00173181	down	yes	1.1792	0.846518	1.06752	2.17675	2.86488	2.07819
ssc04611	Organismal Systems	Immune system	Platelet activation	0.0136512	0.0948207	ENSSSCG00000058656	P2RY1	0.47941	-1.06067	5.76827e-05	0.0041974	down	yes	1.13993	0.940842	0.929237	2.39379	2.06599	1.8188
ssc04611	Organismal Systems	Immune system	Platelet activation	0.0136512	0.0948207	ENSSSCG00000017006	LCP2	0.344998	-1.53534	0.000108824	0.00682426	down	yes	1.09894	0.846338	1.38263	4.3203	3.84813	1.47774
ssc04611	Organismal Systems	Immune system	Platelet activation	0.0136512	0.0948207	ENSSSCG00000013041	FERMT3	0.376967	-1.40749	0.000128655	0.00777967	down	yes	4.49786	1.60363	3.43956	9.68504	9.38399	6.241
ssc04611	Organismal Systems	Immune system	Platelet activation	0.0136512	0.0948207	ENSSSCG00000016450	NOS3	0.432766	-1.20834	0.000155416	0.00902937	down	yes	19.8828	15.445	15.7595	51.4707	45.3423	21.2353
ssc04611	Organismal Systems	Immune system	Platelet activation	0.0136512	0.0948207	ENSSSCG00000006357	FCER1G	0.444342	-1.17026	0.00142656	0.046706	down	yes	26.3364	10.6467	21.8834	58.2995	44.452	29.7286
ssc04611	Organismal Systems	Immune system	Platelet activation	0.0136512	0.0948207	ENSSSCG00000063008	ITGA2B	0.325185	-1.62067	0.00150106	0.0486746	down	yes	1.49931	0.648918	1.18789	4.51148	4.56509	1.18256
ssc04064	Environmental Information Processing	Signal transduction	NF-kappa B signaling pathway	0.0159366	0.107782	ENSSSCG00000035249	GADD45G	2.50964	1.32748	1.97273e-12	1.29893e-09	up	yes	138.309	123.41	124.43	59.6796	57.9817	36.2047
ssc04064	Environmental Information Processing	Signal transduction	NF-kappa B signaling pathway	0.0159366	0.107782	ENSSSCG00000014369	CD14	0.373648	-1.42025	2.43896e-06	0.000354681	down	yes	2.57021	3.02635	4.03999	10.4672	9.46869	5.85457
ssc04064	Environmental Information Processing	Signal transduction	NF-kappa B signaling pathway	0.0159366	0.107782	ENSSSCG00000010504	BLNK	0.330236	-1.59843	1.05918e-05	0.00113509	down	yes	0.491579	0.242817	0.407969	1.48911	1.03319	0.936934
ssc04064	Environmental Information Processing	Signal transduction	NF-kappa B signaling pathway	0.0159366	0.107782	ENSSSCG00000038162	CCL21	0.170187	-2.55481	2.71717e-05	0.00232519	down	yes	1.08883	0.561409	0.467169	5.86505	5.62678	0.949821
ssc04064	Environmental Information Processing	Signal transduction	NF-kappa B signaling pathway	0.0159366	0.107782	ENSSSCG00000005503	TLR4	0.48183	-1.0534	4.41424e-05	0.00341945	down	yes	1.89913	1.43729	1.84978	4.41603	3.74549	2.60203
ssc04064	Environmental Information Processing	Signal transduction	NF-kappa B signaling pathway	0.0159366	0.107782	ENSSSCG00000039214	ENSSSCG00000039214	0.0285872	-5.12849	6.6841e-05	0.00472955	down	yes	0.071811	0	0	1.28911	1.08481	0.138086
ssc04064	Environmental Information Processing	Signal transduction	NF-kappa B signaling pathway	0.0159366	0.107782	ENSSSCG00000032343	CCL4	0.25394	-1.97744	0.000233644	0.0122413	down	yes	0.728731	1.46798	1.59811	7.38512	5.40678	2.15188
ssc04010	Environmental Information Processing	Signal transduction	MAPK signaling pathway	0.0173114	0.114078	ENSSSCG00000035249	GADD45G	2.50964	1.32748	1.97273e-12	1.29893e-09	up	yes	138.309	123.41	124.43	59.6796	57.9817	36.2047
ssc04010	Environmental Information Processing	Signal transduction	MAPK signaling pathway	0.0173114	0.114078	ENSSSCG00000014852	ARRB1	0.409585	-1.28776	4.25724e-10	1.73989e-07	down	yes	4.0559	2.85499	3.12716	9.11295	8.37177	7.02312
ssc04010	Environmental Information Processing	Signal transduction	MAPK signaling pathway	0.0173114	0.114078	ENSSSCG00000014441	CSF1R	0.267402	-1.90292	5.30672e-09	1.61802e-06	down	yes	12.3228	4.42678	8.77211	36.1176	33.7569	25.5687
ssc04010	Environmental Information Processing	Signal transduction	MAPK signaling pathway	0.0173114	0.114078	ENSSSCG00000003558	RPS6KA1	0.362549	-1.46375	7.4794e-09	2.11062e-06	down	yes	1.5968	0.916633	1.21914	3.78318	3.57171	2.9405
ssc04010	Environmental Information Processing	Signal transduction	MAPK signaling pathway	0.0173114	0.114078	ENSSSCG00000031912	JUN	2.12853	1.08985	7.09926e-07	0.000121065	up	yes	146.559	238.531	232.136	108.009	103.724	78.2458
ssc04010	Environmental Information Processing	Signal transduction	MAPK signaling pathway	0.0173114	0.114078	ENSSSCG00000014369	CD14	0.373648	-1.42025	2.43896e-06	0.000354681	down	yes	2.57021	3.02635	4.03999	10.4672	9.46869	5.85457
ssc04010	Environmental Information Processing	Signal transduction	MAPK signaling pathway	0.0173114	0.114078	ENSSSCG00000002960	RASGRP4	0.30911	-1.69381	1.28749e-05	0.00130421	down	yes	1.26098	0.591939	0.89653	3.87169	3.19924	1.82377
ssc04010	Environmental Information Processing	Signal transduction	MAPK signaling pathway	0.0173114	0.114078	ENSSSCG00000015850	DUSP4	2.69393	1.42971	2.17287e-05	0.00200411	up	yes	55.5694	33.2656	31.7937	9.59815	12.5691	22.6107
ssc04010	Environmental Information Processing	Signal transduction	MAPK signaling pathway	0.0173114	0.114078	ENSSSCG00000020705	MAP3K8	0.40704	-1.29676	5.52747e-05	0.00404874	down	yes	0.471917	0.291219	0.326944	0.984593	1.02612	0.667345
ssc04010	Environmental Information Processing	Signal transduction	MAPK signaling pathway	0.0173114	0.114078	ENSSSCG00000039214	ENSSSCG00000039214	0.0285872	-5.12849	6.6841e-05	0.00472955	down	yes	0.071811	0	0	1.28911	1.08481	0.138086
ssc04010	Environmental Information Processing	Signal transduction	MAPK signaling pathway	0.0173114	0.114078	ENSSSCG00000041764	CACNA1C	0.417116	-1.26148	0.000233939	0.0122413	down	yes	0.652194	0.690959	0.533839	1.75916	1.81219	0.928585
ssc04010	Environmental Information Processing	Signal transduction	MAPK signaling pathway	0.0173114	0.114078	ENSSSCG00000002383	FOS	2.65249	1.40735	0.000341806	0.0164344	up	yes	51.7257	134.672	160.001	61.4612	50.8367	18.2962
ssc04010	Environmental Information Processing	Signal transduction	MAPK signaling pathway	0.0173114	0.114078	ENSSSCG00000008090	IL1A	0.0874798	-3.51491	0.000343591	0.0164868	down	yes	0	0.138294	0.158153	1.4831	1.47258	0.433082
ssc04010	Environmental Information Processing	Signal transduction	MAPK signaling pathway	0.0173114	0.114078	ENSSSCG00000037669	PTPN7	0.368882	-1.43877	0.000540357	0.0225504	down	yes	0.688167	0.33705	0.624567	1.85735	1.68286	0.932181
ssc04940	Human Diseases	Endocrine and metabolic disease	Type I diabetes mellitus	0.0208917	0.134229	ENSSSCG00000052432	ENSSSCG00000052432	0.352776	-1.50318	6.48008e-07	0.000112119	down	yes	243.665	117.407	228.564	668.892	616.582	385.948
ssc04940	Human Diseases	Endocrine and metabolic disease	Type I diabetes mellitus	0.0208917	0.134229	ENSSSCG00000039214	ENSSSCG00000039214	0.0285872	-5.12849	6.6841e-05	0.00472955	down	yes	0.071811	0	0	1.28911	1.08481	0.138086
ssc04940	Human Diseases	Endocrine and metabolic disease	Type I diabetes mellitus	0.0208917	0.134229	ENSSSCG00000001229	ENSSSCG00000001229	0.42378	-1.23861	7.47488e-05	0.00511122	down	yes	92.9244	55.0207	64.4142	218.512	183.604	98.9914
ssc04940	Human Diseases	Endocrine and metabolic disease	Type I diabetes mellitus	0.0208917	0.134229	ENSSSCG00000008090	IL1A	0.0874798	-3.51491	0.000343591	0.0164868	down	yes	0	0.138294	0.158153	1.4831	1.47258	0.433082
ssc05135	Human Diseases	Infectious disease: bacterial	Yersinia infection	0.0221265	0.138695	ENSSSCG00000017142	BAIAP2	2.50395	1.32421	7.61515e-10	2.94528e-07	up	yes	4.73863	5.38765	5.54927	1.75594	2.01577	2.48862
ssc05135	Human Diseases	Infectious disease: bacterial	Yersinia infection	0.0221265	0.138695	ENSSSCG00000003558	RPS6KA1	0.362549	-1.46375	7.4794e-09	2.11062e-06	down	yes	1.5968	0.916633	1.21914	3.78318	3.57171	2.9405
ssc05135	Human Diseases	Infectious disease: bacterial	Yersinia infection	0.0221265	0.138695	ENSSSCG00000013553	VAV1	0.288444	-1.79363	3.42588e-08	8.28644e-06	down	yes	1.22791	0.625221	1.31869	4.30399	3.77463	2.91766
ssc05135	Human Diseases	Infectious disease: bacterial	Yersinia infection	0.0221265	0.138695	ENSSSCG00000031912	JUN	2.12853	1.08985	7.09926e-07	0.000121065	up	yes	146.559	238.531	232.136	108.009	103.724	78.2458
ssc05135	Human Diseases	Infectious disease: bacterial	Yersinia infection	0.0221265	0.138695	ENSSSCG00000005503	TLR4	0.48183	-1.0534	4.41424e-05	0.00341945	down	yes	1.89913	1.43729	1.84978	4.41603	3.74549	2.60203
ssc05135	Human Diseases	Infectious disease: bacterial	Yersinia infection	0.0221265	0.138695	ENSSSCG00000039214	ENSSSCG00000039214	0.0285872	-5.12849	6.6841e-05	0.00472955	down	yes	0.071811	0	0	1.28911	1.08481	0.138086
ssc05135	Human Diseases	Infectious disease: bacterial	Yersinia infection	0.0221265	0.138695	ENSSSCG00000017006	LCP2	0.344998	-1.53534	0.000108824	0.00682426	down	yes	1.09894	0.846338	1.38263	4.3203	3.84813	1.47774
ssc05135	Human Diseases	Infectious disease: bacterial	Yersinia infection	0.0221265	0.138695	ENSSSCG00000002383	FOS	2.65249	1.40735	0.000341806	0.0164344	up	yes	51.7257	134.672	160.001	61.4612	50.8367	18.2962
ssc05164	Human Diseases	Infectious disease: viral	Influenza A	0.0228615	0.13989	ENSSSCG00000009633	ENSSSCG00000009633	0.340632	-1.55371	4.99525e-10	2.00691e-07	down	yes	10.7651	11.8382	10.0347	39.7181	34.0498	22.0479
ssc05164	Human Diseases	Infectious disease: viral	Influenza A	0.0228615	0.13989	ENSSSCG00000000884	APAF1	0.352906	-1.50264	6.00109e-07	0.00010537	down	yes	5.15605	6.92886	7.05755	23.5103	19.6224	11.1096
ssc05164	Human Diseases	Infectious disease: viral	Influenza A	0.0228615	0.13989	ENSSSCG00000013784	DNAJB1	2.90086	1.53648	5.11153e-06	0.000634365	up	yes	21.5268	55.563	70.341	16.9963	16.5015	17.3254
ssc05164	Human Diseases	Infectious disease: viral	Influenza A	0.0228615	0.13989	ENSSSCG00000058071	ENSSSCG00000058071	0.305699	-1.70982	3.3132e-05	0.00274602	down	yes	3.6129	2.25998	5.42536	16.9983	14.0993	5.86118
ssc05164	Human Diseases	Infectious disease: viral	Influenza A	0.0228615	0.13989	ENSSSCG00000005503	TLR4	0.48183	-1.0534	4.41424e-05	0.00341945	down	yes	1.89913	1.43729	1.84978	4.41603	3.74549	2.60203
ssc05164	Human Diseases	Infectious disease: viral	Influenza A	0.0228615	0.13989	ENSSSCG00000035337	ENSSSCG00000035337	0.223822	-2.15958	5.01873e-05	0.00377663	down	yes	0.543315	2.28297	1.25438	5.12471	5.73226	7.37478
ssc05164	Human Diseases	Infectious disease: viral	Influenza A	0.0228615	0.13989	ENSSSCG00000039214	ENSSSCG00000039214	0.0285872	-5.12849	6.6841e-05	0.00472955	down	yes	0.071811	0	0	1.28911	1.08481	0.138086
ssc05164	Human Diseases	Infectious disease: viral	Influenza A	0.0228615	0.13989	ENSSSCG00000008090	IL1A	0.0874798	-3.51491	0.000343591	0.0164868	down	yes	0	0.138294	0.158153	1.4831	1.47258	0.433082
ssc05164	Human Diseases	Infectious disease: viral	Influenza A	0.0228615	0.13989	ENSSSCG00000036367	PABPN1L	2790.5	11.4463	0.00107157	0.0376304	up	yes	0.23516	0.407651	0.194338	0	0	0
ssc04911	Organismal Systems	Endocrine system	Insulin secretion	0.0250816	0.148692	ENSSSCG00000016672	ADCYAP1R1	0.327174	-1.61187	2.95446e-06	0.000417083	down	yes	3.85209	2.29967	6.26769	12.101	11.4899	14.3689
ssc04911	Organismal Systems	Endocrine system	Insulin secretion	0.0250816	0.148692	ENSSSCG00000006391	ATP1A2	0.41596	-1.26548	1.27357e-05	0.00129875	down	yes	0.720325	0.890562	0.655964	2.03469	1.67091	1.74409
ssc04911	Organismal Systems	Endocrine system	Insulin secretion	0.0250816	0.148692	ENSSSCG00000017951	ATP1B2	0.45804	-1.12646	5.14125e-05	0.00384442	down	yes	2.02642	1.5372	1.39938	3.37284	3.7959	3.66657
ssc04911	Organismal Systems	Endocrine system	Insulin secretion	0.0250816	0.148692	ENSSSCG00000039535	CAMK2B	0.0501412	-4.31786	0.00011841	0.0073067	down	yes	0.0813007	0	0.049531	1.51878	1.04571	0.0447753
ssc04911	Organismal Systems	Endocrine system	Insulin secretion	0.0250816	0.148692	ENSSSCG00000041764	CACNA1C	0.417116	-1.26148	0.000233939	0.0122413	down	yes	0.652194	0.690959	0.533839	1.75916	1.81219	0.928585
ssc04911	Organismal Systems	Endocrine system	Insulin secretion	0.0250816	0.148692	ENSSSCG00000003069	KCNN4	0.0418916	-4.57719	0.000784314	0.0295571	down	yes	0	0.0479259	0	0.24044	0.190336	0.713268
ssc04024	Environmental Information Processing	Signal transduction	cAMP signaling pathway	0.0254569	0.148692	ENSSSCG00000013553	VAV1	0.288444	-1.79363	3.42588e-08	8.28644e-06	down	yes	1.22791	0.625221	1.31869	4.30399	3.77463	2.91766
ssc04024	Environmental Information Processing	Signal transduction	cAMP signaling pathway	0.0254569	0.148692	ENSSSCG00000031912	JUN	2.12853	1.08985	7.09926e-07	0.000121065	up	yes	146.559	238.531	232.136	108.009	103.724	78.2458
ssc04024	Environmental Information Processing	Signal transduction	cAMP signaling pathway	0.0254569	0.148692	ENSSSCG00000016672	ADCYAP1R1	0.327174	-1.61187	2.95446e-06	0.000417083	down	yes	3.85209	2.29967	6.26769	12.101	11.4899	14.3689
ssc04024	Environmental Information Processing	Signal transduction	cAMP signaling pathway	0.0254569	0.148692	ENSSSCG00000005400	GRIN3A	3.07562	1.62088	7.19319e-06	0.000831617	up	yes	0.886578	0.630603	1.09641	0.319999	0.172159	0.357617
ssc04024	Environmental Information Processing	Signal transduction	cAMP signaling pathway	0.0254569	0.148692	ENSSSCG00000006391	ATP1A2	0.41596	-1.26548	1.27357e-05	0.00129875	down	yes	0.720325	0.890562	0.655964	2.03469	1.67091	1.74409
ssc04024	Environmental Information Processing	Signal transduction	cAMP signaling pathway	0.0254569	0.148692	ENSSSCG00000009031	EDNRA	0.493443	-1.01905	2.44207e-05	0.00218858	down	yes	4.47861	3.09206	4.08091	9.60955	7.74763	6.25565
ssc04024	Environmental Information Processing	Signal transduction	cAMP signaling pathway	0.0254569	0.148692	ENSSSCG00000017951	ATP1B2	0.45804	-1.12646	5.14125e-05	0.00384442	down	yes	2.02642	1.5372	1.39938	3.37284	3.7959	3.66657
ssc04024	Environmental Information Processing	Signal transduction	cAMP signaling pathway	0.0254569	0.148692	ENSSSCG00000039535	CAMK2B	0.0501412	-4.31786	0.00011841	0.0073067	down	yes	0.0813007	0	0.049531	1.51878	1.04571	0.0447753
ssc04024	Environmental Information Processing	Signal transduction	cAMP signaling pathway	0.0254569	0.148692	ENSSSCG00000041764	CACNA1C	0.417116	-1.26148	0.000233939	0.0122413	down	yes	0.652194	0.690959	0.533839	1.75916	1.81219	0.928585
ssc04024	Environmental Information Processing	Signal transduction	cAMP signaling pathway	0.0254569	0.148692	ENSSSCG00000016403	VIPR2	0.275852	-1.85804	0.000272032	0.0136315	down	yes	0.626636	0.469111	0.320255	2.30952	2.08446	0.739222
ssc04024	Environmental Information Processing	Signal transduction	cAMP signaling pathway	0.0254569	0.148692	ENSSSCG00000002383	FOS	2.65249	1.40735	0.000341806	0.0164344	up	yes	51.7257	134.672	160.001	61.4612	50.8367	18.2962
ssc04970	Organismal Systems	Digestive system	Salivary secretion	0.0263879	0.150704	ENSSSCG00000000492	LYZ	0.13328	-2.90747	3.96015e-14	4.26688e-11	down	yes	1.60993	4.55858	4.36001	27.5605	25.4903	25.9446
ssc04970	Organismal Systems	Digestive system	Salivary secretion	0.0263879	0.150704	ENSSSCG00000037360	CST3	0.451307	-1.14782	1.60503e-06	0.000251958	down	yes	330.513	239.352	337.062	796.089	734.126	479.341
ssc04970	Organismal Systems	Digestive system	Salivary secretion	0.0263879	0.150704	ENSSSCG00000006391	ATP1A2	0.41596	-1.26548	1.27357e-05	0.00129875	down	yes	0.720325	0.890562	0.655964	2.03469	1.67091	1.74409
ssc04970	Organismal Systems	Digestive system	Salivary secretion	0.0263879	0.150704	ENSSSCG00000017951	ATP1B2	0.45804	-1.12646	5.14125e-05	0.00384442	down	yes	2.02642	1.5372	1.39938	3.37284	3.7959	3.66657
ssc04970	Organismal Systems	Digestive system	Salivary secretion	0.0263879	0.150704	ENSSSCG00000036331	ENSSSCG00000036331	0.257215	-1.95895	0.000574682	0.0236909	down	yes	1.63153	0.381728	1.8181	7.97764	4.44577	2.47214
ssc04970	Organismal Systems	Digestive system	Salivary secretion	0.0263879	0.150704	ENSSSCG00000003069	KCNN4	0.0418916	-4.57719	0.000784314	0.0295571	down	yes	0	0.0479259	0	0.24044	0.190336	0.713268
ssc04210	Cellular Processes	Cell growth and death	Apoptosis	0.0280607	0.156774	ENSSSCG00000006648	CTSS	0.370464	-1.4326	1.14189e-18	3.86676e-15	down	yes	18.1443	14.7939	17.6091	47.4559	45.3548	43.6326
ssc04210	Cellular Processes	Cell growth and death	Apoptosis	0.0280607	0.156774	ENSSSCG00000035249	GADD45G	2.50964	1.32748	1.97273e-12	1.29893e-09	up	yes	138.309	123.41	124.43	59.6796	57.9817	36.2047
ssc04210	Cellular Processes	Cell growth and death	Apoptosis	0.0280607	0.156774	ENSSSCG00000009633	ENSSSCG00000009633	0.340632	-1.55371	4.99525e-10	2.00691e-07	down	yes	10.7651	11.8382	10.0347	39.7181	34.0498	22.0479
ssc04210	Cellular Processes	Cell growth and death	Apoptosis	0.0280607	0.156774	ENSSSCG00000000884	APAF1	0.352906	-1.50264	6.00109e-07	0.00010537	down	yes	5.15605	6.92886	7.05755	23.5103	19.6224	11.1096
ssc04210	Cellular Processes	Cell growth and death	Apoptosis	0.0280607	0.156774	ENSSSCG00000031912	JUN	2.12853	1.08985	7.09926e-07	0.000121065	up	yes	146.559	238.531	232.136	108.009	103.724	78.2458
ssc04210	Cellular Processes	Cell growth and death	Apoptosis	0.0280607	0.156774	ENSSSCG00000000136	CSF2RB	0.259822	-1.9444	1.87754e-05	0.00176608	down	yes	0.974381	0.346324	0.321221	2.61115	2.19017	1.5181
ssc04210	Cellular Processes	Cell growth and death	Apoptosis	0.0280607	0.156774	ENSSSCG00000058071	ENSSSCG00000058071	0.305699	-1.70982	3.3132e-05	0.00274602	down	yes	3.6129	2.25998	5.42536	16.9983	14.0993	5.86118
ssc04210	Cellular Processes	Cell growth and death	Apoptosis	0.0280607	0.156774	ENSSSCG00000002383	FOS	2.65249	1.40735	0.000341806	0.0164344	up	yes	51.7257	134.672	160.001	61.4612	50.8367	18.2962
ssc04151	Environmental Information Processing	Signal transduction	PI3K-Akt signaling pathway	0.0313418	0.171379	ENSSSCG00000025795	CSF3R	0.0895656	-3.48091	1.83938e-18	5.45008e-15	down	yes	0.208293	0.260524	0.293348	2.10886	2.55495	3.84578
ssc04151	Environmental Information Processing	Signal transduction	PI3K-Akt signaling pathway	0.0313418	0.171379	ENSSSCG00000009216	SPP1	0.137138	-2.8663	6.63822e-16	1.2104e-12	down	yes	9.85735	26.3966	17.2624	122.618	126.493	141.128
ssc04151	Environmental Information Processing	Signal transduction	PI3K-Akt signaling pathway	0.0313418	0.171379	ENSSSCG00000009002	TLR2	0.261758	-1.9337	1.45329e-12	9.84254e-10	down	yes	0.242131	0.198378	0.235175	0.963629	0.920697	0.697003
ssc04151	Environmental Information Processing	Signal transduction	PI3K-Akt signaling pathway	0.0313418	0.171379	ENSSSCG00000012397	IL2RG	0.298773	-1.74288	1.05221e-11	5.80037e-09	down	yes	4.1612	2.96118	4.3484	15.2717	12.9891	10.1322
ssc04151	Environmental Information Processing	Signal transduction	PI3K-Akt signaling pathway	0.0313418	0.171379	ENSSSCG00000014441	CSF1R	0.267402	-1.90292	5.30672e-09	1.61802e-06	down	yes	12.3228	4.42678	8.77211	36.1176	33.7569	25.5687
ssc04151	Environmental Information Processing	Signal transduction	PI3K-Akt signaling pathway	0.0313418	0.171379	ENSSSCG00000010509	PIK3AP1	0.398756	-1.32642	2.83488e-06	0.000404808	down	yes	1.20375	0.696687	0.988776	2.30318	2.72542	2.21698
ssc04151	Environmental Information Processing	Signal transduction	PI3K-Akt signaling pathway	0.0313418	0.171379	ENSSSCG00000038694	CCND2	2.82238	1.49691	3.51989e-06	0.000482286	up	yes	2.2395	2.26468	1.56766	0.690152	0.583219	0.877948
ssc04151	Environmental Information Processing	Signal transduction	PI3K-Akt signaling pathway	0.0313418	0.171379	ENSSSCG00000004167	MYB	0.000641893	-10.6054	6.72547e-06	0.000789211	down	yes	0	0	0	0.118726	0.287274	0.0613681
ssc04151	Environmental Information Processing	Signal transduction	PI3K-Akt signaling pathway	0.0313418	0.171379	ENSSSCG00000017991	PIK3R5	0.434454	-1.20272	1.8338e-05	0.00173181	down	yes	1.1792	0.846518	1.06752	2.17675	2.86488	2.07819
ssc04151	Environmental Information Processing	Signal transduction	PI3K-Akt signaling pathway	0.0313418	0.171379	ENSSSCG00000015556	LAMC2	0.383146	-1.38403	2.49125e-05	0.00220345	down	yes	4.45587	5.68009	5.54977	17.6243	15.8388	7.47622
ssc04151	Environmental Information Processing	Signal transduction	PI3K-Akt signaling pathway	0.0313418	0.171379	ENSSSCG00000005503	TLR4	0.48183	-1.0534	4.41424e-05	0.00341945	down	yes	1.89913	1.43729	1.84978	4.41603	3.74549	2.60203
ssc04151	Environmental Information Processing	Signal transduction	PI3K-Akt signaling pathway	0.0313418	0.171379	ENSSSCG00000016450	NOS3	0.432766	-1.20834	0.000155416	0.00902937	down	yes	19.8828	15.445	15.7595	51.4707	45.3423	21.2353
ssc04151	Environmental Information Processing	Signal transduction	PI3K-Akt signaling pathway	0.0313418	0.171379	ENSSSCG00000034767	LAMA1	10.9754	3.4562	0.000363827	0.0170438	up	yes	0.069928	0.115821	0.066322	0.010591	0.012376	0
ssc04151	Environmental Information Processing	Signal transduction	PI3K-Akt signaling pathway	0.0313418	0.171379	ENSSSCG00000006095	CCNE2	0.430658	-1.21539	0.000745772	0.0287444	down	yes	1.26223	1.7483	2.01328	4.72691	4.49502	2.4435
ssc04151	Environmental Information Processing	Signal transduction	PI3K-Akt signaling pathway	0.0313418	0.171379	ENSSSCG00000063008	ITGA2B	0.325185	-1.62067	0.00150106	0.0486746	down	yes	1.49931	0.648918	1.18789	4.51148	4.56509	1.18256
ssc04973	Organismal Systems	Digestive system	Carbohydrate digestion and absorption	0.035363	0.18934	ENSSSCG00000006391	ATP1A2	0.41596	-1.26548	1.27357e-05	0.00129875	down	yes	0.720325	0.890562	0.655964	2.03469	1.67091	1.74409
ssc04973	Organismal Systems	Digestive system	Carbohydrate digestion and absorption	0.035363	0.18934	ENSSSCG00000017951	ATP1B2	0.45804	-1.12646	5.14125e-05	0.00384442	down	yes	2.02642	1.5372	1.39938	3.37284	3.7959	3.66657
ssc04973	Organismal Systems	Digestive system	Carbohydrate digestion and absorption	0.035363	0.18934	ENSSSCG00000036331	ENSSSCG00000036331	0.257215	-1.95895	0.000574682	0.0236909	down	yes	1.63153	0.381728	1.8181	7.97764	4.44577	2.47214
ssc04973	Organismal Systems	Digestive system	Carbohydrate digestion and absorption	0.035363	0.18934	ENSSSCG00000014048	HK3	0.44934	-1.15412	0.00117174	0.0400821	down	yes	3.2522	2.97804	4.95353	10.3246	9.83361	4.73113
ssc04979	Organismal Systems	Digestive system	Cholesterol metabolism	0.0378042	0.198279	ENSSSCG00000005423	ABCA1	0.362746	-1.46297	5.17091e-15	7.6607e-12	down	yes	2.2119	1.97877	1.8457	6.26204	5.26821	5.1105
ssc04979	Organismal Systems	Digestive system	Cholesterol metabolism	0.0378042	0.198279	ENSSSCG00000015405	ENSSSCG00000015405	0.285037	-1.81078	4.64856e-09	1.46919e-06	down	yes	2.24569	1.27234	1.56819	6.5817	6.48757	4.7748
ssc04979	Organismal Systems	Digestive system	Cholesterol metabolism	0.0378042	0.198279	ENSSSCG00000007435	ENSSSCG00000007435	0.405601	-1.30187	3.67711e-07	6.89183e-05	down	yes	6.67754	5.05375	5.27362	16.9901	14.758	10.1771
ssc04979	Organismal Systems	Digestive system	Cholesterol metabolism	0.0378042	0.198279	ENSSSCG00000025020	PCSK9	0.177446	-2.49455	1.31625e-06	0.000210813	down	yes	0.0657781	0.1253	0.113568	0.624888	0.641092	0.450864
ssc04020	Environmental Information Processing	Signal transduction	Calcium signaling pathway	0.0423371	0.216537	ENSSSCG00000017755	NOS2	0.297181	-1.75059	1.84656e-07	3.90812e-05	down	yes	2.46124	2.02222	2.07884	9.86271	8.36997	3.84918
ssc04020	Environmental Information Processing	Signal transduction	Calcium signaling pathway	0.0423371	0.216537	ENSSSCG00000009031	EDNRA	0.493443	-1.01905	2.44207e-05	0.00218858	down	yes	4.47861	3.09206	4.08091	9.60955	7.74763	6.25565
ssc04020	Environmental Information Processing	Signal transduction	Calcium signaling pathway	0.0423371	0.216537	ENSSSCG00000031788	PTAFR	0.337606	-1.56659	5.3237e-05	0.00394353	down	yes	0.936501	0.692327	0.661848	3.30841	2.16544	1.31122
ssc04020	Environmental Information Processing	Signal transduction	Calcium signaling pathway	0.0423371	0.216537	ENSSSCG00000039416	CXCR4	0.353752	-1.49919	8.43721e-05	0.00557091	down	yes	2.88652	1.8953	2.56487	9.5084	7.60031	3.65923
ssc04020	Environmental Information Processing	Signal transduction	Calcium signaling pathway	0.0423371	0.216537	ENSSSCG00000039535	CAMK2B	0.0501412	-4.31786	0.00011841	0.0073067	down	yes	0.0813007	0	0.049531	1.51878	1.04571	0.0447753
ssc04020	Environmental Information Processing	Signal transduction	Calcium signaling pathway	0.0423371	0.216537	ENSSSCG00000016450	NOS3	0.432766	-1.20834	0.000155416	0.00902937	down	yes	19.8828	15.445	15.7595	51.4707	45.3423	21.2353
ssc04020	Environmental Information Processing	Signal transduction	Calcium signaling pathway	0.0423371	0.216537	ENSSSCG00000010101	P2RX6	0.427115	-1.2273	0.000160802	0.00927412	down	yes	4.43037	2.34832	5.7121	10.4058	10.4366	8.40212
ssc04020	Environmental Information Processing	Signal transduction	Calcium signaling pathway	0.0423371	0.216537	ENSSSCG00000041764	CACNA1C	0.417116	-1.26148	0.000233939	0.0122413	down	yes	0.652194	0.690959	0.533839	1.75916	1.81219	0.928585
ssc04020	Environmental Information Processing	Signal transduction	Calcium signaling pathway	0.0423371	0.216537	ENSSSCG00000007424	TNNC2	0.232153	-2.10685	0.00027139	0.0136293	down	yes	0.30774	0.255159	0.132618	0.852457	0.90906	1.23443
ssc04020	Environmental Information Processing	Signal transduction	Calcium signaling pathway	0.0423371	0.216537	ENSSSCG00000009160	TACR3	0.00149172	-9.38881	0.000391678	0.0180278	down	yes	0	0	0	0.045813	0.120102	0.035195
ssc04020	Environmental Information Processing	Signal transduction	Calcium signaling pathway	0.0423371	0.216537	ENSSSCG00000058790	RYR1	0.0971762	-3.36325	0.000776237	0.0294871	down	yes	0.00557775	0	0.0358295	0.155492	0.194144	0.0764682
ssc00330	Metabolism	Amino acid metabolism	Arginine and proline metabolism	0.0429703	0.216537	ENSSSCG00000017755	NOS2	0.297181	-1.75059	1.84656e-07	3.90812e-05	down	yes	2.46124	2.02222	2.07884	9.86271	8.36997	3.84918
ssc00330	Metabolism	Amino acid metabolism	Arginine and proline metabolism	0.0429703	0.216537	ENSSSCG00000027121	ODC1	0.433876	-1.20464	2.66331e-05	0.00229568	down	yes	4.39082	4.69997	4.67224	13.5644	11.1915	6.96526
ssc00330	Metabolism	Amino acid metabolism	Arginine and proline metabolism	0.0429703	0.216537	ENSSSCG00000036132	CKM	0.242785	-2.04225	0.000108336	0.00681164	down	yes	0.397174	0.200551	0.201502	0.70483	0.958889	1.62819
ssc00330	Metabolism	Amino acid metabolism	Arginine and proline metabolism	0.0429703	0.216537	ENSSSCG00000016450	NOS3	0.432766	-1.20834	0.000155416	0.00902937	down	yes	19.8828	15.445	15.7595	51.4707	45.3423	21.2353
ssc05322	Human Diseases	Immune disease	Systemic lupus erythematosus	0.0475806	0.230721	ENSSSCG00000013551	C3	0.273533	-1.87021	4.05676e-13	3.19253e-10	down	yes	1.3987	1.41272	1.78552	4.82431	5.37869	6.60276
ssc05322	Human Diseases	Immune disease	Systemic lupus erythematosus	0.0475806	0.230721	ENSSSCG00000033512	C1QB	0.26517	-1.91501	4.73731e-06	0.00061029	down	yes	10.4582	3.23701	10.7569	39.6548	34.5555	18.0026
ssc05322	Human Diseases	Immune disease	Systemic lupus erythematosus	0.0475806	0.230721	ENSSSCG00000038706	C1QC	0.258447	-1.95206	7.68691e-06	0.000876807	down	yes	22.6937	5.30699	16.674	71.3082	65.8292	35.7209
ssc05322	Human Diseases	Immune disease	Systemic lupus erythematosus	0.0475806	0.230721	ENSSSCG00000016856	C9	0.46333	-1.10989	1.55398e-05	0.00152213	down	yes	14.5487	9.88828	8.37926	25.4552	24.1392	21.2326
ssc05322	Human Diseases	Immune disease	Systemic lupus erythematosus	0.0475806	0.230721	ENSSSCG00000003524	C1QA	0.251856	-1.98933	3.82937e-05	0.00308746	down	yes	12.7526	3.09395	14.2621	53.4073	45.0747	21.0653
ssc05322	Human Diseases	Immune disease	Systemic lupus erythematosus	0.0475806	0.230721	ENSSSCG00000001427	C4A	0.426905	-1.22801	0.00154184	0.0492557	down	yes	10.1454	6.08694	11.4747	30.1364	24.6872	10.0787
ssc04660	Organismal Systems	Immune system	T cell receptor signaling pathway	0.0475806	0.230721	ENSSSCG00000013553	VAV1	0.288444	-1.79363	3.42588e-08	8.28644e-06	down	yes	1.22791	0.625221	1.31869	4.30399	3.77463	2.91766
ssc04660	Organismal Systems	Immune system	T cell receptor signaling pathway	0.0475806	0.230721	ENSSSCG00000031912	JUN	2.12853	1.08985	7.09926e-07	0.000121065	up	yes	146.559	238.531	232.136	108.009	103.724	78.2458
ssc04660	Organismal Systems	Immune system	T cell receptor signaling pathway	0.0475806	0.230721	ENSSSCG00000020705	MAP3K8	0.40704	-1.29676	5.52747e-05	0.00404874	down	yes	0.471917	0.291219	0.326944	0.984593	1.02612	0.667345
ssc04660	Organismal Systems	Immune system	T cell receptor signaling pathway	0.0475806	0.230721	ENSSSCG00000017006	LCP2	0.344998	-1.53534	0.000108824	0.00682426	down	yes	1.09894	0.846338	1.38263	4.3203	3.84813	1.47774
ssc04660	Organismal Systems	Immune system	T cell receptor signaling pathway	0.0475806	0.230721	ENSSSCG00000002383	FOS	2.65249	1.40735	0.000341806	0.0164344	up	yes	51.7257	134.672	160.001	61.4612	50.8367	18.2962
ssc04660	Organismal Systems	Immune system	T cell receptor signaling pathway	0.0475806	0.230721	ENSSSCG00000016122	CTLA4	0.000568433	-10.7807	0.000522909	0.0219663	down	yes	0	0	0	0.313975	0.140938	0.072854
ssc04612	Organismal Systems	Immune system	Antigen processing and presentation	0.0514281	0.237801	ENSSSCG00000006648	CTSS	0.370464	-1.4326	1.14189e-18	3.86676e-15	down	yes	18.1443	14.7939	17.6091	47.4559	45.3548	43.6326
ssc04612	Organismal Systems	Immune system	Antigen processing and presentation	0.0514281	0.237801	ENSSSCG00000013901	IFI30	0.354033	-1.49804	6.35741e-07	0.000110806	down	yes	15.2366	11.1709	20.2238	52.7429	49.8898	29.0816
ssc04612	Organismal Systems	Immune system	Antigen processing and presentation	0.0514281	0.237801	ENSSSCG00000052432	ENSSSCG00000052432	0.352776	-1.50318	6.48008e-07	0.000112119	down	yes	243.665	117.407	228.564	668.892	616.582	385.948
ssc04612	Organismal Systems	Immune system	Antigen processing and presentation	0.0514281	0.237801	ENSSSCG00000001229	ENSSSCG00000001229	0.42378	-1.23861	7.47488e-05	0.00511122	down	yes	92.9244	55.0207	64.4142	218.512	183.604	98.9914
ssc04659	Organismal Systems	Immune system	Th17 cell differentiation	0.0515642	0.237801	ENSSSCG00000012397	IL2RG	0.298773	-1.74288	1.05221e-11	5.80037e-09	down	yes	4.1612	2.96118	4.3484	15.2717	12.9891	10.1322
ssc04659	Organismal Systems	Immune system	Th17 cell differentiation	0.0515642	0.237801	ENSSSCG00000031912	JUN	2.12853	1.08985	7.09926e-07	0.000121065	up	yes	146.559	238.531	232.136	108.009	103.724	78.2458
ssc04659	Organismal Systems	Immune system	Th17 cell differentiation	0.0515642	0.237801	ENSSSCG00000039214	ENSSSCG00000039214	0.0285872	-5.12849	6.6841e-05	0.00472955	down	yes	0.071811	0	0	1.28911	1.08481	0.138086
ssc04659	Organismal Systems	Immune system	Th17 cell differentiation	0.0515642	0.237801	ENSSSCG00000002383	FOS	2.65249	1.40735	0.000341806	0.0164344	up	yes	51.7257	134.672	160.001	61.4612	50.8367	18.2962
ssc04659	Organismal Systems	Immune system	Th17 cell differentiation	0.0515642	0.237801	ENSSSCG00000033381	IRF4	0.232937	-2.10199	0.000794136	0.0297851	down	yes	0.20324	0.077515	0.122345	0.718254	0.77372	0.238537
ssc04659	Organismal Systems	Immune system	Th17 cell differentiation	0.0515642	0.237801	ENSSSCG00000035537	RUNX1	0.47027	-1.08844	0.00118562	0.0404374	down	yes	0.761275	0.845569	0.951095	2.4498	1.82238	1.16712
ssc04310	Environmental Information Processing	Signal transduction	Wnt signaling pathway	0.0522447	0.237801	ENSSSCG00000035524	WNT9B	0.0878802	-3.50832	1.07095e-20	5.07714e-17	down	yes	0.08171	0.088024	0.11439	1.22233	0.961308	1.04944
ssc04310	Environmental Information Processing	Signal transduction	Wnt signaling pathway	0.0522447	0.237801	ENSSSCG00000031912	JUN	2.12853	1.08985	7.09926e-07	0.000121065	up	yes	146.559	238.531	232.136	108.009	103.724	78.2458
ssc04310	Environmental Information Processing	Signal transduction	Wnt signaling pathway	0.0522447	0.237801	ENSSSCG00000001595	DAAM2	0.495645	-1.01262	7.21679e-07	0.00012219	down	yes	8.80438	6.83415	6.4404	15.7044	14.5905	14.251
ssc04310	Environmental Information Processing	Signal transduction	Wnt signaling pathway	0.0522447	0.237801	ENSSSCG00000038694	CCND2	2.82238	1.49691	3.51989e-06	0.000482286	up	yes	2.2395	2.26468	1.56766	0.690152	0.583219	0.877948
ssc04310	Environmental Information Processing	Signal transduction	Wnt signaling pathway	0.0522447	0.237801	ENSSSCG00000004218	RSPO3	0.435278	-1.19999	4.4904e-05	0.00345586	down	yes	2.58309	2.00955	2.02928	6.3661	5.22525	3.62173
ssc04310	Environmental Information Processing	Signal transduction	Wnt signaling pathway	0.0522447	0.237801	ENSSSCG00000025822	SFRP1	0.440591	-1.18249	5.47263e-05	0.00402867	down	yes	53.7017	62.2228	69.0769	177.636	158.146	84.1112
ssc04310	Environmental Information Processing	Signal transduction	Wnt signaling pathway	0.0522447	0.237801	ENSSSCG00000039535	CAMK2B	0.0501412	-4.31786	0.00011841	0.0073067	down	yes	0.0813007	0	0.049531	1.51878	1.04571	0.0447753
ssc04310	Environmental Information Processing	Signal transduction	Wnt signaling pathway	0.0522447	0.237801	ENSSSCG00000032094	DKK2	0.416099	-1.265	0.000323186	0.0155707	down	yes	2.59426	1.71149	4.33831	8.39117	6.32682	6.05608
ssc03320	Organismal Systems	Endocrine system	PPAR signaling pathway	0.0533027	0.237801	ENSSSCG00000012880	CPT1A	0.328307	-1.60688	3.77987e-10	1.59997e-07	down	yes	6.63109	5.29289	6.21136	23.2543	20.0516	11.9332
ssc03320	Organismal Systems	Endocrine system	PPAR signaling pathway	0.0533027	0.237801	ENSSSCG00000015405	ENSSSCG00000015405	0.285037	-1.81078	4.64856e-09	1.46919e-06	down	yes	2.24569	1.27234	1.56819	6.5817	6.48757	4.7748
ssc03320	Organismal Systems	Endocrine system	PPAR signaling pathway	0.0533027	0.237801	ENSSSCG00000007435	ENSSSCG00000007435	0.405601	-1.30187	3.67711e-07	6.89183e-05	down	yes	6.67754	5.05375	5.27362	16.9901	14.758	10.1771
ssc03320	Organismal Systems	Endocrine system	PPAR signaling pathway	0.0533027	0.237801	ENSSSCG00000000647	OLR1	0.380023	-1.39584	7.14491e-06	0.000830211	down	yes	1.69826	1.9816	1.29141	5.10255	4.4909	3.48806
ssc03320	Organismal Systems	Endocrine system	PPAR signaling pathway	0.0533027	0.237801	ENSSSCG00000009245	SCD5	0.410423	-1.28482	8.84037e-06	0.000979215	down	yes	1.22876	1.08594	0.982728	2.97511	2.62671	2.4324
ssc04728	Organismal Systems	Nervous system	Dopaminergic synapse	0.0536671	0.237801	ENSSSCG00000014852	ARRB1	0.409585	-1.28776	4.25724e-10	1.73989e-07	down	yes	4.0559	2.85499	3.12716	9.11295	8.37177	7.02312
ssc04728	Organismal Systems	Nervous system	Dopaminergic synapse	0.0536671	0.237801	ENSSSCG00000013397	ARNTL	0.32737	-1.61101	4.90507e-06	0.000620432	down	yes	1.31697	1.18144	0.983143	2.98129	2.84111	4.81252
ssc04728	Organismal Systems	Nervous system	Dopaminergic synapse	0.0536671	0.237801	ENSSSCG00000010132	COMT	2.20222	1.13896	7.20871e-05	0.00501101	up	yes	59.7623	101.275	56.0842	26.5459	29.9137	42.1329
ssc04728	Organismal Systems	Nervous system	Dopaminergic synapse	0.0536671	0.237801	ENSSSCG00000039535	CAMK2B	0.0501412	-4.31786	0.00011841	0.0073067	down	yes	0.0813007	0	0.049531	1.51878	1.04571	0.0447753
ssc04728	Organismal Systems	Nervous system	Dopaminergic synapse	0.0536671	0.237801	ENSSSCG00000041764	CACNA1C	0.417116	-1.26148	0.000233939	0.0122413	down	yes	0.652194	0.690959	0.533839	1.75916	1.81219	0.928585
ssc04728	Organismal Systems	Nervous system	Dopaminergic synapse	0.0536671	0.237801	ENSSSCG00000002383	FOS	2.65249	1.40735	0.000341806	0.0164344	up	yes	51.7257	134.672	160.001	61.4612	50.8367	18.2962
ssc04728	Organismal Systems	Nervous system	Dopaminergic synapse	0.0536671	0.237801	ENSSSCG00000009601	SLC18A1	0.126732	-2.98014	0.000345946	0.0165372	down	yes	0.294342	0.035834	0.026567	1.09263	1.22866	0.493638
ssc05166	Human Diseases	Infectious disease: viral	Human T-cell leukemia virus 1 infection	0.0555688	0.24002	ENSSSCG00000012397	IL2RG	0.298773	-1.74288	1.05221e-11	5.80037e-09	down	yes	4.1612	2.96118	4.3484	15.2717	12.9891	10.1322
ssc05166	Human Diseases	Infectious disease: viral	Human T-cell leukemia virus 1 infection	0.0555688	0.24002	ENSSSCG00000025133	ITGB2	0.381078	-1.39184	2.91286e-07	5.70633e-05	down	yes	2.92941	1.79459	2.96807	5.92198	6.52439	7.73865
ssc05166	Human Diseases	Infectious disease: viral	Human T-cell leukemia virus 1 infection	0.0555688	0.24002	ENSSSCG00000013237	SPI1	0.398203	-1.32842	4.06709e-07	7.41587e-05	down	yes	11.5438	7.67205	9.23279	28.2218	26.2191	17.0016
ssc05166	Human Diseases	Infectious disease: viral	Human T-cell leukemia virus 1 infection	0.0555688	0.24002	ENSSSCG00000052432	ENSSSCG00000052432	0.352776	-1.50318	6.48008e-07	0.000112119	down	yes	243.665	117.407	228.564	668.892	616.582	385.948
ssc05166	Human Diseases	Infectious disease: viral	Human T-cell leukemia virus 1 infection	0.0555688	0.24002	ENSSSCG00000031912	JUN	2.12853	1.08985	7.09926e-07	0.000121065	up	yes	146.559	238.531	232.136	108.009	103.724	78.2458
ssc05166	Human Diseases	Infectious disease: viral	Human T-cell leukemia virus 1 infection	0.0555688	0.24002	ENSSSCG00000038694	CCND2	2.82238	1.49691	3.51989e-06	0.000482286	up	yes	2.2395	2.26468	1.56766	0.690152	0.583219	0.877948
ssc05166	Human Diseases	Infectious disease: viral	Human T-cell leukemia virus 1 infection	0.0555688	0.24002	ENSSSCG00000001229	ENSSSCG00000001229	0.42378	-1.23861	7.47488e-05	0.00511122	down	yes	92.9244	55.0207	64.4142	218.512	183.604	98.9914
ssc05166	Human Diseases	Infectious disease: viral	Human T-cell leukemia virus 1 infection	0.0555688	0.24002	ENSSSCG00000028056	ZFP36	2.01672	1.01201	0.00015434	0.00900394	up	yes	103.81	216.363	207.51	100.22	96.6212	64.8132
ssc05166	Human Diseases	Infectious disease: viral	Human T-cell leukemia virus 1 infection	0.0555688	0.24002	ENSSSCG00000002383	FOS	2.65249	1.40735	0.000341806	0.0164344	up	yes	51.7257	134.672	160.001	61.4612	50.8367	18.2962
ssc05166	Human Diseases	Infectious disease: viral	Human T-cell leukemia virus 1 infection	0.0555688	0.24002	ENSSSCG00000006095	CCNE2	0.430658	-1.21539	0.000745772	0.0287444	down	yes	1.26223	1.7483	2.01328	4.72691	4.49502	2.4435
ssc05203	Human Diseases	Cancer: overview	Viral carcinogenesis	0.0560358	0.24002	ENSSSCG00000013551	C3	0.273533	-1.87021	4.05676e-13	3.19253e-10	down	yes	1.3987	1.41272	1.78552	4.82431	5.37869	6.60276
ssc05203	Human Diseases	Cancer: overview	Viral carcinogenesis	0.0560358	0.24002	ENSSSCG00000015353	SCIN	0.15089	-2.72844	1.58808e-11	8.3653e-09	down	yes	0.446263	1.31069	0.932717	5.81159	5.4549	6.55893
ssc05203	Human Diseases	Cancer: overview	Viral carcinogenesis	0.0560358	0.24002	ENSSSCG00000024311	CCR2	0.108001	-3.21089	1.93508e-11	9.75939e-09	down	yes	0.211259	0.0428126	0.117214	1.46904	1.10976	0.859002
ssc05203	Human Diseases	Cancer: overview	Viral carcinogenesis	0.0560358	0.24002	ENSSSCG00000052432	ENSSSCG00000052432	0.352776	-1.50318	6.48008e-07	0.000112119	down	yes	243.665	117.407	228.564	668.892	616.582	385.948
ssc05203	Human Diseases	Cancer: overview	Viral carcinogenesis	0.0560358	0.24002	ENSSSCG00000031912	JUN	2.12853	1.08985	7.09926e-07	0.000121065	up	yes	146.559	238.531	232.136	108.009	103.724	78.2458
ssc05203	Human Diseases	Cancer: overview	Viral carcinogenesis	0.0560358	0.24002	ENSSSCG00000038694	CCND2	2.82238	1.49691	3.51989e-06	0.000482286	up	yes	2.2395	2.26468	1.56766	0.690152	0.583219	0.877948
ssc05203	Human Diseases	Cancer: overview	Viral carcinogenesis	0.0560358	0.24002	ENSSSCG00000024344	CCR5	0.249042	-2.00554	4.44359e-06	0.000581938	down	yes	0.837351	0.312658	1.13779	3.60922	3.42421	2.15298
ssc05203	Human Diseases	Cancer: overview	Viral carcinogenesis	0.0560358	0.24002	ENSSSCG00000001229	ENSSSCG00000001229	0.42378	-1.23861	7.47488e-05	0.00511122	down	yes	92.9244	55.0207	64.4142	218.512	183.604	98.9914
ssc05203	Human Diseases	Cancer: overview	Viral carcinogenesis	0.0560358	0.24002	ENSSSCG00000006095	CCNE2	0.430658	-1.21539	0.000745772	0.0287444	down	yes	1.26223	1.7483	2.01328	4.72691	4.49502	2.4435
ssc05416	Human Diseases	Cardiovascular disease	Viral myocarditis	0.0575363	0.242407	ENSSSCG00000025133	ITGB2	0.381078	-1.39184	2.91286e-07	5.70633e-05	down	yes	2.92941	1.79459	2.96807	5.92198	6.52439	7.73865
ssc05416	Human Diseases	Cardiovascular disease	Viral myocarditis	0.0575363	0.242407	ENSSSCG00000052432	ENSSSCG00000052432	0.352776	-1.50318	6.48008e-07	0.000112119	down	yes	243.665	117.407	228.564	668.892	616.582	385.948
ssc05416	Human Diseases	Cardiovascular disease	Viral myocarditis	0.0575363	0.242407	ENSSSCG00000001229	ENSSSCG00000001229	0.42378	-1.23861	7.47488e-05	0.00511122	down	yes	92.9244	55.0207	64.4142	218.512	183.604	98.9914
ssc05416	Human Diseases	Cardiovascular disease	Viral myocarditis	0.0575363	0.242407	ENSSSCG00000034767	LAMA1	10.9754	3.4562	0.000363827	0.0170438	up	yes	0.069928	0.115821	0.066322	0.010591	0.012376	0
ssc00500	Metabolism	Carbohydrate metabolism	Starch and sucrose metabolism	0.0603885	0.25032	ENSSSCG00000028204	TREH	0.168418	-2.56988	3.53805e-12	2.15041e-09	down	yes	0.493462	0.875588	1.35777	5.17564	5.28433	5.73084
ssc00500	Metabolism	Carbohydrate metabolism	Starch and sucrose metabolism	0.0603885	0.25032	ENSSSCG00000036331	ENSSSCG00000036331	0.257215	-1.95895	0.000574682	0.0236909	down	yes	1.63153	0.381728	1.8181	7.97764	4.44577	2.47214
ssc00500	Metabolism	Carbohydrate metabolism	Starch and sucrose metabolism	0.0603885	0.25032	ENSSSCG00000014048	HK3	0.44934	-1.15412	0.00117174	0.0400821	down	yes	3.2522	2.97804	4.95353	10.3246	9.83361	4.73113
ssc04066	Environmental Information Processing	Signal transduction	HIF-1 signaling pathway	0.0647089	0.260582	ENSSSCG00000036246	GP91-PHOX	0.200829	-2.31596	4.81254e-17	1.14077e-13	down	yes	1.41299	0.869504	1.42653	7.58359	6.22046	4.66449
ssc04066	Environmental Information Processing	Signal transduction	HIF-1 signaling pathway	0.0647089	0.260582	ENSSSCG00000017755	NOS2	0.297181	-1.75059	1.84656e-07	3.90812e-05	down	yes	2.46124	2.02222	2.07884	9.86271	8.36997	3.84918
ssc04066	Environmental Information Processing	Signal transduction	HIF-1 signaling pathway	0.0647089	0.260582	ENSSSCG00000005503	TLR4	0.48183	-1.0534	4.41424e-05	0.00341945	down	yes	1.89913	1.43729	1.84978	4.41603	3.74549	2.60203
ssc04066	Environmental Information Processing	Signal transduction	HIF-1 signaling pathway	0.0647089	0.260582	ENSSSCG00000039535	CAMK2B	0.0501412	-4.31786	0.00011841	0.0073067	down	yes	0.0813007	0	0.049531	1.51878	1.04571	0.0447753
ssc04066	Environmental Information Processing	Signal transduction	HIF-1 signaling pathway	0.0647089	0.260582	ENSSSCG00000016450	NOS3	0.432766	-1.20834	0.000155416	0.00902937	down	yes	19.8828	15.445	15.7595	51.4707	45.3423	21.2353
ssc04066	Environmental Information Processing	Signal transduction	HIF-1 signaling pathway	0.0647089	0.260582	ENSSSCG00000014048	HK3	0.44934	-1.15412	0.00117174	0.0400821	down	yes	3.2522	2.97804	4.95353	10.3246	9.83361	4.73113
ssc05132	Human Diseases	Infectious disease: bacterial	Salmonella infection	0.0657379	0.260582	ENSSSCG00000036352	RAB7B	0.211099	-2.24401	2.62719e-13	2.23924e-10	down	yes	0.533683	0.660679	0.64241	2.36503	3.20816	3.12778
ssc05132	Human Diseases	Infectious disease: bacterial	Salmonella infection	0.0657379	0.260582	ENSSSCG00000009002	TLR2	0.261758	-1.9337	1.45329e-12	9.84254e-10	down	yes	0.242131	0.198378	0.235175	0.963629	0.920697	0.697003
ssc05132	Human Diseases	Infectious disease: bacterial	Salmonella infection	0.0657379	0.260582	ENSSSCG00000009633	ENSSSCG00000009633	0.340632	-1.55371	4.99525e-10	2.00691e-07	down	yes	10.7651	11.8382	10.0347	39.7181	34.0498	22.0479
ssc05132	Human Diseases	Infectious disease: bacterial	Salmonella infection	0.0657379	0.260582	ENSSSCG00000000295	NCKAP1L	0.311838	-1.68113	3.49624e-07	6.62999e-05	down	yes	1.36471	0.530458	0.965278	3.08772	3.31016	2.77499
ssc05132	Human Diseases	Infectious disease: bacterial	Salmonella infection	0.0657379	0.260582	ENSSSCG00000031912	JUN	2.12853	1.08985	7.09926e-07	0.000121065	up	yes	146.559	238.531	232.136	108.009	103.724	78.2458
ssc05132	Human Diseases	Infectious disease: bacterial	Salmonella infection	0.0657379	0.260582	ENSSSCG00000014369	CD14	0.373648	-1.42025	2.43896e-06	0.000354681	down	yes	2.57021	3.02635	4.03999	10.4672	9.46869	5.85457
ssc05132	Human Diseases	Infectious disease: bacterial	Salmonella infection	0.0657379	0.260582	ENSSSCG00000058071	ENSSSCG00000058071	0.305699	-1.70982	3.3132e-05	0.00274602	down	yes	3.6129	2.25998	5.42536	16.9983	14.0993	5.86118
ssc05132	Human Diseases	Infectious disease: bacterial	Salmonella infection	0.0657379	0.260582	ENSSSCG00000005503	TLR4	0.48183	-1.0534	4.41424e-05	0.00341945	down	yes	1.89913	1.43729	1.84978	4.41603	3.74549	2.60203
ssc05132	Human Diseases	Infectious disease: bacterial	Salmonella infection	0.0657379	0.260582	ENSSSCG00000039214	ENSSSCG00000039214	0.0285872	-5.12849	6.6841e-05	0.00472955	down	yes	0.071811	0	0	1.28911	1.08481	0.138086
ssc05132	Human Diseases	Infectious disease: bacterial	Salmonella infection	0.0657379	0.260582	ENSSSCG00000002383	FOS	2.65249	1.40735	0.000341806	0.0164344	up	yes	51.7257	134.672	160.001	61.4612	50.8367	18.2962
ssc05132	Human Diseases	Infectious disease: bacterial	Salmonella infection	0.0657379	0.260582	ENSSSCG00000009300	WASF3	0.417374	-1.26059	0.000937209	0.03366	down	yes	4.03777	1.52008	3.0152	8.39921	7.87603	4.26522
ssc00910	Metabolism	Energy metabolism	Nitrogen metabolism	0.0659059	0.260582	ENSSSCG00000023186	CA4	0.331803	-1.5916	0.000135906	0.00817641	down	yes	10.7935	10.3256	6.77742	38.2227	34.1264	11.7262
ssc00910	Metabolism	Energy metabolism	Nitrogen metabolism	0.0659059	0.260582	ENSSSCG00000006140	CA2	0.397894	-1.32955	0.00130042	0.0432329	down	yes	1.53221	0.538667	1.02071	2.33162	2.49577	2.94248
ssc05169	Human Diseases	Infectious disease: viral	Epstein-Barr virus infection	0.0694018	0.270247	ENSSSCG00000009002	TLR2	0.261758	-1.9337	1.45329e-12	9.84254e-10	down	yes	0.242131	0.198378	0.235175	0.963629	0.920697	0.697003
ssc05169	Human Diseases	Infectious disease: viral	Epstein-Barr virus infection	0.0694018	0.270247	ENSSSCG00000035249	GADD45G	2.50964	1.32748	1.97273e-12	1.29893e-09	up	yes	138.309	123.41	124.43	59.6796	57.9817	36.2047
ssc05169	Human Diseases	Infectious disease: viral	Epstein-Barr virus infection	0.0694018	0.270247	ENSSSCG00000000884	APAF1	0.352906	-1.50264	6.00109e-07	0.00010537	down	yes	5.15605	6.92886	7.05755	23.5103	19.6224	11.1096
ssc05169	Human Diseases	Infectious disease: viral	Epstein-Barr virus infection	0.0694018	0.270247	ENSSSCG00000052432	ENSSSCG00000052432	0.352776	-1.50318	6.48008e-07	0.000112119	down	yes	243.665	117.407	228.564	668.892	616.582	385.948
ssc05169	Human Diseases	Infectious disease: viral	Epstein-Barr virus infection	0.0694018	0.270247	ENSSSCG00000031912	JUN	2.12853	1.08985	7.09926e-07	0.000121065	up	yes	146.559	238.531	232.136	108.009	103.724	78.2458
ssc05169	Human Diseases	Infectious disease: viral	Epstein-Barr virus infection	0.0694018	0.270247	ENSSSCG00000038694	CCND2	2.82238	1.49691	3.51989e-06	0.000482286	up	yes	2.2395	2.26468	1.56766	0.690152	0.583219	0.877948
ssc05169	Human Diseases	Infectious disease: viral	Epstein-Barr virus infection	0.0694018	0.270247	ENSSSCG00000010504	BLNK	0.330236	-1.59843	1.05918e-05	0.00113509	down	yes	0.491579	0.242817	0.407969	1.48911	1.03319	0.936934
ssc05169	Human Diseases	Infectious disease: viral	Epstein-Barr virus infection	0.0694018	0.270247	ENSSSCG00000001229	ENSSSCG00000001229	0.42378	-1.23861	7.47488e-05	0.00511122	down	yes	92.9244	55.0207	64.4142	218.512	183.604	98.9914
ssc05169	Human Diseases	Infectious disease: viral	Epstein-Barr virus infection	0.0694018	0.270247	ENSSSCG00000006095	CCNE2	0.430658	-1.21539	0.000745772	0.0287444	down	yes	1.26223	1.7483	2.01328	4.72691	4.49502	2.4435
ssc04512	Environmental Information Processing	Signaling molecules and interaction	ECM-receptor interaction	0.0720168	0.276243	ENSSSCG00000009216	SPP1	0.137138	-2.8663	6.63822e-16	1.2104e-12	down	yes	9.85735	26.3966	17.2624	122.618	126.493	141.128
ssc04512	Environmental Information Processing	Signaling molecules and interaction	ECM-receptor interaction	0.0720168	0.276243	ENSSSCG00000015405	ENSSSCG00000015405	0.285037	-1.81078	4.64856e-09	1.46919e-06	down	yes	2.24569	1.27234	1.56819	6.5817	6.48757	4.7748
ssc04512	Environmental Information Processing	Signaling molecules and interaction	ECM-receptor interaction	0.0720168	0.276243	ENSSSCG00000015556	LAMC2	0.383146	-1.38403	2.49125e-05	0.00220345	down	yes	4.45587	5.68009	5.54977	17.6243	15.8388	7.47622
ssc04512	Environmental Information Processing	Signaling molecules and interaction	ECM-receptor interaction	0.0720168	0.276243	ENSSSCG00000034767	LAMA1	10.9754	3.4562	0.000363827	0.0170438	up	yes	0.069928	0.115821	0.066322	0.010591	0.012376	0
ssc04512	Environmental Information Processing	Signaling molecules and interaction	ECM-receptor interaction	0.0720168	0.276243	ENSSSCG00000063008	ITGA2B	0.325185	-1.62067	0.00150106	0.0486746	down	yes	1.49931	0.648918	1.18789	4.51148	4.56509	1.18256
ssc04929	Organismal Systems	Endocrine system	GnRH secretion	0.0856251	0.323612	ENSSSCG00000009216	SPP1	0.137138	-2.8663	6.63822e-16	1.2104e-12	down	yes	9.85735	26.3966	17.2624	122.618	126.493	141.128
ssc04929	Organismal Systems	Endocrine system	GnRH secretion	0.0856251	0.323612	ENSSSCG00000014852	ARRB1	0.409585	-1.28776	4.25724e-10	1.73989e-07	down	yes	4.0559	2.85499	3.12716	9.11295	8.37177	7.02312
ssc04929	Organismal Systems	Endocrine system	GnRH secretion	0.0856251	0.323612	ENSSSCG00000041764	CACNA1C	0.417116	-1.26148	0.000233939	0.0122413	down	yes	0.652194	0.690959	0.533839	1.75916	1.81219	0.928585
ssc04929	Organismal Systems	Endocrine system	GnRH secretion	0.0856251	0.323612	ENSSSCG00000003069	KCNN4	0.0418916	-4.57719	0.000784314	0.0295571	down	yes	0	0.0479259	0	0.24044	0.190336	0.713268
ssc00220	Metabolism	Amino acid metabolism	Arginine biosynthesis	0.0892201	0.332312	ENSSSCG00000017755	NOS2	0.297181	-1.75059	1.84656e-07	3.90812e-05	down	yes	2.46124	2.02222	2.07884	9.86271	8.36997	3.84918
ssc00220	Metabolism	Amino acid metabolism	Arginine biosynthesis	0.0892201	0.332312	ENSSSCG00000016450	NOS3	0.432766	-1.20834	0.000155416	0.00902937	down	yes	19.8828	15.445	15.7595	51.4707	45.3423	21.2353
ssc04666	Organismal Systems	Immune system	Fc gamma R-mediated phagocytosis	0.090573	0.332532	ENSSSCG00000015353	SCIN	0.15089	-2.72844	1.58808e-11	8.3653e-09	down	yes	0.446263	1.31069	0.932717	5.81159	5.4549	6.55893
ssc04666	Organismal Systems	Immune system	Fc gamma R-mediated phagocytosis	0.090573	0.332532	ENSSSCG00000013553	VAV1	0.288444	-1.79363	3.42588e-08	8.28644e-06	down	yes	1.22791	0.625221	1.31869	4.30399	3.77463	2.91766
ssc04666	Organismal Systems	Immune system	Fc gamma R-mediated phagocytosis	0.090573	0.332532	ENSSSCG00000007722	NCF1	0.251899	-1.98908	3.84727e-05	0.00309138	down	yes	0.231731	0.167342	0.273456	1.11024	0.940043	0.619553
ssc04666	Organismal Systems	Immune system	Fc gamma R-mediated phagocytosis	0.090573	0.332532	ENSSSCG00000006350	ENSSSCG00000006350	0.252899	-1.98337	6.82436e-05	0.00477181	down	yes	5.61981	0.947202	3.26057	16.1536	13.7744	8.93164
ssc04666	Organismal Systems	Immune system	Fc gamma R-mediated phagocytosis	0.090573	0.332532	ENSSSCG00000009300	WASF3	0.417374	-1.26059	0.000937209	0.03366	down	yes	4.03777	1.52008	3.0152	8.39921	7.87603	4.26522
ssc04921	Organismal Systems	Endocrine system	Oxytocin signaling pathway	0.093312	0.336378	ENSSSCG00000031912	JUN	2.12853	1.08985	7.09926e-07	0.000121065	up	yes	146.559	238.531	232.136	108.009	103.724	78.2458
ssc04921	Organismal Systems	Endocrine system	Oxytocin signaling pathway	0.093312	0.336378	ENSSSCG00000017991	PIK3R5	0.434454	-1.20272	1.8338e-05	0.00173181	down	yes	1.1792	0.846518	1.06752	2.17675	2.86488	2.07819
ssc04921	Organismal Systems	Endocrine system	Oxytocin signaling pathway	0.093312	0.336378	ENSSSCG00000039535	CAMK2B	0.0501412	-4.31786	0.00011841	0.0073067	down	yes	0.0813007	0	0.049531	1.51878	1.04571	0.0447753
ssc04921	Organismal Systems	Endocrine system	Oxytocin signaling pathway	0.093312	0.336378	ENSSSCG00000016450	NOS3	0.432766	-1.20834	0.000155416	0.00902937	down	yes	19.8828	15.445	15.7595	51.4707	45.3423	21.2353
ssc04921	Organismal Systems	Endocrine system	Oxytocin signaling pathway	0.093312	0.336378	ENSSSCG00000041764	CACNA1C	0.417116	-1.26148	0.000233939	0.0122413	down	yes	0.652194	0.690959	0.533839	1.75916	1.81219	0.928585
ssc04921	Organismal Systems	Endocrine system	Oxytocin signaling pathway	0.093312	0.336378	ENSSSCG00000002383	FOS	2.65249	1.40735	0.000341806	0.0164344	up	yes	51.7257	134.672	160.001	61.4612	50.8367	18.2962
ssc04921	Organismal Systems	Endocrine system	Oxytocin signaling pathway	0.093312	0.336378	ENSSSCG00000058790	RYR1	0.0971762	-3.36325	0.000776237	0.0294871	down	yes	0.00557775	0	0.0358295	0.155492	0.194144	0.0764682
ssc00260	Metabolism	Amino acid metabolism	Glycine, serine and threonine metabolism	0.0942382	0.336378	ENSSSCG00000005740	SARDH	0.0996669	-3.32674	4.48481e-05	0.00345586	down	yes	0.143634	0.0862974	0.125092	0.141478	0.696402	2.72422
ssc00260	Metabolism	Amino acid metabolism	Glycine, serine and threonine metabolism	0.0942382	0.336378	ENSSSCG00000016829	AGXT2	0.146103	-2.77495	0.000108233	0.00681164	down	yes	0.208712	0.0272652	0.0378371	0.453386	0.552215	0.868524
ssc00260	Metabolism	Amino acid metabolism	Glycine, serine and threonine metabolism	0.0942382	0.336378	ENSSSCG00000007748	PSPH	2.26805	1.18145	0.000825442	0.0306681	up	yes	9.42477	11.8839	13.4987	3.09206	3.96685	8.2879
ssc05221	Human Diseases	Cancer: specific types	Acute myeloid leukemia	0.0976016	0.342152	ENSSSCG00000014441	CSF1R	0.267402	-1.90292	5.30672e-09	1.61802e-06	down	yes	12.3228	4.42678	8.77211	36.1176	33.7569	25.5687
ssc05221	Human Diseases	Cancer: specific types	Acute myeloid leukemia	0.0976016	0.342152	ENSSSCG00000013237	SPI1	0.398203	-1.32842	4.06709e-07	7.41587e-05	down	yes	11.5438	7.67205	9.23279	28.2218	26.2191	17.0016
ssc05221	Human Diseases	Cancer: specific types	Acute myeloid leukemia	0.0976016	0.342152	ENSSSCG00000014369	CD14	0.373648	-1.42025	2.43896e-06	0.000354681	down	yes	2.57021	3.02635	4.03999	10.4672	9.46869	5.85457
ssc05221	Human Diseases	Cancer: specific types	Acute myeloid leukemia	0.0976016	0.342152	ENSSSCG00000035537	RUNX1	0.47027	-1.08844	0.00118562	0.0404374	down	yes	0.761275	0.845569	0.951095	2.4498	1.82238	1.16712
ssc04218	Cellular Processes	Cell growth and death	Cellular senescence	0.0985184	0.342152	ENSSSCG00000035249	GADD45G	2.50964	1.32748	1.97273e-12	1.29893e-09	up	yes	138.309	123.41	124.43	59.6796	57.9817	36.2047
ssc04218	Cellular Processes	Cell growth and death	Cellular senescence	0.0985184	0.342152	ENSSSCG00000052432	ENSSSCG00000052432	0.352776	-1.50318	6.48008e-07	0.000112119	down	yes	243.665	117.407	228.564	668.892	616.582	385.948
ssc04218	Cellular Processes	Cell growth and death	Cellular senescence	0.0985184	0.342152	ENSSSCG00000038694	CCND2	2.82238	1.49691	3.51989e-06	0.000482286	up	yes	2.2395	2.26468	1.56766	0.690152	0.583219	0.877948
ssc04218	Cellular Processes	Cell growth and death	Cellular senescence	0.0985184	0.342152	ENSSSCG00000007366	MYBL2	0.290673	-1.78253	1.98301e-05	0.0018506	down	yes	1.78881	2.70435	1.65304	9.64097	8.12695	3.3768
ssc04218	Cellular Processes	Cell growth and death	Cellular senescence	0.0985184	0.342152	ENSSSCG00000001229	ENSSSCG00000001229	0.42378	-1.23861	7.47488e-05	0.00511122	down	yes	92.9244	55.0207	64.4142	218.512	183.604	98.9914
ssc04218	Cellular Processes	Cell growth and death	Cellular senescence	0.0985184	0.342152	ENSSSCG00000008090	IL1A	0.0874798	-3.51491	0.000343591	0.0164868	down	yes	0	0.138294	0.158153	1.4831	1.47258	0.433082
ssc04218	Cellular Processes	Cell growth and death	Cellular senescence	0.0985184	0.342152	ENSSSCG00000006095	CCNE2	0.430658	-1.21539	0.000745772	0.0287444	down	yes	1.26223	1.7483	2.01328	4.72691	4.49502	2.4435
ssc00290	Metabolism	Amino acid metabolism	Valine, leucine and isoleucine biosynthesis	0.102018	0.346936	ENSSSCG00000029163	BCAT1	0.482346	-1.05186	0.000574151	0.0236909	down	yes	0.589561	0.638057	1.03372	1.77002	1.54194	1.37624
ssc04217	Cellular Processes	Cell growth and death	Necroptosis	0.103882	0.346936	ENSSSCG00000036246	GP91-PHOX	0.200829	-2.31596	4.81254e-17	1.14077e-13	down	yes	1.41299	0.869504	1.42653	7.58359	6.22046	4.66449
ssc04217	Cellular Processes	Cell growth and death	Necroptosis	0.103882	0.346936	ENSSSCG00000009633	ENSSSCG00000009633	0.340632	-1.55371	4.99525e-10	2.00691e-07	down	yes	10.7651	11.8382	10.0347	39.7181	34.0498	22.0479
ssc04217	Cellular Processes	Cell growth and death	Necroptosis	0.103882	0.346936	ENSSSCG00000058071	ENSSSCG00000058071	0.305699	-1.70982	3.3132e-05	0.00274602	down	yes	3.6129	2.25998	5.42536	16.9983	14.0993	5.86118
ssc04217	Cellular Processes	Cell growth and death	Necroptosis	0.103882	0.346936	ENSSSCG00000005503	TLR4	0.48183	-1.0534	4.41424e-05	0.00341945	down	yes	1.89913	1.43729	1.84978	4.41603	3.74549	2.60203
ssc04217	Cellular Processes	Cell growth and death	Necroptosis	0.103882	0.346936	ENSSSCG00000039214	ENSSSCG00000039214	0.0285872	-5.12849	6.6841e-05	0.00472955	down	yes	0.071811	0	0	1.28911	1.08481	0.138086
ssc04217	Cellular Processes	Cell growth and death	Necroptosis	0.103882	0.346936	ENSSSCG00000039535	CAMK2B	0.0501412	-4.31786	0.00011841	0.0073067	down	yes	0.0813007	0	0.049531	1.51878	1.04571	0.0447753
ssc04217	Cellular Processes	Cell growth and death	Necroptosis	0.103882	0.346936	ENSSSCG00000008090	IL1A	0.0874798	-3.51491	0.000343591	0.0164868	down	yes	0	0.138294	0.158153	1.4831	1.47258	0.433082
ssc04810	Cellular Processes	Cell motility	Regulation of actin cytoskeleton	0.103946	0.346936	ENSSSCG00000015353	SCIN	0.15089	-2.72844	1.58808e-11	8.3653e-09	down	yes	0.446263	1.31069	0.932717	5.81159	5.4549	6.55893
ssc04810	Cellular Processes	Cell motility	Regulation of actin cytoskeleton	0.103946	0.346936	ENSSSCG00000017142	BAIAP2	2.50395	1.32421	7.61515e-10	2.94528e-07	up	yes	4.73863	5.38765	5.54927	1.75594	2.01577	2.48862
ssc04810	Cellular Processes	Cell motility	Regulation of actin cytoskeleton	0.103946	0.346936	ENSSSCG00000013553	VAV1	0.288444	-1.79363	3.42588e-08	8.28644e-06	down	yes	1.22791	0.625221	1.31869	4.30399	3.77463	2.91766
ssc04810	Cellular Processes	Cell motility	Regulation of actin cytoskeleton	0.103946	0.346936	ENSSSCG00000025133	ITGB2	0.381078	-1.39184	2.91286e-07	5.70633e-05	down	yes	2.92941	1.79459	2.96807	5.92198	6.52439	7.73865
ssc04810	Cellular Processes	Cell motility	Regulation of actin cytoskeleton	0.103946	0.346936	ENSSSCG00000000295	NCKAP1L	0.311838	-1.68113	3.49624e-07	6.62999e-05	down	yes	1.36471	0.530458	0.965278	3.08772	3.31016	2.77499
ssc04810	Cellular Processes	Cell motility	Regulation of actin cytoskeleton	0.103946	0.346936	ENSSSCG00000013261	CHRM4	0.000540989	-10.8521	2.46284e-05	0.0021947	down	yes	0	0	0	0.289203	0.215997	0.04934
ssc04810	Cellular Processes	Cell motility	Regulation of actin cytoskeleton	0.103946	0.346936	ENSSSCG00000039416	CXCR4	0.353752	-1.49919	8.43721e-05	0.00557091	down	yes	2.88652	1.8953	2.56487	9.5084	7.60031	3.65923
ssc04810	Cellular Processes	Cell motility	Regulation of actin cytoskeleton	0.103946	0.346936	ENSSSCG00000035828	ENSSSCG00000035828	0.399775	-1.32274	0.00112235	0.039133	down	yes	0.362236	0.174926	0.324895	0.787669	0.559603	0.809083
ssc04810	Cellular Processes	Cell motility	Regulation of actin cytoskeleton	0.103946	0.346936	ENSSSCG00000063008	ITGA2B	0.325185	-1.62067	0.00150106	0.0486746	down	yes	1.49931	0.648918	1.18789	4.51148	4.56509	1.18256
ssc04713	Organismal Systems	Environmental adaptation	Circadian entrainment	0.115031	0.378605	ENSSSCG00000016672	ADCYAP1R1	0.327174	-1.61187	2.95446e-06	0.000417083	down	yes	3.85209	2.29967	6.26769	12.101	11.4899	14.3689
ssc04713	Organismal Systems	Environmental adaptation	Circadian entrainment	0.115031	0.378605	ENSSSCG00000039535	CAMK2B	0.0501412	-4.31786	0.00011841	0.0073067	down	yes	0.0813007	0	0.049531	1.51878	1.04571	0.0447753
ssc04713	Organismal Systems	Environmental adaptation	Circadian entrainment	0.115031	0.378605	ENSSSCG00000041764	CACNA1C	0.417116	-1.26148	0.000233939	0.0122413	down	yes	0.652194	0.690959	0.533839	1.75916	1.81219	0.928585
ssc04713	Organismal Systems	Environmental adaptation	Circadian entrainment	0.115031	0.378605	ENSSSCG00000002383	FOS	2.65249	1.40735	0.000341806	0.0164344	up	yes	51.7257	134.672	160.001	61.4612	50.8367	18.2962
ssc04713	Organismal Systems	Environmental adaptation	Circadian entrainment	0.115031	0.378605	ENSSSCG00000058790	RYR1	0.0971762	-3.36325	0.000776237	0.0294871	down	yes	0.00557775	0	0.0358295	0.155492	0.194144	0.0764682
ssc05320	Human Diseases	Immune disease	Autoimmune thyroid disease	0.116381	0.378605	ENSSSCG00000052432	ENSSSCG00000052432	0.352776	-1.50318	6.48008e-07	0.000112119	down	yes	243.665	117.407	228.564	668.892	616.582	385.948
ssc05320	Human Diseases	Immune disease	Autoimmune thyroid disease	0.116381	0.378605	ENSSSCG00000001229	ENSSSCG00000001229	0.42378	-1.23861	7.47488e-05	0.00511122	down	yes	92.9244	55.0207	64.4142	218.512	183.604	98.9914
ssc05320	Human Diseases	Immune disease	Autoimmune thyroid disease	0.116381	0.378605	ENSSSCG00000016122	CTLA4	0.000568433	-10.7807	0.000522909	0.0219663	down	yes	0	0	0	0.313975	0.140938	0.072854
ssc05163	Human Diseases	Infectious disease: viral	Human cytomegalovirus infection	0.123078	0.39539	ENSSSCG00000011322	CCR1	0.091636	-3.44794	3.63366e-13	2.97008e-10	down	yes	0.170582	0.590019	0.819318	5.88509	6.61595	4.74021
ssc05163	Human Diseases	Infectious disease: viral	Human cytomegalovirus infection	0.123078	0.39539	ENSSSCG00000024311	CCR2	0.108001	-3.21089	1.93508e-11	9.75939e-09	down	yes	0.211259	0.0428126	0.117214	1.46904	1.10976	0.859002
ssc05163	Human Diseases	Infectious disease: viral	Human cytomegalovirus infection	0.123078	0.39539	ENSSSCG00000052432	ENSSSCG00000052432	0.352776	-1.50318	6.48008e-07	0.000112119	down	yes	243.665	117.407	228.564	668.892	616.582	385.948
ssc05163	Human Diseases	Infectious disease: viral	Human cytomegalovirus infection	0.123078	0.39539	ENSSSCG00000024344	CCR5	0.249042	-2.00554	4.44359e-06	0.000581938	down	yes	0.837351	0.312658	1.13779	3.60922	3.42421	2.15298
ssc05163	Human Diseases	Infectious disease: viral	Human cytomegalovirus infection	0.123078	0.39539	ENSSSCG00000015085	IL10RA	0.364607	-1.45559	8.77386e-06	0.000976412	down	yes	5.06632	2.05011	3.03242	10.5086	9.92731	7.39915
ssc05163	Human Diseases	Infectious disease: viral	Human cytomegalovirus infection	0.123078	0.39539	ENSSSCG00000039214	ENSSSCG00000039214	0.0285872	-5.12849	6.6841e-05	0.00472955	down	yes	0.071811	0	0	1.28911	1.08481	0.138086
ssc05163	Human Diseases	Infectious disease: viral	Human cytomegalovirus infection	0.123078	0.39539	ENSSSCG00000001229	ENSSSCG00000001229	0.42378	-1.23861	7.47488e-05	0.00511122	down	yes	92.9244	55.0207	64.4142	218.512	183.604	98.9914
ssc05163	Human Diseases	Infectious disease: viral	Human cytomegalovirus infection	0.123078	0.39539	ENSSSCG00000039416	CXCR4	0.353752	-1.49919	8.43721e-05	0.00557091	down	yes	2.88652	1.8953	2.56487	9.5084	7.60031	3.65923
ssc05163	Human Diseases	Infectious disease: viral	Human cytomegalovirus infection	0.123078	0.39539	ENSSSCG00000032343	CCL4	0.25394	-1.97744	0.000233644	0.0122413	down	yes	0.728731	1.46798	1.59811	7.38512	5.40678	2.15188
ssc00524	Metabolism	Biosynthesis of other secondary metabolites	Neomycin, kanamycin and gentamicin biosynthesis	0.12586	0.396119	ENSSSCG00000014048	HK3	0.44934	-1.15412	0.00117174	0.0400821	down	yes	3.2522	2.97804	4.95353	10.3246	9.83361	4.73113
ssc04933	Human Diseases	Endocrine and metabolic disease	AGE-RAGE signaling pathway in diabetic complications	0.126388	0.396119	ENSSSCG00000036246	GP91-PHOX	0.200829	-2.31596	4.81254e-17	1.14077e-13	down	yes	1.41299	0.869504	1.42653	7.58359	6.22046	4.66449
ssc04933	Human Diseases	Endocrine and metabolic disease	AGE-RAGE signaling pathway in diabetic complications	0.126388	0.396119	ENSSSCG00000031912	JUN	2.12853	1.08985	7.09926e-07	0.000121065	up	yes	146.559	238.531	232.136	108.009	103.724	78.2458
ssc04933	Human Diseases	Endocrine and metabolic disease	AGE-RAGE signaling pathway in diabetic complications	0.126388	0.396119	ENSSSCG00000039214	ENSSSCG00000039214	0.0285872	-5.12849	6.6841e-05	0.00472955	down	yes	0.071811	0	0	1.28911	1.08481	0.138086
ssc04933	Human Diseases	Endocrine and metabolic disease	AGE-RAGE signaling pathway in diabetic complications	0.126388	0.396119	ENSSSCG00000016450	NOS3	0.432766	-1.20834	0.000155416	0.00902937	down	yes	19.8828	15.445	15.7595	51.4707	45.3423	21.2353
ssc04933	Human Diseases	Endocrine and metabolic disease	AGE-RAGE signaling pathway in diabetic complications	0.126388	0.396119	ENSSSCG00000008090	IL1A	0.0874798	-3.51491	0.000343591	0.0164868	down	yes	0	0.138294	0.158153	1.4831	1.47258	0.433082
ssc04971	Organismal Systems	Digestive system	Gastric acid secretion	0.128348	0.397413	ENSSSCG00000006391	ATP1A2	0.41596	-1.26548	1.27357e-05	0.00129875	down	yes	0.720325	0.890562	0.655964	2.03469	1.67091	1.74409
ssc04971	Organismal Systems	Digestive system	Gastric acid secretion	0.128348	0.397413	ENSSSCG00000017951	ATP1B2	0.45804	-1.12646	5.14125e-05	0.00384442	down	yes	2.02642	1.5372	1.39938	3.37284	3.7959	3.66657
ssc04971	Organismal Systems	Digestive system	Gastric acid secretion	0.128348	0.397413	ENSSSCG00000039535	CAMK2B	0.0501412	-4.31786	0.00011841	0.0073067	down	yes	0.0813007	0	0.049531	1.51878	1.04571	0.0447753
ssc04971	Organismal Systems	Digestive system	Gastric acid secretion	0.128348	0.397413	ENSSSCG00000006140	CA2	0.397894	-1.32955	0.00130042	0.0432329	down	yes	1.53221	0.538667	1.02071	2.33162	2.49577	2.94248
ssc05030	Human Diseases	Substance dependence	Cocaine addiction	0.134138	0.410399	ENSSSCG00000031912	JUN	2.12853	1.08985	7.09926e-07	0.000121065	up	yes	146.559	238.531	232.136	108.009	103.724	78.2458
ssc05030	Human Diseases	Substance dependence	Cocaine addiction	0.134138	0.410399	ENSSSCG00000005400	GRIN3A	3.07562	1.62088	7.19319e-06	0.000831617	up	yes	0.886578	0.630603	1.09641	0.319999	0.172159	0.357617
ssc05030	Human Diseases	Substance dependence	Cocaine addiction	0.134138	0.410399	ENSSSCG00000009601	SLC18A1	0.126732	-2.98014	0.000345946	0.0165372	down	yes	0.294342	0.035834	0.026567	1.09263	1.22866	0.493638
ssc05161	Human Diseases	Infectious disease: viral	Hepatitis B	0.139267	0.417758	ENSSSCG00000009002	TLR2	0.261758	-1.9337	1.45329e-12	9.84254e-10	down	yes	0.242131	0.198378	0.235175	0.963629	0.920697	0.697003
ssc05161	Human Diseases	Infectious disease: viral	Hepatitis B	0.139267	0.417758	ENSSSCG00000000884	APAF1	0.352906	-1.50264	6.00109e-07	0.00010537	down	yes	5.15605	6.92886	7.05755	23.5103	19.6224	11.1096
ssc05161	Human Diseases	Infectious disease: viral	Hepatitis B	0.139267	0.417758	ENSSSCG00000031912	JUN	2.12853	1.08985	7.09926e-07	0.000121065	up	yes	146.559	238.531	232.136	108.009	103.724	78.2458
ssc05161	Human Diseases	Infectious disease: viral	Hepatitis B	0.139267	0.417758	ENSSSCG00000005503	TLR4	0.48183	-1.0534	4.41424e-05	0.00341945	down	yes	1.89913	1.43729	1.84978	4.41603	3.74549	2.60203
ssc05161	Human Diseases	Infectious disease: viral	Hepatitis B	0.139267	0.417758	ENSSSCG00000002383	FOS	2.65249	1.40735	0.000341806	0.0164344	up	yes	51.7257	134.672	160.001	61.4612	50.8367	18.2962
ssc05161	Human Diseases	Infectious disease: viral	Hepatitis B	0.139267	0.417758	ENSSSCG00000007436	MMP9	0.112103	-3.1571	0.000519315	0.0219036	down	yes	0.544271	0.755057	2.65784	5.2783	8.88265	21.1384
ssc05161	Human Diseases	Infectious disease: viral	Hepatitis B	0.139267	0.417758	ENSSSCG00000006095	CCNE2	0.430658	-1.21539	0.000745772	0.0287444	down	yes	1.26223	1.7483	2.01328	4.72691	4.49502	2.4435
ssc00270	Metabolism	Amino acid metabolism	Cysteine and methionine metabolism	0.140255	0.417758	ENSSSCG00000016829	AGXT2	0.146103	-2.77495	0.000108233	0.00681164	down	yes	0.208712	0.0272652	0.0378371	0.453386	0.552215	0.868524
ssc00270	Metabolism	Amino acid metabolism	Cysteine and methionine metabolism	0.140255	0.417758	ENSSSCG00000029163	BCAT1	0.482346	-1.05186	0.000574151	0.0236909	down	yes	0.589561	0.638057	1.03372	1.77002	1.54194	1.37624
ssc00270	Metabolism	Amino acid metabolism	Cysteine and methionine metabolism	0.140255	0.417758	ENSSSCG00000007287	GSS	2.15912	1.11044	0.000783454	0.0295571	up	yes	14.4623	8.47896	4.55779	3.78827	4.24754	4.70044
ssc04744	Organismal Systems	Sensory system	Phototransduction	0.14142	0.417758	ENSSSCG00000025345	GUCY2D	0.358857	-1.47852	0.00072414	0.0280474	down	yes	0.681588	0.300543	0.320806	1.27504	1.29181	1.06395
ssc04744	Organismal Systems	Sensory system	Phototransduction	0.14142	0.417758	ENSSSCG00000055915	ENSSSCG00000055915	4.46262	2.15789	0.00152979	0.0490691	up	yes	0.208798	0.468566	0.528721	0.058469	0.080233	0.131562
ssc04371	Environmental Information Processing	Signal transduction	Apelin signaling pathway	0.14556	0.418885	ENSSSCG00000009216	SPP1	0.137138	-2.8663	6.63822e-16	1.2104e-12	down	yes	9.85735	26.3966	17.2624	122.618	126.493	141.128
ssc04371	Environmental Information Processing	Signal transduction	Apelin signaling pathway	0.14556	0.418885	ENSSSCG00000007032	PLAT	0.3529	-1.50267	7.32948e-13	5.10994e-10	down	yes	14.0966	15.9588	15.708	50.3654	45.4785	33.8341
ssc04371	Environmental Information Processing	Signal transduction	Apelin signaling pathway	0.14556	0.418885	ENSSSCG00000017755	NOS2	0.297181	-1.75059	1.84656e-07	3.90812e-05	down	yes	2.46124	2.02222	2.07884	9.86271	8.36997	3.84918
ssc04371	Environmental Information Processing	Signal transduction	Apelin signaling pathway	0.14556	0.418885	ENSSSCG00000017991	PIK3R5	0.434454	-1.20272	1.8338e-05	0.00173181	down	yes	1.1792	0.846518	1.06752	2.17675	2.86488	2.07819
ssc04371	Environmental Information Processing	Signal transduction	Apelin signaling pathway	0.14556	0.418885	ENSSSCG00000016450	NOS3	0.432766	-1.20834	0.000155416	0.00902937	down	yes	19.8828	15.445	15.7595	51.4707	45.3423	21.2353
ssc04371	Environmental Information Processing	Signal transduction	Apelin signaling pathway	0.14556	0.418885	ENSSSCG00000058790	RYR1	0.0971762	-3.36325	0.000776237	0.0294871	down	yes	0.00557775	0	0.0358295	0.155492	0.194144	0.0764682
ssc04514	Environmental Information Processing	Signaling molecules and interaction	Cell adhesion molecules	0.14556	0.418885	ENSSSCG00000025133	ITGB2	0.381078	-1.39184	2.91286e-07	5.70633e-05	down	yes	2.92941	1.79459	2.96807	5.92198	6.52439	7.73865
ssc04514	Environmental Information Processing	Signaling molecules and interaction	Cell adhesion molecules	0.14556	0.418885	ENSSSCG00000052432	ENSSSCG00000052432	0.352776	-1.50318	6.48008e-07	0.000112119	down	yes	243.665	117.407	228.564	668.892	616.582	385.948
ssc04514	Environmental Information Processing	Signaling molecules and interaction	Cell adhesion molecules	0.14556	0.418885	ENSSSCG00000017934	CLDN7	3.10308	1.6337	2.03408e-05	0.00189082	up	yes	4.48926	6.32532	2.83327	1.18991	1.46911	1.73915
ssc04514	Environmental Information Processing	Signaling molecules and interaction	Cell adhesion molecules	0.14556	0.418885	ENSSSCG00000001229	ENSSSCG00000001229	0.42378	-1.23861	7.47488e-05	0.00511122	down	yes	92.9244	55.0207	64.4142	218.512	183.604	98.9914
ssc04514	Environmental Information Processing	Signaling molecules and interaction	Cell adhesion molecules	0.14556	0.418885	ENSSSCG00000016122	CTLA4	0.000568433	-10.7807	0.000522909	0.0219663	down	yes	0	0	0	0.313975	0.140938	0.072854
ssc04514	Environmental Information Processing	Signaling molecules and interaction	Cell adhesion molecules	0.14556	0.418885	ENSSSCG00000007146	SIGLEC1	0.420102	-1.25119	0.0011713	0.0400821	down	yes	0.456118	0.656922	0.483193	1.45225	1.57185	0.77553
ssc04510	Cellular Processes	Cellular community - eukaryotes	Focal adhesion	0.146964	0.418885	ENSSSCG00000009216	SPP1	0.137138	-2.8663	6.63822e-16	1.2104e-12	down	yes	9.85735	26.3966	17.2624	122.618	126.493	141.128
ssc04510	Cellular Processes	Cellular community - eukaryotes	Focal adhesion	0.146964	0.418885	ENSSSCG00000013553	VAV1	0.288444	-1.79363	3.42588e-08	8.28644e-06	down	yes	1.22791	0.625221	1.31869	4.30399	3.77463	2.91766
ssc04510	Cellular Processes	Cellular community - eukaryotes	Focal adhesion	0.146964	0.418885	ENSSSCG00000031912	JUN	2.12853	1.08985	7.09926e-07	0.000121065	up	yes	146.559	238.531	232.136	108.009	103.724	78.2458
ssc04510	Cellular Processes	Cellular community - eukaryotes	Focal adhesion	0.146964	0.418885	ENSSSCG00000038694	CCND2	2.82238	1.49691	3.51989e-06	0.000482286	up	yes	2.2395	2.26468	1.56766	0.690152	0.583219	0.877948
ssc04510	Cellular Processes	Cellular community - eukaryotes	Focal adhesion	0.146964	0.418885	ENSSSCG00000015556	LAMC2	0.383146	-1.38403	2.49125e-05	0.00220345	down	yes	4.45587	5.68009	5.54977	17.6243	15.8388	7.47622
ssc04510	Cellular Processes	Cellular community - eukaryotes	Focal adhesion	0.146964	0.418885	ENSSSCG00000039841	SHC3	0.0303958	-5.03999	0.000150148	0.00883263	down	yes	0	0	0.0177165	0.192635	0.123226	0.267002
ssc04510	Cellular Processes	Cellular community - eukaryotes	Focal adhesion	0.146964	0.418885	ENSSSCG00000034767	LAMA1	10.9754	3.4562	0.000363827	0.0170438	up	yes	0.069928	0.115821	0.066322	0.010591	0.012376	0
ssc04510	Cellular Processes	Cellular community - eukaryotes	Focal adhesion	0.146964	0.418885	ENSSSCG00000063008	ITGA2B	0.325185	-1.62067	0.00150106	0.0486746	down	yes	1.49931	0.648918	1.18789	4.51148	4.56509	1.18256
ssc04022	Environmental Information Processing	Signal transduction	cGMP-PKG signaling pathway	0.148934	0.418885	ENSSSCG00000020720	IRAG1	0.37861	-1.40122	3.23694e-09	1.06567e-06	down	yes	1.93675	2.08254	1.69043	5.45535	5.69097	3.93441
ssc04022	Environmental Information Processing	Signal transduction	cGMP-PKG signaling pathway	0.148934	0.418885	ENSSSCG00000006391	ATP1A2	0.41596	-1.26548	1.27357e-05	0.00129875	down	yes	0.720325	0.890562	0.655964	2.03469	1.67091	1.74409
ssc04022	Environmental Information Processing	Signal transduction	cGMP-PKG signaling pathway	0.148934	0.418885	ENSSSCG00000017991	PIK3R5	0.434454	-1.20272	1.8338e-05	0.00173181	down	yes	1.1792	0.846518	1.06752	2.17675	2.86488	2.07819
ssc04022	Environmental Information Processing	Signal transduction	cGMP-PKG signaling pathway	0.148934	0.418885	ENSSSCG00000009031	EDNRA	0.493443	-1.01905	2.44207e-05	0.00218858	down	yes	4.47861	3.09206	4.08091	9.60955	7.74763	6.25565
ssc04022	Environmental Information Processing	Signal transduction	cGMP-PKG signaling pathway	0.148934	0.418885	ENSSSCG00000017951	ATP1B2	0.45804	-1.12646	5.14125e-05	0.00384442	down	yes	2.02642	1.5372	1.39938	3.37284	3.7959	3.66657
ssc04022	Environmental Information Processing	Signal transduction	cGMP-PKG signaling pathway	0.148934	0.418885	ENSSSCG00000016450	NOS3	0.432766	-1.20834	0.000155416	0.00902937	down	yes	19.8828	15.445	15.7595	51.4707	45.3423	21.2353
ssc04022	Environmental Information Processing	Signal transduction	cGMP-PKG signaling pathway	0.148934	0.418885	ENSSSCG00000041764	CACNA1C	0.417116	-1.26148	0.000233939	0.0122413	down	yes	0.652194	0.690959	0.533839	1.75916	1.81219	0.928585
ssc05205	Human Diseases	Cancer: overview	Proteoglycans in cancer	0.149951	0.418885	ENSSSCG00000035524	WNT9B	0.0878802	-3.50832	1.07095e-20	5.07714e-17	down	yes	0.08171	0.088024	0.11439	1.22233	0.961308	1.04944
ssc05205	Human Diseases	Cancer: overview	Proteoglycans in cancer	0.149951	0.418885	ENSSSCG00000009002	TLR2	0.261758	-1.9337	1.45329e-12	9.84254e-10	down	yes	0.242131	0.198378	0.235175	0.963629	0.920697	0.697003
ssc05205	Human Diseases	Cancer: overview	Proteoglycans in cancer	0.149951	0.418885	ENSSSCG00000013553	VAV1	0.288444	-1.79363	3.42588e-08	8.28644e-06	down	yes	1.22791	0.625221	1.31869	4.30399	3.77463	2.91766
ssc05205	Human Diseases	Cancer: overview	Proteoglycans in cancer	0.149951	0.418885	ENSSSCG00000005503	TLR4	0.48183	-1.0534	4.41424e-05	0.00341945	down	yes	1.89913	1.43729	1.84978	4.41603	3.74549	2.60203
ssc05205	Human Diseases	Cancer: overview	Proteoglycans in cancer	0.149951	0.418885	ENSSSCG00000009237	HPSE	0.131385	-2.92812	5.78051e-05	0.0041974	down	yes	0.281513	0.09177	0.17424	2.19033	1.71377	0.263206
ssc05205	Human Diseases	Cancer: overview	Proteoglycans in cancer	0.149951	0.418885	ENSSSCG00000016364	GPC1	2.39224	1.25836	5.79037e-05	0.0041974	up	yes	36.8011	59.6101	46.5017	12.8384	18.5829	28.3188
ssc05205	Human Diseases	Cancer: overview	Proteoglycans in cancer	0.149951	0.418885	ENSSSCG00000039535	CAMK2B	0.0501412	-4.31786	0.00011841	0.0073067	down	yes	0.0813007	0	0.049531	1.51878	1.04571	0.0447753
ssc05205	Human Diseases	Cancer: overview	Proteoglycans in cancer	0.149951	0.418885	ENSSSCG00000007436	MMP9	0.112103	-3.1571	0.000519315	0.0219036	down	yes	0.544271	0.755057	2.65784	5.2783	8.88265	21.1384
ssc00280	Metabolism	Amino acid metabolism	Valine, leucine and isoleucine degradation	0.152763	0.422152	ENSSSCG00000007909	ABAT	0.293793	-1.76713	9.8396e-06	0.0010699	down	yes	1.05185	0.934704	0.686973	3.95648	3.7526	1.39096
ssc00280	Metabolism	Amino acid metabolism	Valine, leucine and isoleucine degradation	0.152763	0.422152	ENSSSCG00000016829	AGXT2	0.146103	-2.77495	0.000108233	0.00681164	down	yes	0.208712	0.0272652	0.0378371	0.453386	0.552215	0.868524
ssc00280	Metabolism	Amino acid metabolism	Valine, leucine and isoleucine degradation	0.152763	0.422152	ENSSSCG00000029163	BCAT1	0.482346	-1.05186	0.000574151	0.0236909	down	yes	0.589561	0.638057	1.03372	1.77002	1.54194	1.37624
ssc04668	Environmental Information Processing	Signal transduction	TNF signaling pathway	0.159032	0.434799	ENSSSCG00000031912	JUN	2.12853	1.08985	7.09926e-07	0.000121065	up	yes	146.559	238.531	232.136	108.009	103.724	78.2458
ssc04668	Environmental Information Processing	Signal transduction	TNF signaling pathway	0.159032	0.434799	ENSSSCG00000020705	MAP3K8	0.40704	-1.29676	5.52747e-05	0.00404874	down	yes	0.471917	0.291219	0.326944	0.984593	1.02612	0.667345
ssc04668	Environmental Information Processing	Signal transduction	TNF signaling pathway	0.159032	0.434799	ENSSSCG00000039214	ENSSSCG00000039214	0.0285872	-5.12849	6.6841e-05	0.00472955	down	yes	0.071811	0	0	1.28911	1.08481	0.138086
ssc04668	Environmental Information Processing	Signal transduction	TNF signaling pathway	0.159032	0.434799	ENSSSCG00000002383	FOS	2.65249	1.40735	0.000341806	0.0164344	up	yes	51.7257	134.672	160.001	61.4612	50.8367	18.2962
ssc04668	Environmental Information Processing	Signal transduction	TNF signaling pathway	0.159032	0.434799	ENSSSCG00000007436	MMP9	0.112103	-3.1571	0.000519315	0.0219036	down	yes	0.544271	0.755057	2.65784	5.2783	8.88265	21.1384
ssc00480	Metabolism	Metabolism of other amino acids	Glutathione metabolism	0.165609	0.448015	ENSSSCG00000027121	ODC1	0.433876	-1.20464	2.66331e-05	0.00229568	down	yes	4.39082	4.69997	4.67224	13.5644	11.1915	6.96526
ssc00480	Metabolism	Metabolism of other amino acids	Glutathione metabolism	0.165609	0.448015	ENSSSCG00000031736	MGST2	2.03303	1.02363	0.000243307	0.0125681	up	yes	15.4175	19.1406	16.8528	10.2348	10.5673	4.48566
ssc00480	Metabolism	Metabolism of other amino acids	Glutathione metabolism	0.165609	0.448015	ENSSSCG00000007287	GSS	2.15912	1.11044	0.000783454	0.0295571	up	yes	14.4623	8.47896	4.55779	3.78827	4.24754	4.70044
ssc05170	Human Diseases	Infectious disease: viral	Human immunodeficiency virus 1 infection	0.168481	0.449137	ENSSSCG00000009002	TLR2	0.261758	-1.9337	1.45329e-12	9.84254e-10	down	yes	0.242131	0.198378	0.235175	0.963629	0.920697	0.697003
ssc05170	Human Diseases	Infectious disease: viral	Human immunodeficiency virus 1 infection	0.168481	0.449137	ENSSSCG00000052432	ENSSSCG00000052432	0.352776	-1.50318	6.48008e-07	0.000112119	down	yes	243.665	117.407	228.564	668.892	616.582	385.948
ssc05170	Human Diseases	Infectious disease: viral	Human immunodeficiency virus 1 infection	0.168481	0.449137	ENSSSCG00000031912	JUN	2.12853	1.08985	7.09926e-07	0.000121065	up	yes	146.559	238.531	232.136	108.009	103.724	78.2458
ssc05170	Human Diseases	Infectious disease: viral	Human immunodeficiency virus 1 infection	0.168481	0.449137	ENSSSCG00000024344	CCR5	0.249042	-2.00554	4.44359e-06	0.000581938	down	yes	0.837351	0.312658	1.13779	3.60922	3.42421	2.15298
ssc05170	Human Diseases	Infectious disease: viral	Human immunodeficiency virus 1 infection	0.168481	0.449137	ENSSSCG00000005503	TLR4	0.48183	-1.0534	4.41424e-05	0.00341945	down	yes	1.89913	1.43729	1.84978	4.41603	3.74549	2.60203
ssc05170	Human Diseases	Infectious disease: viral	Human immunodeficiency virus 1 infection	0.168481	0.449137	ENSSSCG00000001229	ENSSSCG00000001229	0.42378	-1.23861	7.47488e-05	0.00511122	down	yes	92.9244	55.0207	64.4142	218.512	183.604	98.9914
ssc05170	Human Diseases	Infectious disease: viral	Human immunodeficiency virus 1 infection	0.168481	0.449137	ENSSSCG00000039416	CXCR4	0.353752	-1.49919	8.43721e-05	0.00557091	down	yes	2.88652	1.8953	2.56487	9.5084	7.60031	3.65923
ssc05170	Human Diseases	Infectious disease: viral	Human immunodeficiency virus 1 infection	0.168481	0.449137	ENSSSCG00000002383	FOS	2.65249	1.40735	0.000341806	0.0164344	up	yes	51.7257	134.672	160.001	61.4612	50.8367	18.2962
ssc04144	Cellular Processes	Transport and catabolism	Endocytosis	0.169519	0.449137	ENSSSCG00000012397	IL2RG	0.298773	-1.74288	1.05221e-11	5.80037e-09	down	yes	4.1612	2.96118	4.3484	15.2717	12.9891	10.1322
ssc04144	Cellular Processes	Transport and catabolism	Endocytosis	0.169519	0.449137	ENSSSCG00000014852	ARRB1	0.409585	-1.28776	4.25724e-10	1.73989e-07	down	yes	4.0559	2.85499	3.12716	9.11295	8.37177	7.02312
ssc04144	Cellular Processes	Transport and catabolism	Endocytosis	0.169519	0.449137	ENSSSCG00000052432	ENSSSCG00000052432	0.352776	-1.50318	6.48008e-07	0.000112119	down	yes	243.665	117.407	228.564	668.892	616.582	385.948
ssc04144	Cellular Processes	Transport and catabolism	Endocytosis	0.169519	0.449137	ENSSSCG00000024344	CCR5	0.249042	-2.00554	4.44359e-06	0.000581938	down	yes	0.837351	0.312658	1.13779	3.60922	3.42421	2.15298
ssc04144	Cellular Processes	Transport and catabolism	Endocytosis	0.169519	0.449137	ENSSSCG00000038732	AGAP2	0.445424	-1.16675	2.22831e-05	0.00203938	down	yes	2.04785	1.24742	2.01114	3.68855	4.23489	3.98972
ssc04144	Cellular Processes	Transport and catabolism	Endocytosis	0.169519	0.449137	ENSSSCG00000003807	DNAJC6	0.310736	-1.68624	4.08645e-05	0.00321811	down	yes	1.38804	0.768449	0.990561	4.60322	4.03945	1.48506
ssc04144	Cellular Processes	Transport and catabolism	Endocytosis	0.169519	0.449137	ENSSSCG00000001229	ENSSSCG00000001229	0.42378	-1.23861	7.47488e-05	0.00511122	down	yes	92.9244	55.0207	64.4142	218.512	183.604	98.9914
ssc04144	Cellular Processes	Transport and catabolism	Endocytosis	0.169519	0.449137	ENSSSCG00000039416	CXCR4	0.353752	-1.49919	8.43721e-05	0.00557091	down	yes	2.88652	1.8953	2.56487	9.5084	7.60031	3.65923
ssc04144	Cellular Processes	Transport and catabolism	Endocytosis	0.169519	0.449137	ENSSSCG00000027226	EPN3	2.51994	1.33339	0.000661997	0.0261533	up	yes	0.458212	0.465778	0.56167	0.231402	0.212654	0.145505
ssc04725	Organismal Systems	Nervous system	Cholinergic synapse	0.172085	0.451284	ENSSSCG00000017991	PIK3R5	0.434454	-1.20272	1.8338e-05	0.00173181	down	yes	1.1792	0.846518	1.06752	2.17675	2.86488	2.07819
ssc04725	Organismal Systems	Nervous system	Cholinergic synapse	0.172085	0.451284	ENSSSCG00000013261	CHRM4	0.000540989	-10.8521	2.46284e-05	0.0021947	down	yes	0	0	0	0.289203	0.215997	0.04934
ssc04725	Organismal Systems	Nervous system	Cholinergic synapse	0.172085	0.451284	ENSSSCG00000039535	CAMK2B	0.0501412	-4.31786	0.00011841	0.0073067	down	yes	0.0813007	0	0.049531	1.51878	1.04571	0.0447753
ssc04725	Organismal Systems	Nervous system	Cholinergic synapse	0.172085	0.451284	ENSSSCG00000041764	CACNA1C	0.417116	-1.26148	0.000233939	0.0122413	down	yes	0.652194	0.690959	0.533839	1.75916	1.81219	0.928585
ssc04725	Organismal Systems	Nervous system	Cholinergic synapse	0.172085	0.451284	ENSSSCG00000002383	FOS	2.65249	1.40735	0.000341806	0.0164344	up	yes	51.7257	134.672	160.001	61.4612	50.8367	18.2962
ssc04012	Environmental Information Processing	Signal transduction	ErbB signaling pathway	0.183488	0.476327	ENSSSCG00000031912	JUN	2.12853	1.08985	7.09926e-07	0.000121065	up	yes	146.559	238.531	232.136	108.009	103.724	78.2458
ssc04012	Environmental Information Processing	Signal transduction	ErbB signaling pathway	0.183488	0.476327	ENSSSCG00000008965	BTC	0.408452	-1.29176	4.05266e-06	0.000539687	down	yes	3.20013	5.02123	3.77263	11.1364	9.15927	9.06876
ssc04012	Environmental Information Processing	Signal transduction	ErbB signaling pathway	0.183488	0.476327	ENSSSCG00000039535	CAMK2B	0.0501412	-4.31786	0.00011841	0.0073067	down	yes	0.0813007	0	0.049531	1.51878	1.04571	0.0447753
ssc04012	Environmental Information Processing	Signal transduction	ErbB signaling pathway	0.183488	0.476327	ENSSSCG00000039841	SHC3	0.0303958	-5.03999	0.000150148	0.00883263	down	yes	0	0	0.0177165	0.192635	0.123226	0.267002
ssc04657	Organismal Systems	Immune system	IL-17 signaling pathway	0.188848	0.480533	ENSSSCG00000031912	JUN	2.12853	1.08985	7.09926e-07	0.000121065	up	yes	146.559	238.531	232.136	108.009	103.724	78.2458
ssc04657	Organismal Systems	Immune system	IL-17 signaling pathway	0.188848	0.480533	ENSSSCG00000039214	ENSSSCG00000039214	0.0285872	-5.12849	6.6841e-05	0.00472955	down	yes	0.071811	0	0	1.28911	1.08481	0.138086
ssc04657	Organismal Systems	Immune system	IL-17 signaling pathway	0.188848	0.480533	ENSSSCG00000002383	FOS	2.65249	1.40735	0.000341806	0.0164344	up	yes	51.7257	134.672	160.001	61.4612	50.8367	18.2962
ssc04657	Organismal Systems	Immune system	IL-17 signaling pathway	0.188848	0.480533	ENSSSCG00000007436	MMP9	0.112103	-3.1571	0.000519315	0.0219036	down	yes	0.544271	0.755057	2.65784	5.2783	8.88265	21.1384
ssc04976	Organismal Systems	Digestive system	Bile secretion	0.188848	0.480533	ENSSSCG00000006391	ATP1A2	0.41596	-1.26548	1.27357e-05	0.00129875	down	yes	0.720325	0.890562	0.655964	2.03469	1.67091	1.74409
ssc04976	Organismal Systems	Digestive system	Bile secretion	0.188848	0.480533	ENSSSCG00000004597	AQP9	0.177111	-2.49727	1.62134e-05	0.00156866	down	yes	0.049836	0.158799	0.080839	0.73153	0.447998	0.454894
ssc04976	Organismal Systems	Digestive system	Bile secretion	0.188848	0.480533	ENSSSCG00000017951	ATP1B2	0.45804	-1.12646	5.14125e-05	0.00384442	down	yes	2.02642	1.5372	1.39938	3.37284	3.7959	3.66657
ssc04976	Organismal Systems	Digestive system	Bile secretion	0.188848	0.480533	ENSSSCG00000006140	CA2	0.397894	-1.32955	0.00130042	0.0432329	down	yes	1.53221	0.538667	1.02071	2.33162	2.49577	2.94248
ssc04130	Genetic Information Processing	Folding, sorting and degradation	SNARE interactions in vesicular transport	0.19834	0.499739	ENSSSCG00000000703	ENSSSCG00000000703	0.330368	-1.59785	1.07336e-09	3.86545e-07	down	yes	0.582879	0.414542	0.580862	1.62281	1.62307	1.53147
ssc04130	Genetic Information Processing	Folding, sorting and degradation	SNARE interactions in vesicular transport	0.19834	0.499739	ENSSSCG00000013119	STX3	0.26	-1.94342	3.69247e-07	6.89183e-05	down	yes	0.141502	0.201795	0.162157	0.620359	0.734522	0.58917
ssc05235	Human Diseases	Cancer: overview	PD-L1 expression and PD-1 checkpoint pathway in cancer	0.205219	0.512051	ENSSSCG00000009002	TLR2	0.261758	-1.9337	1.45329e-12	9.84254e-10	down	yes	0.242131	0.198378	0.235175	0.963629	0.920697	0.697003
ssc05235	Human Diseases	Cancer: overview	PD-L1 expression and PD-1 checkpoint pathway in cancer	0.205219	0.512051	ENSSSCG00000031912	JUN	2.12853	1.08985	7.09926e-07	0.000121065	up	yes	146.559	238.531	232.136	108.009	103.724	78.2458
ssc05235	Human Diseases	Cancer: overview	PD-L1 expression and PD-1 checkpoint pathway in cancer	0.205219	0.512051	ENSSSCG00000005503	TLR4	0.48183	-1.0534	4.41424e-05	0.00341945	down	yes	1.89913	1.43729	1.84978	4.41603	3.74549	2.60203
ssc05235	Human Diseases	Cancer: overview	PD-L1 expression and PD-1 checkpoint pathway in cancer	0.205219	0.512051	ENSSSCG00000002383	FOS	2.65249	1.40735	0.000341806	0.0164344	up	yes	51.7257	134.672	160.001	61.4612	50.8367	18.2962
ssc05330	Human Diseases	Immune disease	Allograft rejection	0.208096	0.514238	ENSSSCG00000052432	ENSSSCG00000052432	0.352776	-1.50318	6.48008e-07	0.000112119	down	yes	243.665	117.407	228.564	668.892	616.582	385.948
ssc05330	Human Diseases	Immune disease	Allograft rejection	0.208096	0.514238	ENSSSCG00000001229	ENSSSCG00000001229	0.42378	-1.23861	7.47488e-05	0.00511122	down	yes	92.9244	55.0207	64.4142	218.512	183.604	98.9914
ssc05410	Human Diseases	Cardiovascular disease	Hypertrophic cardiomyopathy	0.210767	0.515877	ENSSSCG00000041764	CACNA1C	0.417116	-1.26148	0.000233939	0.0122413	down	yes	0.652194	0.690959	0.533839	1.75916	1.81219	0.928585
ssc05410	Human Diseases	Cardiovascular disease	Hypertrophic cardiomyopathy	0.210767	0.515877	ENSSSCG00000034767	LAMA1	10.9754	3.4562	0.000363827	0.0170438	up	yes	0.069928	0.115821	0.066322	0.010591	0.012376	0
ssc05410	Human Diseases	Cardiovascular disease	Hypertrophic cardiomyopathy	0.210767	0.515877	ENSSSCG00000013236	MYBPC3	0.164	-2.60823	0.00128418	0.0428735	down	yes	0.0726256	0.0165645	0.216754	0.916533	0.747464	0.20151
ssc05410	Human Diseases	Cardiovascular disease	Hypertrophic cardiomyopathy	0.210767	0.515877	ENSSSCG00000063008	ITGA2B	0.325185	-1.62067	0.00150106	0.0486746	down	yes	1.49931	0.648918	1.18789	4.51148	4.56509	1.18256
ssc05340	Human Diseases	Immune disease	Primary immunodeficiency	0.217901	0.52825	ENSSSCG00000012397	IL2RG	0.298773	-1.74288	1.05221e-11	5.80037e-09	down	yes	4.1612	2.96118	4.3484	15.2717	12.9891	10.1322
ssc05340	Human Diseases	Immune disease	Primary immunodeficiency	0.217901	0.52825	ENSSSCG00000010504	BLNK	0.330236	-1.59843	1.05918e-05	0.00113509	down	yes	0.491579	0.242817	0.407969	1.48911	1.03319	0.936934
ssc01522	Human Diseases	Drug resistance: antineoplastic	Endocrine resistance	0.221988	0.52825	ENSSSCG00000031912	JUN	2.12853	1.08985	7.09926e-07	0.000121065	up	yes	146.559	238.531	232.136	108.009	103.724	78.2458
ssc01522	Human Diseases	Drug resistance: antineoplastic	Endocrine resistance	0.221988	0.52825	ENSSSCG00000039841	SHC3	0.0303958	-5.03999	0.000150148	0.00883263	down	yes	0	0	0.0177165	0.192635	0.123226	0.267002
ssc01522	Human Diseases	Drug resistance: antineoplastic	Endocrine resistance	0.221988	0.52825	ENSSSCG00000002383	FOS	2.65249	1.40735	0.000341806	0.0164344	up	yes	51.7257	134.672	160.001	61.4612	50.8367	18.2962
ssc01522	Human Diseases	Drug resistance: antineoplastic	Endocrine resistance	0.221988	0.52825	ENSSSCG00000007436	MMP9	0.112103	-3.1571	0.000519315	0.0219036	down	yes	0.544271	0.755057	2.65784	5.2783	8.88265	21.1384
ssc04925	Organismal Systems	Endocrine system	Aldosterone synthesis and secretion	0.221988	0.52825	ENSSSCG00000006391	ATP1A2	0.41596	-1.26548	1.27357e-05	0.00129875	down	yes	0.720325	0.890562	0.655964	2.03469	1.67091	1.74409
ssc04925	Organismal Systems	Endocrine system	Aldosterone synthesis and secretion	0.221988	0.52825	ENSSSCG00000017951	ATP1B2	0.45804	-1.12646	5.14125e-05	0.00384442	down	yes	2.02642	1.5372	1.39938	3.37284	3.7959	3.66657
ssc04925	Organismal Systems	Endocrine system	Aldosterone synthesis and secretion	0.221988	0.52825	ENSSSCG00000039535	CAMK2B	0.0501412	-4.31786	0.00011841	0.0073067	down	yes	0.0813007	0	0.049531	1.51878	1.04571	0.0447753
ssc04925	Organismal Systems	Endocrine system	Aldosterone synthesis and secretion	0.221988	0.52825	ENSSSCG00000041764	CACNA1C	0.417116	-1.26148	0.000233939	0.0122413	down	yes	0.652194	0.690959	0.533839	1.75916	1.81219	0.928585
ssc04664	Organismal Systems	Immune system	Fc epsilon RI signaling pathway	0.226758	0.531891	ENSSSCG00000013553	VAV1	0.288444	-1.79363	3.42588e-08	8.28644e-06	down	yes	1.22791	0.625221	1.31869	4.30399	3.77463	2.91766
ssc04664	Organismal Systems	Immune system	Fc epsilon RI signaling pathway	0.226758	0.531891	ENSSSCG00000017006	LCP2	0.344998	-1.53534	0.000108824	0.00682426	down	yes	1.09894	0.846338	1.38263	4.3203	3.84813	1.47774
ssc04664	Organismal Systems	Immune system	Fc epsilon RI signaling pathway	0.226758	0.531891	ENSSSCG00000006357	FCER1G	0.444342	-1.17026	0.00142656	0.046706	down	yes	26.3364	10.6467	21.8834	58.2995	44.452	29.7286
ssc05414	Human Diseases	Cardiovascular disease	Dilated cardiomyopathy	0.227658	0.531891	ENSSSCG00000041764	CACNA1C	0.417116	-1.26148	0.000233939	0.0122413	down	yes	0.652194	0.690959	0.533839	1.75916	1.81219	0.928585
ssc05414	Human Diseases	Cardiovascular disease	Dilated cardiomyopathy	0.227658	0.531891	ENSSSCG00000034767	LAMA1	10.9754	3.4562	0.000363827	0.0170438	up	yes	0.069928	0.115821	0.066322	0.010591	0.012376	0
ssc05414	Human Diseases	Cardiovascular disease	Dilated cardiomyopathy	0.227658	0.531891	ENSSSCG00000013236	MYBPC3	0.164	-2.60823	0.00128418	0.0428735	down	yes	0.0726256	0.0165645	0.216754	0.916533	0.747464	0.20151
ssc05414	Human Diseases	Cardiovascular disease	Dilated cardiomyopathy	0.227658	0.531891	ENSSSCG00000063008	ITGA2B	0.325185	-1.62067	0.00150106	0.0486746	down	yes	1.49931	0.648918	1.18789	4.51148	4.56509	1.18256
ssc04142	Cellular Processes	Transport and catabolism	Lysosome	0.232899	0.536522	ENSSSCG00000006648	CTSS	0.370464	-1.4326	1.14189e-18	3.86676e-15	down	yes	18.1443	14.7939	17.6091	47.4559	45.3548	43.6326
ssc04142	Cellular Processes	Transport and catabolism	Lysosome	0.232899	0.536522	ENSSSCG00000017956	CD68	0.273002	-1.87301	7.54107e-16	1.27681e-12	down	yes	7.2383	4.47501	5.85538	21.0204	22.8847	20.4485
ssc04142	Cellular Processes	Transport and catabolism	Lysosome	0.232899	0.536522	ENSSSCG00000039798	SLC11A1	0.204041	-2.29307	6.95542e-09	1.9864e-06	down	yes	0.87844	1.99586	2.00337	9.99123	8.62163	5.29251
ssc04142	Cellular Processes	Transport and catabolism	Lysosome	0.232899	0.536522	ENSSSCG00000025034	LAPTM5	0.464664	-1.10574	8.4964e-06	0.000949993	down	yes	42.9877	24.9665	36.4134	87.226	78.0361	59.3468
ssc04142	Cellular Processes	Transport and catabolism	Lysosome	0.232899	0.536522	ENSSSCG00000008769	ENSSSCG00000008769	0.173242	-2.52914	3.60866e-05	0.00294965	down	yes	0.756292	2.44612	0.882133	3.41319	6.14892	14.015
ssc04720	Organismal Systems	Nervous system	Long-term potentiation	0.233815	0.536522	ENSSSCG00000003558	RPS6KA1	0.362549	-1.46375	7.4794e-09	2.11062e-06	down	yes	1.5968	0.916633	1.21914	3.78318	3.57171	2.9405
ssc04720	Organismal Systems	Nervous system	Long-term potentiation	0.233815	0.536522	ENSSSCG00000039535	CAMK2B	0.0501412	-4.31786	0.00011841	0.0073067	down	yes	0.0813007	0	0.049531	1.51878	1.04571	0.0447753
ssc04720	Organismal Systems	Nervous system	Long-term potentiation	0.233815	0.536522	ENSSSCG00000041764	CACNA1C	0.417116	-1.26148	0.000233939	0.0122413	down	yes	0.652194	0.690959	0.533839	1.75916	1.81219	0.928585
ssc04630	Environmental Information Processing	Signal transduction	JAK-STAT signaling pathway	0.242546	0.551631	ENSSSCG00000025795	CSF3R	0.0895656	-3.48091	1.83938e-18	5.45008e-15	down	yes	0.208293	0.260524	0.293348	2.10886	2.55495	3.84578
ssc04630	Environmental Information Processing	Signal transduction	JAK-STAT signaling pathway	0.242546	0.551631	ENSSSCG00000012397	IL2RG	0.298773	-1.74288	1.05221e-11	5.80037e-09	down	yes	4.1612	2.96118	4.3484	15.2717	12.9891	10.1322
ssc04630	Environmental Information Processing	Signal transduction	JAK-STAT signaling pathway	0.242546	0.551631	ENSSSCG00000025188	LEPR	0.0791261	-3.6597	1.14459e-07	2.60878e-05	down	yes	0.0386506	0.00801101	0.0293131	0.470512	0.353102	0.136558
ssc04630	Environmental Information Processing	Signal transduction	JAK-STAT signaling pathway	0.242546	0.551631	ENSSSCG00000038694	CCND2	2.82238	1.49691	3.51989e-06	0.000482286	up	yes	2.2395	2.26468	1.56766	0.690152	0.583219	0.877948
ssc04630	Environmental Information Processing	Signal transduction	JAK-STAT signaling pathway	0.242546	0.551631	ENSSSCG00000015085	IL10RA	0.364607	-1.45559	8.77386e-06	0.000976412	down	yes	5.06632	2.05011	3.03242	10.5086	9.92731	7.39915
ssc04630	Environmental Information Processing	Signal transduction	JAK-STAT signaling pathway	0.242546	0.551631	ENSSSCG00000000136	CSF2RB	0.259822	-1.9444	1.87754e-05	0.00176608	down	yes	0.974381	0.346324	0.321221	2.61115	2.19017	1.5181
ssc00830	Metabolism	Metabolism of cofactors and vitamins	Retinol metabolism	0.248042	0.559183	ENSSSCG00000015930	DHRS9	0.219323	-2.18887	1.06307e-05	0.00113509	down	yes	0.211662	0.357542	0.198184	1.42995	1.30568	0.763262
ssc00830	Metabolism	Metabolism of cofactors and vitamins	Retinol metabolism	0.248042	0.559183	ENSSSCG00000004822	ALDH1A3	0.484955	-1.04408	3.07534e-05	0.0025759	down	yes	3.6642	3.0817	5.23532	8.60732	8.17866	7.91984
ssc00830	Metabolism	Metabolism of cofactors and vitamins	Retinol metabolism	0.248042	0.559183	ENSSSCG00000052399	ENSSSCG00000052399	2.30484	1.20467	4.21867e-05	0.00330031	up	yes	51.2059	20.1922	52.8127	17.7993	18.7737	17.3182
ssc04972	Organismal Systems	Digestive system	Pancreatic secretion	0.250684	0.560225	ENSSSCG00000006391	ATP1A2	0.41596	-1.26548	1.27357e-05	0.00129875	down	yes	0.720325	0.890562	0.655964	2.03469	1.67091	1.74409
ssc04972	Organismal Systems	Digestive system	Pancreatic secretion	0.250684	0.560225	ENSSSCG00000017951	ATP1B2	0.45804	-1.12646	5.14125e-05	0.00384442	down	yes	2.02642	1.5372	1.39938	3.37284	3.7959	3.66657
ssc04972	Organismal Systems	Digestive system	Pancreatic secretion	0.250684	0.560225	ENSSSCG00000036331	ENSSSCG00000036331	0.257215	-1.95895	0.000574682	0.0236909	down	yes	1.63153	0.381728	1.8181	7.97764	4.44577	2.47214
ssc04972	Organismal Systems	Digestive system	Pancreatic secretion	0.250684	0.560225	ENSSSCG00000006140	CA2	0.397894	-1.32955	0.00130042	0.0432329	down	yes	1.53221	0.538667	1.02071	2.33162	2.49577	2.94248
ssc00250	Metabolism	Amino acid metabolism	Alanine, aspartate and glutamate metabolism	0.257429	0.561425	ENSSSCG00000007909	ABAT	0.293793	-1.76713	9.8396e-06	0.0010699	down	yes	1.05185	0.934704	0.686973	3.95648	3.7526	1.39096
ssc00250	Metabolism	Amino acid metabolism	Alanine, aspartate and glutamate metabolism	0.257429	0.561425	ENSSSCG00000016829	AGXT2	0.146103	-2.77495	0.000108233	0.00681164	down	yes	0.208712	0.0272652	0.0378371	0.453386	0.552215	0.868524
ssc04960	Organismal Systems	Excretory system	Aldosterone-regulated sodium reabsorption	0.257429	0.561425	ENSSSCG00000006391	ATP1A2	0.41596	-1.26548	1.27357e-05	0.00129875	down	yes	0.720325	0.890562	0.655964	2.03469	1.67091	1.74409
ssc04960	Organismal Systems	Excretory system	Aldosterone-regulated sodium reabsorption	0.257429	0.561425	ENSSSCG00000017951	ATP1B2	0.45804	-1.12646	5.14125e-05	0.00384442	down	yes	2.02642	1.5372	1.39938	3.37284	3.7959	3.66657
ssc04915	Organismal Systems	Endocrine system	Estrogen signaling pathway	0.257775	0.561425	ENSSSCG00000031912	JUN	2.12853	1.08985	7.09926e-07	0.000121065	up	yes	146.559	238.531	232.136	108.009	103.724	78.2458
ssc04915	Organismal Systems	Endocrine system	Estrogen signaling pathway	0.257775	0.561425	ENSSSCG00000039841	SHC3	0.0303958	-5.03999	0.000150148	0.00883263	down	yes	0	0	0.0177165	0.192635	0.123226	0.267002
ssc04915	Organismal Systems	Endocrine system	Estrogen signaling pathway	0.257775	0.561425	ENSSSCG00000016450	NOS3	0.432766	-1.20834	0.000155416	0.00902937	down	yes	19.8828	15.445	15.7595	51.4707	45.3423	21.2353
ssc04915	Organismal Systems	Endocrine system	Estrogen signaling pathway	0.257775	0.561425	ENSSSCG00000002383	FOS	2.65249	1.40735	0.000341806	0.0164344	up	yes	51.7257	134.672	160.001	61.4612	50.8367	18.2962
ssc04915	Organismal Systems	Endocrine system	Estrogen signaling pathway	0.257775	0.561425	ENSSSCG00000007436	MMP9	0.112103	-3.1571	0.000519315	0.0219036	down	yes	0.544271	0.755057	2.65784	5.2783	8.88265	21.1384
ssc04924	Organismal Systems	Endocrine system	Renin secretion	0.262399	0.566693	ENSSSCG00000016672	ADCYAP1R1	0.327174	-1.61187	2.95446e-06	0.000417083	down	yes	3.85209	2.29967	6.26769	12.101	11.4899	14.3689
ssc04924	Organismal Systems	Endocrine system	Renin secretion	0.262399	0.566693	ENSSSCG00000009031	EDNRA	0.493443	-1.01905	2.44207e-05	0.00218858	down	yes	4.47861	3.09206	4.08091	9.60955	7.74763	6.25565
ssc04924	Organismal Systems	Endocrine system	Renin secretion	0.262399	0.566693	ENSSSCG00000041764	CACNA1C	0.417116	-1.26148	0.000233939	0.0122413	down	yes	0.652194	0.690959	0.533839	1.75916	1.81219	0.928585
ssc05214	Human Diseases	Cancer: specific types	Glioma	0.276858	0.58407	ENSSSCG00000035249	GADD45G	2.50964	1.32748	1.97273e-12	1.29893e-09	up	yes	138.309	123.41	124.43	59.6796	57.9817	36.2047
ssc05214	Human Diseases	Cancer: specific types	Glioma	0.276858	0.58407	ENSSSCG00000039535	CAMK2B	0.0501412	-4.31786	0.00011841	0.0073067	down	yes	0.0813007	0	0.049531	1.51878	1.04571	0.0447753
ssc05214	Human Diseases	Cancer: specific types	Glioma	0.276858	0.58407	ENSSSCG00000039841	SHC3	0.0303958	-5.03999	0.000150148	0.00883263	down	yes	0	0	0.0177165	0.192635	0.123226	0.267002
ssc04742	Organismal Systems	Sensory system	Taste transduction	0.276858	0.58407	ENSSSCG00000010552	PKD2L1	25.2035	4.65555	1.10435e-05	0.00115319	up	yes	1.06052	0.0671074	1.38641	0	0.0567456	0.043004
ssc04742	Organismal Systems	Sensory system	Taste transduction	0.276858	0.58407	ENSSSCG00000058656	P2RY1	0.47941	-1.06067	5.76827e-05	0.0041974	down	yes	1.13993	0.940842	0.929237	2.39379	2.06599	1.8188
ssc04742	Organismal Systems	Sensory system	Taste transduction	0.276858	0.58407	ENSSSCG00000041764	CACNA1C	0.417116	-1.26148	0.000233939	0.0122413	down	yes	0.652194	0.690959	0.533839	1.75916	1.81219	0.928585
ssc05219	Human Diseases	Cancer: specific types	Bladder cancer	0.277263	0.58407	ENSSSCG00000007436	MMP9	0.112103	-3.1571	0.000519315	0.0219036	down	yes	0.544271	0.755057	2.65784	5.2783	8.88265	21.1384
ssc05219	Human Diseases	Cancer: specific types	Bladder cancer	0.277263	0.58407	ENSSSCG00000010949	DAPK1	0.382112	-1.38793	0.0011241	0.039133	down	yes	1.72233	1.1468	2.38827	6.56788	5.1557	2.0352
ssc04625	Organismal Systems	Immune system	C-type lectin receptor signaling pathway	0.280114	0.585279	ENSSSCG00000000650	CLEC1B	0.00011133	-13.1329	2.35968e-07	4.86381e-05	down	yes	0	0	0	1.46641	0.7752	0.453093
ssc04625	Organismal Systems	Immune system	C-type lectin receptor signaling pathway	0.280114	0.585279	ENSSSCG00000031912	JUN	2.12853	1.08985	7.09926e-07	0.000121065	up	yes	146.559	238.531	232.136	108.009	103.724	78.2458
ssc04625	Organismal Systems	Immune system	C-type lectin receptor signaling pathway	0.280114	0.585279	ENSSSCG00000039214	ENSSSCG00000039214	0.0285872	-5.12849	6.6841e-05	0.00472955	down	yes	0.071811	0	0	1.28911	1.08481	0.138086
ssc04625	Organismal Systems	Immune system	C-type lectin receptor signaling pathway	0.280114	0.585279	ENSSSCG00000006357	FCER1G	0.444342	-1.17026	0.00142656	0.046706	down	yes	26.3364	10.6467	21.8834	58.2995	44.452	29.7286
ssc04917	Organismal Systems	Endocrine system	Prolactin signaling pathway	0.284119	0.588859	ENSSSCG00000038694	CCND2	2.82238	1.49691	3.51989e-06	0.000482286	up	yes	2.2395	2.26468	1.56766	0.690152	0.583219	0.877948
ssc04917	Organismal Systems	Endocrine system	Prolactin signaling pathway	0.284119	0.588859	ENSSSCG00000039841	SHC3	0.0303958	-5.03999	0.000150148	0.00883263	down	yes	0	0	0.0177165	0.192635	0.123226	0.267002
ssc04917	Organismal Systems	Endocrine system	Prolactin signaling pathway	0.284119	0.588859	ENSSSCG00000002383	FOS	2.65249	1.40735	0.000341806	0.0164344	up	yes	51.7257	134.672	160.001	61.4612	50.8367	18.2962
ssc04920	Organismal Systems	Endocrine system	Adipocytokine signaling pathway	0.298685	0.609223	ENSSSCG00000012880	CPT1A	0.328307	-1.60688	3.77987e-10	1.59997e-07	down	yes	6.63109	5.29289	6.21136	23.2543	20.0516	11.9332
ssc04920	Organismal Systems	Endocrine system	Adipocytokine signaling pathway	0.298685	0.609223	ENSSSCG00000015405	ENSSSCG00000015405	0.285037	-1.81078	4.64856e-09	1.46919e-06	down	yes	2.24569	1.27234	1.56819	6.5817	6.48757	4.7748
ssc04920	Organismal Systems	Endocrine system	Adipocytokine signaling pathway	0.298685	0.609223	ENSSSCG00000025188	LEPR	0.0791261	-3.6597	1.14459e-07	2.60878e-05	down	yes	0.0386506	0.00801101	0.0293131	0.470512	0.353102	0.136558
ssc04520	Cellular Processes	Cellular community - eukaryotes	Adherens junction	0.298685	0.609223	ENSSSCG00000017142	BAIAP2	2.50395	1.32421	7.61515e-10	2.94528e-07	up	yes	4.73863	5.38765	5.54927	1.75594	2.01577	2.48862
ssc04520	Cellular Processes	Cellular community - eukaryotes	Adherens junction	0.298685	0.609223	ENSSSCG00000023709	PTPRJ	0.440918	-1.18142	3.94933e-05	0.0031205	down	yes	2.1018	1.34042	1.48289	4.55909	3.94785	2.66318
ssc04520	Cellular Processes	Cellular community - eukaryotes	Adherens junction	0.298685	0.609223	ENSSSCG00000009300	WASF3	0.417374	-1.26059	0.000937209	0.03366	down	yes	4.03777	1.52008	3.0152	8.39921	7.87603	4.26522
ssc04216	Cellular Processes	Cell growth and death	Ferroptosis	0.306939	0.621128	ENSSSCG00000036246	GP91-PHOX	0.200829	-2.31596	4.81254e-17	1.14077e-13	down	yes	1.41299	0.869504	1.42653	7.58359	6.22046	4.66449
ssc04216	Cellular Processes	Cell growth and death	Ferroptosis	0.306939	0.621128	ENSSSCG00000007287	GSS	2.15912	1.11044	0.000783454	0.0295571	up	yes	14.4623	8.47896	4.55779	3.78827	4.24754	4.70044
ssc04975	Organismal Systems	Digestive system	Fat digestion and absorption	0.316786	0.628974	ENSSSCG00000005423	ABCA1	0.362746	-1.46297	5.17091e-15	7.6607e-12	down	yes	2.2119	1.97877	1.8457	6.26204	5.26821	5.1105
ssc04975	Organismal Systems	Digestive system	Fat digestion and absorption	0.316786	0.628974	ENSSSCG00000015405	ENSSSCG00000015405	0.285037	-1.81078	4.64856e-09	1.46919e-06	down	yes	2.24569	1.27234	1.56819	6.5817	6.48757	4.7748
ssc05224	Human Diseases	Cancer: specific types	Breast cancer	0.319678	0.628974	ENSSSCG00000035524	WNT9B	0.0878802	-3.50832	1.07095e-20	5.07714e-17	down	yes	0.08171	0.088024	0.11439	1.22233	0.961308	1.04944
ssc05224	Human Diseases	Cancer: specific types	Breast cancer	0.319678	0.628974	ENSSSCG00000035249	GADD45G	2.50964	1.32748	1.97273e-12	1.29893e-09	up	yes	138.309	123.41	124.43	59.6796	57.9817	36.2047
ssc05224	Human Diseases	Cancer: specific types	Breast cancer	0.319678	0.628974	ENSSSCG00000031912	JUN	2.12853	1.08985	7.09926e-07	0.000121065	up	yes	146.559	238.531	232.136	108.009	103.724	78.2458
ssc05224	Human Diseases	Cancer: specific types	Breast cancer	0.319678	0.628974	ENSSSCG00000039841	SHC3	0.0303958	-5.03999	0.000150148	0.00883263	down	yes	0	0	0.0177165	0.192635	0.123226	0.267002
ssc05224	Human Diseases	Cancer: specific types	Breast cancer	0.319678	0.628974	ENSSSCG00000002383	FOS	2.65249	1.40735	0.000341806	0.0164344	up	yes	51.7257	134.672	160.001	61.4612	50.8367	18.2962
ssc05220	Human Diseases	Cancer: specific types	Chronic myeloid leukemia	0.320605	0.628974	ENSSSCG00000035249	GADD45G	2.50964	1.32748	1.97273e-12	1.29893e-09	up	yes	138.309	123.41	124.43	59.6796	57.9817	36.2047
ssc05220	Human Diseases	Cancer: specific types	Chronic myeloid leukemia	0.320605	0.628974	ENSSSCG00000039841	SHC3	0.0303958	-5.03999	0.000150148	0.00883263	down	yes	0	0	0.0177165	0.192635	0.123226	0.267002
ssc05220	Human Diseases	Cancer: specific types	Chronic myeloid leukemia	0.320605	0.628974	ENSSSCG00000035537	RUNX1	0.47027	-1.08844	0.00118562	0.0404374	down	yes	0.761275	0.845569	0.951095	2.4498	1.82238	1.16712
ssc05412	Human Diseases	Cardiovascular disease	Arrhythmogenic right ventricular cardiomyopathy	0.320605	0.628974	ENSSSCG00000041764	CACNA1C	0.417116	-1.26148	0.000233939	0.0122413	down	yes	0.652194	0.690959	0.533839	1.75916	1.81219	0.928585
ssc05412	Human Diseases	Cardiovascular disease	Arrhythmogenic right ventricular cardiomyopathy	0.320605	0.628974	ENSSSCG00000034767	LAMA1	10.9754	3.4562	0.000363827	0.0170438	up	yes	0.069928	0.115821	0.066322	0.010591	0.012376	0
ssc05412	Human Diseases	Cardiovascular disease	Arrhythmogenic right ventricular cardiomyopathy	0.320605	0.628974	ENSSSCG00000063008	ITGA2B	0.325185	-1.62067	0.00150106	0.0486746	down	yes	1.49931	0.648918	1.18789	4.51148	4.56509	1.18256
ssc04931	Human Diseases	Endocrine and metabolic disease	Insulin resistance	0.33423	0.648239	ENSSSCG00000012880	CPT1A	0.328307	-1.60688	3.77987e-10	1.59997e-07	down	yes	6.63109	5.29289	6.21136	23.2543	20.0516	11.9332
ssc04931	Human Diseases	Endocrine and metabolic disease	Insulin resistance	0.33423	0.648239	ENSSSCG00000015405	ENSSSCG00000015405	0.285037	-1.81078	4.64856e-09	1.46919e-06	down	yes	2.24569	1.27234	1.56819	6.5817	6.48757	4.7748
ssc04931	Human Diseases	Endocrine and metabolic disease	Insulin resistance	0.33423	0.648239	ENSSSCG00000003558	RPS6KA1	0.362549	-1.46375	7.4794e-09	2.11062e-06	down	yes	1.5968	0.916633	1.21914	3.78318	3.57171	2.9405
ssc04931	Human Diseases	Endocrine and metabolic disease	Insulin resistance	0.33423	0.648239	ENSSSCG00000016450	NOS3	0.432766	-1.20834	0.000155416	0.00902937	down	yes	19.8828	15.445	15.7595	51.4707	45.3423	21.2353
ssc04261	Organismal Systems	Circulatory system	Adrenergic signaling in cardiomyocytes	0.33547	0.648239	ENSSSCG00000006391	ATP1A2	0.41596	-1.26548	1.27357e-05	0.00129875	down	yes	0.720325	0.890562	0.655964	2.03469	1.67091	1.74409
ssc04261	Organismal Systems	Circulatory system	Adrenergic signaling in cardiomyocytes	0.33547	0.648239	ENSSSCG00000017991	PIK3R5	0.434454	-1.20272	1.8338e-05	0.00173181	down	yes	1.1792	0.846518	1.06752	2.17675	2.86488	2.07819
ssc04261	Organismal Systems	Circulatory system	Adrenergic signaling in cardiomyocytes	0.33547	0.648239	ENSSSCG00000017951	ATP1B2	0.45804	-1.12646	5.14125e-05	0.00384442	down	yes	2.02642	1.5372	1.39938	3.37284	3.7959	3.66657
ssc04261	Organismal Systems	Circulatory system	Adrenergic signaling in cardiomyocytes	0.33547	0.648239	ENSSSCG00000039535	CAMK2B	0.0501412	-4.31786	0.00011841	0.0073067	down	yes	0.0813007	0	0.049531	1.51878	1.04571	0.0447753
ssc04261	Organismal Systems	Circulatory system	Adrenergic signaling in cardiomyocytes	0.33547	0.648239	ENSSSCG00000041764	CACNA1C	0.417116	-1.26148	0.000233939	0.0122413	down	yes	0.652194	0.690959	0.533839	1.75916	1.81219	0.928585
ssc04340	Environmental Information Processing	Signal transduction	Hedgehog signaling pathway	0.346114	0.663815	ENSSSCG00000014852	ARRB1	0.409585	-1.28776	4.25724e-10	1.73989e-07	down	yes	4.0559	2.85499	3.12716	9.11295	8.37177	7.02312
ssc04340	Environmental Information Processing	Signal transduction	Hedgehog signaling pathway	0.346114	0.663815	ENSSSCG00000038694	CCND2	2.82238	1.49691	3.51989e-06	0.000482286	up	yes	2.2395	2.26468	1.56766	0.690152	0.583219	0.877948
ssc04934	Human Diseases	Endocrine and metabolic disease	Cushing syndrome	0.35133	0.668828	ENSSSCG00000035524	WNT9B	0.0878802	-3.50832	1.07095e-20	5.07714e-17	down	yes	0.08171	0.088024	0.11439	1.22233	0.961308	1.04944
ssc04934	Human Diseases	Endocrine and metabolic disease	Cushing syndrome	0.35133	0.668828	ENSSSCG00000039535	CAMK2B	0.0501412	-4.31786	0.00011841	0.0073067	down	yes	0.0813007	0	0.049531	1.51878	1.04571	0.0447753
ssc04934	Human Diseases	Endocrine and metabolic disease	Cushing syndrome	0.35133	0.668828	ENSSSCG00000041764	CACNA1C	0.417116	-1.26148	0.000233939	0.0122413	down	yes	0.652194	0.690959	0.533839	1.75916	1.81219	0.928585
ssc04934	Human Diseases	Endocrine and metabolic disease	Cushing syndrome	0.35133	0.668828	ENSSSCG00000023324	KMT2A	0.452616	-1.14364	0.00035746	0.0168454	down	yes	2.53814	1.75899	2.06848	6.04121	5.38874	2.63409
ssc04934	Human Diseases	Endocrine and metabolic disease	Cushing syndrome	0.35133	0.668828	ENSSSCG00000006095	CCNE2	0.430658	-1.21539	0.000745772	0.0287444	down	yes	1.26223	1.7483	2.01328	4.72691	4.49502	2.4435
ssc04935	Organismal Systems	Endocrine system	Growth hormone synthesis, secretion and action	0.364561	0.674184	ENSSSCG00000039841	SHC3	0.0303958	-5.03999	0.000150148	0.00883263	down	yes	0	0	0.0177165	0.192635	0.123226	0.267002
ssc04935	Organismal Systems	Endocrine system	Growth hormone synthesis, secretion and action	0.364561	0.674184	ENSSSCG00000041764	CACNA1C	0.417116	-1.26148	0.000233939	0.0122413	down	yes	0.652194	0.690959	0.533839	1.75916	1.81219	0.928585
ssc04935	Organismal Systems	Endocrine system	Growth hormone synthesis, secretion and action	0.364561	0.674184	ENSSSCG00000002383	FOS	2.65249	1.40735	0.000341806	0.0164344	up	yes	51.7257	134.672	160.001	61.4612	50.8367	18.2962
ssc04935	Organismal Systems	Endocrine system	Growth hormone synthesis, secretion and action	0.364561	0.674184	ENSSSCG00000011996	POU1F1	0.0015302	-9.35206	0.00112511	0.039133	down	yes	0	0	0	0.0558665	0.0395087	0.100677
ssc00520	Metabolism	Carbohydrate metabolism	Amino sugar and nucleotide sugar metabolism	0.36544	0.674184	ENSSSCG00000023706	CHIA	2742.8	11.4214	0.000220409	0.0117989	up	yes	0.720124	0.077848	0.024868	0	0	0
ssc00520	Metabolism	Carbohydrate metabolism	Amino sugar and nucleotide sugar metabolism	0.36544	0.674184	ENSSSCG00000014048	HK3	0.44934	-1.15412	0.00117174	0.0400821	down	yes	3.2522	2.97804	4.95353	10.3246	9.83361	4.73113
ssc04930	Human Diseases	Endocrine and metabolic disease	Type II diabetes mellitus	0.36544	0.674184	ENSSSCG00000041764	CACNA1C	0.417116	-1.26148	0.000233939	0.0122413	down	yes	0.652194	0.690959	0.533839	1.75916	1.81219	0.928585
ssc04930	Human Diseases	Endocrine and metabolic disease	Type II diabetes mellitus	0.36544	0.674184	ENSSSCG00000014048	HK3	0.44934	-1.15412	0.00117174	0.0400821	down	yes	3.2522	2.97804	4.95353	10.3246	9.83361	4.73113
ssc04932	Human Diseases	Endocrine and metabolic disease	Non-alcoholic fatty liver disease	0.367229	0.674184	ENSSSCG00000025188	LEPR	0.0791261	-3.6597	1.14459e-07	2.60878e-05	down	yes	0.0386506	0.00801101	0.0293131	0.470512	0.353102	0.136558
ssc04932	Human Diseases	Endocrine and metabolic disease	Non-alcoholic fatty liver disease	0.367229	0.674184	ENSSSCG00000031912	JUN	2.12853	1.08985	7.09926e-07	0.000121065	up	yes	146.559	238.531	232.136	108.009	103.724	78.2458
ssc04932	Human Diseases	Endocrine and metabolic disease	Non-alcoholic fatty liver disease	0.367229	0.674184	ENSSSCG00000039214	ENSSSCG00000039214	0.0285872	-5.12849	6.6841e-05	0.00472955	down	yes	0.071811	0	0	1.28911	1.08481	0.138086
ssc04932	Human Diseases	Endocrine and metabolic disease	Non-alcoholic fatty liver disease	0.367229	0.674184	ENSSSCG00000002383	FOS	2.65249	1.40735	0.000341806	0.0164344	up	yes	51.7257	134.672	160.001	61.4612	50.8367	18.2962
ssc04932	Human Diseases	Endocrine and metabolic disease	Non-alcoholic fatty liver disease	0.367229	0.674184	ENSSSCG00000008090	IL1A	0.0874798	-3.51491	0.000343591	0.0164868	down	yes	0	0.138294	0.158153	1.4831	1.47258	0.433082
ssc01210	Metabolism	Global and overview maps	2-Oxocarboxylic acid metabolism	0.36726	0.674184	ENSSSCG00000029163	BCAT1	0.482346	-1.05186	0.000574151	0.0236909	down	yes	0.589561	0.638057	1.03372	1.77002	1.54194	1.37624
ssc04722	Organismal Systems	Nervous system	Neurotrophin signaling pathway	0.37669	0.68659	ENSSSCG00000003558	RPS6KA1	0.362549	-1.46375	7.4794e-09	2.11062e-06	down	yes	1.5968	0.916633	1.21914	3.78318	3.57171	2.9405
ssc04722	Organismal Systems	Nervous system	Neurotrophin signaling pathway	0.37669	0.68659	ENSSSCG00000031912	JUN	2.12853	1.08985	7.09926e-07	0.000121065	up	yes	146.559	238.531	232.136	108.009	103.724	78.2458
ssc04722	Organismal Systems	Nervous system	Neurotrophin signaling pathway	0.37669	0.68659	ENSSSCG00000039535	CAMK2B	0.0501412	-4.31786	0.00011841	0.0073067	down	yes	0.0813007	0	0.049531	1.51878	1.04571	0.0447753
ssc04722	Organismal Systems	Nervous system	Neurotrophin signaling pathway	0.37669	0.68659	ENSSSCG00000039841	SHC3	0.0303958	-5.03999	0.000150148	0.00883263	down	yes	0	0	0.0177165	0.192635	0.123226	0.267002
ssc00531	Metabolism	Glycan biosynthesis and metabolism	Glycosaminoglycan degradation	0.384087	0.689255	ENSSSCG00000009237	HPSE	0.131385	-2.92812	5.78051e-05	0.0041974	down	yes	0.281513	0.09177	0.17424	2.19033	1.71377	0.263206
ssc04961	Organismal Systems	Excretory system	Endocrine and other factor-regulated calcium reabsorption	0.384546	0.689255	ENSSSCG00000006391	ATP1A2	0.41596	-1.26548	1.27357e-05	0.00129875	down	yes	0.720325	0.890562	0.655964	2.03469	1.67091	1.74409
ssc04961	Organismal Systems	Excretory system	Endocrine and other factor-regulated calcium reabsorption	0.384546	0.689255	ENSSSCG00000017951	ATP1B2	0.45804	-1.12646	5.14125e-05	0.00384442	down	yes	2.02642	1.5372	1.39938	3.37284	3.7959	3.66657
ssc04658	Organismal Systems	Immune system	Th1 and Th2 cell differentiation	0.386198	0.689255	ENSSSCG00000012397	IL2RG	0.298773	-1.74288	1.05221e-11	5.80037e-09	down	yes	4.1612	2.96118	4.3484	15.2717	12.9891	10.1322
ssc04658	Organismal Systems	Immune system	Th1 and Th2 cell differentiation	0.386198	0.689255	ENSSSCG00000031912	JUN	2.12853	1.08985	7.09926e-07	0.000121065	up	yes	146.559	238.531	232.136	108.009	103.724	78.2458
ssc04658	Organismal Systems	Immune system	Th1 and Th2 cell differentiation	0.386198	0.689255	ENSSSCG00000002383	FOS	2.65249	1.40735	0.000341806	0.0164344	up	yes	51.7257	134.672	160.001	61.4612	50.8367	18.2962
ssc02010	Environmental Information Processing	Membrane transport	ABC transporters	0.394006	0.698342	ENSSSCG00000005423	ABCA1	0.362746	-1.46297	5.17091e-15	7.6607e-12	down	yes	2.2119	1.97877	1.8457	6.26204	5.26821	5.1105
ssc02010	Environmental Information Processing	Membrane transport	ABC transporters	0.394006	0.698342	ENSSSCG00000006890	ABCA4	0.369488	-1.4364	0.0011445	0.0395319	down	yes	1.48541	0.399216	1.44259	2.8361	2.47373	3.69512
ssc04152	Environmental Information Processing	Signal transduction	AMPK signaling pathway	0.400877	0.703372	ENSSSCG00000012880	CPT1A	0.328307	-1.60688	3.77987e-10	1.59997e-07	down	yes	6.63109	5.29289	6.21136	23.2543	20.0516	11.9332
ssc04152	Environmental Information Processing	Signal transduction	AMPK signaling pathway	0.400877	0.703372	ENSSSCG00000015405	ENSSSCG00000015405	0.285037	-1.81078	4.64856e-09	1.46919e-06	down	yes	2.24569	1.27234	1.56819	6.5817	6.48757	4.7748
ssc04152	Environmental Information Processing	Signal transduction	AMPK signaling pathway	0.400877	0.703372	ENSSSCG00000025188	LEPR	0.0791261	-3.6597	1.14459e-07	2.60878e-05	down	yes	0.0386506	0.00801101	0.0293131	0.470512	0.353102	0.136558
ssc04152	Environmental Information Processing	Signal transduction	AMPK signaling pathway	0.400877	0.703372	ENSSSCG00000009245	SCD5	0.410423	-1.28482	8.84037e-06	0.000979215	down	yes	1.22876	1.08594	0.982728	2.97511	2.62671	2.4324
ssc04978	Organismal Systems	Digestive system	Mineral absorption	0.403401	0.703372	ENSSSCG00000006391	ATP1A2	0.41596	-1.26548	1.27357e-05	0.00129875	down	yes	0.720325	0.890562	0.655964	2.03469	1.67091	1.74409
ssc04978	Organismal Systems	Digestive system	Mineral absorption	0.403401	0.703372	ENSSSCG00000017951	ATP1B2	0.45804	-1.12646	5.14125e-05	0.00384442	down	yes	2.02642	1.5372	1.39938	3.37284	3.7959	3.66657
ssc04912	Organismal Systems	Endocrine system	GnRH signaling pathway	0.407791	0.703372	ENSSSCG00000031912	JUN	2.12853	1.08985	7.09926e-07	0.000121065	up	yes	146.559	238.531	232.136	108.009	103.724	78.2458
ssc04912	Organismal Systems	Endocrine system	GnRH signaling pathway	0.407791	0.703372	ENSSSCG00000039535	CAMK2B	0.0501412	-4.31786	0.00011841	0.0073067	down	yes	0.0813007	0	0.049531	1.51878	1.04571	0.0447753
ssc04912	Organismal Systems	Endocrine system	GnRH signaling pathway	0.407791	0.703372	ENSSSCG00000041764	CACNA1C	0.417116	-1.26148	0.000233939	0.0122413	down	yes	0.652194	0.690959	0.533839	1.75916	1.81219	0.928585
ssc04260	Organismal Systems	Circulatory system	Cardiac muscle contraction	0.407791	0.703372	ENSSSCG00000006391	ATP1A2	0.41596	-1.26548	1.27357e-05	0.00129875	down	yes	0.720325	0.890562	0.655964	2.03469	1.67091	1.74409
ssc04260	Organismal Systems	Circulatory system	Cardiac muscle contraction	0.407791	0.703372	ENSSSCG00000017951	ATP1B2	0.45804	-1.12646	5.14125e-05	0.00384442	down	yes	2.02642	1.5372	1.39938	3.37284	3.7959	3.66657
ssc04260	Organismal Systems	Circulatory system	Cardiac muscle contraction	0.407791	0.703372	ENSSSCG00000041764	CACNA1C	0.417116	-1.26148	0.000233939	0.0122413	down	yes	0.652194	0.690959	0.533839	1.75916	1.81219	0.928585
ssc04621	Organismal Systems	Immune system	NOD-like receptor signaling pathway	0.414902	0.704072	ENSSSCG00000036246	GP91-PHOX	0.200829	-2.31596	4.81254e-17	1.14077e-13	down	yes	1.41299	0.869504	1.42653	7.58359	6.22046	4.66449
ssc04621	Organismal Systems	Immune system	NOD-like receptor signaling pathway	0.414902	0.704072	ENSSSCG00000031912	JUN	2.12853	1.08985	7.09926e-07	0.000121065	up	yes	146.559	238.531	232.136	108.009	103.724	78.2458
ssc04621	Organismal Systems	Immune system	NOD-like receptor signaling pathway	0.414902	0.704072	ENSSSCG00000031493	CYBA	0.484405	-1.04571	6.1941e-06	0.000744135	down	yes	18.5076	12.3092	16.8515	34.3191	35.7459	28.3407
ssc04621	Organismal Systems	Immune system	NOD-like receptor signaling pathway	0.414902	0.704072	ENSSSCG00000005503	TLR4	0.48183	-1.0534	4.41424e-05	0.00341945	down	yes	1.89913	1.43729	1.84978	4.41603	3.74549	2.60203
ssc04621	Organismal Systems	Immune system	NOD-like receptor signaling pathway	0.414902	0.704072	ENSSSCG00000039214	ENSSSCG00000039214	0.0285872	-5.12849	6.6841e-05	0.00472955	down	yes	0.071811	0	0	1.28911	1.08481	0.138086
ssc04614	Organismal Systems	Endocrine system	Renin-angiotensin system	0.416416	0.704072	ENSSSCG00000009132	ENPEP	0.467066	-1.0983	2.50468e-05	0.00220631	down	yes	4.83507	3.06616	4.38415	7.81455	8.59633	9.89245
ssc00532	Metabolism	Glycan biosynthesis and metabolism	Glycosaminoglycan biosynthesis - chondroitin sulfate / dermatan sulfate	0.416416	0.704072	ENSSSCG00000007872	XYLT1	0.391913	-1.3514	0.00138045	0.0455741	down	yes	0.219359	0.328482	0.353648	1.07942	0.768617	0.45219
ssc05210	Human Diseases	Cancer: specific types	Colorectal cancer	0.422063	0.708956	ENSSSCG00000035249	GADD45G	2.50964	1.32748	1.97273e-12	1.29893e-09	up	yes	138.309	123.41	124.43	59.6796	57.9817	36.2047
ssc05210	Human Diseases	Cancer: specific types	Colorectal cancer	0.422063	0.708956	ENSSSCG00000031912	JUN	2.12853	1.08985	7.09926e-07	0.000121065	up	yes	146.559	238.531	232.136	108.009	103.724	78.2458
ssc05210	Human Diseases	Cancer: specific types	Colorectal cancer	0.422063	0.708956	ENSSSCG00000002383	FOS	2.65249	1.40735	0.000341806	0.0164344	up	yes	51.7257	134.672	160.001	61.4612	50.8367	18.2962
ssc04530	Cellular Processes	Cellular community - eukaryotes	Tight junction	0.425442	0.709991	ENSSSCG00000025644	ENSSSCG00000025644	0.223207	-2.16355	2.52487e-07	5.13213e-05	down	yes	0.794442	1.23491	0.618127	2.56196	3.90426	5.39491
ssc04530	Cellular Processes	Cellular community - eukaryotes	Tight junction	0.425442	0.709991	ENSSSCG00000031912	JUN	2.12853	1.08985	7.09926e-07	0.000121065	up	yes	146.559	238.531	232.136	108.009	103.724	78.2458
ssc04530	Cellular Processes	Cellular community - eukaryotes	Tight junction	0.425442	0.709991	ENSSSCG00000017934	CLDN7	3.10308	1.6337	2.03408e-05	0.00189082	up	yes	4.48926	6.32532	2.83327	1.18991	1.46911	1.73915
ssc04530	Cellular Processes	Cellular community - eukaryotes	Tight junction	0.425442	0.709991	ENSSSCG00000016959	MARVELD2	0.273117	-1.87241	2.84112e-05	0.00241383	down	yes	0.353027	0.19575	0.52843	0.962643	1.65106	1.33041
ssc04530	Cellular Processes	Cellular community - eukaryotes	Tight junction	0.425442	0.709991	ENSSSCG00000035537	RUNX1	0.47027	-1.08844	0.00118562	0.0404374	down	yes	0.761275	0.845569	0.951095	2.4498	1.82238	1.16712
ssc00230	Metabolism	Nucleotide metabolism	Purine metabolism	0.430874	0.711596	ENSSSCG00000022492	AMPD3	0.204089	-2.29273	7.70366e-10	2.94528e-07	down	yes	0.368515	0.183022	0.300272	1.61845	1.68894	0.866314
ssc00230	Metabolism	Nucleotide metabolism	Purine metabolism	0.430874	0.711596	ENSSSCG00000025345	GUCY2D	0.358857	-1.47852	0.00072414	0.0280474	down	yes	0.681588	0.300543	0.320806	1.27504	1.29181	1.06395
ssc00230	Metabolism	Nucleotide metabolism	Purine metabolism	0.430874	0.711596	ENSSSCG00000035218	ADA2	0.291284	-1.7795	0.00108063	0.0378924	down	yes	2.58238	0.379381	0.940361	4.64082	4.51125	4.24421
ssc00230	Metabolism	Nucleotide metabolism	Purine metabolism	0.430874	0.711596	ENSSSCG00000055915	ENSSSCG00000055915	4.46262	2.15789	0.00152979	0.0490691	up	yes	0.208798	0.468566	0.528721	0.058469	0.080233	0.131562
ssc00770	Metabolism	Metabolism of cofactors and vitamins	Pantothenate and CoA biosynthesis	0.431942	0.711596	ENSSSCG00000029163	BCAT1	0.482346	-1.05186	0.000574151	0.0236909	down	yes	0.589561	0.638057	1.03372	1.77002	1.54194	1.37624
ssc04727	Organismal Systems	Nervous system	GABAergic synapse	0.436219	0.714066	ENSSSCG00000007437	SLC12A5	3.11286	1.63824	8.94277e-07	0.000148237	up	yes	1.25544	2.4671	2.28092	0.899375	0.589817	0.439407
ssc04727	Organismal Systems	Nervous system	GABAergic synapse	0.436219	0.714066	ENSSSCG00000007909	ABAT	0.293793	-1.76713	9.8396e-06	0.0010699	down	yes	1.05185	0.934704	0.686973	3.95648	3.7526	1.39096
ssc04727	Organismal Systems	Nervous system	GABAergic synapse	0.436219	0.714066	ENSSSCG00000041764	CACNA1C	0.417116	-1.26148	0.000233939	0.0122413	down	yes	0.652194	0.690959	0.533839	1.75916	1.81219	0.928585
ssc01212	Metabolism	Global and overview maps	Fatty acid metabolism	0.440257	0.716115	ENSSSCG00000012880	CPT1A	0.328307	-1.60688	3.77987e-10	1.59997e-07	down	yes	6.63109	5.29289	6.21136	23.2543	20.0516	11.9332
ssc01212	Metabolism	Global and overview maps	Fatty acid metabolism	0.440257	0.716115	ENSSSCG00000009245	SCD5	0.410423	-1.28482	8.84037e-06	0.000979215	down	yes	1.22876	1.08594	0.982728	2.97511	2.62671	2.4324
ssc05310	Human Diseases	Immune disease	Asthma	0.447056	0.716227	ENSSSCG00000006357	FCER1G	0.444342	-1.17026	0.00142656	0.046706	down	yes	26.3364	10.6467	21.8834	58.2995	44.452	29.7286
ssc04015	Environmental Information Processing	Signal transduction	Rap1 signaling pathway	0.448629	0.716227	ENSSSCG00000014441	CSF1R	0.267402	-1.90292	5.30672e-09	1.61802e-06	down	yes	12.3228	4.42678	8.77211	36.1176	33.7569	25.5687
ssc04015	Environmental Information Processing	Signal transduction	Rap1 signaling pathway	0.448629	0.716227	ENSSSCG00000013553	VAV1	0.288444	-1.79363	3.42588e-08	8.28644e-06	down	yes	1.22791	0.625221	1.31869	4.30399	3.77463	2.91766
ssc04015	Environmental Information Processing	Signal transduction	Rap1 signaling pathway	0.448629	0.716227	ENSSSCG00000025133	ITGB2	0.381078	-1.39184	2.91286e-07	5.70633e-05	down	yes	2.92941	1.79459	2.96807	5.92198	6.52439	7.73865
ssc04015	Environmental Information Processing	Signal transduction	Rap1 signaling pathway	0.448629	0.716227	ENSSSCG00000058656	P2RY1	0.47941	-1.06067	5.76827e-05	0.0041974	down	yes	1.13993	0.940842	0.929237	2.39379	2.06599	1.8188
ssc04015	Environmental Information Processing	Signal transduction	Rap1 signaling pathway	0.448629	0.716227	ENSSSCG00000017006	LCP2	0.344998	-1.53534	0.000108824	0.00682426	down	yes	1.09894	0.846338	1.38263	4.3203	3.84813	1.47774
ssc04015	Environmental Information Processing	Signal transduction	Rap1 signaling pathway	0.448629	0.716227	ENSSSCG00000063008	ITGA2B	0.325185	-1.62067	0.00150106	0.0486746	down	yes	1.49931	0.648918	1.18789	4.51148	4.56509	1.18256
ssc04068	Environmental Information Processing	Signal transduction	FoxO signaling pathway	0.448687	0.716227	ENSSSCG00000035249	GADD45G	2.50964	1.32748	1.97273e-12	1.29893e-09	up	yes	138.309	123.41	124.43	59.6796	57.9817	36.2047
ssc04068	Environmental Information Processing	Signal transduction	FoxO signaling pathway	0.448687	0.716227	ENSSSCG00000038694	CCND2	2.82238	1.49691	3.51989e-06	0.000482286	up	yes	2.2395	2.26468	1.56766	0.690152	0.583219	0.877948
ssc04068	Environmental Information Processing	Signal transduction	FoxO signaling pathway	0.448687	0.716227	ENSSSCG00000035074	FOXO6	1271.7	10.3125	2.20732e-05	0.002028	up	yes	0.160513	0.112678	0.108318	0	0	0
ssc04068	Environmental Information Processing	Signal transduction	FoxO signaling pathway	0.448687	0.716227	ENSSSCG00000038732	AGAP2	0.445424	-1.16675	2.22831e-05	0.00203938	down	yes	2.04785	1.24742	2.01114	3.68855	4.23489	3.98972
ssc05165	Human Diseases	Infectious disease: viral	Human papillomavirus infection	0.455271	0.72225	ENSSSCG00000035524	WNT9B	0.0878802	-3.50832	1.07095e-20	5.07714e-17	down	yes	0.08171	0.088024	0.11439	1.22233	0.961308	1.04944
ssc05165	Human Diseases	Infectious disease: viral	Human papillomavirus infection	0.455271	0.72225	ENSSSCG00000009216	SPP1	0.137138	-2.8663	6.63822e-16	1.2104e-12	down	yes	9.85735	26.3966	17.2624	122.618	126.493	141.128
ssc05165	Human Diseases	Infectious disease: viral	Human papillomavirus infection	0.455271	0.72225	ENSSSCG00000052432	ENSSSCG00000052432	0.352776	-1.50318	6.48008e-07	0.000112119	down	yes	243.665	117.407	228.564	668.892	616.582	385.948
ssc05165	Human Diseases	Infectious disease: viral	Human papillomavirus infection	0.455271	0.72225	ENSSSCG00000038694	CCND2	2.82238	1.49691	3.51989e-06	0.000482286	up	yes	2.2395	2.26468	1.56766	0.690152	0.583219	0.877948
ssc05165	Human Diseases	Infectious disease: viral	Human papillomavirus infection	0.455271	0.72225	ENSSSCG00000015556	LAMC2	0.383146	-1.38403	2.49125e-05	0.00220345	down	yes	4.45587	5.68009	5.54977	17.6243	15.8388	7.47622
ssc05165	Human Diseases	Infectious disease: viral	Human papillomavirus infection	0.455271	0.72225	ENSSSCG00000001229	ENSSSCG00000001229	0.42378	-1.23861	7.47488e-05	0.00511122	down	yes	92.9244	55.0207	64.4142	218.512	183.604	98.9914
ssc05165	Human Diseases	Infectious disease: viral	Human papillomavirus infection	0.455271	0.72225	ENSSSCG00000034767	LAMA1	10.9754	3.4562	0.000363827	0.0170438	up	yes	0.069928	0.115821	0.066322	0.010591	0.012376	0
ssc05165	Human Diseases	Infectious disease: viral	Human papillomavirus infection	0.455271	0.72225	ENSSSCG00000006095	CCNE2	0.430658	-1.21539	0.000745772	0.0287444	down	yes	1.26223	1.7483	2.01328	4.72691	4.49502	2.4435
ssc05165	Human Diseases	Infectious disease: viral	Human papillomavirus infection	0.455271	0.72225	ENSSSCG00000063008	ITGA2B	0.325185	-1.62067	0.00150106	0.0486746	down	yes	1.49931	0.648918	1.18789	4.51148	4.56509	1.18256
ssc00534	Metabolism	Glycan biosynthesis and metabolism	Glycosaminoglycan biosynthesis - heparan sulfate / heparin	0.46177	0.728067	ENSSSCG00000007872	XYLT1	0.391913	-1.3514	0.00138045	0.0455741	down	yes	0.219359	0.328482	0.353648	1.07942	0.768617	0.45219
ssc05215	Human Diseases	Cancer: specific types	Prostate cancer	0.471015	0.733642	ENSSSCG00000007032	PLAT	0.3529	-1.50267	7.32948e-13	5.10994e-10	down	yes	14.0966	15.9588	15.708	50.3654	45.4785	33.8341
ssc05215	Human Diseases	Cancer: specific types	Prostate cancer	0.471015	0.733642	ENSSSCG00000007436	MMP9	0.112103	-3.1571	0.000519315	0.0219036	down	yes	0.544271	0.755057	2.65784	5.2783	8.88265	21.1384
ssc05215	Human Diseases	Cancer: specific types	Prostate cancer	0.471015	0.733642	ENSSSCG00000006095	CCNE2	0.430658	-1.21539	0.000745772	0.0287444	down	yes	1.26223	1.7483	2.01328	4.72691	4.49502	2.4435
ssc05231	Human Diseases	Cancer: overview	Choline metabolism in cancer	0.471015	0.733642	ENSSSCG00000031912	JUN	2.12853	1.08985	7.09926e-07	0.000121065	up	yes	146.559	238.531	232.136	108.009	103.724	78.2458
ssc05231	Human Diseases	Cancer: overview	Choline metabolism in cancer	0.471015	0.733642	ENSSSCG00000002383	FOS	2.65249	1.40735	0.000341806	0.0164344	up	yes	51.7257	134.672	160.001	61.4612	50.8367	18.2962
ssc05231	Human Diseases	Cancer: overview	Choline metabolism in cancer	0.471015	0.733642	ENSSSCG00000009300	WASF3	0.417374	-1.26059	0.000937209	0.03366	down	yes	4.03777	1.52008	3.0152	8.39921	7.87603	4.26522
ssc04623	Organismal Systems	Immune system	Cytosolic DNA-sensing pathway	0.47584	0.736693	ENSSSCG00000039214	ENSSSCG00000039214	0.0285872	-5.12849	6.6841e-05	0.00472955	down	yes	0.071811	0	0	1.28911	1.08481	0.138086
ssc04623	Organismal Systems	Immune system	Cytosolic DNA-sensing pathway	0.47584	0.736693	ENSSSCG00000032343	CCL4	0.25394	-1.97744	0.000233644	0.0122413	down	yes	0.728731	1.46798	1.59811	7.38512	5.40678	2.15188
ssc05217	Human Diseases	Cancer: specific types	Basal cell carcinoma	0.484522	0.745641	ENSSSCG00000035524	WNT9B	0.0878802	-3.50832	1.07095e-20	5.07714e-17	down	yes	0.08171	0.088024	0.11439	1.22233	0.961308	1.04944
ssc05217	Human Diseases	Cancer: specific types	Basal cell carcinoma	0.484522	0.745641	ENSSSCG00000035249	GADD45G	2.50964	1.32748	1.97273e-12	1.29893e-09	up	yes	138.309	123.41	124.43	59.6796	57.9817	36.2047
ssc04966	Organismal Systems	Excretory system	Collecting duct acid secretion	0.490039	0.747319	ENSSSCG00000006140	CA2	0.397894	-1.32955	0.00130042	0.0432329	down	yes	1.53221	0.538667	1.02071	2.33162	2.49577	2.94248
ssc04974	Organismal Systems	Digestive system	Protein digestion and absorption	0.491428	0.747319	ENSSSCG00000006391	ATP1A2	0.41596	-1.26548	1.27357e-05	0.00129875	down	yes	0.720325	0.890562	0.655964	2.03469	1.67091	1.74409
ssc04974	Organismal Systems	Digestive system	Protein digestion and absorption	0.491428	0.747319	ENSSSCG00000017951	ATP1B2	0.45804	-1.12646	5.14125e-05	0.00384442	down	yes	2.02642	1.5372	1.39938	3.37284	3.7959	3.66657
ssc04974	Organismal Systems	Digestive system	Protein digestion and absorption	0.491428	0.747319	ENSSSCG00000003069	KCNN4	0.0418916	-4.57719	0.000784314	0.0295571	down	yes	0	0.0479259	0	0.24044	0.190336	0.713268
ssc05168	Human Diseases	Infectious disease: viral	Herpes simplex virus 1 infection	0.496828	0.751087	ENSSSCG00000013551	C3	0.273533	-1.87021	4.05676e-13	3.19253e-10	down	yes	1.3987	1.41272	1.78552	4.82431	5.37869	6.60276
ssc05168	Human Diseases	Infectious disease: viral	Herpes simplex virus 1 infection	0.496828	0.751087	ENSSSCG00000009002	TLR2	0.261758	-1.9337	1.45329e-12	9.84254e-10	down	yes	0.242131	0.198378	0.235175	0.963629	0.920697	0.697003
ssc05168	Human Diseases	Infectious disease: viral	Herpes simplex virus 1 infection	0.496828	0.751087	ENSSSCG00000000884	APAF1	0.352906	-1.50264	6.00109e-07	0.00010537	down	yes	5.15605	6.92886	7.05755	23.5103	19.6224	11.1096
ssc05168	Human Diseases	Infectious disease: viral	Herpes simplex virus 1 infection	0.496828	0.751087	ENSSSCG00000052432	ENSSSCG00000052432	0.352776	-1.50318	6.48008e-07	0.000112119	down	yes	243.665	117.407	228.564	668.892	616.582	385.948
ssc05168	Human Diseases	Infectious disease: viral	Herpes simplex virus 1 infection	0.496828	0.751087	ENSSSCG00000037951	ZNF891	2.33835	1.22549	1.23754e-05	0.00126989	up	yes	2.06783	1.72002	2.22705	0.663116	0.77322	1.13595
ssc05168	Human Diseases	Infectious disease: viral	Herpes simplex virus 1 infection	0.496828	0.751087	ENSSSCG00000039214	ENSSSCG00000039214	0.0285872	-5.12849	6.6841e-05	0.00472955	down	yes	0.071811	0	0	1.28911	1.08481	0.138086
ssc05168	Human Diseases	Infectious disease: viral	Herpes simplex virus 1 infection	0.496828	0.751087	ENSSSCG00000001229	ENSSSCG00000001229	0.42378	-1.23861	7.47488e-05	0.00511122	down	yes	92.9244	55.0207	64.4142	218.512	183.604	98.9914
ssc05168	Human Diseases	Infectious disease: viral	Herpes simplex virus 1 infection	0.496828	0.751087	ENSSSCG00000002931	ZNF565	0.357659	-1.48334	0.000150162	0.00883263	down	yes	1.3513	1.14154	1.28365	4.72696	4.14731	1.68468
ssc05168	Human Diseases	Infectious disease: viral	Herpes simplex virus 1 infection	0.496828	0.751087	ENSSSCG00000003981	ZFP69B	0.468758	-1.09308	0.000227584	0.0120956	down	yes	2.9984	3.21518	3.85325	9.17748	7.68001	4.61804
ssc00650	Metabolism	Carbohydrate metabolism	Butanoate metabolism	0.503614	0.756894	ENSSSCG00000007909	ABAT	0.293793	-1.76713	9.8396e-06	0.0010699	down	yes	1.05185	0.934704	0.686973	3.95648	3.7526	1.39096
ssc04928	Organismal Systems	Endocrine system	Parathyroid hormone synthesis, secretion and action	0.524567	0.780774	ENSSSCG00000014852	ARRB1	0.409585	-1.28776	4.25724e-10	1.73989e-07	down	yes	4.0559	2.85499	3.12716	9.11295	8.37177	7.02312
ssc04928	Organismal Systems	Endocrine system	Parathyroid hormone synthesis, secretion and action	0.524567	0.780774	ENSSSCG00000002383	FOS	2.65249	1.40735	0.000341806	0.0164344	up	yes	51.7257	134.672	160.001	61.4612	50.8367	18.2962
ssc04928	Organismal Systems	Endocrine system	Parathyroid hormone synthesis, secretion and action	0.524567	0.780774	ENSSSCG00000058919	MAFB	0.452752	-1.14321	0.000470503	0.0206534	down	yes	5.84024	2.26771	4.87524	10.5729	9.87549	8.22776
ssc04392	Environmental Information Processing	Signal transduction	Hippo signaling pathway - multiple species	0.529695	0.780774	ENSSSCG00000026886	DCHS2	0.0568366	-4.13704	1.98995e-10	8.73516e-08	down	yes	0.01714	0.007618	0.014809	0.130359	0.253167	0.312628
ssc01040	Metabolism	Lipid metabolism	Biosynthesis of unsaturated fatty acids	0.529695	0.780774	ENSSSCG00000009245	SCD5	0.410423	-1.28482	8.84037e-06	0.000979215	down	yes	1.22876	1.08594	0.982728	2.97511	2.62671	2.4324
ssc05226	Human Diseases	Cancer: specific types	Gastric cancer	0.534621	0.780774	ENSSSCG00000035524	WNT9B	0.0878802	-3.50832	1.07095e-20	5.07714e-17	down	yes	0.08171	0.088024	0.11439	1.22233	0.961308	1.04944
ssc05226	Human Diseases	Cancer: specific types	Gastric cancer	0.534621	0.780774	ENSSSCG00000035249	GADD45G	2.50964	1.32748	1.97273e-12	1.29893e-09	up	yes	138.309	123.41	124.43	59.6796	57.9817	36.2047
ssc05226	Human Diseases	Cancer: specific types	Gastric cancer	0.534621	0.780774	ENSSSCG00000039841	SHC3	0.0303958	-5.03999	0.000150148	0.00883263	down	yes	0	0	0.0177165	0.192635	0.123226	0.267002
ssc05226	Human Diseases	Cancer: specific types	Gastric cancer	0.534621	0.780774	ENSSSCG00000006095	CCNE2	0.430658	-1.21539	0.000745772	0.0287444	down	yes	1.26223	1.7483	2.01328	4.72691	4.49502	2.4435
ssc04137	Cellular Processes	Transport and catabolism	Mitophagy - animal	0.534693	0.780774	ENSSSCG00000036352	RAB7B	0.211099	-2.24401	2.62719e-13	2.23924e-10	down	yes	0.533683	0.660679	0.64241	2.36503	3.20816	3.12778
ssc04137	Cellular Processes	Transport and catabolism	Mitophagy - animal	0.534693	0.780774	ENSSSCG00000031912	JUN	2.12853	1.08985	7.09926e-07	0.000121065	up	yes	146.559	238.531	232.136	108.009	103.724	78.2458
ssc04750	Organismal Systems	Sensory system	Inflammatory mediator regulation of TRP channels	0.543877	0.789697	ENSSSCG00000027024	ASIC3	2.54842	1.3496	3.15749e-05	0.00263539	up	yes	5.36008	8.67162	7.56299	4.66868	2.10435	1.70071
ssc04750	Organismal Systems	Sensory system	Inflammatory mediator regulation of TRP channels	0.543877	0.789697	ENSSSCG00000039214	ENSSSCG00000039214	0.0285872	-5.12849	6.6841e-05	0.00472955	down	yes	0.071811	0	0	1.28911	1.08481	0.138086
ssc04750	Organismal Systems	Sensory system	Inflammatory mediator regulation of TRP channels	0.543877	0.789697	ENSSSCG00000039535	CAMK2B	0.0501412	-4.31786	0.00011841	0.0073067	down	yes	0.0813007	0	0.049531	1.51878	1.04571	0.0447753
ssc04710	Organismal Systems	Environmental adaptation	Circadian rhythm	0.554412	0.797416	ENSSSCG00000013397	ARNTL	0.32737	-1.61101	4.90507e-06	0.000620432	down	yes	1.31697	1.18144	0.983143	2.98129	2.84111	4.81252
ssc01524	Human Diseases	Drug resistance: antineoplastic	Platinum drug resistance	0.558502	0.797416	ENSSSCG00000000884	APAF1	0.352906	-1.50264	6.00109e-07	0.00010537	down	yes	5.15605	6.92886	7.05755	23.5103	19.6224	11.1096
ssc01524	Human Diseases	Drug resistance: antineoplastic	Platinum drug resistance	0.558502	0.797416	ENSSSCG00000031736	MGST2	2.03303	1.02363	0.000243307	0.0125681	up	yes	15.4175	19.1406	16.8528	10.2348	10.5673	4.48566
ssc01230	Metabolism	Global and overview maps	Biosynthesis of amino acids	0.558502	0.797416	ENSSSCG00000029163	BCAT1	0.482346	-1.05186	0.000574151	0.0236909	down	yes	0.589561	0.638057	1.03372	1.77002	1.54194	1.37624
ssc01230	Metabolism	Global and overview maps	Biosynthesis of amino acids	0.558502	0.797416	ENSSSCG00000007748	PSPH	2.26805	1.18145	0.000825442	0.0306681	up	yes	9.42477	11.8839	13.4987	3.09206	3.96685	8.2879
ssc00052	Metabolism	Carbohydrate metabolism	Galactose metabolism	0.566281	0.804056	ENSSSCG00000014048	HK3	0.44934	-1.15412	0.00117174	0.0400821	down	yes	3.2522	2.97804	4.95353	10.3246	9.83361	4.73113
ssc04114	Cellular Processes	Cell growth and death	Oocyte meiosis	0.575033	0.807085	ENSSSCG00000003558	RPS6KA1	0.362549	-1.46375	7.4794e-09	2.11062e-06	down	yes	1.5968	0.916633	1.21914	3.78318	3.57171	2.9405
ssc04114	Cellular Processes	Cell growth and death	Oocyte meiosis	0.575033	0.807085	ENSSSCG00000039535	CAMK2B	0.0501412	-4.31786	0.00011841	0.0073067	down	yes	0.0813007	0	0.049531	1.51878	1.04571	0.0447753
ssc04114	Cellular Processes	Cell growth and death	Oocyte meiosis	0.575033	0.807085	ENSSSCG00000006095	CCNE2	0.430658	-1.21539	0.000745772	0.0287444	down	yes	1.26223	1.7483	2.01328	4.72691	4.49502	2.4435
ssc00410	Metabolism	Metabolism of other amino acids	beta-Alanine metabolism	0.577835	0.807085	ENSSSCG00000007909	ABAT	0.293793	-1.76713	9.8396e-06	0.0010699	down	yes	1.05185	0.934704	0.686973	3.95648	3.7526	1.39096
ssc00051	Metabolism	Carbohydrate metabolism	Fructose and mannose metabolism	0.577835	0.807085	ENSSSCG00000014048	HK3	0.44934	-1.15412	0.00117174	0.0400821	down	yes	3.2522	2.97804	4.95353	10.3246	9.83361	4.73113
ssc04918	Organismal Systems	Endocrine system	Thyroid hormone synthesis	0.581435	0.807723	ENSSSCG00000006391	ATP1A2	0.41596	-1.26548	1.27357e-05	0.00129875	down	yes	0.720325	0.890562	0.655964	2.03469	1.67091	1.74409
ssc04918	Organismal Systems	Endocrine system	Thyroid hormone synthesis	0.581435	0.807723	ENSSSCG00000017951	ATP1B2	0.45804	-1.12646	5.14125e-05	0.00384442	down	yes	2.02642	1.5372	1.39938	3.37284	3.7959	3.66657
ssc04215	Cellular Processes	Cell growth and death	Apoptosis - multiple species	0.589083	0.809595	ENSSSCG00000000884	APAF1	0.352906	-1.50264	6.00109e-07	0.00010537	down	yes	5.15605	6.92886	7.05755	23.5103	19.6224	11.1096
ssc00640	Metabolism	Carbohydrate metabolism	Propanoate metabolism	0.589083	0.809595	ENSSSCG00000007909	ABAT	0.293793	-1.76713	9.8396e-06	0.0010699	down	yes	1.05185	0.934704	0.686973	3.95648	3.7526	1.39096
ssc01523	Human Diseases	Drug resistance: antineoplastic	Antifolate resistance	0.600032	0.813201	ENSSSCG00000039214	ENSSSCG00000039214	0.0285872	-5.12849	6.6841e-05	0.00472955	down	yes	0.071811	0	0	1.28911	1.08481	0.138086
ssc05225	Human Diseases	Cancer: specific types	Hepatocellular carcinoma	0.603408	0.813201	ENSSSCG00000035524	WNT9B	0.0878802	-3.50832	1.07095e-20	5.07714e-17	down	yes	0.08171	0.088024	0.11439	1.22233	0.961308	1.04944
ssc05225	Human Diseases	Cancer: specific types	Hepatocellular carcinoma	0.603408	0.813201	ENSSSCG00000035249	GADD45G	2.50964	1.32748	1.97273e-12	1.29893e-09	up	yes	138.309	123.41	124.43	59.6796	57.9817	36.2047
ssc05225	Human Diseases	Cancer: specific types	Hepatocellular carcinoma	0.603408	0.813201	ENSSSCG00000039841	SHC3	0.0303958	-5.03999	0.000150148	0.00883263	down	yes	0	0	0.0177165	0.192635	0.123226	0.267002
ssc05225	Human Diseases	Cancer: specific types	Hepatocellular carcinoma	0.603408	0.813201	ENSSSCG00000031736	MGST2	2.03303	1.02363	0.000243307	0.0125681	up	yes	15.4175	19.1406	16.8528	10.2348	10.5673	4.48566
ssc04721	Organismal Systems	Nervous system	Synaptic vesicle cycle	0.603485	0.813201	ENSSSCG00000013119	STX3	0.26	-1.94342	3.69247e-07	6.89183e-05	down	yes	0.141502	0.201795	0.162157	0.620359	0.734522	0.58917
ssc04721	Organismal Systems	Nervous system	Synaptic vesicle cycle	0.603485	0.813201	ENSSSCG00000009601	SLC18A1	0.126732	-2.98014	0.000345946	0.0165372	down	yes	0.294342	0.035834	0.026567	1.09263	1.22866	0.493638
ssc04726	Organismal Systems	Nervous system	Serotonergic synapse	0.610631	0.813201	ENSSSCG00000041764	CACNA1C	0.417116	-1.26148	0.000233939	0.0122413	down	yes	0.652194	0.690959	0.533839	1.75916	1.81219	0.928585
ssc04726	Organismal Systems	Nervous system	Serotonergic synapse	0.610631	0.813201	ENSSSCG00000017980	ALOX12B	0.395874	-1.33689	0.00029145	0.0143928	down	yes	0.620518	0.751779	0.593624	1.54837	1.59878	1.81887
ssc04726	Organismal Systems	Nervous system	Serotonergic synapse	0.610631	0.813201	ENSSSCG00000009601	SLC18A1	0.126732	-2.98014	0.000345946	0.0165372	down	yes	0.294342	0.035834	0.026567	1.09263	1.22866	0.493638
ssc05143	Human Diseases	Infectious disease: parasitic	African trypanosomiasis	0.610692	0.813201	ENSSSCG00000039214	ENSSSCG00000039214	0.0285872	-5.12849	6.6841e-05	0.00472955	down	yes	0.071811	0	0	1.28911	1.08481	0.138086
ssc00350	Metabolism	Amino acid metabolism	Tyrosine metabolism	0.610692	0.813201	ENSSSCG00000010132	COMT	2.20222	1.13896	7.20871e-05	0.00501101	up	yes	59.7623	101.275	56.0842	26.5459	29.9137	42.1329
ssc05216	Human Diseases	Cancer: specific types	Thyroid cancer	0.621068	0.822755	ENSSSCG00000035249	GADD45G	2.50964	1.32748	1.97273e-12	1.29893e-09	up	yes	138.309	123.41	124.43	59.6796	57.9817	36.2047
ssc04110	Cellular Processes	Cell growth and death	Cell cycle	0.627671	0.827239	ENSSSCG00000035249	GADD45G	2.50964	1.32748	1.97273e-12	1.29893e-09	up	yes	138.309	123.41	124.43	59.6796	57.9817	36.2047
ssc04110	Cellular Processes	Cell growth and death	Cell cycle	0.627671	0.827239	ENSSSCG00000038694	CCND2	2.82238	1.49691	3.51989e-06	0.000482286	up	yes	2.2395	2.26468	1.56766	0.690152	0.583219	0.877948
ssc04110	Cellular Processes	Cell growth and death	Cell cycle	0.627671	0.827239	ENSSSCG00000006095	CCNE2	0.430658	-1.21539	0.000745772	0.0287444	down	yes	1.26223	1.7483	2.01328	4.72691	4.49502	2.4435
ssc04146	Cellular Processes	Transport and catabolism	Peroxisome	0.651503	0.854267	ENSSSCG00000017755	NOS2	0.297181	-1.75059	1.84656e-07	3.90812e-05	down	yes	2.46124	2.02222	2.07884	9.86271	8.36997	3.84918
ssc04146	Cellular Processes	Transport and catabolism	Peroxisome	0.651503	0.854267	ENSSSCG00000000541	FAR2	2.0922	1.06502	0.000590632	0.0241699	up	yes	0.539183	0.901283	0.8291	0.340599	0.373336	0.370841
ssc05033	Human Diseases	Substance dependence	Nicotine addiction	0.659892	0.860875	ENSSSCG00000005400	GRIN3A	3.07562	1.62088	7.19319e-06	0.000831617	up	yes	0.886578	0.630603	1.09641	0.319999	0.172159	0.357617
ssc05022	Human Diseases	Neurodegenerative disease	Pathways of neurodegeneration - multiple diseases	0.683707	0.877621	ENSSSCG00000035524	WNT9B	0.0878802	-3.50832	1.07095e-20	5.07714e-17	down	yes	0.08171	0.088024	0.11439	1.22233	0.961308	1.04944
ssc05022	Human Diseases	Neurodegenerative disease	Pathways of neurodegeneration - multiple diseases	0.683707	0.877621	ENSSSCG00000036246	GP91-PHOX	0.200829	-2.31596	4.81254e-17	1.14077e-13	down	yes	1.41299	0.869504	1.42653	7.58359	6.22046	4.66449
ssc05022	Human Diseases	Neurodegenerative disease	Pathways of neurodegeneration - multiple diseases	0.683707	0.877621	ENSSSCG00000017755	NOS2	0.297181	-1.75059	1.84656e-07	3.90812e-05	down	yes	2.46124	2.02222	2.07884	9.86271	8.36997	3.84918
ssc05022	Human Diseases	Neurodegenerative disease	Pathways of neurodegeneration - multiple diseases	0.683707	0.877621	ENSSSCG00000000884	APAF1	0.352906	-1.50264	6.00109e-07	0.00010537	down	yes	5.15605	6.92886	7.05755	23.5103	19.6224	11.1096
ssc05022	Human Diseases	Neurodegenerative disease	Pathways of neurodegeneration - multiple diseases	0.683707	0.877621	ENSSSCG00000039214	ENSSSCG00000039214	0.0285872	-5.12849	6.6841e-05	0.00472955	down	yes	0.071811	0	0	1.28911	1.08481	0.138086
ssc05022	Human Diseases	Neurodegenerative disease	Pathways of neurodegeneration - multiple diseases	0.683707	0.877621	ENSSSCG00000039535	CAMK2B	0.0501412	-4.31786	0.00011841	0.0073067	down	yes	0.0813007	0	0.049531	1.51878	1.04571	0.0447753
ssc05022	Human Diseases	Neurodegenerative disease	Pathways of neurodegeneration - multiple diseases	0.683707	0.877621	ENSSSCG00000041764	CACNA1C	0.417116	-1.26148	0.000233939	0.0122413	down	yes	0.652194	0.690959	0.533839	1.75916	1.81219	0.928585
ssc05022	Human Diseases	Neurodegenerative disease	Pathways of neurodegeneration - multiple diseases	0.683707	0.877621	ENSSSCG00000018015	DNAH9	0.170696	-2.5505	0.000246052	0.0126517	down	yes	0.074275	0.008705	0.042701	0.29823	0.317983	0.120072
ssc05022	Human Diseases	Neurodegenerative disease	Pathways of neurodegeneration - multiple diseases	0.683707	0.877621	ENSSSCG00000032094	DKK2	0.416099	-1.265	0.000323186	0.0155707	down	yes	2.59426	1.71149	4.33831	8.39117	6.32682	6.05608
ssc05022	Human Diseases	Neurodegenerative disease	Pathways of neurodegeneration - multiple diseases	0.683707	0.877621	ENSSSCG00000008090	IL1A	0.0874798	-3.51491	0.000343591	0.0164868	down	yes	0	0.138294	0.158153	1.4831	1.47258	0.433082
ssc05022	Human Diseases	Neurodegenerative disease	Pathways of neurodegeneration - multiple diseases	0.683707	0.877621	ENSSSCG00000058790	RYR1	0.0971762	-3.36325	0.000776237	0.0294871	down	yes	0.00557775	0	0.0358295	0.155492	0.194144	0.0764682
ssc04270	Organismal Systems	Circulatory system	Vascular smooth muscle contraction	0.68571	0.877621	ENSSSCG00000020720	IRAG1	0.37861	-1.40122	3.23694e-09	1.06567e-06	down	yes	1.93675	2.08254	1.69043	5.45535	5.69097	3.93441
ssc04270	Organismal Systems	Circulatory system	Vascular smooth muscle contraction	0.68571	0.877621	ENSSSCG00000009031	EDNRA	0.493443	-1.01905	2.44207e-05	0.00218858	down	yes	4.47861	3.09206	4.08091	9.60955	7.74763	6.25565
ssc04270	Organismal Systems	Circulatory system	Vascular smooth muscle contraction	0.68571	0.877621	ENSSSCG00000041764	CACNA1C	0.417116	-1.26148	0.000233939	0.0122413	down	yes	0.652194	0.690959	0.533839	1.75916	1.81219	0.928585
ssc00071	Metabolism	Lipid metabolism	Fatty acid degradation	0.686388	0.877621	ENSSSCG00000012880	CPT1A	0.328307	-1.60688	3.77987e-10	1.59997e-07	down	yes	6.63109	5.29289	6.21136	23.2543	20.0516	11.9332
ssc04672	Organismal Systems	Immune system	Intestinal immune network for IgA production	0.686388	0.877621	ENSSSCG00000039416	CXCR4	0.353752	-1.49919	8.43721e-05	0.00557091	down	yes	2.88652	1.8953	2.56487	9.5084	7.60031	3.65923
ssc00380	Metabolism	Amino acid metabolism	Tryptophan metabolism	0.7029	0.889879	ENSSSCG00000025686	KMO	0.343143	-1.54312	3.74117e-05	0.00303699	down	yes	1.52315	0.569554	1.14526	3.47431	3.30905	2.65283
ssc00970	Genetic Information Processing	Translation	Aminoacyl-tRNA biosynthesis	0.7029	0.889879	ENSSSCG00000038717	FARS2	2.08755	1.06181	0.000717754	0.0278455	up	yes	7.6011	15.7686	11.3342	4.79606	4.89424	6.93391
ssc00514	Metabolism	Glycan biosynthesis and metabolism	Other types of O-glycan biosynthesis	0.710829	0.893897	ENSSSCG00000008141	ST6GAL2	0.365532	-1.45193	0.000198791	0.0109077	down	yes	1.47647	0.444793	0.980091	2.92066	2.57512	2.44158
ssc04360	Organismal Systems	Development and regeneration	Axon guidance	0.713031	0.893897	ENSSSCG00000000907	PLXNC1	0.357295	-1.48481	2.56356e-07	5.13213e-05	down	yes	0.688929	0.514585	0.778734	2.36747	1.7001	1.48035
ssc04360	Organismal Systems	Development and regeneration	Axon guidance	0.713031	0.893897	ENSSSCG00000039416	CXCR4	0.353752	-1.49919	8.43721e-05	0.00557091	down	yes	2.88652	1.8953	2.56487	9.5084	7.60031	3.65923
ssc04360	Organismal Systems	Development and regeneration	Axon guidance	0.713031	0.893897	ENSSSCG00000014430	ABLIM3	0.428933	-1.22117	9.4173e-05	0.00604953	down	yes	19.6434	8.88981	10.0104	34.078	31.6196	24.1617
ssc04360	Organismal Systems	Development and regeneration	Axon guidance	0.713031	0.893897	ENSSSCG00000039535	CAMK2B	0.0501412	-4.31786	0.00011841	0.0073067	down	yes	0.0813007	0	0.049531	1.51878	1.04571	0.0447753
ssc00510	Metabolism	Glycan biosynthesis and metabolism	N-Glycan biosynthesis	0.72606	0.901762	ENSSSCG00000008141	ST6GAL2	0.365532	-1.45193	0.000198791	0.0109077	down	yes	1.47647	0.444793	0.980091	2.92066	2.57512	2.44158
ssc04916	Organismal Systems	Endocrine system	Melanogenesis	0.728308	0.901762	ENSSSCG00000035524	WNT9B	0.0878802	-3.50832	1.07095e-20	5.07714e-17	down	yes	0.08171	0.088024	0.11439	1.22233	0.961308	1.04944
ssc04916	Organismal Systems	Endocrine system	Melanogenesis	0.728308	0.901762	ENSSSCG00000039535	CAMK2B	0.0501412	-4.31786	0.00011841	0.0073067	down	yes	0.0813007	0	0.049531	1.51878	1.04571	0.0447753
ssc05010	Human Diseases	Neurodegenerative disease	Alzheimer disease	0.735108	0.901762	ENSSSCG00000035524	WNT9B	0.0878802	-3.50832	1.07095e-20	5.07714e-17	down	yes	0.08171	0.088024	0.11439	1.22233	0.961308	1.04944
ssc05010	Human Diseases	Neurodegenerative disease	Alzheimer disease	0.735108	0.901762	ENSSSCG00000036246	GP91-PHOX	0.200829	-2.31596	4.81254e-17	1.14077e-13	down	yes	1.41299	0.869504	1.42653	7.58359	6.22046	4.66449
ssc05010	Human Diseases	Neurodegenerative disease	Alzheimer disease	0.735108	0.901762	ENSSSCG00000017755	NOS2	0.297181	-1.75059	1.84656e-07	3.90812e-05	down	yes	2.46124	2.02222	2.07884	9.86271	8.36997	3.84918
ssc05010	Human Diseases	Neurodegenerative disease	Alzheimer disease	0.735108	0.901762	ENSSSCG00000000884	APAF1	0.352906	-1.50264	6.00109e-07	0.00010537	down	yes	5.15605	6.92886	7.05755	23.5103	19.6224	11.1096
ssc05010	Human Diseases	Neurodegenerative disease	Alzheimer disease	0.735108	0.901762	ENSSSCG00000039214	ENSSSCG00000039214	0.0285872	-5.12849	6.6841e-05	0.00472955	down	yes	0.071811	0	0	1.28911	1.08481	0.138086
ssc05010	Human Diseases	Neurodegenerative disease	Alzheimer disease	0.735108	0.901762	ENSSSCG00000041764	CACNA1C	0.417116	-1.26148	0.000233939	0.0122413	down	yes	0.652194	0.690959	0.533839	1.75916	1.81219	0.928585
ssc05010	Human Diseases	Neurodegenerative disease	Alzheimer disease	0.735108	0.901762	ENSSSCG00000032094	DKK2	0.416099	-1.265	0.000323186	0.0155707	down	yes	2.59426	1.71149	4.33831	8.39117	6.32682	6.05608
ssc05010	Human Diseases	Neurodegenerative disease	Alzheimer disease	0.735108	0.901762	ENSSSCG00000008090	IL1A	0.0874798	-3.51491	0.000343591	0.0164868	down	yes	0	0.138294	0.158153	1.4831	1.47258	0.433082
ssc00982	Metabolism	Xenobiotics biodegradation and metabolism	Drug metabolism - cytochrome P450	0.740492	0.901762	ENSSSCG00000031736	MGST2	2.03303	1.02363	0.000243307	0.0125681	up	yes	15.4175	19.1406	16.8528	10.2348	10.5673	4.48566
ssc04072	Environmental Information Processing	Signal transduction	Phospholipase D signaling pathway	0.741061	0.901762	ENSSSCG00000017991	PIK3R5	0.434454	-1.20272	1.8338e-05	0.00173181	down	yes	1.1792	0.846518	1.06752	2.17675	2.86488	2.07819
ssc04072	Environmental Information Processing	Signal transduction	Phospholipase D signaling pathway	0.741061	0.901762	ENSSSCG00000039841	SHC3	0.0303958	-5.03999	0.000150148	0.00883263	down	yes	0	0	0.0177165	0.192635	0.123226	0.267002
ssc04072	Environmental Information Processing	Signal transduction	Phospholipase D signaling pathway	0.741061	0.901762	ENSSSCG00000006357	FCER1G	0.444342	-1.17026	0.00142656	0.046706	down	yes	26.3364	10.6467	21.8834	58.2995	44.452	29.7286
ssc01240	Metabolism	Global and overview maps	Biosynthesis of cofactors	0.741061	0.901762	ENSSSCG00000025686	KMO	0.343143	-1.54312	3.74117e-05	0.00303699	down	yes	1.52315	0.569554	1.14526	3.47431	3.30905	2.65283
ssc01240	Metabolism	Global and overview maps	Biosynthesis of cofactors	0.741061	0.901762	ENSSSCG00000029163	BCAT1	0.482346	-1.05186	0.000574151	0.0236909	down	yes	0.589561	0.638057	1.03372	1.77002	1.54194	1.37624
ssc01240	Metabolism	Global and overview maps	Biosynthesis of cofactors	0.741061	0.901762	ENSSSCG00000007287	GSS	2.15912	1.11044	0.000783454	0.0295571	up	yes	14.4623	8.47896	4.55779	3.78827	4.24754	4.70044
ssc04922	Organismal Systems	Endocrine system	Glucagon signaling pathway	0.743866	0.901762	ENSSSCG00000012880	CPT1A	0.328307	-1.60688	3.77987e-10	1.59997e-07	down	yes	6.63109	5.29289	6.21136	23.2543	20.0516	11.9332
ssc04922	Organismal Systems	Endocrine system	Glucagon signaling pathway	0.743866	0.901762	ENSSSCG00000039535	CAMK2B	0.0501412	-4.31786	0.00011841	0.0073067	down	yes	0.0813007	0	0.049531	1.51878	1.04571	0.0447753
ssc04150	Environmental Information Processing	Signal transduction	mTOR signaling pathway	0.765709	0.919882	ENSSSCG00000035524	WNT9B	0.0878802	-3.50832	1.07095e-20	5.07714e-17	down	yes	0.08171	0.088024	0.11439	1.22233	0.961308	1.04944
ssc04150	Environmental Information Processing	Signal transduction	mTOR signaling pathway	0.765709	0.919882	ENSSSCG00000003558	RPS6KA1	0.362549	-1.46375	7.4794e-09	2.11062e-06	down	yes	1.5968	0.916633	1.21914	3.78318	3.57171	2.9405
ssc04150	Environmental Information Processing	Signal transduction	mTOR signaling pathway	0.765709	0.919882	ENSSSCG00000059665	CEP192	0.488575	-1.03335	0.000685317	0.0268065	down	yes	2.78597	1.65281	2.41829	6.04044	4.79214	3.20225
ssc04370	Environmental Information Processing	Signal transduction	VEGF signaling pathway	0.773347	0.919882	ENSSSCG00000016450	NOS3	0.432766	-1.20834	0.000155416	0.00902937	down	yes	19.8828	15.445	15.7595	51.4707	45.3423	21.2353
ssc00980	Metabolism	Xenobiotics biodegradation and metabolism	Metabolism of xenobiotics by cytochrome P450	0.773347	0.919882	ENSSSCG00000031736	MGST2	2.03303	1.02363	0.000243307	0.0125681	up	yes	15.4175	19.1406	16.8528	10.2348	10.5673	4.48566
ssc04390	Environmental Information Processing	Signal transduction	Hippo signaling pathway	0.777304	0.919882	ENSSSCG00000035524	WNT9B	0.0878802	-3.50832	1.07095e-20	5.07714e-17	down	yes	0.08171	0.088024	0.11439	1.22233	0.961308	1.04944
ssc04390	Environmental Information Processing	Signal transduction	Hippo signaling pathway	0.777304	0.919882	ENSSSCG00000025133	ITGB2	0.381078	-1.39184	2.91286e-07	5.70633e-05	down	yes	2.92941	1.79459	2.96807	5.92198	6.52439	7.73865
ssc04390	Environmental Information Processing	Signal transduction	Hippo signaling pathway	0.777304	0.919882	ENSSSCG00000038694	CCND2	2.82238	1.49691	3.51989e-06	0.000482286	up	yes	2.2395	2.26468	1.56766	0.690152	0.583219	0.877948
ssc05206	Human Diseases	Cancer: overview	MicroRNAs in cancer	0.784557	0.919882	ENSSSCG00000038694	CCND2	2.82238	1.49691	3.51989e-06	0.000482286	up	yes	2.2395	2.26468	1.56766	0.690152	0.583219	0.877948
ssc05206	Human Diseases	Cancer: overview	MicroRNAs in cancer	0.784557	0.919882	ENSSSCG00000015246	ST14	0.230489	-2.11723	5.20309e-06	0.000642365	down	yes	0.286964	0.285453	0.312238	0.815616	1.15433	1.86822
ssc05206	Human Diseases	Cancer: overview	MicroRNAs in cancer	0.784557	0.919882	ENSSSCG00000007436	MMP9	0.112103	-3.1571	0.000519315	0.0219036	down	yes	0.544271	0.755057	2.65784	5.2783	8.88265	21.1384
ssc05206	Human Diseases	Cancer: overview	MicroRNAs in cancer	0.784557	0.919882	ENSSSCG00000018758	ssc-mir-214	0.0226906	-5.46176	0.000524034	0.0219663	down	yes	0.272282	0.064172	0	8.99909	4.30256	1.52625
ssc05206	Human Diseases	Cancer: overview	MicroRNAs in cancer	0.784557	0.919882	ENSSSCG00000006095	CCNE2	0.430658	-1.21539	0.000745772	0.0287444	down	yes	1.26223	1.7483	2.01328	4.72691	4.49502	2.4435
ssc05213	Human Diseases	Cancer: specific types	Endometrial cancer	0.791036	0.919882	ENSSSCG00000035249	GADD45G	2.50964	1.32748	1.97273e-12	1.29893e-09	up	yes	138.309	123.41	124.43	59.6796	57.9817	36.2047
ssc04730	Organismal Systems	Nervous system	Long-term depression	0.796622	0.919882	ENSSSCG00000058790	RYR1	0.0971762	-3.36325	0.000776237	0.0294871	down	yes	0.00557775	0	0.0358295	0.155492	0.194144	0.0764682
ssc04724	Organismal Systems	Nervous system	Glutamatergic synapse	0.798691	0.919882	ENSSSCG00000005400	GRIN3A	3.07562	1.62088	7.19319e-06	0.000831617	up	yes	0.886578	0.630603	1.09641	0.319999	0.172159	0.357617
ssc04724	Organismal Systems	Nervous system	Glutamatergic synapse	0.798691	0.919882	ENSSSCG00000041764	CACNA1C	0.417116	-1.26148	0.000233939	0.0122413	down	yes	0.652194	0.690959	0.533839	1.75916	1.81219	0.928585
ssc05034	Human Diseases	Substance dependence	Alcoholism	0.80254	0.919882	ENSSSCG00000005400	GRIN3A	3.07562	1.62088	7.19319e-06	0.000831617	up	yes	0.886578	0.630603	1.09641	0.319999	0.172159	0.357617
ssc05034	Human Diseases	Substance dependence	Alcoholism	0.80254	0.919882	ENSSSCG00000039841	SHC3	0.0303958	-5.03999	0.000150148	0.00883263	down	yes	0	0	0.0177165	0.192635	0.123226	0.267002
ssc05034	Human Diseases	Substance dependence	Alcoholism	0.80254	0.919882	ENSSSCG00000009601	SLC18A1	0.126732	-2.98014	0.000345946	0.0165372	down	yes	0.294342	0.035834	0.026567	1.09263	1.22866	0.493638
ssc01200	Metabolism	Global and overview maps	Carbon metabolism	0.802757	0.919882	ENSSSCG00000007748	PSPH	2.26805	1.18145	0.000825442	0.0306681	up	yes	9.42477	11.8839	13.4987	3.09206	3.96685	8.2879
ssc01200	Metabolism	Global and overview maps	Carbon metabolism	0.802757	0.919882	ENSSSCG00000014048	HK3	0.44934	-1.15412	0.00117174	0.0400821	down	yes	3.2522	2.97804	4.95353	10.3246	9.83361	4.73113
ssc00140	Metabolism	Lipid metabolism	Steroid hormone biosynthesis	0.812502	0.919882	ENSSSCG00000010132	COMT	2.20222	1.13896	7.20871e-05	0.00501101	up	yes	59.7623	101.275	56.0842	26.5459	29.9137	42.1329
ssc04927	Organismal Systems	Endocrine system	Cortisol synthesis and secretion	0.812502	0.919882	ENSSSCG00000041764	CACNA1C	0.417116	-1.26148	0.000233939	0.0122413	down	yes	0.652194	0.690959	0.533839	1.75916	1.81219	0.928585
ssc00983	Metabolism	Xenobiotics biodegradation and metabolism	Drug metabolism - other enzymes	0.812502	0.919882	ENSSSCG00000031736	MGST2	2.03303	1.02363	0.000243307	0.0125681	up	yes	15.4175	19.1406	16.8528	10.2348	10.5673	4.48566
ssc00310	Metabolism	Amino acid metabolism	Lysine degradation	0.812502	0.919882	ENSSSCG00000023324	KMT2A	0.452616	-1.14364	0.00035746	0.0168454	down	yes	2.53814	1.75899	2.06848	6.04121	5.38874	2.63409
ssc00010	Metabolism	Carbohydrate metabolism	Glycolysis / Gluconeogenesis	0.812502	0.919882	ENSSSCG00000014048	HK3	0.44934	-1.15412	0.00117174	0.0400821	down	yes	3.2522	2.97804	4.95353	10.3246	9.83361	4.73113
ssc04071	Environmental Information Processing	Signal transduction	Sphingolipid signaling pathway	0.822018	0.922414	ENSSSCG00000016450	NOS3	0.432766	-1.20834	0.000155416	0.00902937	down	yes	19.8828	15.445	15.7595	51.4707	45.3423	21.2353
ssc04071	Environmental Information Processing	Signal transduction	Sphingolipid signaling pathway	0.822018	0.922414	ENSSSCG00000006357	FCER1G	0.444342	-1.17026	0.00142656	0.046706	down	yes	26.3364	10.6467	21.8834	58.2995	44.452	29.7286
ssc04919	Organismal Systems	Endocrine system	Thyroid hormone signaling pathway	0.82924	0.922414	ENSSSCG00000006391	ATP1A2	0.41596	-1.26548	1.27357e-05	0.00129875	down	yes	0.720325	0.890562	0.655964	2.03469	1.67091	1.74409
ssc04919	Organismal Systems	Endocrine system	Thyroid hormone signaling pathway	0.82924	0.922414	ENSSSCG00000017951	ATP1B2	0.45804	-1.12646	5.14125e-05	0.00384442	down	yes	2.02642	1.5372	1.39938	3.37284	3.7959	3.66657
ssc05204	Human Diseases	Cancer: overview	Chemical carcinogenesis - DNA adducts	0.831773	0.922414	ENSSSCG00000031736	MGST2	2.03303	1.02363	0.000243307	0.0125681	up	yes	15.4175	19.1406	16.8528	10.2348	10.5673	4.48566
ssc05218	Human Diseases	Cancer: specific types	Melanoma	0.836274	0.922414	ENSSSCG00000035249	GADD45G	2.50964	1.32748	1.97273e-12	1.29893e-09	up	yes	138.309	123.41	124.43	59.6796	57.9817	36.2047
ssc05211	Human Diseases	Cancer: specific types	Renal cell carcinoma	0.836274	0.922414	ENSSSCG00000031912	JUN	2.12853	1.08985	7.09926e-07	0.000121065	up	yes	146.559	238.531	232.136	108.009	103.724	78.2458
ssc05230	Human Diseases	Cancer: overview	Central carbon metabolism in cancer	0.836274	0.922414	ENSSSCG00000014048	HK3	0.44934	-1.15412	0.00117174	0.0400821	down	yes	3.2522	2.97804	4.95353	10.3246	9.83361	4.73113
ssc05223	Human Diseases	Cancer: specific types	Non-small cell lung cancer	0.84492	0.927968	ENSSSCG00000035249	GADD45G	2.50964	1.32748	1.97273e-12	1.29893e-09	up	yes	138.309	123.41	124.43	59.6796	57.9817	36.2047
ssc05212	Human Diseases	Cancer: specific types	Pancreatic cancer	0.864598	0.936454	ENSSSCG00000035249	GADD45G	2.50964	1.32748	1.97273e-12	1.29893e-09	up	yes	138.309	123.41	124.43	59.6796	57.9817	36.2047
ssc03008	Genetic Information Processing	Translation	Ribosome biogenesis in eukaryotes	0.864598	0.936454	ENSSSCG00000011827	LSG1	0.436706	-1.19526	1.02728e-11	5.79777e-09	down	yes	7.97466	7.5732	8.43228	20.1194	19.168	15.624
ssc00590	Metabolism	Lipid metabolism	Arachidonic acid metabolism	0.868224	0.936454	ENSSSCG00000017980	ALOX12B	0.395874	-1.33689	0.00029145	0.0143928	down	yes	0.620518	0.751779	0.593624	1.54837	1.59878	1.81887
ssc05100	Human Diseases	Infectious disease: bacterial	Bacterial invasion of epithelial cells	0.871754	0.936454	ENSSSCG00000039841	SHC3	0.0303958	-5.03999	0.000150148	0.00883263	down	yes	0	0	0.0177165	0.192635	0.123226	0.267002
ssc01521	Human Diseases	Drug resistance: antineoplastic	EGFR tyrosine kinase inhibitor resistance	0.87519	0.936454	ENSSSCG00000039841	SHC3	0.0303958	-5.03999	0.000150148	0.00883263	down	yes	0	0	0.0177165	0.192635	0.123226	0.267002
ssc04140	Cellular Processes	Transport and catabolism	Autophagy - animal	0.878154	0.936454	ENSSSCG00000036352	RAB7B	0.211099	-2.24401	2.62719e-13	2.23924e-10	down	yes	0.533683	0.660679	0.64241	2.36503	3.20816	3.12778
ssc04140	Cellular Processes	Transport and catabolism	Autophagy - animal	0.878154	0.936454	ENSSSCG00000010949	DAPK1	0.382112	-1.38793	0.0011241	0.039133	down	yes	1.72233	1.1468	2.38827	6.56788	5.1557	2.0352
ssc04910	Organismal Systems	Endocrine system	Insulin signaling pathway	0.878154	0.936454	ENSSSCG00000039841	SHC3	0.0303958	-5.03999	0.000150148	0.00883263	down	yes	0	0	0.0177165	0.192635	0.123226	0.267002
ssc04910	Organismal Systems	Endocrine system	Insulin signaling pathway	0.878154	0.936454	ENSSSCG00000014048	HK3	0.44934	-1.15412	0.00117174	0.0400821	down	yes	3.2522	2.97804	4.95353	10.3246	9.83361	4.73113
ssc05017	Human Diseases	Neurodegenerative disease	Spinocerebellar ataxia	0.892913	0.946427	ENSSSCG00000005400	GRIN3A	3.07562	1.62088	7.19319e-06	0.000831617	up	yes	0.886578	0.630603	1.09641	0.319999	0.172159	0.357617
ssc05017	Human Diseases	Neurodegenerative disease	Spinocerebellar ataxia	0.892913	0.946427	ENSSSCG00000058790	RYR1	0.0971762	-3.36325	0.000776237	0.0294871	down	yes	0.00557775	0	0.0358295	0.155492	0.194144	0.0764682
ssc01100	Metabolism	Global and overview maps	Metabolic pathways	0.894871	0.946427	ENSSSCG00000028204	TREH	0.168418	-2.56988	3.53805e-12	2.15041e-09	down	yes	0.493462	0.875588	1.35777	5.17564	5.28433	5.73084
ssc01100	Metabolism	Global and overview maps	Metabolic pathways	0.894871	0.946427	ENSSSCG00000022492	AMPD3	0.204089	-2.29273	7.70366e-10	2.94528e-07	down	yes	0.368515	0.183022	0.300272	1.61845	1.68894	0.866314
ssc01100	Metabolism	Global and overview maps	Metabolic pathways	0.894871	0.946427	ENSSSCG00000017755	NOS2	0.297181	-1.75059	1.84656e-07	3.90812e-05	down	yes	2.46124	2.02222	2.07884	9.86271	8.36997	3.84918
ssc01100	Metabolism	Global and overview maps	Metabolic pathways	0.894871	0.946427	ENSSSCG00000009245	SCD5	0.410423	-1.28482	8.84037e-06	0.000979215	down	yes	1.22876	1.08594	0.982728	2.97511	2.62671	2.4324
ssc01100	Metabolism	Global and overview maps	Metabolic pathways	0.894871	0.946427	ENSSSCG00000007909	ABAT	0.293793	-1.76713	9.8396e-06	0.0010699	down	yes	1.05185	0.934704	0.686973	3.95648	3.7526	1.39096
ssc01100	Metabolism	Global and overview maps	Metabolic pathways	0.894871	0.946427	ENSSSCG00000015930	DHRS9	0.219323	-2.18887	1.06307e-05	0.00113509	down	yes	0.211662	0.357542	0.198184	1.42995	1.30568	0.763262
ssc01100	Metabolism	Global and overview maps	Metabolic pathways	0.894871	0.946427	ENSSSCG00000027121	ODC1	0.433876	-1.20464	2.66331e-05	0.00229568	down	yes	4.39082	4.69997	4.67224	13.5644	11.1915	6.96526
ssc01100	Metabolism	Global and overview maps	Metabolic pathways	0.894871	0.946427	ENSSSCG00000004822	ALDH1A3	0.484955	-1.04408	3.07534e-05	0.0025759	down	yes	3.6642	3.0817	5.23532	8.60732	8.17866	7.91984
ssc01100	Metabolism	Global and overview maps	Metabolic pathways	0.894871	0.946427	ENSSSCG00000025686	KMO	0.343143	-1.54312	3.74117e-05	0.00303699	down	yes	1.52315	0.569554	1.14526	3.47431	3.30905	2.65283
ssc01100	Metabolism	Global and overview maps	Metabolic pathways	0.894871	0.946427	ENSSSCG00000052399	ENSSSCG00000052399	2.30484	1.20467	4.21867e-05	0.00330031	up	yes	51.2059	20.1922	52.8127	17.7993	18.7737	17.3182
ssc01100	Metabolism	Global and overview maps	Metabolic pathways	0.894871	0.946427	ENSSSCG00000005740	SARDH	0.0996669	-3.32674	4.48481e-05	0.00345586	down	yes	0.143634	0.0862974	0.125092	0.141478	0.696402	2.72422
ssc01100	Metabolism	Global and overview maps	Metabolic pathways	0.894871	0.946427	ENSSSCG00000009237	HPSE	0.131385	-2.92812	5.78051e-05	0.0041974	down	yes	0.281513	0.09177	0.17424	2.19033	1.71377	0.263206
ssc01100	Metabolism	Global and overview maps	Metabolic pathways	0.894871	0.946427	ENSSSCG00000010132	COMT	2.20222	1.13896	7.20871e-05	0.00501101	up	yes	59.7623	101.275	56.0842	26.5459	29.9137	42.1329
ssc01100	Metabolism	Global and overview maps	Metabolic pathways	0.894871	0.946427	ENSSSCG00000016829	AGXT2	0.146103	-2.77495	0.000108233	0.00681164	down	yes	0.208712	0.0272652	0.0378371	0.453386	0.552215	0.868524
ssc01100	Metabolism	Global and overview maps	Metabolic pathways	0.894871	0.946427	ENSSSCG00000036132	CKM	0.242785	-2.04225	0.000108336	0.00681164	down	yes	0.397174	0.200551	0.201502	0.70483	0.958889	1.62819
ssc01100	Metabolism	Global and overview maps	Metabolic pathways	0.894871	0.946427	ENSSSCG00000023186	CA4	0.331803	-1.5916	0.000135906	0.00817641	down	yes	10.7935	10.3256	6.77742	38.2227	34.1264	11.7262
ssc01100	Metabolism	Global and overview maps	Metabolic pathways	0.894871	0.946427	ENSSSCG00000016450	NOS3	0.432766	-1.20834	0.000155416	0.00902937	down	yes	19.8828	15.445	15.7595	51.4707	45.3423	21.2353
ssc01100	Metabolism	Global and overview maps	Metabolic pathways	0.894871	0.946427	ENSSSCG00000008141	ST6GAL2	0.365532	-1.45193	0.000198791	0.0109077	down	yes	1.47647	0.444793	0.980091	2.92066	2.57512	2.44158
ssc01100	Metabolism	Global and overview maps	Metabolic pathways	0.894871	0.946427	ENSSSCG00000023706	CHIA	2742.8	11.4214	0.000220409	0.0117989	up	yes	0.720124	0.077848	0.024868	0	0	0
ssc01100	Metabolism	Global and overview maps	Metabolic pathways	0.894871	0.946427	ENSSSCG00000031736	MGST2	2.03303	1.02363	0.000243307	0.0125681	up	yes	15.4175	19.1406	16.8528	10.2348	10.5673	4.48566
ssc01100	Metabolism	Global and overview maps	Metabolic pathways	0.894871	0.946427	ENSSSCG00000017980	ALOX12B	0.395874	-1.33689	0.00029145	0.0143928	down	yes	0.620518	0.751779	0.593624	1.54837	1.59878	1.81887
ssc01100	Metabolism	Global and overview maps	Metabolic pathways	0.894871	0.946427	ENSSSCG00000023324	KMT2A	0.452616	-1.14364	0.00035746	0.0168454	down	yes	2.53814	1.75899	2.06848	6.04121	5.38874	2.63409
ssc01100	Metabolism	Global and overview maps	Metabolic pathways	0.894871	0.946427	ENSSSCG00000029163	BCAT1	0.482346	-1.05186	0.000574151	0.0236909	down	yes	0.589561	0.638057	1.03372	1.77002	1.54194	1.37624
ssc01100	Metabolism	Global and overview maps	Metabolic pathways	0.894871	0.946427	ENSSSCG00000036331	ENSSSCG00000036331	0.257215	-1.95895	0.000574682	0.0236909	down	yes	1.63153	0.381728	1.8181	7.97764	4.44577	2.47214
ssc01100	Metabolism	Global and overview maps	Metabolic pathways	0.894871	0.946427	ENSSSCG00000025345	GUCY2D	0.358857	-1.47852	0.00072414	0.0280474	down	yes	0.681588	0.300543	0.320806	1.27504	1.29181	1.06395
ssc01100	Metabolism	Global and overview maps	Metabolic pathways	0.894871	0.946427	ENSSSCG00000007287	GSS	2.15912	1.11044	0.000783454	0.0295571	up	yes	14.4623	8.47896	4.55779	3.78827	4.24754	4.70044
ssc01100	Metabolism	Global and overview maps	Metabolic pathways	0.894871	0.946427	ENSSSCG00000007748	PSPH	2.26805	1.18145	0.000825442	0.0306681	up	yes	9.42477	11.8839	13.4987	3.09206	3.96685	8.2879
ssc01100	Metabolism	Global and overview maps	Metabolic pathways	0.894871	0.946427	ENSSSCG00000035218	ADA2	0.291284	-1.7795	0.00108063	0.0378924	down	yes	2.58238	0.379381	0.940361	4.64082	4.51125	4.24421
ssc01100	Metabolism	Global and overview maps	Metabolic pathways	0.894871	0.946427	ENSSSCG00000014048	HK3	0.44934	-1.15412	0.00117174	0.0400821	down	yes	3.2522	2.97804	4.95353	10.3246	9.83361	4.73113
ssc01100	Metabolism	Global and overview maps	Metabolic pathways	0.894871	0.946427	ENSSSCG00000006140	CA2	0.397894	-1.32955	0.00130042	0.0432329	down	yes	1.53221	0.538667	1.02071	2.33162	2.49577	2.94248
ssc01100	Metabolism	Global and overview maps	Metabolic pathways	0.894871	0.946427	ENSSSCG00000007872	XYLT1	0.391913	-1.3514	0.00138045	0.0455741	down	yes	0.219359	0.328482	0.353648	1.07942	0.768617	0.45219
ssc01100	Metabolism	Global and overview maps	Metabolic pathways	0.894871	0.946427	ENSSSCG00000055915	ENSSSCG00000055915	4.46262	2.15789	0.00152979	0.0490691	up	yes	0.208798	0.468566	0.528721	0.058469	0.080233	0.131562
ssc04914	Organismal Systems	Endocrine system	Progesterone-mediated oocyte maturation	0.904889	0.9531	ENSSSCG00000003558	RPS6KA1	0.362549	-1.46375	7.4794e-09	2.11062e-06	down	yes	1.5968	0.916633	1.21914	3.78318	3.57171	2.9405
ssc05160	Human Diseases	Infectious disease: viral	Hepatitis C	0.910026	0.953136	ENSSSCG00000000884	APAF1	0.352906	-1.50264	6.00109e-07	0.00010537	down	yes	5.15605	6.92886	7.05755	23.5103	19.6224	11.1096
ssc05160	Human Diseases	Infectious disease: viral	Hepatitis C	0.910026	0.953136	ENSSSCG00000017934	CLDN7	3.10308	1.6337	2.03408e-05	0.00189082	up	yes	4.48926	6.32532	2.83327	1.18991	1.46911	1.73915
ssc03015	Genetic Information Processing	Translation	mRNA surveillance pathway	0.912341	0.953136	ENSSSCG00000036367	PABPN1L	2790.5	11.4463	0.00107157	0.0376304	up	yes	0.23516	0.407651	0.194338	0	0	0
ssc05032	Human Diseases	Substance dependence	Morphine addiction	0.916983	0.954108	ENSSSCG00000014852	ARRB1	0.409585	-1.28776	4.25724e-10	1.73989e-07	down	yes	4.0559	2.85499	3.12716	9.11295	8.37177	7.02312
ssc04141	Genetic Information Processing	Folding, sorting and degradation	Protein processing in endoplasmic reticulum	0.933983	0.966861	ENSSSCG00000013784	DNAJB1	2.90086	1.53648	5.11153e-06	0.000634365	up	yes	21.5268	55.563	70.341	16.9963	16.5015	17.3254
ssc04141	Genetic Information Processing	Folding, sorting and degradation	Protein processing in endoplasmic reticulum	0.933983	0.966861	ENSSSCG00000032452	WFS1	0.328785	-1.60479	6.58784e-06	0.000781107	down	yes	5.7629	7.88736	3.26211	16.0136	15.8471	19.5783
ssc04014	Environmental Information Processing	Signal transduction	Ras signaling pathway	0.936764	0.966861	ENSSSCG00000014441	CSF1R	0.267402	-1.90292	5.30672e-09	1.61802e-06	down	yes	12.3228	4.42678	8.77211	36.1176	33.7569	25.5687
ssc04014	Environmental Information Processing	Signal transduction	Ras signaling pathway	0.936764	0.966861	ENSSSCG00000002960	RASGRP4	0.30911	-1.69381	1.28749e-05	0.00130421	down	yes	1.26098	0.591939	0.89653	3.87169	3.19924	1.82377
ssc04014	Environmental Information Processing	Signal transduction	Ras signaling pathway	0.936764	0.966861	ENSSSCG00000039841	SHC3	0.0303958	-5.03999	0.000150148	0.00883263	down	yes	0	0	0.0177165	0.192635	0.123226	0.267002
ssc05012	Human Diseases	Neurodegenerative disease	Parkinson disease	0.958549	0.984302	ENSSSCG00000000884	APAF1	0.352906	-1.50264	6.00109e-07	0.00010537	down	yes	5.15605	6.92886	7.05755	23.5103	19.6224	11.1096
ssc05012	Human Diseases	Neurodegenerative disease	Parkinson disease	0.958549	0.984302	ENSSSCG00000039535	CAMK2B	0.0501412	-4.31786	0.00011841	0.0073067	down	yes	0.0813007	0	0.049531	1.51878	1.04571	0.0447753
ssc05012	Human Diseases	Neurodegenerative disease	Parkinson disease	0.958549	0.984302	ENSSSCG00000009601	SLC18A1	0.126732	-2.98014	0.000345946	0.0165372	down	yes	0.294342	0.035834	0.026567	1.09263	1.22866	0.493638
ssc05014	Human Diseases	Neurodegenerative disease	Amyotrophic lateral sclerosis	0.961322	0.984302	ENSSSCG00000017755	NOS2	0.297181	-1.75059	1.84656e-07	3.90812e-05	down	yes	2.46124	2.02222	2.07884	9.86271	8.36997	3.84918
ssc05014	Human Diseases	Neurodegenerative disease	Amyotrophic lateral sclerosis	0.961322	0.984302	ENSSSCG00000000884	APAF1	0.352906	-1.50264	6.00109e-07	0.00010537	down	yes	5.15605	6.92886	7.05755	23.5103	19.6224	11.1096
ssc05014	Human Diseases	Neurodegenerative disease	Amyotrophic lateral sclerosis	0.961322	0.984302	ENSSSCG00000018015	DNAH9	0.170696	-2.5505	0.000246052	0.0126517	down	yes	0.074275	0.008705	0.042701	0.29823	0.317983	0.120072
ssc05014	Human Diseases	Neurodegenerative disease	Amyotrophic lateral sclerosis	0.961322	0.984302	ENSSSCG00000059665	CEP192	0.488575	-1.03335	0.000685317	0.0268065	down	yes	2.78597	1.65281	2.41829	6.04044	4.79214	3.20225
ssc05014	Human Diseases	Neurodegenerative disease	Amyotrophic lateral sclerosis	0.961322	0.984302	ENSSSCG00000010073	CHCHD10	2.3538	1.23499	0.00114573	0.0395319	up	yes	145.218	302.479	174.672	50.9242	73.9713	139.515
ssc04550	Cellular Processes	Cellular community - eukaryotes	Signaling pathways regulating pluripotency of stem cells	0.972872	0.992175	ENSSSCG00000035524	WNT9B	0.0878802	-3.50832	1.07095e-20	5.07714e-17	down	yes	0.08171	0.088024	0.11439	1.22233	0.961308	1.04944
ssc04723	Organismal Systems	Nervous system	Retrograde endocannabinoid signaling	0.980467	0.99406	ENSSSCG00000041764	CACNA1C	0.417116	-1.26148	0.000233939	0.0122413	down	yes	0.652194	0.690959	0.533839	1.75916	1.81219	0.928585
ssc04714	Organismal Systems	Environmental adaptation	Thermogenesis	0.984215	0.99406	ENSSSCG00000012880	CPT1A	0.328307	-1.60688	3.77987e-10	1.59997e-07	down	yes	6.63109	5.29289	6.21136	23.2543	20.0516	11.9332
ssc04714	Organismal Systems	Environmental adaptation	Thermogenesis	0.984215	0.99406	ENSSSCG00000003558	RPS6KA1	0.362549	-1.46375	7.4794e-09	2.11062e-06	down	yes	1.5968	0.916633	1.21914	3.78318	3.57171	2.9405
ssc03013	Genetic Information Processing	Translation	Nucleocytoplasmic transport	0.986324	0.99406	ENSSSCG00000059665	CEP192	0.488575	-1.03335	0.000685317	0.0268065	down	yes	2.78597	1.65281	2.41829	6.04044	4.79214	3.20225
ssc05016	Human Diseases	Neurodegenerative disease	Huntington disease	0.997389	1	ENSSSCG00000000884	APAF1	0.352906	-1.50264	6.00109e-07	0.00010537	down	yes	5.15605	6.92886	7.05755	23.5103	19.6224	11.1096
ssc05016	Human Diseases	Neurodegenerative disease	Huntington disease	0.997389	1	ENSSSCG00000018015	DNAH9	0.170696	-2.5505	0.000246052	0.0126517	down	yes	0.074275	0.008705	0.042701	0.29823	0.317983	0.120072
ssc04740	Organismal Systems	Sensory system	Olfactory transduction	1	1	ENSSSCG00000014852	ARRB1	0.409585	-1.28776	4.25724e-10	1.73989e-07	down	yes	4.0559	2.85499	3.12716	9.11295	8.37177	7.02312
ssc04740	Organismal Systems	Sensory system	Olfactory transduction	1	1	ENSSSCG00000039535	CAMK2B	0.0501412	-4.31786	0.00011841	0.0073067	down	yes	0.0813007	0	0.049531	1.51878	1.04571	0.0447753
ssc04740	Organismal Systems	Sensory system	Olfactory transduction	1	1	ENSSSCG00000025345	GUCY2D	0.358857	-1.47852	0.00072414	0.0280474	down	yes	0.681588	0.300543	0.320806	1.27504	1.29181	1.06395
ssc04740	Organismal Systems	Sensory system	Olfactory transduction	1	1	ENSSSCG00000055915	ENSSSCG00000055915	4.46262	2.15789	0.00152979	0.0490691	up	yes	0.208798	0.468566	0.528721	0.058469	0.080233	0.131562
